# Supplementary material for: A multi-omic survey of black cottonwood tissues highlights coordinated transcriptomic and metabolomic mechanisms for plant adaptation to phosphorus deficiency
Source: Frontiers journal article supplement (doi:10.3389/fpls.2024.1324608), 2024-04-05
Supplement: Data_Sheet_1.zip [file Data_Sheet_1.zip]

## Sheet: Genes_leaf
Gene_ID	Log2FC	P-adj	Sig
Potri.001G000100	NA	NA	NA
Potri.001G000200	0	NA	NA
Potri.001G000300	0	NA	NA
Potri.001G000400	0.1	0.45	FALSE
Potri.001G000500	-3.7	0.19	FALSE
Potri.001G000600	0	NA	NA
Potri.001G000700	0.14	0.019	TRUE
Potri.001G000800	-0.53	0.033	TRUE
Potri.001G000900	0.17	0.058	FALSE
Potri.001G001000	0.15	0.65	FALSE
Potri.001G001100	1.1	3.3e-07	TRUE
Potri.001G001200	0.83	0.72	FALSE
Potri.001G001300	0.19	0.22	FALSE
Potri.001G001400	-0.055	0.64	FALSE
Potri.001G001500	-0.18	0.075	FALSE
Potri.001G001600	-0.53	1.2e-06	TRUE
Potri.001G001700	0.4	3.5e-06	TRUE
Potri.001G001800	-0.074	0.76	FALSE
Potri.001G001900	-2.2	NA	NA
Potri.001G002000	0.12	0.18	FALSE
Potri.001G002100	0.18	0.64	FALSE
Potri.001G002200	-0.37	0.29	FALSE
Potri.001G002300	-0.056	0.75	FALSE
Potri.001G002400	-0.11	0.83	FALSE
Potri.001G002500	0.52	5.4e-09	TRUE
Potri.001G002600	-0.24	0.34	FALSE
Potri.001G002700	2.4	2.3e-25	TRUE
Potri.001G002800	-0.92	0.28	FALSE
Potri.001G002900	1.7	0.0025	TRUE
Potri.001G003000	-0.52	0.79	FALSE
Potri.001G003100	0.39	0.07	FALSE
Potri.001G003200	0.66	0.15	FALSE
Potri.001G003300	0.47	0.13	FALSE
Potri.001G003400	-0.36	0.028	TRUE
Potri.001G003500	-0.85	0.0027	TRUE
Potri.001G003600	-5	0.079	FALSE
Potri.001G003700	0.15	0.45	FALSE
Potri.001G003800	0.49	8.4e-05	TRUE
Potri.001G003900	0.00099	1	FALSE
Potri.001G004000	0.34	0.012	TRUE
Potri.001G004100	-0.16	0.43	FALSE
Potri.001G004200	-0.33	0.015	TRUE
Potri.001G004300	-0.021	0.9	FALSE
Potri.001G004400	-0.54	NA	NA
Potri.001G004500	0.53	1e-05	TRUE
Potri.001G004600	0.61	5.8e-05	TRUE
Potri.001G004700	-1	0.24	FALSE
Potri.001G004800	-0.42	7.1e-09	TRUE
Potri.001G004900	-2.7	0.39	FALSE
Potri.001G005000	0.17	0.33	FALSE
Potri.001G005100	-0.22	0.34	FALSE
Potri.001G005200	-0.82	0.0004	TRUE
Potri.001G005300	0.53	0.056	FALSE
Potri.001G005400	-2.2	0.0011	TRUE
Potri.001G005500	0.36	0.042	TRUE
Potri.001G005600	-3.6	0.18	FALSE
Potri.001G005700	3.2	0.38	FALSE
Potri.001G005800	0	NA	NA
Potri.001G005900	0.069	0.74	FALSE
Potri.001G006000	1.4	4.2e-10	TRUE
Potri.001G006100	-0.47	0.052	FALSE
Potri.001G006200	-1.1	0.0049	TRUE
Potri.001G006300	0.0052	0.99	FALSE
Potri.001G006400	-0.083	0.39	FALSE
Potri.001G006500	0.08	0.82	FALSE
Potri.001G006600	1.3	0.041	TRUE
Potri.001G006700	-1.3	0.00044	TRUE
Potri.001G006800	2.2	NA	NA
Potri.001G006900	3.2	NA	NA
Potri.001G007000	-1.3	3.6e-05	TRUE
Potri.001G007100	-2.8	0.094	FALSE
Potri.001G007200	-0.97	6.5e-13	TRUE
Potri.001G007300	-0.69	0.00061	TRUE
Potri.001G007400	0.048	0.99	FALSE
Potri.001G007500	-1.1	0.031	TRUE
Potri.001G007600	NA	NA	NA
Potri.001G007700	-0.43	0.74	FALSE
Potri.001G007800	0.067	0.24	FALSE
Potri.001G007900	-0.11	0.18	FALSE
Potri.001G008000	0.042	0.88	FALSE
Potri.001G008100	-5	0.0054	TRUE
Potri.001G008200	-0.84	0.77	FALSE
Potri.001G008300	-0.19	0.41	FALSE
Potri.001G008400	-0.077	0.78	FALSE
Potri.001G008500	0.48	0.027	TRUE
Potri.001G008600	3.2	0.35	FALSE
Potri.001G008700	0.54	0.00011	TRUE
Potri.001G008800	0.054	0.57	FALSE
Potri.001G008900	-7.9	6.4e-20	TRUE
Potri.001G009000	-1.8	0.012	TRUE
Potri.001G009100	0.046	0.92	FALSE
Potri.001G009200	0.62	0.12	FALSE
Potri.001G009300	3.4	0.022	TRUE
Potri.001G009400	0.21	0.92	FALSE
Potri.001G009500	0.24	0.46	FALSE
Potri.001G009600	-0.57	0.0074	TRUE
Potri.001G009700	-0.45	1.6e-05	TRUE
Potri.001G009800	0.45	0.0046	TRUE
Potri.001G009900	-0.91	0.74	FALSE
Potri.001G010000	2.5	1.9e-13	TRUE
Potri.001G010100	3.3	8.9e-47	TRUE
Potri.001G010200	2.8	7.3e-34	TRUE
Potri.001G010300	-2.6	5.4e-07	TRUE
Potri.001G010400	-0.0097	0.97	FALSE
Potri.001G010500	-0.86	2.3e-11	TRUE
Potri.001G010600	-1.5	0.0083	TRUE
Potri.001G010700	0.36	0.1	FALSE
Potri.001G010800	0.045	0.75	FALSE
Potri.001G010900	0.81	0.5	FALSE
Potri.001G011000	2.5	2.6e-08	TRUE
Potri.001G011100	NA	NA	NA
Potri.001G011200	1.9	0.048	TRUE
Potri.001G011300	1.2	1.1e-05	TRUE
Potri.001G011400	0	NA	NA
Potri.001G011500	1.9	0.0076	TRUE
Potri.001G011600	NA	NA	NA
Potri.001G011700	0.75	0.00093	TRUE
Potri.001G011800	-0.18	0.23	FALSE
Potri.001G011900	-0.33	0.0049	TRUE
Potri.001G012000	-1	0.00056	TRUE
Potri.001G012100	NA	NA	NA
Potri.001G012200	0.07	0.82	FALSE
Potri.001G012300	-0.021	0.97	FALSE
Potri.001G012400	0	1	FALSE
Potri.001G012500	0	NA	NA
Potri.001G012600	3.4	NA	NA
Potri.001G012700	0.85	0.028	TRUE
Potri.001G012800	-0.25	0.16	FALSE
Potri.001G012900	4.8	NA	NA
Potri.001G013000	2.1	0.0002	TRUE
Potri.001G013100	-2.2	NA	NA
Potri.001G013200	0.023	0.86	FALSE
Potri.001G013300	0.048	0.71	FALSE
Potri.001G013400	1.4	7e-08	TRUE
Potri.001G013500	0.3	0.2	FALSE
Potri.001G013600	0.11	0.63	FALSE
Potri.001G013700	0.21	0.069	FALSE
Potri.001G013800	-0.13	0.072	FALSE
Potri.001G013900	0.037	0.72	FALSE
Potri.001G014000	0.38	1.7e-06	TRUE
Potri.001G014100	-1.4	0.13	FALSE
Potri.001G014200	0	NA	NA
Potri.001G014300	-1	0.41	FALSE
Potri.001G014400	-0.81	0.31	FALSE
Potri.001G014500	6	NA	NA
Potri.001G014600	-0.36	0.79	FALSE
Potri.001G014700	3.7	3.5e-07	TRUE
Potri.001G014800	3.2	NA	NA
Potri.001G014900	0.42	0.079	FALSE
Potri.001G015000	0.22	0.021	TRUE
Potri.001G015100	1.2	0.17	FALSE
Potri.001G015200	NA	NA	NA
Potri.001G015300	2.3	0.003	TRUE
Potri.001G015400	1.1	NA	NA
Potri.001G015500	3.5	0.0053	TRUE
Potri.001G015600	3.4	0.024	TRUE
Potri.001G015700	0.22	0.51	FALSE
Potri.001G015800	NA	NA	NA
Potri.001G015900	-0.96	1e-10	TRUE
Potri.001G016000	0.3	0.049	TRUE
Potri.001G016100	-2.8	NA	NA
Potri.001G016200	0.92	2.8e-06	TRUE
Potri.001G016300	0.98	1.1e-10	TRUE
Potri.001G016400	NA	NA	NA
Potri.001G016500	0	NA	NA
Potri.001G016600	0.04	0.89	FALSE
Potri.001G016700	0.24	0.43	FALSE
Potri.001G016800	0.11	0.82	FALSE
Potri.001G016900	0.77	0.019	TRUE
Potri.001G017000	0.45	0.13	FALSE
Potri.001G017100	-0.59	0.035	TRUE
Potri.001G017200	4.3	NA	NA
Potri.001G017300	-0.082	0.58	FALSE
Potri.001G017400	NA	NA	NA
Potri.001G017500	-0.38	0.22	FALSE
Potri.001G017600	0.65	0.19	FALSE
Potri.001G017700	-0.29	0.55	FALSE
Potri.001G017800	-0.033	0.98	FALSE
Potri.001G017900	0.46	0.62	FALSE
Potri.001G018000	0	NA	NA
Potri.001G018100	0.28	0.058	FALSE
Potri.001G018200	-0.17	0.26	FALSE
Potri.001G018300	0.25	0.44	FALSE
Potri.001G018400	3.2	0.33	FALSE
Potri.001G018500	0.044	0.78	FALSE
Potri.001G018600	7.6	0.013	TRUE
Potri.001G018700	0.63	0.022	TRUE
Potri.001G018800	0.23	0.0045	TRUE
Potri.001G018900	-3	NA	NA
Potri.001G019000	0.34	4.5e-05	TRUE
Potri.001G019100	-2.2	3.9e-29	TRUE
Potri.001G019200	0.49	0.01	TRUE
Potri.001G019300	-0.18	0.93	FALSE
Potri.001G019400	-1.3	1.2e-07	TRUE
Potri.001G019500	0.19	0.39	FALSE
Potri.001G019600	0.17	0.22	FALSE
Potri.001G019700	1.8	0.0022	TRUE
Potri.001G019800	-1.1	0.46	FALSE
Potri.001G019900	-3.2	0.26	FALSE
Potri.001G020000	-4.5	0.021	TRUE
Potri.001G020100	3.2	0.34	FALSE
Potri.001G020200	0.78	0.00045	TRUE
Potri.001G020300	0.66	3.6e-07	TRUE
Potri.001G020400	-1	NA	NA
Potri.001G020500	0.9	0.001	TRUE
Potri.001G020600	-3.1	2.9e-06	TRUE
Potri.001G020700	0.24	0.057	FALSE
Potri.001G020800	-1.8	2e-10	TRUE
Potri.001G020900	-0.32	0.54	FALSE
Potri.001G021000	0.61	0.0099	TRUE
Potri.001G021100	-0.25	0.22	FALSE
Potri.001G021200	1.7	0.011	TRUE
Potri.001G021300	1.5	0.024	TRUE
Potri.001G021400	NA	NA	NA
Potri.001G021500	-0.16	0.34	FALSE
Potri.001G021600	-0.75	5.5e-07	TRUE
Potri.001G021700	0	NA	NA
Potri.001G021800	NA	NA	NA
Potri.001G021900	-0.25	0.92	FALSE
Potri.001G022000	NA	NA	NA
Potri.001G022100	0.97	NA	NA
Potri.001G022200	NA	NA	NA
Potri.001G022300	-1.7	NA	NA
Potri.001G022400	0.22	0.36	FALSE
Potri.001G022500	0.18	0.14	FALSE
Potri.001G022600	-0.49	0.83	FALSE
Potri.001G022700	0.19	0.2	FALSE
Potri.001G022800	NA	NA	NA
Potri.001G022900	0.3	0.35	FALSE
Potri.001G023000	0.038	0.88	FALSE
Potri.001G023100	0.14	0.37	FALSE
Potri.001G023200	NA	NA	NA
Potri.001G023300	0	NA	NA
Potri.001G023400	-0.51	0.49	FALSE
Potri.001G023500	-1.1	1e-10	TRUE
Potri.001G023600	1.3	0.094	FALSE
Potri.001G023700	NA	NA	NA
Potri.001G023800	0.15	0.67	FALSE
Potri.001G023900	0.0072	1	FALSE
Potri.001G024000	0.14	0.22	FALSE
Potri.001G024100	0.57	9.7e-05	TRUE
Potri.001G024200	-0.086	0.62	FALSE
Potri.001G024300	1.4	5.2e-18	TRUE
Potri.001G024400	0.29	0.51	FALSE
Potri.001G024500	-0.3	0.04	TRUE
Potri.001G024600	0.23	0.41	FALSE
Potri.001G024700	NA	NA	NA
Potri.001G024800	1.5	2.2e-14	TRUE
Potri.001G024900	1.6	4.8e-12	TRUE
Potri.001G025000	0.63	NA	NA
Potri.001G025100	-0.52	5.2e-05	TRUE
Potri.001G025200	0.14	0.9	FALSE
Potri.001G025300	-0.72	0.04	TRUE
Potri.001G025400	0.077	0.7	FALSE
Potri.001G025500	-0.65	0.37	FALSE
Potri.001G025600	0.42	0.26	FALSE
Potri.001G025700	1.3	0.55	FALSE
Potri.001G025800	-2.2	0.23	FALSE
Potri.001G025900	NA	NA	NA
Potri.001G026000	-0.22	0.26	FALSE
Potri.001G026100	-0.37	0.0003	TRUE
Potri.001G026200	-2.4	1.3e-30	TRUE
Potri.001G026300	0.5	1.4e-05	TRUE
Potri.001G026400	-0.85	0.013	TRUE
Potri.001G026500	-0.55	0.51	FALSE
Potri.001G026600	-0.56	2.9e-09	TRUE
Potri.001G026700	-0.19	0.057	FALSE
Potri.001G026800	0.23	0.033	TRUE
Potri.001G026900	0.058	0.81	FALSE
Potri.001G027000	-2.8	4.8e-18	TRUE
Potri.001G027100	-1.5	0.049	TRUE
Potri.001G027200	0.56	0.16	FALSE
Potri.001G027300	NA	NA	NA
Potri.001G027400	0.79	8.4e-09	TRUE
Potri.001G027500	0	NA	NA
Potri.001G027600	0.018	0.95	FALSE
Potri.001G027700	2.2	1.5e-07	TRUE
Potri.001G027800	0	NA	NA
Potri.001G027900	-0.047	0.96	FALSE
Potri.001G028000	0.26	0.37	FALSE
Potri.001G028100	-0.55	0.00079	TRUE
Potri.001G028200	2.1	3e-11	TRUE
Potri.001G028300	-0.25	0.042	TRUE
Potri.001G028400	0.42	0.06	FALSE
Potri.001G028500	0.42	0.014	TRUE
Potri.001G028600	0	1	FALSE
Potri.001G028700	-0.053	0.91	FALSE
Potri.001G028800	0.53	0.24	FALSE
Potri.001G028900	-4.7	0.0083	TRUE
Potri.001G029000	0.52	0.043	TRUE
Potri.001G029100	NA	NA	NA
Potri.001G029200	NA	NA	NA
Potri.001G029300	0.097	0.72	FALSE
Potri.001G029400	-0.22	0.047	TRUE
Potri.001G029500	0.14	0.62	FALSE
Potri.001G029600	-0.4	0.00037	TRUE
Potri.001G029700	-4.4	4e-16	TRUE
Potri.001G029800	-0.28	0.035	TRUE
Potri.001G029900	0.39	0.0025	TRUE
Potri.001G030000	0.27	0.0056	TRUE
Potri.001G030100	-0.026	0.87	FALSE
Potri.001G030200	0.033	0.84	FALSE
Potri.001G030300	0.15	0.37	FALSE
Potri.001G030400	0	NA	NA
Potri.001G030500	NA	NA	NA
Potri.001G030600	-3.7	0.00079	TRUE
Potri.001G030700	-0.28	0.0011	TRUE
Potri.001G030800	-0.45	0.023	TRUE
Potri.001G030900	-0.016	0.87	FALSE
Potri.001G031000	NA	NA	NA
Potri.001G031100	NA	NA	NA
Potri.001G031200	NA	NA	NA
Potri.001G031300	NA	NA	NA
Potri.001G031400	-0.046	0.81	FALSE
Potri.001G031500	0.012	0.97	FALSE
Potri.001G031600	-2.5	0.29	FALSE
Potri.001G031700	-0.084	0.44	FALSE
Potri.001G031800	-1.7	2.4e-09	TRUE
Potri.001G031900	0	NA	NA
Potri.001G032000	-0.4	0.00011	TRUE
Potri.001G032100	1	NA	NA
Potri.001G032200	0.094	0.93	FALSE
Potri.001G032300	-2.7	0.4	FALSE
Potri.001G032400	-0.035	0.96	FALSE
Potri.001G032500	-0.14	0.66	FALSE
Potri.001G032600	-0.86	0.16	FALSE
Potri.001G032700	0.84	0.74	FALSE
Potri.001G032800	0.37	0.0026	TRUE
Potri.001G032900	0.043	0.85	FALSE
Potri.001G033000	-2.5	NA	NA
Potri.001G033100	-0.72	0.67	FALSE
Potri.001G033200	-0.2	0.075	FALSE
Potri.001G033300	0	1	FALSE
Potri.001G033400	-1.8	0.1	FALSE
Potri.001G033500	0.64	0.0012	TRUE
Potri.001G033600	-0.1	0.4	FALSE
Potri.001G033700	0.16	NA	NA
Potri.001G033800	-0.051	0.91	FALSE
Potri.001G033900	-0.027	0.83	FALSE
Potri.001G034000	NA	NA	NA
Potri.001G034100	-0.15	0.83	FALSE
Potri.001G034200	-0.48	6.3e-08	TRUE
Potri.001G034300	-1	0.00061	TRUE
Potri.001G034400	0.31	0.028	TRUE
Potri.001G034500	0.031	0.9	FALSE
Potri.001G034600	0.38	0.043	TRUE
Potri.001G034700	-0.16	0.22	FALSE
Potri.001G034800	3.1	NA	NA
Potri.001G034900	0.084	0.89	FALSE
Potri.001G035000	-0.17	0.2	FALSE
Potri.001G035100	5.1	NA	NA
Potri.001G035200	0.43	0.028	TRUE
Potri.001G035300	-0.13	0.56	FALSE
Potri.001G035400	1.7	0.078	FALSE
Potri.001G035500	-0.37	0.34	FALSE
Potri.001G035600	0.85	0.00037	TRUE
Potri.001G035700	-0.14	0.31	FALSE
Potri.001G035800	-1	7.6e-30	TRUE
Potri.001G035900	-0.63	0.44	FALSE
Potri.001G036000	0.051	0.77	FALSE
Potri.001G036100	-0.96	3.1e-19	TRUE
Potri.001G036200	NA	NA	NA
Potri.001G036300	-0.065	0.72	FALSE
Potri.001G036400	-0.1	0.23	FALSE
Potri.001G036500	0.4	0.81	FALSE
Potri.001G036600	-0.76	0.12	FALSE
Potri.001G036700	-1.5	0.32	FALSE
Potri.001G036800	-0.0033	0.98	FALSE
Potri.001G036900	-1.2	1e-18	TRUE
Potri.001G037000	-1.5	1.9e-05	TRUE
Potri.001G037100	-1.6	0.0041	TRUE
Potri.001G037200	0.12	0.54	FALSE
Potri.001G037300	-0.0096	0.98	FALSE
Potri.001G037400	0.084	0.76	FALSE
Potri.001G037500	0.17	0.42	FALSE
Potri.001G037600	-2.5	NA	NA
Potri.001G037700	0.7	0.037	TRUE
Potri.001G037800	-1.5	NA	NA
Potri.001G037900	0.14	0.76	FALSE
Potri.001G038000	-0.22	0.0047	TRUE
Potri.001G038100	-0.064	0.78	FALSE
Potri.001G038200	1.6	7.4e-22	TRUE
Potri.001G038300	-2.1	0.00016	TRUE
Potri.001G038400	-0.6	0.61	FALSE
Potri.001G038500	-3.4	NA	NA
Potri.001G038600	0	1	FALSE
Potri.001G038700	-0.31	NA	NA
Potri.001G038800	2.5	0.11	FALSE
Potri.001G038900	1.4	0.36	FALSE
Potri.001G039000	0	NA	NA
Potri.001G039100	0	1	FALSE
Potri.001G039200	-2.7	6.3e-06	TRUE
Potri.001G039300	0.028	NA	NA
Potri.001G039400	-0.45	NA	NA
Potri.001G039500	NA	NA	NA
Potri.001G039600	NA	NA	NA
Potri.001G039700	-1.5	0.56	FALSE
Potri.001G039800	-1.7	0.68	FALSE
Potri.001G039900	1.3	0.48	FALSE
Potri.001G040000	-2.2	0.083	FALSE
Potri.001G040100	1.7	0.15	FALSE
Potri.001G040200	0.11	0.96	FALSE
Potri.001G040300	-0.17	0.96	FALSE
Potri.001G040400	NA	NA	NA
Potri.001G040500	-1.6	0.1	FALSE
Potri.001G040600	0	1	FALSE
Potri.001G040700	NA	NA	NA
Potri.001G040800	-5.9	6.2e-13	TRUE
Potri.001G040900	-4.4	0.00073	TRUE
Potri.001G041000	-5.5	5e-06	TRUE
Potri.001G041100	-2.5	1e-05	TRUE
Potri.001G041200	0.62	5e-05	TRUE
Potri.001G041300	0.24	0.78	FALSE
Potri.001G041400	0.39	0.23	FALSE
Potri.001G041500	-0.34	0.11	FALSE
Potri.001G041600	-0.17	0.36	FALSE
Potri.001G041700	0.14	0.68	FALSE
Potri.001G041800	-1.3	2.5e-06	TRUE
Potri.001G041900	0.99	1.3e-07	TRUE
Potri.001G042000	-0.055	0.84	FALSE
Potri.001G042100	0	1	FALSE
Potri.001G042200	-0.32	0.78	FALSE
Potri.001G042300	-1.5	NA	NA
Potri.001G042400	-0.04	0.96	FALSE
Potri.001G042500	-1.3	0.17	FALSE
Potri.001G042600	-2	0.0021	TRUE
Potri.001G042700	-1.4	0.022	TRUE
Potri.001G042800	-0.19	0.64	FALSE
Potri.001G042900	-0.45	0.0086	TRUE
Potri.001G043000	0.3	0.058	FALSE
Potri.001G043100	1.7	1.2e-10	TRUE
Potri.001G043200	-0.077	0.42	FALSE
Potri.001G043300	0.46	0.012	TRUE
Potri.001G043400	-0.17	0.33	FALSE
Potri.001G043500	0.22	0.3	FALSE
Potri.001G043600	0.5	0.048	TRUE
Potri.001G043700	0.91	0.0071	TRUE
Potri.001G043800	-4.3	NA	NA
Potri.001G043900	1.4	0.18	FALSE
Potri.001G044000	0.57	1.4e-06	TRUE
Potri.001G044100	-0.46	0.57	FALSE
Potri.001G044200	0.27	0.11	FALSE
Potri.001G044300	0.38	0.056	FALSE
Potri.001G044400	-1.3	4.8e-05	TRUE
Potri.001G044500	-2.6	2.5e-26	TRUE
Potri.001G044600	-3.8	3.3e-08	TRUE
Potri.001G044700	-0.18	0.13	FALSE
Potri.001G044800	0.9	0.74	FALSE
Potri.001G044900	0.34	0.022	TRUE
Potri.001G045000	1.2	NA	NA
Potri.001G045100	0.11	0.95	FALSE
Potri.001G045200	-1.1	0.047	TRUE
Potri.001G045300	0.28	0.87	FALSE
Potri.001G045400	NA	NA	NA
Potri.001G045500	2.5	0.00027	TRUE
Potri.001G045600	-5.8	0.00073	TRUE
Potri.001G045700	0.75	NA	NA
Potri.001G045800	-1.1	0.14	FALSE
Potri.001G045900	1.8	0.59	FALSE
Potri.001G046000	-0.42	0.39	FALSE
Potri.001G046100	-2.7	4.9e-08	TRUE
Potri.001G046200	NA	NA	NA
Potri.001G046300	0.28	0.72	FALSE
Potri.001G046400	-5.2	3.5e-23	TRUE
Potri.001G046500	0.21	0.039	TRUE
Potri.001G046600	0.15	0.44	FALSE
Potri.001G046700	-0.32	0.031	TRUE
Potri.001G046800	-0.041	0.95	FALSE
Potri.001G046900	-0.5	0.0041	TRUE
Potri.001G047000	-0.69	0.7	FALSE
Potri.001G047100	-0.31	8.8e-05	TRUE
Potri.001G047200	0.48	0.00051	TRUE
Potri.001G047300	-0.24	0.45	FALSE
Potri.001G047400	-0.047	0.75	FALSE
Potri.001G047500	-0.075	0.79	FALSE
Potri.001G047600	-0.07	0.79	FALSE
Potri.001G047700	0.73	0.00033	TRUE
Potri.001G047800	0.24	0.38	FALSE
Potri.001G047900	-0.27	0.0026	TRUE
Potri.001G048000	NA	NA	NA
Potri.001G048100	0.26	0.037	TRUE
Potri.001G048200	1.1	4.9e-05	TRUE
Potri.001G048300	-0.8	0.76	FALSE
Potri.001G048400	3.4	NA	NA
Potri.001G048500	-0.28	0.39	FALSE
Potri.001G048600	0	NA	NA
Potri.001G048700	-1.9	1.4e-14	TRUE
Potri.001G048800	-1.3	0.00085	TRUE
Potri.001G048900	0.15	0.87	FALSE
Potri.001G049000	-1.1	0.13	FALSE
Potri.001G049100	-0.3	0.72	FALSE
Potri.001G049200	0.58	0.22	FALSE
Potri.001G049300	-0.1	0.44	FALSE
Potri.001G049400	0.1	0.31	FALSE
Potri.001G049500	NA	NA	NA
Potri.001G049600	2.3	1.6e-05	TRUE
Potri.001G049700	-0.19	0.66	FALSE
Potri.001G049800	-0.3	0.064	FALSE
Potri.001G049900	0.49	0.067	FALSE
Potri.001G050000	-0.27	0.00047	TRUE
Potri.001G050100	-0.68	0.00029	TRUE
Potri.001G050200	4.2	NA	NA
Potri.001G050300	0.28	0.44	FALSE
Potri.001G050400	-1.2	4e-07	TRUE
Potri.001G050500	NA	NA	NA
Potri.001G050600	0.18	0.5	FALSE
Potri.001G050700	-0.14	0.3	FALSE
Potri.001G050800	-1.5	0.17	FALSE
Potri.001G050900	-2.7	NA	NA
Potri.001G051000	0.28	0.55	FALSE
Potri.001G051100	-2.5	NA	NA
Potri.001G051200	-0.003	0.99	FALSE
Potri.001G051300	0.75	0.07	FALSE
Potri.001G051400	-0.38	0.00012	TRUE
Potri.001G051500	-2	1.2e-08	TRUE
Potri.001G051600	-2.3	1.7e-13	TRUE
Potri.001G051700	0.24	0.076	FALSE
Potri.001G051800	0.27	0.16	FALSE
Potri.001G051900	-0.17	0.42	FALSE
Potri.001G052000	5.5	NA	NA
Potri.001G052100	-0.44	0.00031	TRUE
Potri.001G052200	0	NA	NA
Potri.001G052300	0.78	0.0052	TRUE
Potri.001G052400	0.23	0.11	FALSE
Potri.001G052500	2.7	0.018	TRUE
Potri.001G052600	NA	NA	NA
Potri.001G052700	0	NA	NA
Potri.001G052800	0	NA	NA
Potri.001G052900	0	1	FALSE
Potri.001G053000	0.02	0.98	FALSE
Potri.001G053100	2	5.6e-05	TRUE
Potri.001G053200	0	1	FALSE
Potri.001G053300	0	NA	NA
Potri.001G053400	0.32	0.15	FALSE
Potri.001G053500	-0.57	1e-05	TRUE
Potri.001G053600	0.39	0.00012	TRUE
Potri.001G053700	0.62	7.2e-06	TRUE
Potri.001G053800	0.18	0.16	FALSE
Potri.001G053900	1	0.24	FALSE
Potri.001G054000	2.4	0.27	FALSE
Potri.001G054100	-3.6	0.19	FALSE
Potri.001G054200	-2.1	0.32	FALSE
Potri.001G054300	-1.4	NA	NA
Potri.001G054400	-0.37	0.095	FALSE
Potri.001G054500	0.23	0.037	TRUE
Potri.001G054600	0.26	0.56	FALSE
Potri.001G054700	-0.14	0.55	FALSE
Potri.001G054800	-0.81	0.11	FALSE
Potri.001G054900	-0.13	0.18	FALSE
Potri.001G055000	-0.073	0.87	FALSE
Potri.001G055100	0.25	0.5	FALSE
Potri.001G055200	0.36	0.48	FALSE
Potri.001G055300	-0.28	0.1	FALSE
Potri.001G055400	0.15	0.5	FALSE
Potri.001G055500	NA	NA	NA
Potri.001G055600	-3	0.089	FALSE
Potri.001G055700	-2.4	NA	NA
Potri.001G055800	-0.97	0.54	FALSE
Potri.001G055900	0.37	0.0028	TRUE
Potri.001G056000	-0.098	0.28	FALSE
Potri.001G056100	-0.15	0.31	FALSE
Potri.001G056200	-0.41	0.099	FALSE
Potri.001G056300	-1.8	0.00041	TRUE
Potri.001G056400	0.022	0.98	FALSE
Potri.001G056500	0.49	0.011	TRUE
Potri.001G056600	-1.3	4.5e-05	TRUE
Potri.001G056700	0.76	NA	NA
Potri.001G056800	-0.007	0.98	FALSE
Potri.001G056900	-1.4	0.1	FALSE
Potri.001G057000	-1.7	NA	NA
Potri.001G057100	-0.31	0.0035	TRUE
Potri.001G057200	-0.34	0.0014	TRUE
Potri.001G057300	0.62	0.029	TRUE
Potri.001G057400	0.29	0.038	TRUE
Potri.001G057500	0.013	0.96	FALSE
Potri.001G057600	-0.16	NA	NA
Potri.001G057700	-0.024	1	FALSE
Potri.001G057800	0.11	0.18	FALSE
Potri.001G057900	4.8	0.096	FALSE
Potri.001G058000	0.085	0.9	FALSE
Potri.001G058100	0.31	0.29	FALSE
Potri.001G058200	1.4	0.017	TRUE
Potri.001G058300	NA	NA	NA
Potri.001G058400	4.1	0.0024	TRUE
Potri.001G058500	0.16	0.72	FALSE
Potri.001G058600	0.83	2.1e-06	TRUE
Potri.001G058700	-0.0055	0.97	FALSE
Potri.001G058800	-1.9	0.046	TRUE
Potri.001G058900	-4.5	0.13	FALSE
Potri.001G059000	0.29	0.36	FALSE
Potri.001G059100	-0.084	0.92	FALSE
Potri.001G059200	1.5	0.33	FALSE
Potri.001G059300	-0.91	0.31	FALSE
Potri.001G059400	0.19	0.45	FALSE
Potri.001G059500	-0.72	0.13	FALSE
Potri.001G059600	1.2	0.24	FALSE
Potri.001G059700	0.23	0.021	TRUE
Potri.001G059800	-0.022	0.99	FALSE
Potri.001G059900	-0.33	0.027	TRUE
Potri.001G060000	0.56	0.0011	TRUE
Potri.001G060100	-0.9	3.5e-08	TRUE
Potri.001G060200	0.83	4.4e-12	TRUE
Potri.001G060300	0.62	0.00016	TRUE
Potri.001G060400	-0.68	0.0028	TRUE
Potri.001G060500	1.9	0.00035	TRUE
Potri.001G060600	-1.4	0.13	FALSE
Potri.001G060700	-1.9	0.0021	TRUE
Potri.001G060800	-0.67	6.8e-05	TRUE
Potri.001G060900	-3	0.0033	TRUE
Potri.001G061000	0.043	0.85	FALSE
Potri.001G061100	-0.28	0.4	FALSE
Potri.001G061200	-0.49	0.017	TRUE
Potri.001G061300	0.38	NA	NA
Potri.001G061400	-0.32	0.00056	TRUE
Potri.001G061500	-0.69	0.00029	TRUE
Potri.001G061600	1.2	0.00079	TRUE
Potri.001G061700	1.1	0.11	FALSE
Potri.001G061800	-1.2	2.8e-05	TRUE
Potri.001G061900	-0.76	0.007	TRUE
Potri.001G062000	-0.37	0.023	TRUE
Potri.001G062100	-0.87	5.5e-08	TRUE
Potri.001G062200	-3.2	NA	NA
Potri.001G062300	0.73	0.62	FALSE
Potri.001G062400	NA	NA	NA
Potri.001G062500	-2	0.00017	TRUE
Potri.001G062600	0.21	0.34	FALSE
Potri.001G062700	0.13	0.74	FALSE
Potri.001G062800	0.058	0.65	FALSE
Potri.001G062900	3.2	0.35	FALSE
Potri.001G063000	0.89	0.53	FALSE
Potri.001G063100	1.7	0.00014	TRUE
Potri.001G063200	2.8	0.38	FALSE
Potri.001G063300	2.6	0.0028	TRUE
Potri.001G063400	3.1	NA	NA
Potri.001G063500	0.21	NA	NA
Potri.001G063600	-1.4	NA	NA
Potri.001G063700	-0.017	1	FALSE
Potri.001G063800	0.1	0.9	FALSE
Potri.001G063900	0.59	0.77	FALSE
Potri.001G064000	5.4	NA	NA
Potri.001G064100	1.1	0.087	FALSE
Potri.001G064200	-2.5	NA	NA
Potri.001G064300	3.5	1.1e-06	TRUE
Potri.001G064400	3.1	NA	NA
Potri.001G064500	3	0.015	TRUE
Potri.001G064600	1.2	0.23	FALSE
Potri.001G064700	1.5	NA	NA
Potri.001G064800	-0.46	NA	NA
Potri.001G064900	2.1	0.011	TRUE
Potri.001G065000	0.54	NA	NA
Potri.001G065100	NA	NA	NA
Potri.001G065200	-1.5	NA	NA
Potri.001G065300	7.2	3.1e-05	TRUE
Potri.001G065400	3.1	0.025	TRUE
Potri.001G065500	NA	NA	NA
Potri.001G065600	-0.4	0.0065	TRUE
Potri.001G065700	0	NA	NA
Potri.001G065800	0.46	0.0002	TRUE
Potri.001G065900	1.9	1.7e-14	TRUE
Potri.001G066000	0.7	0.0051	TRUE
Potri.001G066100	0.1	0.61	FALSE
Potri.001G066200	-0.84	1.1e-19	TRUE
Potri.001G066300	1.2	NA	NA
Potri.001G066400	1.4	0.013	TRUE
Potri.001G066500	0.35	0.51	FALSE
Potri.001G066600	-0.12	0.75	FALSE
Potri.001G066700	0.36	0.12	FALSE
Potri.001G066800	0.13	0.34	FALSE
Potri.001G066900	0.13	0.24	FALSE
Potri.001G067000	-0.32	0.78	FALSE
Potri.001G067100	0.43	NA	NA
Potri.001G067200	0	NA	NA
Potri.001G067300	-0.99	2.7e-07	TRUE
Potri.001G067400	0.19	0.064	FALSE
Potri.001G067500	-1.6	0.013	TRUE
Potri.001G067600	-2.5	1.1e-08	TRUE
Potri.001G067700	-0.71	0.00014	TRUE
Potri.001G067800	0.44	2.4e-08	TRUE
Potri.001G067900	0.12	0.32	FALSE
Potri.001G068000	0.56	4.8e-06	TRUE
Potri.001G068100	0.41	0.21	FALSE
Potri.001G068200	-1.2	0.0001	TRUE
Potri.001G068300	0.4	0.0086	TRUE
Potri.001G068400	0.71	0.0012	TRUE
Potri.001G068500	-0.29	0.11	FALSE
Potri.001G068600	0.52	0.1	FALSE
Potri.001G068700	0.018	0.9	FALSE
Potri.001G068800	0.19	0.36	FALSE
Potri.001G068900	0.13	0.22	FALSE
Potri.001G069000	0.69	0.0023	TRUE
Potri.001G069100	-0.036	0.9	FALSE
Potri.001G069200	1.1	0.019	TRUE
Potri.001G069300	1.8	0.47	FALSE
Potri.001G069400	-1.2	0.0021	TRUE
Potri.001G069500	-0.78	0.0068	TRUE
Potri.001G069600	-0.22	0.88	FALSE
Potri.001G069700	0	1	FALSE
Potri.001G069800	-0.2	0.96	FALSE
Potri.001G069900	0	1	FALSE
Potri.001G070000	NA	NA	NA
Potri.001G070100	-0.9	1.6e-06	TRUE
Potri.001G070200	1	0.0015	TRUE
Potri.001G070300	0.039	0.9	FALSE
Potri.001G070400	0.45	0.029	TRUE
Potri.001G070500	1.1	0.0006	TRUE
Potri.001G070600	1	0.0039	TRUE
Potri.001G070700	-2	1.4e-10	TRUE
Potri.001G070800	-1.5	3.2e-14	TRUE
Potri.001G070900	-0.9	0.041	TRUE
Potri.001G071000	0.41	0.16	FALSE
Potri.001G071100	0.18	0.19	FALSE
Potri.001G071200	-0.58	0.35	FALSE
Potri.001G071300	-0.069	0.96	FALSE
Potri.001G071400	-0.21	0.6	FALSE
Potri.001G071500	0.18	0.69	FALSE
Potri.001G071600	-0.51	0.49	FALSE
Potri.001G071700	-0.48	7.7e-08	TRUE
Potri.001G071800	4.1	NA	NA
Potri.001G071900	0.54	0.00048	TRUE
Potri.001G072000	-0.27	0.092	FALSE
Potri.001G072100	0.11	0.21	FALSE
Potri.001G072200	0.64	4.8e-21	TRUE
Potri.001G072300	-0.87	7.5e-05	TRUE
Potri.001G072400	-0.13	0.21	FALSE
Potri.001G072500	1.9	0.0022	TRUE
Potri.001G072600	-0.19	0.16	FALSE
Potri.001G072700	0.0029	0.99	FALSE
Potri.001G072800	0.22	0.017	TRUE
Potri.001G072900	-5.5	0.05	FALSE
Potri.001G073000	0.5	0.00049	TRUE
Potri.001G073100	-3.4	4.4e-20	TRUE
Potri.001G073200	-0.21	0.95	FALSE
Potri.001G073300	-0.19	0.32	FALSE
Potri.001G073400	0.25	0.019	TRUE
Potri.001G073500	0.088	0.49	FALSE
Potri.001G073600	0.61	0.0088	TRUE
Potri.001G073700	0.27	0.011	TRUE
Potri.001G073800	-0.28	0.0093	TRUE
Potri.001G073900	0.012	0.98	FALSE
Potri.001G074000	0.72	0.016	TRUE
Potri.001G074100	0.21	0.93	FALSE
Potri.001G074200	0.29	0.0091	TRUE
Potri.001G074300	-0.79	0.77	FALSE
Potri.001G074400	-0.33	0.1	FALSE
Potri.001G074500	NA	NA	NA
Potri.001G074600	0.19	0.52	FALSE
Potri.001G074700	0.78	0.0066	TRUE
Potri.001G074800	-0.41	0.36	FALSE
Potri.001G074900	0.26	0.26	FALSE
Potri.001G075000	0.33	0.68	FALSE
Potri.001G075100	0	NA	NA
Potri.001G075200	-0.44	0.36	FALSE
Potri.001G075300	-0.035	0.74	FALSE
Potri.001G075400	3.2	0.34	FALSE
Potri.001G075500	1.1	3.4e-12	TRUE
Potri.001G075600	0.7	0.0093	TRUE
Potri.001G075700	0.11	0.7	FALSE
Potri.001G075800	0.11	0.63	FALSE
Potri.001G075900	-0.35	0.15	FALSE
Potri.001G076000	-0.75	0.24	FALSE
Potri.001G076100	-3.3	NA	NA
Potri.001G076200	0.75	5.7e-05	TRUE
Potri.001G076300	0.76	0.06	FALSE
Potri.001G076400	-0.064	0.87	FALSE
Potri.001G076500	0.72	1.1e-06	TRUE
Potri.001G076600	2.3	6.2e-19	TRUE
Potri.001G076700	2.8	2.6e-14	TRUE
Potri.001G076800	-2	0.0086	TRUE
Potri.001G076900	-1.6	0.4	FALSE
Potri.001G077000	-0.36	0.78	FALSE
Potri.001G077100	-0.19	0.68	FALSE
Potri.001G077200	0.76	0.27	FALSE
Potri.001G077300	1	0.13	FALSE
Potri.001G077400	-0.23	0.78	FALSE
Potri.001G077500	-2.5	0.11	FALSE
Potri.001G077600	0.88	1.1e-10	TRUE
Potri.001G077700	-0.67	0.17	FALSE
Potri.001G077800	-0.46	0.86	FALSE
Potri.001G077900	0.26	0.72	FALSE
Potri.001G078000	3.1	5.6e-10	TRUE
Potri.001G078100	0.64	7.5e-06	TRUE
Potri.001G078200	-0.79	0.2	FALSE
Potri.001G078300	-2.6	7.1e-15	TRUE
Potri.001G078400	0.37	0.39	FALSE
Potri.001G078500	-0.23	0.16	FALSE
Potri.001G078600	-0.23	0.025	TRUE
Potri.001G078700	-0.25	0.13	FALSE
Potri.001G078800	0.17	0.59	FALSE
Potri.001G078900	0.45	0.0076	TRUE
Potri.001G079000	-1.1	2.8e-05	TRUE
Potri.001G079100	-0.12	0.57	FALSE
Potri.001G079200	-0.14	0.75	FALSE
Potri.001G079300	-0.072	0.49	FALSE
Potri.001G079400	0.55	2.9e-05	TRUE
Potri.001G079500	0.1	0.58	FALSE
Potri.001G079600	-0.18	0.59	FALSE
Potri.001G079700	NA	NA	NA
Potri.001G079800	0.21	0.73	FALSE
Potri.001G079900	-0.063	0.87	FALSE
Potri.001G080000	-3	NA	NA
Potri.001G080100	0	NA	NA
Potri.001G080200	0.23	0.01	TRUE
Potri.001G080300	NA	NA	NA
Potri.001G080400	-0.039	0.55	FALSE
Potri.001G080500	NA	NA	NA
Potri.001G080600	-7.3	0.0039	TRUE
Potri.001G080700	0.78	0.67	FALSE
Potri.001G080800	0	1	FALSE
Potri.001G080900	0.31	0.77	FALSE
Potri.001G081000	-3.4	NA	NA
Potri.001G081100	-0.43	0.022	TRUE
Potri.001G081200	0.87	0.25	FALSE
Potri.001G081300	-0.11	0.52	FALSE
Potri.001G081400	1.4	7.4e-05	TRUE
Potri.001G081500	0.68	0.22	FALSE
Potri.001G081600	0.31	0.00063	TRUE
Potri.001G081700	-1.4	NA	NA
Potri.001G081800	NA	NA	NA
Potri.001G081900	0.029	0.8	FALSE
Potri.001G082000	-0.014	0.92	FALSE
Potri.001G082100	-0.083	0.5	FALSE
Potri.001G082200	-1.3	0.016	TRUE
Potri.001G082300	-0.24	0.62	FALSE
Potri.001G082400	1.9	0.012	TRUE
Potri.001G082500	0.35	0.2	FALSE
Potri.001G082600	0.48	0.16	FALSE
Potri.001G082700	0.11	0.75	FALSE
Potri.001G082800	-0.77	0.0012	TRUE
Potri.001G082900	0.62	0.0088	TRUE
Potri.001G083000	0.33	0.77	FALSE
Potri.001G083100	0.054	0.61	FALSE
Potri.001G083200	0.1	0.96	FALSE
Potri.001G083300	0.31	0.52	FALSE
Potri.001G083400	0.054	0.9	FALSE
Potri.001G083500	-2.6	0.00044	TRUE
Potri.001G083600	1.9	2.2e-12	TRUE
Potri.001G083700	-7.1	4.1e-23	TRUE
Potri.001G083800	-0.57	2e-05	TRUE
Potri.001G083900	0.18	0.63	FALSE
Potri.001G084000	-0.89	0.0024	TRUE
Potri.001G084100	0.3	0.74	FALSE
Potri.001G084200	-0.64	0.054	FALSE
Potri.001G084300	0.86	2.3e-17	TRUE
Potri.001G084400	0.5	0.022	TRUE
Potri.001G084500	0.5	0.02	TRUE
Potri.001G084600	0.38	0.28	FALSE
Potri.001G084700	0.45	1.6e-07	TRUE
Potri.001G084800	0.48	0.79	FALSE
Potri.001G084900	-0.029	0.95	FALSE
Potri.001G085000	0.39	0.19	FALSE
Potri.001G085100	0.73	0.034	TRUE
Potri.001G085200	-0.4	7.1e-08	TRUE
Potri.001G085300	NA	NA	NA
Potri.001G085400	0.4	0.0059	TRUE
Potri.001G085500	-0.27	0.09	FALSE
Potri.001G085600	-0.17	0.028	TRUE
Potri.001G085700	-2	NA	NA
Potri.001G085800	-1.9	0.14	FALSE
Potri.001G085900	0.8	0.8	FALSE
Potri.001G086000	0.51	0.063	FALSE
Potri.001G086100	0.1	0.48	FALSE
Potri.001G086200	NA	NA	NA
Potri.001G086300	0.1	0.38	FALSE
Potri.001G086400	-0.16	0.35	FALSE
Potri.001G086500	NA	NA	NA
Potri.001G086600	-0.19	0.12	FALSE
Potri.001G086700	-2.4	1.3e-08	TRUE
Potri.001G086800	0.13	0.31	FALSE
Potri.001G086900	-1.2	0.11	FALSE
Potri.001G087000	-1.4	0.3	FALSE
Potri.001G087100	-0.068	0.56	FALSE
Potri.001G087200	-0.034	0.85	FALSE
Potri.001G087300	-0.041	0.64	FALSE
Potri.001G087400	0.11	0.53	FALSE
Potri.001G087500	1	1.5e-15	TRUE
Potri.001G087600	-0.18	0.022	TRUE
Potri.001G087700	0.34	0.24	FALSE
Potri.001G087800	0.32	0.0041	TRUE
Potri.001G087900	-0.77	0.0012	TRUE
Potri.001G088000	0.16	0.15	FALSE
Potri.001G088100	0.23	0.32	FALSE
Potri.001G088200	-0.033	0.78	FALSE
Potri.001G088300	0.83	3.8e-15	TRUE
Potri.001G088400	0.18	0.58	FALSE
Potri.001G088500	8	0.0026	TRUE
Potri.001G088600	0.18	0.36	FALSE
Potri.001G088700	0.91	0.034	TRUE
Potri.001G088800	-0.086	0.68	FALSE
Potri.001G088900	0.31	0.51	FALSE
Potri.001G089000	-0.93	0.5	FALSE
Potri.001G089100	0.52	4.4e-16	TRUE
Potri.001G089200	-2	0.23	FALSE
Potri.001G089300	0.2	0.044	TRUE
Potri.001G089400	0.13	0.28	FALSE
Potri.001G089500	-0.23	0.56	FALSE
Potri.001G089600	0.065	0.62	FALSE
Potri.001G089700	-0.093	0.71	FALSE
Potri.001G089800	0.51	1.7e-12	TRUE
Potri.001G089900	-0.061	0.6	FALSE
Potri.001G090000	0.25	0.18	FALSE
Potri.001G090100	0.26	0.36	FALSE
Potri.001G090200	1.4	0.25	FALSE
Potri.001G090300	-0.31	0.084	FALSE
Potri.001G090400	0.99	0.0015	TRUE
Potri.001G090500	0.33	0.089	FALSE
Potri.001G090600	-0.19	0.012	TRUE
Potri.001G090700	-0.32	0.5	FALSE
Potri.001G090800	0.55	0.016	TRUE
Potri.001G090900	-0.26	0.012	TRUE
Potri.001G091000	0.84	3.3e-10	TRUE
Potri.001G091100	-0.61	2.4e-05	TRUE
Potri.001G091200	NA	NA	NA
Potri.001G091300	0.95	3.2e-18	TRUE
Potri.001G091400	-0.34	0.68	FALSE
Potri.001G091500	-2.2	2.6e-11	TRUE
Potri.001G091600	-0.68	5e-10	TRUE
Potri.001G091700	-0.61	0.004	TRUE
Potri.001G091800	0.061	0.66	FALSE
Potri.001G091900	0.25	0.042	TRUE
Potri.001G092000	-0.17	0.35	FALSE
Potri.001G092100	-3	1.1e-06	TRUE
Potri.001G092200	0.82	0.021	TRUE
Potri.001G092300	-0.34	0.00047	TRUE
Potri.001G092400	0.0054	1	FALSE
Potri.001G092500	1.1	5.9e-16	TRUE
Potri.001G092600	-0.17	0.55	FALSE
Potri.001G092700	-3.2	0.28	FALSE
Potri.001G092800	-0.26	0.15	FALSE
Potri.001G092900	-1.6	0.0056	TRUE
Potri.001G093000	-0.047	0.88	FALSE
Potri.001G093100	0.83	0.011	TRUE
Potri.001G093200	NA	NA	NA
Potri.001G093300	-0.47	0.23	FALSE
Potri.001G093400	-5	NA	NA
Potri.001G093500	-0.45	0.03	TRUE
Potri.001G093600	0.33	0.058	FALSE
Potri.001G093700	0.35	0.29	FALSE
Potri.001G093800	0.33	0.016	TRUE
Potri.001G093900	0.29	0.19	FALSE
Potri.001G094000	0.73	0.5	FALSE
Potri.001G094100	0.2	0.033	TRUE
Potri.001G094200	-0.28	0.039	TRUE
Potri.001G094300	-0.55	0.18	FALSE
Potri.001G094400	-0.07	0.52	FALSE
Potri.001G094500	-0.11	0.43	FALSE
Potri.001G094600	0.55	0.0004	TRUE
Potri.001G094700	0.15	0.7	FALSE
Potri.001G094800	0.2	0.63	FALSE
Potri.001G094900	0.23	0.12	FALSE
Potri.001G095000	NA	NA	NA
Potri.001G095100	NA	NA	NA
Potri.001G095200	0.34	0.064	FALSE
Potri.001G095300	-0.14	0.37	FALSE
Potri.001G095400	-1.2	0.42	FALSE
Potri.001G095500	-0.29	0.0084	TRUE
Potri.001G095600	0.035	0.92	FALSE
Potri.001G095700	0	NA	NA
Potri.001G095800	0.72	9.3e-11	TRUE
Potri.001G095900	0	NA	NA
Potri.001G096000	0.05	0.97	FALSE
Potri.001G096100	0.18	0.12	FALSE
Potri.001G096200	0.58	0.015	TRUE
Potri.001G096300	0.83	0.57	FALSE
Potri.001G096400	-1.3	3.6e-09	TRUE
Potri.001G096500	2.8	8.9e-12	TRUE
Potri.001G096600	1	0.31	FALSE
Potri.001G096700	0.55	0.42	FALSE
Potri.001G096800	0.51	0.51	FALSE
Potri.001G096900	1.2	1e-06	TRUE
Potri.001G097000	NA	NA	NA
Potri.001G097100	2.9	0.057	FALSE
Potri.001G097200	-0.029	0.91	FALSE
Potri.001G097300	-0.31	0.52	FALSE
Potri.001G097400	0.41	1.6e-05	TRUE
Potri.001G097500	-0.069	0.65	FALSE
Potri.001G097600	-0.71	0.034	TRUE
Potri.001G097700	-1.3	1.8e-25	TRUE
Potri.001G097800	0.1	0.62	FALSE
Potri.001G097900	1.7	0.36	FALSE
Potri.001G098000	-1.1	0.08	FALSE
Potri.001G098100	-1.3	0.00019	TRUE
Potri.001G098200	1.4	0.032	TRUE
Potri.001G098300	-0.28	0.15	FALSE
Potri.001G098400	-0.035	0.97	FALSE
Potri.001G098500	-0.025	0.84	FALSE
Potri.001G098600	0.16	0.062	FALSE
Potri.001G098700	-0.00045	1	FALSE
Potri.001G098800	1.7	9e-16	TRUE
Potri.001G098900	-1	0.34	FALSE
Potri.001G099000	-5	6.3e-11	TRUE
Potri.001G099100	0.061	0.95	FALSE
Potri.001G099200	-0.32	0.0041	TRUE
Potri.001G099300	0.2	0.28	FALSE
Potri.001G099400	-1	0.023	TRUE
Potri.001G099500	0.98	0.38	FALSE
Potri.001G099600	0.094	0.44	FALSE
Potri.001G099700	-0.34	0.18	FALSE
Potri.001G099800	-0.075	0.9	FALSE
Potri.001G099900	-0.057	0.84	FALSE
Potri.001G100000	0.47	0.061	FALSE
Potri.001G100100	0.47	0.05	FALSE
Potri.001G100200	-2.8	1.8e-05	TRUE
Potri.001G100300	0.32	0.051	FALSE
Potri.001G100400	0	NA	NA
Potri.001G100500	0.3	0.31	FALSE
Potri.001G100600	0.39	0.097	FALSE
Potri.001G100700	0.13	0.58	FALSE
Potri.001G100800	0.52	0.0043	TRUE
Potri.001G100900	0.23	0.32	FALSE
Potri.001G101000	-0.13	0.78	FALSE
Potri.001G101100	0.72	4.8e-10	TRUE
Potri.001G101200	-0.24	0.92	FALSE
Potri.001G101300	-0.084	0.19	FALSE
Potri.001G101400	-0.15	0.22	FALSE
Potri.001G101500	0.82	0.12	FALSE
Potri.001G101600	0.47	0.011	TRUE
Potri.001G101700	-0.24	0.23	FALSE
Potri.001G101800	-0.24	0.15	FALSE
Potri.001G101900	0.11	0.48	FALSE
Potri.001G102000	0.0045	1	FALSE
Potri.001G102100	-0.084	0.62	FALSE
Potri.001G102200	-0.59	0.0044	TRUE
Potri.001G102300	-0.18	0.76	FALSE
Potri.001G102400	0.16	0.86	FALSE
Potri.001G102500	0.2	0.6	FALSE
Potri.001G102600	0.62	0.024	TRUE
Potri.001G102700	-1.5	NA	NA
Potri.001G102800	NA	NA	NA
Potri.001G102900	0.34	0.0068	TRUE
Potri.001G103000	-1.2	0.63	FALSE
Potri.001G103100	0.29	0.15	FALSE
Potri.001G103200	1.1	0.49	FALSE
Potri.001G103300	0.77	2.9e-06	TRUE
Potri.001G103400	-2.1	1.9e-15	TRUE
Potri.001G103500	0	NA	NA
Potri.001G103600	-0.84	5.5e-05	TRUE
Potri.001G103700	-1.5	7.7e-09	TRUE
Potri.001G103800	0.21	0.096	FALSE
Potri.001G103900	-0.084	NA	NA
Potri.001G104000	-0.74	8e-13	TRUE
Potri.001G104100	0	NA	NA
Potri.001G104200	-0.025	0.95	FALSE
Potri.001G104300	-0.11	0.27	FALSE
Potri.001G104400	-1.6	1.4e-24	TRUE
Potri.001G104500	-0.12	0.49	FALSE
Potri.001G104600	0.052	0.92	FALSE
Potri.001G104700	-0.085	0.52	FALSE
Potri.001G104800	0.44	0.0061	TRUE
Potri.001G104900	0.15	0.52	FALSE
Potri.001G105000	-0.28	0.84	FALSE
Potri.001G105100	0.31	0.016	TRUE
Potri.001G105200	-1.6	2.9e-12	TRUE
Potri.001G105300	-2.6	0.4	FALSE
Potri.001G105400	-0.19	0.8	FALSE
Potri.001G105500	0	NA	NA
Potri.001G105600	0.38	0.00023	TRUE
Potri.001G105700	-1.4	NA	NA
Potri.001G105800	0.11	0.82	FALSE
Potri.001G105900	-1.5	2e-16	TRUE
Potri.001G106000	-0.16	0.17	FALSE
Potri.001G106100	0.61	0.071	FALSE
Potri.001G106200	1.7	0.51	FALSE
Potri.001G106300	-0.82	0.75	FALSE
Potri.001G106400	0.81	0.8	FALSE
Potri.001G106500	-4	0.16	FALSE
Potri.001G106600	0.62	0.00029	TRUE
Potri.001G106700	0.55	0.12	FALSE
Potri.001G106800	-2.1	9.4e-05	TRUE
Potri.001G106900	-3.2	0.28	FALSE
Potri.001G107000	0.35	0.16	FALSE
Potri.001G107100	0.5	0.54	FALSE
Potri.001G107200	0.099	0.64	FALSE
Potri.001G107300	0.24	0.057	FALSE
Potri.001G107400	-0.59	0.19	FALSE
Potri.001G107500	0.49	4.4e-11	TRUE
Potri.001G107600	5.4	5e-99	TRUE
Potri.001G107700	NA	NA	NA
Potri.001G107800	3.1	0.025	TRUE
Potri.001G107900	-0.21	NA	NA
Potri.001G108000	NA	NA	NA
Potri.001G108100	0.88	2.3e-06	TRUE
Potri.001G108200	0.73	1.4e-08	TRUE
Potri.001G108300	2.2	4.2e-18	TRUE
Potri.001G108400	0.05	0.71	FALSE
Potri.001G108500	5.4	NA	NA
Potri.001G108600	1.2	0.16	FALSE
Potri.001G108700	0.13	0.54	FALSE
Potri.001G108800	-0.32	0.42	FALSE
Potri.001G108900	-4.2	0.13	FALSE
Potri.001G109000	2.9	6.5e-10	TRUE
Potri.001G109100	0.21	0.93	FALSE
Potri.001G109200	0.23	0.022	TRUE
Potri.001G109300	-1.5	NA	NA
Potri.001G109400	0.33	0.34	FALSE
Potri.001G109500	-0.23	1.7e-05	TRUE
Potri.001G109600	-0.23	0.28	FALSE
Potri.001G109700	0.67	0.12	FALSE
Potri.001G109800	-0.41	0.099	FALSE
Potri.001G109900	-1.2	0.14	FALSE
Potri.001G110000	0.035	0.8	FALSE
Potri.001G110100	0.42	0.0004	TRUE
Potri.001G110200	0.75	1.2e-11	TRUE
Potri.001G110300	2	1.4e-09	TRUE
Potri.001G110400	-0.17	0.9	FALSE
Potri.001G110500	-4.8	0.013	TRUE
Potri.001G110600	NA	NA	NA
Potri.001G110700	-3.5	6.8e-05	TRUE
Potri.001G110800	-2.6	0.01	TRUE
Potri.001G110900	0.59	0.14	FALSE
Potri.001G111000	-0.099	0.48	FALSE
Potri.001G111100	-0.17	0.031	TRUE
Potri.001G111200	-0.54	0.8	FALSE
Potri.001G111300	0.96	4.2e-06	TRUE
Potri.001G111400	-0.89	3.1e-06	TRUE
Potri.001G111500	-0.044	0.95	FALSE
Potri.001G111600	0.97	5.4e-06	TRUE
Potri.001G111700	0.13	0.51	FALSE
Potri.001G111800	0.024	0.87	FALSE
Potri.001G111900	1.9	NA	NA
Potri.001G112000	0.31	0.012	TRUE
Potri.001G112100	-0.97	0.008	TRUE
Potri.001G112200	0.58	1.5e-06	TRUE
Potri.001G112300	-0.17	0.031	TRUE
Potri.001G112400	-0.51	0.032	TRUE
Potri.001G112500	-0.38	0.6	FALSE
Potri.001G112600	0.54	0.035	TRUE
Potri.001G112700	-0.073	0.44	FALSE
Potri.001G112800	0.74	0.35	FALSE
Potri.001G112900	-1.5	0.31	FALSE
Potri.001G113000	0.74	0.61	FALSE
Potri.001G113100	-1.4	0.00013	TRUE
Potri.001G113200	-0.01	0.97	FALSE
Potri.001G113300	0.039	0.83	FALSE
Potri.001G113400	2.4	0.11	FALSE
Potri.001G113500	0.3	0.00085	TRUE
Potri.001G113600	-0.45	1.9e-09	TRUE
Potri.001G113700	NA	NA	NA
Potri.001G113800	0.23	0.053	FALSE
Potri.001G113900	-3.7	1.3e-14	TRUE
Potri.001G114000	0.61	0.33	FALSE
Potri.001G114100	1.8	5.9e-19	TRUE
Potri.001G114200	-0.36	0.87	FALSE
Potri.001G114300	0.057	0.95	FALSE
Potri.001G114400	0.083	0.69	FALSE
Potri.001G114500	0.58	0.023	TRUE
Potri.001G114600	0.65	4.2e-06	TRUE
Potri.001G114700	4.3	9.1e-05	TRUE
Potri.001G114800	0.016	0.95	FALSE
Potri.001G114900	-0.06	0.95	FALSE
Potri.001G115000	-0.67	3.7e-06	TRUE
Potri.001G115100	0.35	0.12	FALSE
Potri.001G115200	-0.027	0.97	FALSE
Potri.001G115300	0	NA	NA
Potri.001G115400	3.8	0.054	FALSE
Potri.001G115500	0.71	6.9e-16	TRUE
Potri.001G115600	-0.37	0.029	TRUE
Potri.001G115700	NA	NA	NA
Potri.001G115800	-1.2	2.5e-07	TRUE
Potri.001G115900	0.037	0.81	FALSE
Potri.001G116000	0.0025	1	FALSE
Potri.001G116100	-0.49	0.00086	TRUE
Potri.001G116200	-2	0.35	FALSE
Potri.001G116300	-1	0.2	FALSE
Potri.001G116400	-2.2	0.081	FALSE
Potri.001G116500	-0.89	2e-06	TRUE
Potri.001G116600	0.32	0.23	FALSE
Potri.001G116700	0.29	0.37	FALSE
Potri.001G116800	-0.3	0.36	FALSE
Potri.001G116900	0.33	9e-05	TRUE
Potri.001G117000	1	7.3e-07	TRUE
Potri.001G117100	-0.085	0.66	FALSE
Potri.001G117200	-0.24	0.00033	TRUE
Potri.001G117300	NA	NA	NA
Potri.001G117400	-0.31	2.2e-05	TRUE
Potri.001G117500	0.29	0.057	FALSE
Potri.001G117600	-1.2	0.00018	TRUE
Potri.001G117700	0.46	3.6e-06	TRUE
Potri.001G117800	0.99	1.6e-07	TRUE
Potri.001G117900	0.12	0.41	FALSE
Potri.001G118000	-0.15	0.15	FALSE
Potri.001G118100	0.27	0.1	FALSE
Potri.001G118200	1.3	6.7e-07	TRUE
Potri.001G118300	-0.021	0.96	FALSE
Potri.001G118400	1.7	1.7e-05	TRUE
Potri.001G118500	0.54	0.026	TRUE
Potri.001G118600	-0.78	NA	NA
Potri.001G118700	0.057	0.58	FALSE
Potri.001G118800	-0.25	0.67	FALSE
Potri.001G118900	0.16	0.12	FALSE
Potri.001G119000	-3.6	1.3e-23	TRUE
Potri.001G119100	0.56	0.00049	TRUE
Potri.001G119200	0.046	NA	NA
Potri.001G119300	1.3	0.0012	TRUE
Potri.001G119400	NA	NA	NA
Potri.001G119500	0.64	6.8e-07	TRUE
Potri.001G119600	NA	NA	NA
Potri.001G119700	-0.14	0.3	FALSE
Potri.001G119800	0.53	0.013	TRUE
Potri.001G119900	-0.18	0.77	FALSE
Potri.001G120000	0.39	0.24	FALSE
Potri.001G120100	3.1	NA	NA
Potri.001G120200	0.097	0.94	FALSE
Potri.001G120300	0.5	0.035	TRUE
Potri.001G120400	0.53	4.1e-15	TRUE
Potri.001G120500	-0.12	0.71	FALSE
Potri.001G120600	-1.9	0.12	FALSE
Potri.001G120700	-0.075	0.94	FALSE
Potri.001G120800	0.39	0.0055	TRUE
Potri.001G120900	0.42	1.5e-06	TRUE
Potri.001G121000	0.39	0.024	TRUE
Potri.001G121100	0.035	0.89	FALSE
Potri.001G121200	0.6	1.8e-07	TRUE
Potri.001G121300	0.58	0.024	TRUE
Potri.001G121400	0.82	0.0014	TRUE
Potri.001G121500	NA	NA	NA
Potri.001G121600	0.3	0.44	FALSE
Potri.001G121700	1.1	1.7e-10	TRUE
Potri.001G121800	1.5	0.31	FALSE
Potri.001G121900	-1.4	0.047	TRUE
Potri.001G122000	NA	NA	NA
Potri.001G122100	0	1	FALSE
Potri.001G122200	0.4	0.033	TRUE
Potri.001G122300	-4	NA	NA
Potri.001G122400	0.8	0.00079	TRUE
Potri.001G122500	-0.61	0.014	TRUE
Potri.001G122600	0.013	1	FALSE
Potri.001G122700	-0.091	0.54	FALSE
Potri.001G122800	0.045	0.81	FALSE
Potri.001G122900	NA	NA	NA
Potri.001G123000	-0.15	0.71	FALSE
Potri.001G123100	0.75	0.0036	TRUE
Potri.001G123200	0.01	0.93	FALSE
Potri.001G123300	-0.19	0.96	FALSE
Potri.001G123400	-0.41	0.0017	TRUE
Potri.001G123500	-0.027	0.84	FALSE
Potri.001G123600	-0.074	0.66	FALSE
Potri.001G123700	0.22	0.3	FALSE
Potri.001G123800	1.7	1.4e-27	TRUE
Potri.001G123900	3.2	0.34	FALSE
Potri.001G124000	-0.18	0.079	FALSE
Potri.001G124100	-0.11	0.52	FALSE
Potri.001G124200	3.1	1.7e-75	TRUE
Potri.001G124300	0.29	7.8e-05	TRUE
Potri.001G124400	0.29	0.54	FALSE
Potri.001G124500	0.36	0.00037	TRUE
Potri.001G124600	NA	NA	NA
Potri.001G124700	1.3	0.02	TRUE
Potri.001G124800	NA	NA	NA
Potri.001G124900	0.58	2.7e-09	TRUE
Potri.001G125000	-0.64	0.049	TRUE
Potri.001G125100	-1.3	0.089	FALSE
Potri.001G125200	-0.045	0.84	FALSE
Potri.001G125300	0	NA	NA
Potri.001G125400	0	1	FALSE
Potri.001G125500	-1.6	0.68	FALSE
Potri.001G125600	-3.5	NA	NA
Potri.001G125700	-0.051	0.74	FALSE
Potri.001G125800	0.39	0.0051	TRUE
Potri.001G125900	1.8	NA	NA
Potri.001G126000	0	1	FALSE
Potri.001G126100	0.11	0.77	FALSE
Potri.001G126200	0.21	0.21	FALSE
Potri.001G126300	-1.1	0.068	FALSE
Potri.001G126400	-0.3	0.0095	TRUE
Potri.001G126500	0.013	0.92	FALSE
Potri.001G126600	NA	NA	NA
Potri.001G126700	-1.7	0.00049	TRUE
Potri.001G126800	4.6	0.0012	TRUE
Potri.001G126900	NA	NA	NA
Potri.001G127000	0.46	0.09	FALSE
Potri.001G127100	0.45	0.028	TRUE
Potri.001G127200	-0.71	0.81	FALSE
Potri.001G127300	0.31	0.12	FALSE
Potri.001G127400	3.2	0.34	FALSE
Potri.001G127500	0.85	0.77	FALSE
Potri.001G127600	1.4	0.00013	TRUE
Potri.001G127700	1	0.18	FALSE
Potri.001G127800	-1.6	0.66	FALSE
Potri.001G127900	0.12	0.94	FALSE
Potri.001G128000	0	NA	NA
Potri.001G128100	0.55	0.35	FALSE
Potri.001G128200	-0.81	8.3e-06	TRUE
Potri.001G128300	-0.72	0.34	FALSE
Potri.001G128400	1.5	0.065	FALSE
Potri.001G128500	-2.6	0.39	FALSE
Potri.001G128600	0.064	0.84	FALSE
Potri.001G128700	-0.0031	0.99	FALSE
Potri.001G128800	-0.11	0.31	FALSE
Potri.001G128900	NA	NA	NA
Potri.001G129000	0.56	0.0013	TRUE
Potri.001G129100	-0.011	0.95	FALSE
Potri.001G129200	0	NA	NA
Potri.001G129300	NA	NA	NA
Potri.001G129400	-0.53	0.33	FALSE
Potri.001G129500	0.077	0.72	FALSE
Potri.001G129600	-0.16	0.081	FALSE
Potri.001G129700	0.23	0.11	FALSE
Potri.001G129800	-0.46	8.4e-05	TRUE
Potri.001G129900	-0.64	1.4e-11	TRUE
Potri.001G130000	-2	0.21	FALSE
Potri.001G130100	0.82	0.00014	TRUE
Potri.001G130200	-0.028	0.94	FALSE
Potri.001G130300	NA	NA	NA
Potri.001G130400	0.2	0.33	FALSE
Potri.001G130500	0.48	9.1e-07	TRUE
Potri.001G130600	-0.43	0.13	FALSE
Potri.001G130700	-0.059	0.85	FALSE
Potri.001G130800	-0.27	0.56	FALSE
Potri.001G130900	0.19	0.16	FALSE
Potri.001G131000	0.036	0.84	FALSE
Potri.001G131100	0.86	NA	NA
Potri.001G131200	NA	NA	NA
Potri.001G131300	-0.052	0.78	FALSE
Potri.001G131400	0.5	0.0017	TRUE
Potri.001G131500	0.17	0.64	FALSE
Potri.001G131600	0.64	0.1	FALSE
Potri.001G131700	1.3	0.014	TRUE
Potri.001G131800	0.065	0.85	FALSE
Potri.001G131900	NA	NA	NA
Potri.001G132000	0.45	0.017	TRUE
Potri.001G132100	-1	0.17	FALSE
Potri.001G132200	-0.11	0.98	FALSE
Potri.001G132300	NA	NA	NA
Potri.001G132400	0.35	0.0015	TRUE
Potri.001G132500	-0.023	0.97	FALSE
Potri.001G132600	-0.027	0.87	FALSE
Potri.001G132700	0.17	0.032	TRUE
Potri.001G132800	-1.4	5.1e-29	TRUE
Potri.001G132900	-0.31	0.0015	TRUE
Potri.001G133000	-1.6	1.4e-11	TRUE
Potri.001G133100	0.29	0.6	FALSE
Potri.001G133200	1.1	4.7e-05	TRUE
Potri.001G133300	-2	0.00065	TRUE
Potri.001G133400	-0.58	0.014	TRUE
Potri.001G133500	-0.41	0.0081	TRUE
Potri.001G133600	0.21	0.16	FALSE
Potri.001G133700	3.4	NA	NA
Potri.001G133800	0.92	0.00027	TRUE
Potri.001G133900	0.075	0.8	FALSE
Potri.001G134000	-0.032	0.96	FALSE
Potri.001G134100	0.13	0.32	FALSE
Potri.001G134200	NA	NA	NA
Potri.001G134300	0.61	0.23	FALSE
Potri.001G134400	-0.19	0.92	FALSE
Potri.001G134500	1.6	2.6e-08	TRUE
Potri.001G134600	0.73	0.63	FALSE
Potri.001G134700	-0.78	0.1	FALSE
Potri.001G134800	-0.33	0.02	TRUE
Potri.001G134900	0.34	0.62	FALSE
Potri.001G135000	-0.056	0.64	FALSE
Potri.001G135100	0.33	0.33	FALSE
Potri.001G135200	-0.18	0.0032	TRUE
Potri.001G135300	0.32	0.015	TRUE
Potri.001G135400	0.72	1.2e-07	TRUE
Potri.001G135500	0.18	0.26	FALSE
Potri.001G135600	NA	NA	NA
Potri.001G135700	0.29	0.00062	TRUE
Potri.001G135800	-0.0075	0.99	FALSE
Potri.001G135900	0.13	0.49	FALSE
Potri.001G136000	0.7	0.16	FALSE
Potri.001G136100	-3.3	3.7e-20	TRUE
Potri.001G136200	-1.8	3e-12	TRUE
Potri.001G136300	-0.057	0.64	FALSE
Potri.001G136400	0.23	0.55	FALSE
Potri.001G136500	0.92	0.057	FALSE
Potri.001G136600	0.4	0.079	FALSE
Potri.001G136700	0	NA	NA
Potri.001G136800	0.00052	1	FALSE
Potri.001G136900	0.31	0.028	TRUE
Potri.001G137000	0.21	0.085	FALSE
Potri.001G137100	-0.75	0.24	FALSE
Potri.001G137200	0.085	0.47	FALSE
Potri.001G137300	NA	NA	NA
Potri.001G137400	-0.16	0.95	FALSE
Potri.001G137500	0.26	0.23	FALSE
Potri.001G137600	-0.19	0.33	FALSE
Potri.001G137700	-0.48	0.053	FALSE
Potri.001G137800	0.53	0.18	FALSE
Potri.001G137900	0.35	0.00018	TRUE
Potri.001G138000	-1.9	1.2e-07	TRUE
Potri.001G138100	-0.26	0.16	FALSE
Potri.001G138200	0.4	0.48	FALSE
Potri.001G138300	-0.077	0.82	FALSE
Potri.001G138400	-0.13	0.29	FALSE
Potri.001G138500	-0.72	5.1e-17	TRUE
Potri.001G138600	4.2	NA	NA
Potri.001G138700	-0.7	0.00038	TRUE
Potri.001G138800	0.18	0.66	FALSE
Potri.001G138900	-0.3	0.002	TRUE
Potri.001G139000	0	NA	NA
Potri.001G139100	0.081	0.72	FALSE
Potri.001G139200	-0.035	0.9	FALSE
Potri.001G139300	-0.1	0.67	FALSE
Potri.001G139400	-0.14	0.33	FALSE
Potri.001G139500	-0.4	0.025	TRUE
Potri.001G139600	-0.69	0.14	FALSE
Potri.001G139700	-0.028	0.96	FALSE
Potri.001G139800	-0.051	0.57	FALSE
Potri.001G139900	-1.6	0.062	FALSE
Potri.001G140000	-1.1	0.00062	TRUE
Potri.001G140100	NA	NA	NA
Potri.001G140200	-0.074	0.82	FALSE
Potri.001G140300	-0.11	0.32	FALSE
Potri.001G140400	-1.7	0.23	FALSE
Potri.001G140500	0.49	0.0033	TRUE
Potri.001G140600	0.3	0.00021	TRUE
Potri.001G140700	-0.62	0.015	TRUE
Potri.001G140800	0.17	0.11	FALSE
Potri.001G140900	0.49	0.48	FALSE
Potri.001G141000	NA	NA	NA
Potri.001G141100	0.87	0.0022	TRUE
Potri.001G141200	0.3	0.18	FALSE
Potri.001G141300	0.51	0.0035	TRUE
Potri.001G141400	-0.0095	0.99	FALSE
Potri.001G141500	-0.35	0.11	FALSE
Potri.001G141600	0.063	0.82	FALSE
Potri.001G141700	0.87	0.0064	TRUE
Potri.001G141800	1.7	2.3e-06	TRUE
Potri.001G141900	-2.3	0.041	TRUE
Potri.001G142000	0.25	0.52	FALSE
Potri.001G142100	-0.36	1.3e-07	TRUE
Potri.001G142200	-0.52	0.028	TRUE
Potri.001G142300	-0.48	0.0054	TRUE
Potri.001G142400	-0.69	0.0015	TRUE
Potri.001G142500	0.099	0.67	FALSE
Potri.001G142600	-0.53	0.0012	TRUE
Potri.001G142700	-1.4	0.033	TRUE
Potri.001G142800	-3.2	2.5e-06	TRUE
Potri.001G142900	1.1	NA	NA
Potri.001G143000	NA	NA	NA
Potri.001G143100	NA	NA	NA
Potri.001G143200	0.11	0.39	FALSE
Potri.001G143300	NA	NA	NA
Potri.001G143400	0.59	5.1e-06	TRUE
Potri.001G143500	-0.091	0.62	FALSE
Potri.001G143600	-0.13	0.26	FALSE
Potri.001G143700	-4.3	0.058	FALSE
Potri.001G143800	-0.24	0.018	TRUE
Potri.001G143900	1.3	2.5e-07	TRUE
Potri.001G144000	-0.091	0.43	FALSE
Potri.001G144100	0.052	0.88	FALSE
Potri.001G144200	0.14	0.45	FALSE
Potri.001G144300	0.1	0.76	FALSE
Potri.001G144400	0.11	0.81	FALSE
Potri.001G144500	0.21	0.014	TRUE
Potri.001G144600	0.15	NA	NA
Potri.001G144700	-0.48	0.0004	TRUE
Potri.001G144800	0.72	0.0031	TRUE
Potri.001G144900	1.7	NA	NA
Potri.001G145000	1.2	NA	NA
Potri.001G145100	0.087	0.76	FALSE
Potri.001G145200	-0.75	0.0056	TRUE
Potri.001G145300	0.97	4.5e-08	TRUE
Potri.001G145400	0.34	0.0037	TRUE
Potri.001G145500	-0.036	0.81	FALSE
Potri.001G145600	NA	NA	NA
Potri.001G145700	-0.72	0.011	TRUE
Potri.001G145800	1.1	0.00075	TRUE
Potri.001G145900	0.15	0.68	FALSE
Potri.001G146000	-0.36	0.25	FALSE
Potri.001G146100	0.03	0.82	FALSE
Potri.001G146200	0.18	0.65	FALSE
Potri.001G146300	-1.4	NA	NA
Potri.001G146400	0.11	0.35	FALSE
Potri.001G146500	0.24	0.021	TRUE
Potri.001G146600	-0.42	0.057	FALSE
Potri.001G146700	0.58	0.0012	TRUE
Potri.001G146800	0.39	0.081	FALSE
Potri.001G146900	0.29	0.0041	TRUE
Potri.001G147000	-0.55	9.5e-07	TRUE
Potri.001G147100	-0.29	0.69	FALSE
Potri.001G147200	0.16	0.79	FALSE
Potri.001G147300	1.4	2.6e-08	TRUE
Potri.001G147400	0.042	0.91	FALSE
Potri.001G147500	0.25	0.31	FALSE
Potri.001G147600	0.13	0.78	FALSE
Potri.001G147700	0.38	0.16	FALSE
Potri.001G147800	0	NA	NA
Potri.001G147900	3.4	NA	NA
Potri.001G148000	0.11	0.31	FALSE
Potri.001G148100	-0.4	0.00069	TRUE
Potri.001G148200	0.036	0.95	FALSE
Potri.001G148300	-0.39	0.0038	TRUE
Potri.001G148400	-1	3.5e-07	TRUE
Potri.001G148500	-0.72	4.9e-05	TRUE
Potri.001G148600	0.16	0.44	FALSE
Potri.001G148700	0.56	3.5e-07	TRUE
Potri.001G148800	0.41	0.04	TRUE
Potri.001G148900	-0.48	0.32	FALSE
Potri.001G149000	-2.2	NA	NA
Potri.001G149100	-2.1	1.4e-17	TRUE
Potri.001G149200	-0.57	5.7e-05	TRUE
Potri.001G149300	0.21	0.29	FALSE
Potri.001G149400	0.39	0.19	FALSE
Potri.001G149500	-1.5	NA	NA
Potri.001G149600	0.18	0.033	TRUE
Potri.001G149700	0.039	0.93	FALSE
Potri.001G149800	-0.11	0.46	FALSE
Potri.001G149900	-0.2	0.0017	TRUE
Potri.001G150000	-0.91	NA	NA
Potri.001G150100	NA	NA	NA
Potri.001G150200	-1.1	1.9e-13	TRUE
Potri.001G150300	0.042	0.82	FALSE
Potri.001G150400	-0.26	0.033	TRUE
Potri.001G150500	0.16	0.29	FALSE
Potri.001G150600	0.29	0.035	TRUE
Potri.001G150700	5	2.9e-09	TRUE
Potri.001G150800	0.22	0.79	FALSE
Potri.001G150900	-0.29	0.027	TRUE
Potri.001G151000	NA	NA	NA
Potri.001G151100	-1.7	0.051	FALSE
Potri.001G151200	1	0.35	FALSE
Potri.001G151300	0.6	3.7e-08	TRUE
Potri.001G151400	-0.85	0.14	FALSE
Potri.001G151500	-5.8	7.6e-05	TRUE
Potri.001G151600	0.81	0.54	FALSE
Potri.001G151700	-0.72	1.2e-15	TRUE
Potri.001G151800	-0.62	0.00039	TRUE
Potri.001G151900	0.21	0.59	FALSE
Potri.001G152000	0.22	0.0089	TRUE
Potri.001G152100	-0.58	7.2e-12	TRUE
Potri.001G152200	0.35	4.4e-06	TRUE
Potri.001G152300	-1.8	0.00033	TRUE
Potri.001G152400	NA	NA	NA
Potri.001G152500	-0.81	0.013	TRUE
Potri.001G152600	0.24	0.21	FALSE
Potri.001G152700	0.28	0.034	TRUE
Potri.001G152800	-0.25	0.029	TRUE
Potri.001G152900	1.3	NA	NA
Potri.001G153000	0.12	0.23	FALSE
Potri.001G153100	-0.79	0.43	FALSE
Potri.001G153200	-4.6	0.3	FALSE
Potri.001G153300	0.66	1e-05	TRUE
Potri.001G153400	0.39	0.01	TRUE
Potri.001G153500	NA	NA	NA
Potri.001G153600	NA	NA	NA
Potri.001G153700	0	NA	NA
Potri.001G153800	-5.4	4.4e-22	TRUE
Potri.001G153900	-0.18	0.68	FALSE
Potri.001G154000	0.17	0.84	FALSE
Potri.001G154100	-2.4	1.3e-06	TRUE
Potri.001G154200	1.1	0.15	FALSE
Potri.001G154300	0.47	0.033	TRUE
Potri.001G154400	0.047	0.76	FALSE
Potri.001G154500	0.51	0.05	FALSE
Potri.001G154600	-0.052	0.78	FALSE
Potri.001G154700	-0.14	0.19	FALSE
Potri.001G154800	0.5	0.45	FALSE
Potri.001G154900	-0.076	0.69	FALSE
Potri.001G155000	-0.076	0.83	FALSE
Potri.001G155100	-0.64	5.6e-07	TRUE
Potri.001G155200	-0.11	0.37	FALSE
Potri.001G155300	-0.23	0.16	FALSE
Potri.001G155400	-1.4	NA	NA
Potri.001G155500	0.85	0.00085	TRUE
Potri.001G155600	1.4	NA	NA
Potri.001G155700	0.66	0.017	TRUE
Potri.001G155800	-0.6	1.2e-07	TRUE
Potri.001G155900	0.27	0.0097	TRUE
Potri.001G156000	-0.32	0.024	TRUE
Potri.001G156100	-0.15	0.45	FALSE
Potri.001G156200	-1.5	0.00012	TRUE
Potri.001G156300	0.55	0.27	FALSE
Potri.001G156400	0.67	0.14	FALSE
Potri.001G156500	-0.07	0.7	FALSE
Potri.001G156600	0.14	0.55	FALSE
Potri.001G156700	-3.3	4e-13	TRUE
Potri.001G156800	NA	NA	NA
Potri.001G156900	-0.25	0.91	FALSE
Potri.001G157000	-0.4	0.53	FALSE
Potri.001G157100	0	1	FALSE
Potri.001G157200	-0.006	1	FALSE
Potri.001G157300	-0.35	0.0047	TRUE
Potri.001G157400	-0.013	0.95	FALSE
Potri.001G157500	-0.11	0.82	FALSE
Potri.001G157600	-0.96	3.2e-06	TRUE
Potri.001G157700	-0.36	0.15	FALSE
Potri.001G157800	-0.25	0.02	TRUE
Potri.001G157900	0.24	0.024	TRUE
Potri.001G158000	0.061	0.77	FALSE
Potri.001G158100	0.18	0.67	FALSE
Potri.001G158200	0.045	0.68	FALSE
Potri.001G158300	0	NA	NA
Potri.001G158400	-0.066	0.97	FALSE
Potri.001G158500	-0.061	NA	NA
Potri.001G158600	-2.2	1.7e-05	TRUE
Potri.001G158700	-0.39	0.32	FALSE
Potri.001G158800	-0.53	0.2	FALSE
Potri.001G158900	-1	1e-17	TRUE
Potri.001G159000	0.063	0.68	FALSE
Potri.001G159100	0	NA	NA
Potri.001G159200	4.6	0.021	TRUE
Potri.001G159300	0.064	0.94	FALSE
Potri.001G159400	0.43	0.00057	TRUE
Potri.001G159500	NA	NA	NA
Potri.001G159600	0.71	3.2e-07	TRUE
Potri.001G159700	0.17	0.12	FALSE
Potri.001G159800	1.1	NA	NA
Potri.001G159900	0.61	0.18	FALSE
Potri.001G160000	0	NA	NA
Potri.001G160100	-1	6.4e-09	TRUE
Potri.001G160200	-1.8	0.005	TRUE
Potri.001G160300	0.29	0.0019	TRUE
Potri.001G160400	-0.78	0.049	TRUE
Potri.001G160500	0.13	0.31	FALSE
Potri.001G160600	0.024	0.93	FALSE
Potri.001G160700	0.019	0.88	FALSE
Potri.001G160800	-0.33	0.07	FALSE
Potri.001G160900	-1.8	0.17	FALSE
Potri.001G161000	-0.23	0.16	FALSE
Potri.001G161100	0.28	0.021	TRUE
Potri.001G161200	-1.2	0.45	FALSE
Potri.001G161300	NA	NA	NA
Potri.001G161400	0.007	0.99	FALSE
Potri.001G161500	1.7	0.0022	TRUE
Potri.001G161600	0.23	0.078	FALSE
Potri.001G161700	0.31	0.00039	TRUE
Potri.001G161800	0.1	0.57	FALSE
Potri.001G161900	0.067	0.63	FALSE
Potri.001G162000	-4.3	4e-43	TRUE
Potri.001G162100	-0.64	0.17	FALSE
Potri.001G162200	-0.058	0.64	FALSE
Potri.001G162300	-0.22	0.91	FALSE
Potri.001G162400	0.13	0.59	FALSE
Potri.001G162500	0.52	0.022	TRUE
Potri.001G162600	0.36	0.2	FALSE
Potri.001G162700	-0.054	0.94	FALSE
Potri.001G162800	-0.038	0.95	FALSE
Potri.001G162900	0.11	0.3	FALSE
Potri.001G163000	0.54	0.43	FALSE
Potri.001G163100	1.7	3.6e-31	TRUE
Potri.001G163200	-0.072	0.69	FALSE
Potri.001G163300	-0.056	0.77	FALSE
Potri.001G163400	0.095	0.91	FALSE
Potri.001G163500	-0.68	0.37	FALSE
Potri.001G163600	0.43	0.21	FALSE
Potri.001G163700	-0.2	0.3	FALSE
Potri.001G163800	0.33	0.52	FALSE
Potri.001G163900	0.92	5.4e-12	TRUE
Potri.001G164000	0.008	0.97	FALSE
Potri.001G164100	0.22	0.058	FALSE
Potri.001G164200	2	NA	NA
Potri.001G164300	0.31	0.36	FALSE
Potri.001G164400	-1.4	NA	NA
Potri.001G164500	3.4	NA	NA
Potri.001G164600	-1.5	NA	NA
Potri.001G164700	0.46	0.056	FALSE
Potri.001G164800	0.85	0.0044	TRUE
Potri.001G164900	0.44	0.024	TRUE
Potri.001G165000	-1.2	0.22	FALSE
Potri.001G165100	-0.27	0.72	FALSE
Potri.001G165200	0	1	FALSE
Potri.001G165300	-1.2	0.67	FALSE
Potri.001G165400	0.96	0.48	FALSE
Potri.001G165500	0.93	0.72	FALSE
Potri.001G165600	0.0061	0.97	FALSE
Potri.001G165700	NA	NA	NA
Potri.001G165800	-0.2	0.14	FALSE
Potri.001G165900	-0.11	0.27	FALSE
Potri.001G166000	0.27	0.097	FALSE
Potri.001G166100	0.014	0.87	FALSE
Potri.001G166200	-4	1e-20	TRUE
Potri.001G166300	3.3	NA	NA
Potri.001G166400	0.051	0.62	FALSE
Potri.001G166500	0.99	5.4e-08	TRUE
Potri.001G166600	0.071	0.63	FALSE
Potri.001G166700	0	1	FALSE
Potri.001G166800	-0.32	0.23	FALSE
Potri.001G166900	0.44	0.039	TRUE
Potri.001G167000	-1.4	NA	NA
Potri.001G167100	-0.63	0.027	TRUE
Potri.001G167200	-0.45	0.002	TRUE
Potri.001G167300	0.69	0.00088	TRUE
Potri.001G167400	0.075	0.76	FALSE
Potri.001G167500	NA	NA	NA
Potri.001G167600	0.77	0.21	FALSE
Potri.001G167700	-1.5	4.5e-05	TRUE
Potri.001G167800	0.79	0.032	TRUE
Potri.001G167900	-0.055	0.93	FALSE
Potri.001G168000	-0.69	0.21	FALSE
Potri.001G168100	-0.78	7.9e-07	TRUE
Potri.001G168200	-2.5	1.9e-70	TRUE
Potri.001G168300	0.023	0.86	FALSE
Potri.001G168400	-0.75	0.2	FALSE
Potri.001G168500	0	NA	NA
Potri.001G168600	0.12	0.66	FALSE
Potri.001G168700	-0.099	0.54	FALSE
Potri.001G168800	0.67	0.067	FALSE
Potri.001G168900	0.67	0.2	FALSE
Potri.001G169000	1.1	0.057	FALSE
Potri.001G169100	0	NA	NA
Potri.001G169200	0.1	0.79	FALSE
Potri.001G169300	0	NA	NA
Potri.001G169400	NA	NA	NA
Potri.001G169500	0.82	0.64	FALSE
Potri.001G169600	-0.69	0.045	TRUE
Potri.001G169700	-0.058	0.75	FALSE
Potri.001G169800	NA	NA	NA
Potri.001G169900	-0.32	0.026	TRUE
Potri.001G170000	-1.1	0.0017	TRUE
Potri.001G170100	-0.28	0.24	FALSE
Potri.001G170200	0.14	0.23	FALSE
Potri.001G170300	0.3	4.4e-05	TRUE
Potri.001G170400	0.53	6.4e-10	TRUE
Potri.001G170500	-0.54	0.012	TRUE
Potri.001G170600	NA	NA	NA
Potri.001G170700	-0.36	8.2e-06	TRUE
Potri.001G170800	0.19	0.54	FALSE
Potri.001G170900	0	NA	NA
Potri.001G171000	0.53	1.3e-08	TRUE
Potri.001G171100	-0.31	1.5e-05	TRUE
Potri.001G171200	0.53	6.6e-10	TRUE
Potri.001G171300	-0.13	0.71	FALSE
Potri.001G171400	0.96	0.046	TRUE
Potri.001G171500	1.5	0.29	FALSE
Potri.001G171600	-0.58	0.18	FALSE
Potri.001G171700	-4.1	0.0045	TRUE
Potri.001G171800	0.37	0.00063	TRUE
Potri.001G171900	-0.07	0.76	FALSE
Potri.001G172000	3.4	NA	NA
Potri.001G172100	-0.78	0.00022	TRUE
Potri.001G172200	NA	NA	NA
Potri.001G172300	0.025	0.98	FALSE
Potri.001G172400	0.17	0.3	FALSE
Potri.001G172500	0.26	0.24	FALSE
Potri.001G172600	0.27	0.068	FALSE
Potri.001G172700	1.4	1.3e-05	TRUE
Potri.001G172800	0.1	0.29	FALSE
Potri.001G172900	0.1	0.98	FALSE
Potri.001G173000	-9.1	0.00012	TRUE
Potri.001G173100	-0.037	0.92	FALSE
Potri.001G173200	-5.9	0.029	TRUE
Potri.001G173300	-0.65	0.017	TRUE
Potri.001G173400	1.4	0.056	FALSE
Potri.001G173500	-0.13	0.47	FALSE
Potri.001G173600	-1.9	NA	NA
Potri.001G173700	1.4	9.5e-08	TRUE
Potri.001G173800	0.043	0.62	FALSE
Potri.001G173900	-0.51	0.00065	TRUE
Potri.001G174000	0.092	0.6	FALSE
Potri.001G174100	0.019	0.92	FALSE
Potri.001G174200	-2.7	NA	NA
Potri.001G174300	1.3	2.3e-06	TRUE
Potri.001G174400	1.4	0.0072	TRUE
Potri.001G174500	0.29	0.73	FALSE
Potri.001G174600	0.3	0.0032	TRUE
Potri.001G174700	1.8	0.024	TRUE
Potri.001G174800	NA	NA	NA
Potri.001G174900	0.086	0.46	FALSE
Potri.001G175000	0.5	2.7e-05	TRUE
Potri.001G175100	NA	NA	NA
Potri.001G175200	-1.3	1.4e-08	TRUE
Potri.001G175300	NA	NA	NA
Potri.001G175400	0.89	0.0087	TRUE
Potri.001G175500	0.95	0.0014	TRUE
Potri.001G175600	0.31	0.033	TRUE
Potri.001G175700	0.74	0.46	FALSE
Potri.001G175800	1	0.38	FALSE
Potri.001G175900	2.2	0.0041	TRUE
Potri.001G176000	0.75	0.45	FALSE
Potri.001G176100	1.2	0.12	FALSE
Potri.001G176200	-0.67	0.79	FALSE
Potri.001G176300	NA	NA	NA
Potri.001G176400	NA	NA	NA
Potri.001G176500	2.9	8e-14	TRUE
Potri.001G176600	0.94	0.028	TRUE
Potri.001G176700	NA	NA	NA
Potri.001G176800	3.1	NA	NA
Potri.001G176900	0.4	0.0014	TRUE
Potri.001G177000	-0.017	0.9	FALSE
Potri.001G177100	0.27	0.64	FALSE
Potri.001G177200	0.26	0.15	FALSE
Potri.001G177300	0.022	0.94	FALSE
Potri.001G177400	-1.1	5.9e-09	TRUE
Potri.001G177500	-0.29	0.49	FALSE
Potri.001G177600	1.8	0.073	FALSE
Potri.001G177700	0.7	0.19	FALSE
Potri.001G177800	-0.5	0.73	FALSE
Potri.001G177900	1.9	0.012	TRUE
Potri.001G178000	-0.36	0.00063	TRUE
Potri.001G178100	0.61	0.00059	TRUE
Potri.001G178200	0.31	0.032	TRUE
Potri.001G178300	-0.27	0.42	FALSE
Potri.001G178400	-0.084	0.7	FALSE
Potri.001G178500	-1.2	0.36	FALSE
Potri.001G178600	0.16	0.91	FALSE
Potri.001G178700	NA	NA	NA
Potri.001G178800	-0.15	0.18	FALSE
Potri.001G178900	-0.18	0.06	FALSE
Potri.001G179000	0.28	0.035	TRUE
Potri.001G179100	0.15	0.044	TRUE
Potri.001G179200	0.16	0.039	TRUE
Potri.001G179300	4.8	0.091	FALSE
Potri.001G179400	2.9	5.7e-11	TRUE
Potri.001G179500	0.083	0.47	FALSE
Potri.001G179600	0.79	1.6e-09	TRUE
Potri.001G179700	0.25	0.11	FALSE
Potri.001G179800	0.39	1.7e-05	TRUE
Potri.001G179900	NA	NA	NA
Potri.001G180000	0.13	0.45	FALSE
Potri.001G180100	-0.27	2.2e-07	TRUE
Potri.001G180200	-0.35	0.11	FALSE
Potri.001G180300	0.48	0.6	FALSE
Potri.001G180400	0.81	0.71	FALSE
Potri.001G180500	1.6	0.0004	TRUE
Potri.001G180600	-0.22	0.67	FALSE
Potri.001G180700	NA	NA	NA
Potri.001G180800	NA	NA	NA
Potri.001G180900	NA	NA	NA
Potri.001G181000	0.074	0.9	FALSE
Potri.001G181100	-0.4	0.00019	TRUE
Potri.001G181200	0.12	0.58	FALSE
Potri.001G181300	-1.1	0.015	TRUE
Potri.001G181400	NA	NA	NA
Potri.001G181500	-1.8	0.49	FALSE
Potri.001G181600	0.49	0.84	FALSE
Potri.001G181700	-0.58	0.00038	TRUE
Potri.001G181800	0.26	0.17	FALSE
Potri.001G181900	1.9	0.0017	TRUE
Potri.001G182000	1.3	3.7e-26	TRUE
Potri.001G182100	0.19	0.34	FALSE
Potri.001G182200	NA	NA	NA
Potri.001G182300	0.48	0.0013	TRUE
Potri.001G182400	0.82	0.61	FALSE
Potri.001G182500	1.3	7.9e-05	TRUE
Potri.001G182600	0.3	0.47	FALSE
Potri.001G182700	0.45	0.0042	TRUE
Potri.001G182800	NA	NA	NA
Potri.001G182900	0.26	0.34	FALSE
Potri.001G183000	0.28	0.14	FALSE
Potri.001G183100	-0.12	0.26	FALSE
Potri.001G183200	0.27	0.18	FALSE
Potri.001G183300	1.4	NA	NA
Potri.001G183400	0	1	FALSE
Potri.001G183500	0.0025	1	FALSE
Potri.001G183600	0.81	0.00013	TRUE
Potri.001G183700	0.42	0.0086	TRUE
Potri.001G183800	0.11	0.95	FALSE
Potri.001G183900	-2.2	NA	NA
Potri.001G184000	0.59	4.1e-07	TRUE
Potri.001G184100	0.55	0.00058	TRUE
Potri.001G184200	-0.29	0.1	FALSE
Potri.001G184300	-0.62	0.38	FALSE
Potri.001G184400	-0.32	0.43	FALSE
Potri.001G184500	NA	NA	NA
Potri.001G184600	NA	NA	NA
Potri.001G184700	0.49	3.9e-06	TRUE
Potri.001G184800	-0.25	0.69	FALSE
Potri.001G184900	NA	NA	NA
Potri.001G185000	-0.24	0.11	FALSE
Potri.001G185100	0.17	0.2	FALSE
Potri.001G185200	-1.4	0.0057	TRUE
Potri.001G185300	-0.3	0.12	FALSE
Potri.001G185400	-0.25	0.87	FALSE
Potri.001G185500	-0.63	1.1e-05	TRUE
Potri.001G185600	0.3	0.033	TRUE
Potri.001G185700	0.65	0.0023	TRUE
Potri.001G185800	NA	NA	NA
Potri.001G185900	0.69	1.3e-06	TRUE
Potri.001G186000	-0.5	4.9e-07	TRUE
Potri.001G186100	0.56	0.00046	TRUE
Potri.001G186200	0.62	0.0038	TRUE
Potri.001G186300	NA	NA	NA
Potri.001G186400	0.33	0.83	FALSE
Potri.001G186500	0.68	0.00058	TRUE
Potri.001G186600	-0.063	0.77	FALSE
Potri.001G186700	2.4	1.3e-69	TRUE
Potri.001G186800	0.57	0.0026	TRUE
Potri.001G186900	0.11	0.27	FALSE
Potri.001G187000	0.015	0.91	FALSE
Potri.001G187100	0.3	0.15	FALSE
Potri.001G187200	0.52	2.4e-05	TRUE
Potri.001G187300	-0.75	0.00042	TRUE
Potri.001G187400	-0.23	0.91	FALSE
Potri.001G187500	0.53	0.048	TRUE
Potri.001G187600	0.53	0.65	FALSE
Potri.001G187700	0	1	FALSE
Potri.001G187800	-2.5	NA	NA
Potri.001G187900	NA	NA	NA
Potri.001G188000	-0.55	0.15	FALSE
Potri.001G188100	NA	NA	NA
Potri.001G188200	-1.5	NA	NA
Potri.001G188300	-0.066	0.5	FALSE
Potri.001G188400	0.18	0.49	FALSE
Potri.001G188500	1.6	0.001	TRUE
Potri.001G188600	NA	NA	NA
Potri.001G188700	0.042	0.93	FALSE
Potri.001G188800	0.23	0.067	FALSE
Potri.001G188900	-1	0.0018	TRUE
Potri.001G189000	NA	NA	NA
Potri.001G189100	-0.064	0.45	FALSE
Potri.001G189200	0.081	0.57	FALSE
Potri.001G189300	0	NA	NA
Potri.001G189400	0.25	0.54	FALSE
Potri.001G189500	-0.47	0.021	TRUE
Potri.001G189600	NA	NA	NA
Potri.001G189700	-0.86	9.9e-06	TRUE
Potri.001G189800	0.075	0.68	FALSE
Potri.001G189900	2.4	7.9e-06	TRUE
Potri.001G190000	0.17	0.096	FALSE
Potri.001G190100	0.58	0.00017	TRUE
Potri.001G190200	0.15	0.36	FALSE
Potri.001G190300	1.1	6.7e-08	TRUE
Potri.001G190400	-0.11	0.65	FALSE
Potri.001G190500	0.52	0.07	FALSE
Potri.001G190600	0	1	FALSE
Potri.001G190700	1.2	0.0013	TRUE
Potri.001G190800	0.16	0.61	FALSE
Potri.001G190900	-2.2	NA	NA
Potri.001G191000	3.6	5.7e-22	TRUE
Potri.001G191100	0.27	0.0049	TRUE
Potri.001G191200	0.19	0.1	FALSE
Potri.001G191300	-0.02	0.95	FALSE
Potri.001G191400	0.34	0.8	FALSE
Potri.001G191500	-4.4	0.096	FALSE
Potri.001G191600	-1.7	NA	NA
Potri.001G191700	NA	NA	NA
Potri.001G191800	-1.5	0.0018	TRUE
Potri.001G191900	0	1	FALSE
Potri.001G192000	0.55	0.00049	TRUE
Potri.001G192100	-2.7	0.0072	TRUE
Potri.001G192200	0.057	0.86	FALSE
Potri.001G192300	0.2	0.87	FALSE
Potri.001G192400	0.87	0.5	FALSE
Potri.001G192500	0.39	0.00054	TRUE
Potri.001G192600	-2.9	2.5e-05	TRUE
Potri.001G192700	-0.33	0.013	TRUE
Potri.001G192800	-3.8	3.9e-28	TRUE
Potri.001G192900	NA	NA	NA
Potri.001G193000	-0.43	2.3e-05	TRUE
Potri.001G193100	0.3	0.0032	TRUE
Potri.001G193200	-1.4	0.0007	TRUE
Potri.001G193300	0.043	0.75	FALSE
Potri.001G193400	1.1	2.9e-08	TRUE
Potri.001G193500	0.25	0.16	FALSE
Potri.001G193600	-0.21	NA	NA
Potri.001G193700	0.38	2.4e-08	TRUE
Potri.001G193800	NA	NA	NA
Potri.001G193900	-0.062	0.62	FALSE
Potri.001G194000	0.075	0.72	FALSE
Potri.001G194100	-3.8	8.8e-32	TRUE
Potri.001G194200	NA	NA	NA
Potri.001G194300	NA	NA	NA
Potri.001G194400	0.44	0.018	TRUE
Potri.001G194500	-1.7	0.022	TRUE
Potri.001G194600	NA	NA	NA
Potri.001G194700	NA	NA	NA
Potri.001G194800	0.2	NA	NA
Potri.001G194900	NA	NA	NA
Potri.001G195000	-0.89	0.43	FALSE
Potri.001G195100	NA	NA	NA
Potri.001G195200	NA	NA	NA
Potri.001G195300	0.52	0.0004	TRUE
Potri.001G195400	NA	NA	NA
Potri.001G195500	NA	NA	NA
Potri.001G195600	NA	NA	NA
Potri.001G195700	NA	NA	NA
Potri.001G195800	NA	NA	NA
Potri.001G195900	0.46	0.029	TRUE
Potri.001G196000	NA	NA	NA
Potri.001G196100	-0.71	0.72	FALSE
Potri.001G196200	NA	NA	NA
Potri.001G196300	-2.7	NA	NA
Potri.001G196400	NA	NA	NA
Potri.001G196500	-0.41	1.6e-05	TRUE
Potri.001G196600	-0.21	0.02	TRUE
Potri.001G196700	0.4	0.0019	TRUE
Potri.001G196800	0.097	0.15	FALSE
Potri.001G196900	NA	NA	NA
Potri.001G197000	-1.1	0.12	FALSE
Potri.001G197100	2.8	0.19	FALSE
Potri.001G197200	0.33	0.0035	TRUE
Potri.001G197300	-0.22	0.02	TRUE
Potri.001G197400	-0.28	2.5e-08	TRUE
Potri.001G197500	-0.57	1.6e-06	TRUE
Potri.001G197600	-0.13	0.026	TRUE
Potri.001G197700	-1.1	1.2e-08	TRUE
Potri.001G197800	NA	NA	NA
Potri.001G197900	0.21	0.001	TRUE
Potri.001G198000	-0.17	0.23	FALSE
Potri.001G198100	-0.26	0.043	TRUE
Potri.001G198200	NA	NA	NA
Potri.001G198300	-1	NA	NA
Potri.001G198400	0.14	0.92	FALSE
Potri.001G198500	-0.087	0.77	FALSE
Potri.001G198600	-0.44	0.00043	TRUE
Potri.001G198700	-0.097	0.3	FALSE
Potri.001G198800	-3.7	NA	NA
Potri.001G198900	-0.78	0.014	TRUE
Potri.001G199000	0.14	NA	NA
Potri.001G199100	0.4	0.15	FALSE
Potri.001G199200	-0.48	1.6e-05	TRUE
Potri.001G199300	-3	NA	NA
Potri.001G199400	NA	NA	NA
Potri.001G199500	0.34	1.8e-05	TRUE
Potri.001G199600	0.19	0.013	TRUE
Potri.001G199700	NA	NA	NA
Potri.001G199800	NA	NA	NA
Potri.001G199900	NA	NA	NA
[truncated: 39,336 more rows]

## Sheet: Genes_root
Gene_ID	Log2FC	P-adj	Sig
Potri.001G000100	NA	NA	NA
Potri.001G000200	0.27	NA	NA
Potri.001G000300	-1.7	NA	NA
Potri.001G000400	-0.19	0.13	FALSE
Potri.001G000500	0.68	0.55	FALSE
Potri.001G000600	0.052	1	FALSE
Potri.001G000700	0.11	0.06	FALSE
Potri.001G000800	0.43	0.067	FALSE
Potri.001G000900	-0.24	0.0056	TRUE
Potri.001G001000	-0.021	1	FALSE
Potri.001G001100	0.53	0.014	TRUE
Potri.001G001200	0.42	0.68	FALSE
Potri.001G001300	0.013	0.96	FALSE
Potri.001G001400	-0.3	0.00085	TRUE
Potri.001G001500	0.02	0.89	FALSE
Potri.001G001600	-0.086	0.55	FALSE
Potri.001G001700	0.24	0.0079	TRUE
Potri.001G001800	-0.58	0.00082	TRUE
Potri.001G001900	0.27	NA	NA
Potri.001G002000	0.25	0.0019	TRUE
Potri.001G002100	-0.058	0.91	FALSE
Potri.001G002200	0.99	0.00041	TRUE
Potri.001G002300	0.3	0.032	TRUE
Potri.001G002400	0.019	0.98	FALSE
Potri.001G002500	0.33	0.00048	TRUE
Potri.001G002600	-0.15	0.42	FALSE
Potri.001G002700	2.6	1.4e-25	TRUE
Potri.001G002800	0.48	0.37	FALSE
Potri.001G002900	1.1	0.015	TRUE
Potri.001G003000	0.29	0.57	FALSE
Potri.001G003100	-0.55	0.0085	TRUE
Potri.001G003200	1.5	0.0002	TRUE
Potri.001G003300	0.077	0.83	FALSE
Potri.001G003400	-0.63	9.7e-05	TRUE
Potri.001G003500	-0.86	0.0014	TRUE
Potri.001G003600	-3.5	0.059	FALSE
Potri.001G003700	0.25	0.18	FALSE
Potri.001G003800	0.83	1e-12	TRUE
Potri.001G003900	0.46	0.00013	TRUE
Potri.001G004000	0.11	0.48	FALSE
Potri.001G004100	-0.019	0.95	FALSE
Potri.001G004200	0.066	0.7	FALSE
Potri.001G004300	0.058	0.7	FALSE
Potri.001G004400	-0.11	0.98	FALSE
Potri.001G004500	-0.12	0.42	FALSE
Potri.001G004600	0.15	0.41	FALSE
Potri.001G004700	-0.78	0.27	FALSE
Potri.001G004800	0.0084	0.95	FALSE
Potri.001G004900	-0.039	0.99	FALSE
Potri.001G005000	0.23	0.15	FALSE
Potri.001G005100	-0.8	0.00017	TRUE
Potri.001G005200	-0.25	0.39	FALSE
Potri.001G005300	0.29	0.34	FALSE
Potri.001G005400	-0.5	0.066	FALSE
Potri.001G005500	0.37	0.04	TRUE
Potri.001G005600	1.6	3.8e-09	TRUE
Potri.001G005700	-0.47	0.82	FALSE
Potri.001G005800	-0.022	1	FALSE
Potri.001G005900	-0.33	0.06	FALSE
Potri.001G006000	-0.14	0.66	FALSE
Potri.001G006100	0.35	0.19	FALSE
Potri.001G006200	-0.35	0.4	FALSE
Potri.001G006300	-0.61	0.0019	TRUE
Potri.001G006400	-0.11	0.24	FALSE
Potri.001G006500	0.47	0.03	TRUE
Potri.001G006600	1.4	0.084	FALSE
Potri.001G006700	0.2	0.69	FALSE
Potri.001G006800	0	NA	NA
Potri.001G006900	-1.7	NA	NA
Potri.001G007000	-2.5	2.5e-16	TRUE
Potri.001G007100	-2.7	0.03	TRUE
Potri.001G007200	-0.54	0.00014	TRUE
Potri.001G007300	-0.15	0.55	FALSE
Potri.001G007400	5	0.1	FALSE
Potri.001G007500	0.9	0.078	FALSE
Potri.001G007600	NA	NA	NA
Potri.001G007700	1.4	0.0019	TRUE
Potri.001G007800	-0.13	0.016	TRUE
Potri.001G007900	-0.34	4.7e-06	TRUE
Potri.001G008000	-0.017	0.96	FALSE
Potri.001G008100	-1.8	0.0093	TRUE
Potri.001G008200	-1.1	0.36	FALSE
Potri.001G008300	-0.4	0.055	FALSE
Potri.001G008400	-0.15	0.55	FALSE
Potri.001G008500	0.79	4.8e-05	TRUE
Potri.001G008600	0.99	0.34	FALSE
Potri.001G008700	0.084	0.66	FALSE
Potri.001G008800	0.13	0.1	FALSE
Potri.001G008900	-5	1.1e-09	TRUE
Potri.001G009000	-0.16	0.92	FALSE
Potri.001G009100	0.46	0.15	FALSE
Potri.001G009200	-0.96	6.9e-05	TRUE
Potri.001G009300	0.56	0.6	FALSE
Potri.001G009400	0	1	FALSE
Potri.001G009500	0.43	0.16	FALSE
Potri.001G009600	-0.15	0.55	FALSE
Potri.001G009700	-0.56	8.7e-08	TRUE
Potri.001G009800	-0.15	0.53	FALSE
Potri.001G009900	-0.64	0.63	FALSE
Potri.001G010000	1.3	0.00049	TRUE
Potri.001G010100	2	1.8e-17	TRUE
Potri.001G010200	1.5	1.9e-10	TRUE
Potri.001G010300	0.32	0.43	FALSE
Potri.001G010400	0.21	0.21	FALSE
Potri.001G010500	-0.76	5.9e-09	TRUE
Potri.001G010600	-2.6	4.6e-08	TRUE
Potri.001G010700	0.079	0.8	FALSE
Potri.001G010800	0.33	0.0015	TRUE
Potri.001G010900	-1	0.34	FALSE
Potri.001G011000	0.52	0.32	FALSE
Potri.001G011100	NA	NA	NA
Potri.001G011200	0.21	0.88	FALSE
Potri.001G011300	-0.31	0.35	FALSE
Potri.001G011400	2.4	NA	NA
Potri.001G011500	-2.6	0.00074	TRUE
Potri.001G011600	NA	NA	NA
Potri.001G011700	1.5	0.00038	TRUE
Potri.001G011800	-0.43	0.0013	TRUE
Potri.001G011900	-0.15	0.25	FALSE
Potri.001G012000	-0.18	0.64	FALSE
Potri.001G012100	NA	NA	NA
Potri.001G012200	0.26	0.31	FALSE
Potri.001G012300	0.61	0.053	FALSE
Potri.001G012400	3.1	0.0062	TRUE
Potri.001G012500	0.9	0.84	FALSE
Potri.001G012600	0	NA	NA
Potri.001G012700	-0.49	0.23	FALSE
Potri.001G012800	0.19	0.31	FALSE
Potri.001G012900	0	NA	NA
Potri.001G013000	0.054	0.95	FALSE
Potri.001G013100	0.026	NA	NA
Potri.001G013200	0.00094	1	FALSE
Potri.001G013300	0.049	0.69	FALSE
Potri.001G013400	-0.021	1	FALSE
Potri.001G013500	0.26	0.27	FALSE
Potri.001G013600	-0.69	0.00015	TRUE
Potri.001G013700	0.29	0.01	TRUE
Potri.001G013800	-0.038	0.67	FALSE
Potri.001G013900	-0.035	0.75	FALSE
Potri.001G014000	0.24	0.011	TRUE
Potri.001G014100	-0.15	0.94	FALSE
Potri.001G014200	2.5	NA	NA
Potri.001G014300	2.4	0.52	FALSE
Potri.001G014400	-2.2	0.17	FALSE
Potri.001G014500	4.4	0.22	FALSE
Potri.001G014600	0.32	0.86	FALSE
Potri.001G014700	5.9	0.00075	TRUE
Potri.001G014800	0	NA	NA
Potri.001G014900	0.37	0.13	FALSE
Potri.001G015000	0.02	0.89	FALSE
Potri.001G015100	0.59	0.38	FALSE
Potri.001G015200	NA	NA	NA
Potri.001G015300	-3.4	0.28	FALSE
Potri.001G015400	-1.2	NA	NA
Potri.001G015500	0.014	1	FALSE
Potri.001G015600	-1.1	0.57	FALSE
Potri.001G015700	0.65	0.0011	TRUE
Potri.001G015800	NA	NA	NA
Potri.001G015900	-0.92	8.5e-10	TRUE
Potri.001G016000	-0.44	0.0011	TRUE
Potri.001G016100	-2.7	0.29	FALSE
Potri.001G016200	-0.59	0.005	TRUE
Potri.001G016300	0.41	0.018	TRUE
Potri.001G016400	NA	NA	NA
Potri.001G016500	-0.65	0.86	FALSE
Potri.001G016600	0.59	0.0034	TRUE
Potri.001G016700	0.53	0.054	FALSE
Potri.001G016800	0.77	0.0075	TRUE
Potri.001G016900	0.37	0.3	FALSE
Potri.001G017000	-0.98	0.00034	TRUE
Potri.001G017100	0.47	0.013	TRUE
Potri.001G017200	0	NA	NA
Potri.001G017300	-0.35	0.0042	TRUE
Potri.001G017400	NA	NA	NA
Potri.001G017500	-1.5	4.6e-08	TRUE
Potri.001G017600	0.51	0.3	FALSE
Potri.001G017700	0.63	0.14	FALSE
Potri.001G017800	0.18	0.83	FALSE
Potri.001G017900	0.24	0.81	FALSE
Potri.001G018000	-2.5	NA	NA
Potri.001G018100	-0.06	0.75	FALSE
Potri.001G018200	-0.093	0.59	FALSE
Potri.001G018300	0.079	0.82	FALSE
Potri.001G018400	0.57	0.027	TRUE
Potri.001G018500	-0.16	0.21	FALSE
Potri.001G018600	6	0.058	FALSE
Potri.001G018700	0.58	0.04	TRUE
Potri.001G018800	0.2	0.018	TRUE
Potri.001G018900	0.55	0.9	FALSE
Potri.001G019000	0.49	3.7e-09	TRUE
Potri.001G019100	-1.5	2e-13	TRUE
Potri.001G019200	0.43	0.023	TRUE
Potri.001G019300	-0.17	0.91	FALSE
Potri.001G019400	-0.032	0.94	FALSE
Potri.001G019500	0.078	0.79	FALSE
Potri.001G019600	0.086	0.56	FALSE
Potri.001G019700	-0.41	0.56	FALSE
Potri.001G019800	0.19	0.89	FALSE
Potri.001G019900	0.48	0.37	FALSE
Potri.001G020000	0.53	0.67	FALSE
Potri.001G020100	-0.97	0.12	FALSE
Potri.001G020200	1	1.3e-06	TRUE
Potri.001G020300	0.79	6.7e-10	TRUE
Potri.001G020400	4	0.19	FALSE
Potri.001G020500	0.4	0.22	FALSE
Potri.001G020600	-3.1	2.9e-06	TRUE
Potri.001G020700	0.13	0.37	FALSE
Potri.001G020800	-1.3	1.8e-05	TRUE
Potri.001G020900	-1.4	0.00094	TRUE
Potri.001G021000	1	4.5e-06	TRUE
Potri.001G021100	-0.4	0.033	TRUE
Potri.001G021200	-0.036	1	FALSE
Potri.001G021300	0.55	0.7	FALSE
Potri.001G021400	NA	NA	NA
Potri.001G021500	-0.11	0.52	FALSE
Potri.001G021600	-0.3	0.048	TRUE
Potri.001G021700	1.4	0.75	FALSE
Potri.001G021800	NA	NA	NA
Potri.001G021900	0.33	0.91	FALSE
Potri.001G022000	NA	NA	NA
Potri.001G022100	-3.7	NA	NA
Potri.001G022200	NA	NA	NA
Potri.001G022300	2.2	NA	NA
Potri.001G022400	-0.021	0.96	FALSE
Potri.001G022500	0.38	0.0061	TRUE
Potri.001G022600	-1.3	0.34	FALSE
Potri.001G022700	0.27	0.056	FALSE
Potri.001G022800	NA	NA	NA
Potri.001G022900	0.24	0.26	FALSE
Potri.001G023000	-0.095	0.67	FALSE
Potri.001G023100	-0.22	0.14	FALSE
Potri.001G023200	NA	NA	NA
Potri.001G023300	2.4	NA	NA
Potri.001G023400	0.99	0.0076	TRUE
Potri.001G023500	0.52	0.0038	TRUE
Potri.001G023600	-0.55	0.63	FALSE
Potri.001G023700	NA	NA	NA
Potri.001G023800	0.74	0.0079	TRUE
Potri.001G023900	0.29	0.6	FALSE
Potri.001G024000	-0.042	0.78	FALSE
Potri.001G024100	0.14	0.44	FALSE
Potri.001G024200	0.29	0.075	FALSE
Potri.001G024300	0.93	3.7e-08	TRUE
Potri.001G024400	0.12	0.83	FALSE
Potri.001G024500	0.036	0.86	FALSE
Potri.001G024600	0.35	0.2	FALSE
Potri.001G024700	NA	NA	NA
Potri.001G024800	-0.22	0.36	FALSE
Potri.001G024900	-0.59	0.024	TRUE
Potri.001G025000	-3.5	0.31	FALSE
Potri.001G025100	-0.8	3.1e-10	TRUE
Potri.001G025200	0.67	0.36	FALSE
Potri.001G025300	0.033	0.96	FALSE
Potri.001G025400	0.83	7.7e-09	TRUE
Potri.001G025500	-1.3	0.059	FALSE
Potri.001G025600	0.4	0.28	FALSE
Potri.001G025700	0.031	1	FALSE
Potri.001G025800	-4.6	0.025	TRUE
Potri.001G025900	NA	NA	NA
Potri.001G026000	-0.77	4e-06	TRUE
Potri.001G026100	-0.41	4.8e-05	TRUE
Potri.001G026200	-0.77	0.00022	TRUE
Potri.001G026300	0.23	0.08	FALSE
Potri.001G026400	-2.1	8.1e-05	TRUE
Potri.001G026500	-0.23	0.81	FALSE
Potri.001G026600	-0.69	3.3e-13	TRUE
Potri.001G026700	-0.3	0.0037	TRUE
Potri.001G026800	0.42	4.6e-05	TRUE
Potri.001G026900	0.63	0.00011	TRUE
Potri.001G027000	-0.64	0.02	TRUE
Potri.001G027100	0.28	0.7	FALSE
Potri.001G027200	0.8	0.027	TRUE
Potri.001G027300	NA	NA	NA
Potri.001G027400	0.46	0.0018	TRUE
Potri.001G027500	-4.1	NA	NA
Potri.001G027600	-0.097	0.65	FALSE
Potri.001G027700	0.8	0.0025	TRUE
Potri.001G027800	-1.4	0.58	FALSE
Potri.001G027900	-0.081	0.9	FALSE
Potri.001G028000	0.64	0.012	TRUE
Potri.001G028100	-0.37	0.025	TRUE
Potri.001G028200	0.76	0.032	TRUE
Potri.001G028300	-0.65	4.2e-09	TRUE
Potri.001G028400	0.53	0.014	TRUE
Potri.001G028500	0.46	0.017	TRUE
Potri.001G028600	0.53	0.63	FALSE
Potri.001G028700	0.4	0.18	FALSE
Potri.001G028800	0.53	0.16	FALSE
Potri.001G028900	-1.2	0.044	TRUE
Potri.001G029000	0.14	0.64	FALSE
Potri.001G029100	NA	NA	NA
Potri.001G029200	NA	NA	NA
Potri.001G029300	0.18	0.48	FALSE
Potri.001G029400	0.2	0.093	FALSE
Potri.001G029500	-0.052	0.86	FALSE
Potri.001G029600	-0.33	0.0037	TRUE
Potri.001G029700	-1.8	0.0015	TRUE
Potri.001G029800	-0.26	0.053	FALSE
Potri.001G029900	-0.016	0.94	FALSE
Potri.001G030000	0.2	0.058	FALSE
Potri.001G030100	0.32	0.0039	TRUE
Potri.001G030200	0.5	1.3e-05	TRUE
Potri.001G030300	0.051	0.79	FALSE
Potri.001G030400	3.3	NA	NA
Potri.001G030500	NA	NA	NA
Potri.001G030600	-0.056	0.95	FALSE
Potri.001G030700	0.4	2.8e-06	TRUE
Potri.001G030800	0.53	0.0059	TRUE
Potri.001G030900	-0.037	0.68	FALSE
Potri.001G031000	NA	NA	NA
Potri.001G031100	NA	NA	NA
Potri.001G031200	NA	NA	NA
Potri.001G031300	NA	NA	NA
Potri.001G031400	0.28	0.053	FALSE
Potri.001G031500	0.13	0.54	FALSE
Potri.001G031600	-6	0.031	TRUE
Potri.001G031700	-0.0074	0.97	FALSE
Potri.001G031800	-2.2	6.2e-14	TRUE
Potri.001G031900	-0.055	0.99	FALSE
Potri.001G032000	-0.49	2.3e-06	TRUE
Potri.001G032100	0.95	0.75	FALSE
Potri.001G032200	0.21	0.87	FALSE
Potri.001G032300	-0.15	0.91	FALSE
Potri.001G032400	1.8	8.9e-06	TRUE
Potri.001G032500	0.7	0.0042	TRUE
Potri.001G032600	0.25	0.65	FALSE
Potri.001G032700	0.039	0.99	FALSE
Potri.001G032800	0.17	0.22	FALSE
Potri.001G032900	-0.9	2.4e-09	TRUE
Potri.001G033000	-5.6	0.16	FALSE
Potri.001G033100	-2.6	0.034	TRUE
Potri.001G033200	-0.098	0.46	FALSE
Potri.001G033300	1.7	0.49	FALSE
Potri.001G033400	-0.44	0.8	FALSE
Potri.001G033500	0.45	0.058	FALSE
Potri.001G033600	-0.019	0.91	FALSE
Potri.001G033700	0.94	0.74	FALSE
Potri.001G033800	0.087	0.84	FALSE
Potri.001G033900	-0.017	0.9	FALSE
Potri.001G034000	NA	NA	NA
Potri.001G034100	1	0.011	TRUE
Potri.001G034200	-0.34	0.00028	TRUE
Potri.001G034300	-0.91	0.0024	TRUE
Potri.001G034400	0.064	0.73	FALSE
Potri.001G034500	0.14	0.48	FALSE
Potri.001G034600	0.3	0.13	FALSE
Potri.001G034700	-0.25	0.042	TRUE
Potri.001G034800	-2.5	NA	NA
Potri.001G034900	-0.053	0.94	FALSE
Potri.001G035000	0.1	0.49	FALSE
Potri.001G035100	0	NA	NA
Potri.001G035200	-0.23	0.48	FALSE
Potri.001G035300	0.048	0.82	FALSE
Potri.001G035400	1.5	0.32	FALSE
Potri.001G035500	0.24	0.52	FALSE
Potri.001G035600	0.35	0.32	FALSE
Potri.001G035700	-0.079	0.61	FALSE
Potri.001G035800	-0.38	9.3e-05	TRUE
Potri.001G035900	-0.78	0.33	FALSE
Potri.001G036000	-0.22	0.17	FALSE
Potri.001G036100	-0.89	6.2e-17	TRUE
Potri.001G036200	NA	NA	NA
Potri.001G036300	0.014	0.95	FALSE
Potri.001G036400	-0.18	0.027	TRUE
Potri.001G036500	3	0.062	FALSE
Potri.001G036600	-0.99	0.0012	TRUE
Potri.001G036700	-0.31	0.85	FALSE
Potri.001G036800	0.14	0.072	FALSE
Potri.001G036900	-0.48	0.00089	TRUE
Potri.001G037000	-0.74	0.063	FALSE
Potri.001G037100	-1.6	0.0043	TRUE
Potri.001G037200	0.39	0.015	TRUE
Potri.001G037300	0.24	0.36	FALSE
Potri.001G037400	-1	1.5e-07	TRUE
Potri.001G037500	0.1	0.68	FALSE
Potri.001G037600	-1.8	0.45	FALSE
Potri.001G037700	0.055	0.9	FALSE
Potri.001G037800	0	NA	NA
Potri.001G037900	-0.36	0.39	FALSE
Potri.001G038000	0.023	0.83	FALSE
Potri.001G038100	-0.19	0.34	FALSE
Potri.001G038200	0.62	9.2e-05	TRUE
Potri.001G038300	0.021	0.99	FALSE
Potri.001G038400	-0.8	0.54	FALSE
Potri.001G038500	-0.5	0.92	FALSE
Potri.001G038600	2	0.2	FALSE
Potri.001G038700	4	0.19	FALSE
Potri.001G038800	0	1	FALSE
Potri.001G038900	-0.18	0.91	FALSE
Potri.001G039000	-0.13	NA	NA
Potri.001G039100	2.4	0.018	TRUE
Potri.001G039200	2.1	0.00015	TRUE
Potri.001G039300	3.1	0.24	FALSE
Potri.001G039400	0.36	0.94	FALSE
Potri.001G039500	NA	NA	NA
Potri.001G039600	NA	NA	NA
Potri.001G039700	2.3	0.13	FALSE
Potri.001G039800	5.4	2.7e-05	TRUE
Potri.001G039900	1.6	0.36	FALSE
Potri.001G040000	0.95	0.42	FALSE
Potri.001G040100	1.4	0.26	FALSE
Potri.001G040200	0.84	0.61	FALSE
Potri.001G040300	3.8	0.19	FALSE
Potri.001G040400	NA	NA	NA
Potri.001G040500	0.47	0.75	FALSE
Potri.001G040600	2.1	0.027	TRUE
Potri.001G040700	NA	NA	NA
Potri.001G040800	-1.9	0.011	TRUE
Potri.001G040900	-0.64	0.67	FALSE
Potri.001G041000	0.49	0.76	FALSE
Potri.001G041100	0.26	0.74	FALSE
Potri.001G041200	0.67	6.6e-05	TRUE
Potri.001G041300	-0.017	1	FALSE
Potri.001G041400	0.52	0.0097	TRUE
Potri.001G041500	-0.37	0.079	FALSE
Potri.001G041600	0.31	0.073	FALSE
Potri.001G041700	0.87	0.00092	TRUE
Potri.001G041800	-1.8	8.7e-12	TRUE
Potri.001G041900	0.62	0.0018	TRUE
Potri.001G042000	-0.18	0.4	FALSE
Potri.001G042100	1.3	0.0045	TRUE
Potri.001G042200	-0.15	0.88	FALSE
Potri.001G042300	-4.1	NA	NA
Potri.001G042400	-0.23	0.71	FALSE
Potri.001G042500	-2	0.013	TRUE
Potri.001G042600	-3.5	1.2e-08	TRUE
Potri.001G042700	-0.76	0.24	FALSE
Potri.001G042800	0.4	0.26	FALSE
Potri.001G042900	-0.02	0.94	FALSE
Potri.001G043000	-0.17	0.33	FALSE
Potri.001G043100	-0.6	0.039	TRUE
Potri.001G043200	-0.17	0.035	TRUE
Potri.001G043300	-0.037	0.89	FALSE
Potri.001G043400	-0.4	0.009	TRUE
Potri.001G043500	-0.1	0.67	FALSE
Potri.001G043600	0.75	7.3e-06	TRUE
Potri.001G043700	0.75	0.008	TRUE
Potri.001G043800	0.24	0.98	FALSE
Potri.001G043900	0.3	0.65	FALSE
Potri.001G044000	0.26	0.085	FALSE
Potri.001G044100	0.53	0.022	TRUE
Potri.001G044200	0.41	0.0062	TRUE
Potri.001G044300	-2.4	2.7e-10	TRUE
Potri.001G044400	-0.99	0.013	TRUE
Potri.001G044500	-2.3	1.4e-20	TRUE
Potri.001G044600	-1.9	0.0017	TRUE
Potri.001G044700	-0.097	0.47	FALSE
Potri.001G044800	-0.8	0.67	FALSE
Potri.001G044900	0.35	0.02	TRUE
Potri.001G045000	-2.3	0.64	FALSE
Potri.001G045100	-3.9	0.051	FALSE
Potri.001G045200	0.41	0.21	FALSE
Potri.001G045300	-2.5	0.51	FALSE
Potri.001G045400	NA	NA	NA
Potri.001G045500	-0.45	0.66	FALSE
Potri.001G045600	-0.43	0.49	FALSE
Potri.001G045700	2.4	0.58	FALSE
Potri.001G045800	-1.1	0.11	FALSE
Potri.001G045900	-0.39	0.9	FALSE
Potri.001G046000	1.3	0.0041	TRUE
Potri.001G046100	-0.39	0.45	FALSE
Potri.001G046200	NA	NA	NA
Potri.001G046300	0.57	0.27	FALSE
Potri.001G046400	-0.9	0.043	TRUE
Potri.001G046500	0.43	3.7e-06	TRUE
Potri.001G046600	0.1	0.64	FALSE
Potri.001G046700	-0.65	5.1e-06	TRUE
Potri.001G046800	0.38	0.32	FALSE
Potri.001G046900	-0.33	0.067	FALSE
Potri.001G047000	-3	0.085	FALSE
Potri.001G047100	-0.27	0.00035	TRUE
Potri.001G047200	0.29	0.051	FALSE
Potri.001G047300	0.3	0.35	FALSE
Potri.001G047400	-0.089	0.52	FALSE
Potri.001G047500	0.65	0.00075	TRUE
Potri.001G047600	0.67	0.00026	TRUE
Potri.001G047700	0.55	0.0065	TRUE
Potri.001G047800	0.39	0.073	FALSE
Potri.001G047900	-0.29	0.0021	TRUE
Potri.001G048000	NA	NA	NA
Potri.001G048100	0.15	0.29	FALSE
Potri.001G048200	-0.12	0.77	FALSE
Potri.001G048300	-1.5	0.54	FALSE
Potri.001G048400	5	0.2	FALSE
Potri.001G048500	0.08	0.84	FALSE
Potri.001G048600	-2.5	NA	NA
Potri.001G048700	-1.9	1.8e-13	TRUE
Potri.001G048800	-2	5.3e-08	TRUE
Potri.001G048900	-0.15	0.86	FALSE
Potri.001G049000	-1.3	0.076	FALSE
Potri.001G049100	0.51	0.51	FALSE
Potri.001G049200	1	0.02	TRUE
Potri.001G049300	-0.17	0.28	FALSE
Potri.001G049400	0.025	0.85	FALSE
Potri.001G049500	NA	NA	NA
Potri.001G049600	2.9	6.9e-06	TRUE
Potri.001G049700	1.5	6.3e-06	TRUE
Potri.001G049800	-0.5	0.00086	TRUE
Potri.001G049900	-0.26	0.46	FALSE
Potri.001G050000	-0.083	0.36	FALSE
Potri.001G050100	-0.53	0.0067	TRUE
Potri.001G050200	0.19	0.96	FALSE
Potri.001G050300	0.52	0.0017	TRUE
Potri.001G050400	-0.72	0.0047	TRUE
Potri.001G050500	NA	NA	NA
Potri.001G050600	0.61	0.0095	TRUE
Potri.001G050700	0.32	0.0072	TRUE
Potri.001G050800	0.24	0.84	FALSE
Potri.001G050900	-0.94	NA	NA
Potri.001G051000	-0.0038	1	FALSE
Potri.001G051100	3.4	0.36	FALSE
Potri.001G051200	-0.01	0.94	FALSE
Potri.001G051300	0.79	0.015	TRUE
Potri.001G051400	-0.34	0.00096	TRUE
Potri.001G051500	-0.17	0.74	FALSE
Potri.001G051600	-0.053	0.92	FALSE
Potri.001G051700	0.54	4.9e-06	TRUE
Potri.001G051800	0.074	0.76	FALSE
Potri.001G051900	-0.94	5.8e-08	TRUE
Potri.001G052000	-3.3	0.27	FALSE
Potri.001G052100	-0.49	4e-05	TRUE
Potri.001G052200	-4.3	NA	NA
Potri.001G052300	0.47	0.12	FALSE
Potri.001G052400	-0.16	0.31	FALSE
Potri.001G052500	0.6	0.037	TRUE
Potri.001G052600	NA	NA	NA
Potri.001G052700	4	NA	NA
Potri.001G052800	-4.1	0.11	FALSE
Potri.001G052900	0.22	0.83	FALSE
Potri.001G053000	0.044	0.92	FALSE
Potri.001G053100	2.7	0.00085	TRUE
Potri.001G053200	0.12	0.91	FALSE
Potri.001G053300	-1.1	NA	NA
Potri.001G053400	-0.53	0.0068	TRUE
Potri.001G053500	-0.24	0.092	FALSE
Potri.001G053600	0.41	0.00035	TRUE
Potri.001G053700	0.54	0.15	FALSE
Potri.001G053800	-0.083	0.55	FALSE
Potri.001G053900	-0.21	0.88	FALSE
Potri.001G054000	0.38	0.23	FALSE
Potri.001G054100	0.39	0.41	FALSE
Potri.001G054200	-2.6	0.21	FALSE
Potri.001G054300	0.27	NA	NA
Potri.001G054400	0.14	0.6	FALSE
Potri.001G054500	-0.00021	1	FALSE
Potri.001G054600	0.71	0.049	TRUE
Potri.001G054700	0.23	0.31	FALSE
Potri.001G054800	-1	0.039	TRUE
Potri.001G054900	0.15	0.13	FALSE
Potri.001G055000	0.46	0.11	FALSE
Potri.001G055100	0.62	0.05	FALSE
Potri.001G055200	0.62	0.19	FALSE
Potri.001G055300	-0.43	0.0078	TRUE
Potri.001G055400	-0.27	0.2	FALSE
Potri.001G055500	NA	NA	NA
Potri.001G055600	-2.9	0.044	TRUE
Potri.001G055700	0.37	0.88	FALSE
Potri.001G055800	-0.2	0.93	FALSE
Potri.001G055900	0.16	0.21	FALSE
Potri.001G056000	-0.18	0.035	TRUE
Potri.001G056100	0.27	0.043	TRUE
Potri.001G056200	0.96	0.0013	TRUE
Potri.001G056300	0.92	0.02	TRUE
Potri.001G056400	-0.12	0.86	FALSE
Potri.001G056500	-0.27	0.24	FALSE
Potri.001G056600	-1	0.0026	TRUE
Potri.001G056700	-0.7	NA	NA
Potri.001G056800	-0.22	0.14	FALSE
Potri.001G056900	-0.69	0.39	FALSE
Potri.001G057000	0	NA	NA
Potri.001G057100	-0.21	0.064	FALSE
Potri.001G057200	-0.24	0.032	TRUE
Potri.001G057300	-0.22	0.52	FALSE
Potri.001G057400	-0.34	0.013	TRUE
Potri.001G057500	-0.14	0.39	FALSE
Potri.001G057600	-4.5	0.26	FALSE
Potri.001G057700	-3	0.015	TRUE
Potri.001G057800	0.33	1e-05	TRUE
Potri.001G057900	0.27	0.86	FALSE
Potri.001G058000	0.93	0.046	TRUE
Potri.001G058100	-0.89	0.00051	TRUE
Potri.001G058200	0.57	0.44	FALSE
Potri.001G058300	NA	NA	NA
Potri.001G058400	-0.061	0.98	FALSE
Potri.001G058500	-1.5	4.1e-07	TRUE
Potri.001G058600	-0.28	0.13	FALSE
Potri.001G058700	-0.053	0.63	FALSE
Potri.001G058800	-1.1	0.29	FALSE
Potri.001G058900	-0.28	0.9	FALSE
Potri.001G059000	0.29	0.4	FALSE
Potri.001G059100	1.6	0.0075	TRUE
Potri.001G059200	0.47	0.77	FALSE
Potri.001G059300	-0.062	0.94	FALSE
Potri.001G059400	0.45	0.044	TRUE
Potri.001G059500	-3.9	1.3e-19	TRUE
Potri.001G059600	0.69	0.45	FALSE
Potri.001G059700	-0.15	0.12	FALSE
Potri.001G059800	-0.22	0.71	FALSE
Potri.001G059900	0.11	0.53	FALSE
Potri.001G060000	0.4	0.025	TRUE
Potri.001G060100	-1	1.3e-10	TRUE
Potri.001G060200	0.12	0.46	FALSE
Potri.001G060300	0.65	5.8e-05	TRUE
Potri.001G060400	0.54	0.015	TRUE
Potri.001G060500	0.38	0.52	FALSE
Potri.001G060600	-1.3	0.014	TRUE
Potri.001G060700	-0.35	0.62	FALSE
Potri.001G060800	-0.61	0.00038	TRUE
Potri.001G060900	-9.5	3.4e-20	TRUE
Potri.001G061000	-0.82	2.7e-08	TRUE
Potri.001G061100	1.5	3.2e-08	TRUE
Potri.001G061200	-0.62	0.0021	TRUE
Potri.001G061300	-1.1	0.76	FALSE
Potri.001G061400	-0.12	0.28	FALSE
Potri.001G061500	-0.3	0.17	FALSE
Potri.001G061600	1.2	0.00036	TRUE
Potri.001G061700	2.1	0.0011	TRUE
Potri.001G061800	-2	4.6e-14	TRUE
Potri.001G061900	-0.23	0.4	FALSE
Potri.001G062000	-0.41	0.008	TRUE
Potri.001G062100	-0.22	0.22	FALSE
Potri.001G062200	-5.1	0.11	FALSE
Potri.001G062300	1	0.49	FALSE
Potri.001G062400	NA	NA	NA
Potri.001G062500	-1.5	0.005	TRUE
Potri.001G062600	0.13	0.58	FALSE
Potri.001G062700	0.55	0.026	TRUE
Potri.001G062800	-0.56	1.9e-09	TRUE
Potri.001G062900	-1	0.37	FALSE
Potri.001G063000	1.5	0.18	FALSE
Potri.001G063100	0.027	0.97	FALSE
Potri.001G063200	-1.1	0.76	FALSE
Potri.001G063300	7.5	0.0029	TRUE
Potri.001G063400	0	NA	NA
Potri.001G063500	-4.2	0.33	FALSE
Potri.001G063600	0	NA	NA
Potri.001G063700	-0.48	0.75	FALSE
Potri.001G063800	-0.15	0.82	FALSE
Potri.001G063900	-0.59	0.79	FALSE
Potri.001G064000	2.3	0.71	FALSE
Potri.001G064100	1.9	0.018	TRUE
Potri.001G064200	-5	0.24	FALSE
Potri.001G064300	-0.029	0.99	FALSE
Potri.001G064400	0	NA	NA
Potri.001G064500	-0.055	0.99	FALSE
Potri.001G064600	-0.65	0.79	FALSE
Potri.001G064700	-3.9	0.3	FALSE
Potri.001G064800	-2.6	NA	NA
Potri.001G064900	1.8	0.23	FALSE
Potri.001G065000	3.4	0.35	FALSE
Potri.001G065100	NA	NA	NA
Potri.001G065200	0.4	0.92	FALSE
Potri.001G065300	3.3	0.068	FALSE
Potri.001G065400	2.8	0.1	FALSE
Potri.001G065500	NA	NA	NA
Potri.001G065600	-0.11	0.55	FALSE
Potri.001G065700	-2.2	NA	NA
Potri.001G065800	0.44	0.00058	TRUE
Potri.001G065900	1.1	2.1e-07	TRUE
Potri.001G066000	0.35	0.15	FALSE
Potri.001G066100	0.19	0.35	FALSE
Potri.001G066200	0.31	0.0023	TRUE
Potri.001G066300	0	1	FALSE
Potri.001G066400	-0.06	0.95	FALSE
Potri.001G066500	0.097	0.88	FALSE
Potri.001G066600	0.62	0.093	FALSE
Potri.001G066700	0.41	0.069	FALSE
Potri.001G066800	0.36	0.0032	TRUE
Potri.001G066900	0.057	0.59	FALSE
Potri.001G067000	0.027	1	FALSE
Potri.001G067100	-2.4	0.55	FALSE
Potri.001G067200	-2.2	NA	NA
Potri.001G067300	-1.1	3.2e-08	TRUE
Potri.001G067400	0.11	0.34	FALSE
Potri.001G067500	-0.21	0.8	FALSE
Potri.001G067600	-0.39	0.48	FALSE
Potri.001G067700	0.42	0.01	TRUE
Potri.001G067800	0.35	1.8e-05	TRUE
Potri.001G067900	-0.0083	0.97	FALSE
Potri.001G068000	0.57	5.5e-06	TRUE
Potri.001G068100	1	0.00054	TRUE
Potri.001G068200	-1.2	8.7e-05	TRUE
Potri.001G068300	-0.14	0.5	FALSE
Potri.001G068400	0.45	0.042	TRUE
Potri.001G068500	0.29	0.11	FALSE
Potri.001G068600	0.22	0.69	FALSE
Potri.001G068700	0.054	0.66	FALSE
Potri.001G068800	-0.37	0.063	FALSE
Potri.001G068900	0.24	0.009	TRUE
Potri.001G069000	0.56	0.0013	TRUE
Potri.001G069100	-0.22	0.34	FALSE
Potri.001G069200	-0.81	0.1	FALSE
Potri.001G069300	0.23	0.75	FALSE
Potri.001G069400	0.36	0.49	FALSE
Potri.001G069500	0.12	0.75	FALSE
Potri.001G069600	1.2	0.0015	TRUE
Potri.001G069700	1.5	0.095	FALSE
Potri.001G069800	1	0.22	FALSE
Potri.001G069900	0.88	0.36	FALSE
Potri.001G070000	NA	NA	NA
Potri.001G070100	-0.59	0.002	TRUE
Potri.001G070200	0.55	0.16	FALSE
Potri.001G070300	0.0017	1	FALSE
Potri.001G070400	-0.59	0.0049	TRUE
Potri.001G070500	0.45	0.12	FALSE
Potri.001G070600	1.5	4.4e-06	TRUE
Potri.001G070700	-0.33	0.43	FALSE
Potri.001G070800	-1.4	2.5e-12	TRUE
Potri.001G070900	-4.3	4.7e-27	TRUE
Potri.001G071000	0.51	0.078	FALSE
Potri.001G071100	0.085	0.59	FALSE
Potri.001G071200	-0.73	0.16	FALSE
Potri.001G071300	-1.4	0.068	FALSE
Potri.001G071400	0.25	0.5	FALSE
Potri.001G071500	-0.89	0.0047	TRUE
Potri.001G071600	0.62	0.42	FALSE
Potri.001G071700	0.073	0.53	FALSE
Potri.001G071800	0	NA	NA
Potri.001G071900	0.13	0.5	FALSE
Potri.001G072000	-0.67	2.9e-06	TRUE
Potri.001G072100	0.18	0.041	TRUE
Potri.001G072200	0.19	0.014	TRUE
Potri.001G072300	0.25	0.33	FALSE
Potri.001G072400	-0.23	0.017	TRUE
Potri.001G072500	1.2	0.071	FALSE
Potri.001G072600	-0.54	1.4e-05	TRUE
Potri.001G072700	-0.3	0.0076	TRUE
Potri.001G072800	0.12	0.23	FALSE
Potri.001G072900	-5.6	0.049	TRUE
Potri.001G073000	0.073	0.77	FALSE
Potri.001G073100	-2.7	6e-13	TRUE
Potri.001G073200	-0.98	0.32	FALSE
Potri.001G073300	-0.25	0.18	FALSE
Potri.001G073400	0.06	0.64	FALSE
Potri.001G073500	0.025	0.87	FALSE
Potri.001G073600	0.54	0.021	TRUE
Potri.001G073700	0.19	0.096	FALSE
Potri.001G073800	-0.42	7.1e-05	TRUE
Potri.001G073900	-0.26	0.33	FALSE
Potri.001G074000	0.68	2.6e-06	TRUE
Potri.001G074100	1.1	0.0098	TRUE
Potri.001G074200	0.42	0.00087	TRUE
Potri.001G074300	-0.025	0.98	FALSE
Potri.001G074400	0.45	0.02	TRUE
Potri.001G074500	NA	NA	NA
Potri.001G074600	-0.038	0.92	FALSE
Potri.001G074700	0.4	0.24	FALSE
Potri.001G074800	0.65	0.29	FALSE
Potri.001G074900	-0.021	0.95	FALSE
Potri.001G075000	-0.58	0.14	FALSE
Potri.001G075100	-2.3	NA	NA
Potri.001G075200	0.65	0.086	FALSE
Potri.001G075300	0.13	0.13	FALSE
Potri.001G075400	0.49	0.48	FALSE
Potri.001G075500	0.4	0.056	FALSE
Potri.001G075600	1.2	1.5e-06	TRUE
Potri.001G075700	0.082	0.79	FALSE
Potri.001G075800	0.43	0.044	TRUE
Potri.001G075900	0.5	0.022	TRUE
Potri.001G076000	0.15	0.81	FALSE
Potri.001G076100	0	NA	NA
Potri.001G076200	0.4	0.026	TRUE
Potri.001G076300	0.15	0.76	FALSE
Potri.001G076400	0.33	0.27	FALSE
Potri.001G076500	0.89	7.5e-09	TRUE
Potri.001G076600	-1.1	0.00012	TRUE
Potri.001G076700	-0.51	0.35	FALSE
Potri.001G076800	-1.1	0.05	FALSE
Potri.001G076900	-0.8	0.58	FALSE
Potri.001G077000	-0.044	0.98	FALSE
Potri.001G077100	-0.4	0.34	FALSE
Potri.001G077200	1	0.1	FALSE
Potri.001G077300	-0.78	0.25	FALSE
Potri.001G077400	0.8	0.21	FALSE
Potri.001G077500	-1.4	0.083	FALSE
Potri.001G077600	-0.15	0.37	FALSE
Potri.001G077700	-0.39	0.34	FALSE
Potri.001G077800	1.6	0.27	FALSE
Potri.001G077900	1	0.085	FALSE
Potri.001G078000	1.1	0.0012	TRUE
Potri.001G078100	0.77	8e-08	TRUE
Potri.001G078200	-1.3	0.01	TRUE
Potri.001G078300	-1.5	1.6e-05	TRUE
Potri.001G078400	1.1	0.0036	TRUE
Potri.001G078500	-0.35	0.022	TRUE
Potri.001G078600	0.29	0.0043	TRUE
Potri.001G078700	-0.57	0.00012	TRUE
Potri.001G078800	0.31	0.27	FALSE
Potri.001G078900	0.12	0.55	FALSE
Potri.001G079000	-0.24	0.49	FALSE
Potri.001G079100	-0.033	0.9	FALSE
Potri.001G079200	0.3	0.39	FALSE
Potri.001G079300	0.2	0.031	TRUE
Potri.001G079400	-0.41	0.0036	TRUE
Potri.001G079500	-0.2	0.27	FALSE
Potri.001G079600	0.41	0.33	FALSE
Potri.001G079700	NA	NA	NA
Potri.001G079800	0.27	0.66	FALSE
Potri.001G079900	-0.69	0.013	TRUE
Potri.001G080000	-0.93	0.83	FALSE
Potri.001G080100	-2.6	NA	NA
Potri.001G080200	0.13	0.23	FALSE
Potri.001G080300	NA	NA	NA
Potri.001G080400	-0.22	1.6e-05	TRUE
Potri.001G080500	NA	NA	NA
Potri.001G080600	-3.2	0.00066	TRUE
Potri.001G080700	-1.9	0.0002	TRUE
Potri.001G080800	-2.2	0.12	FALSE
Potri.001G080900	-1.3	0.1	FALSE
Potri.001G081000	0.89	0.88	FALSE
Potri.001G081100	0.4	0.036	TRUE
Potri.001G081200	0.078	0.92	FALSE
Potri.001G081300	0.021	0.93	FALSE
Potri.001G081400	0.52	0.055	FALSE
Potri.001G081500	0.39	0.53	FALSE
Potri.001G081600	0.037	0.77	FALSE
Potri.001G081700	0	NA	NA
Potri.001G081800	NA	NA	NA
Potri.001G081900	0.12	0.2	FALSE
Potri.001G082000	-0.13	0.18	FALSE
Potri.001G082100	0.019	0.9	FALSE
Potri.001G082200	0.91	0.0023	TRUE
Potri.001G082300	0.43	0.16	FALSE
Potri.001G082400	0.67	0.32	FALSE
Potri.001G082500	0.72	0.0021	TRUE
Potri.001G082600	0.27	0.47	FALSE
Potri.001G082700	1.1	5.2e-05	TRUE
Potri.001G082800	-0.53	0.021	TRUE
Potri.001G082900	0.32	0.23	FALSE
Potri.001G083000	-0.16	0.9	FALSE
Potri.001G083100	-0.15	0.094	FALSE
Potri.001G083200	1	0.1	FALSE
Potri.001G083300	0.48	0.46	FALSE
Potri.001G083400	0.43	0.18	FALSE
Potri.001G083500	-5	4e-13	TRUE
Potri.001G083600	0.83	0.023	TRUE
Potri.001G083700	-4.3	6.7e-12	TRUE
Potri.001G083800	-0.35	0.015	TRUE
Potri.001G083900	0.0049	1	FALSE
Potri.001G084000	-1.3	4.6e-06	TRUE
Potri.001G084100	2.5	0.0008	TRUE
Potri.001G084200	-0.78	0.013	TRUE
Potri.001G084300	0.85	1.1e-16	TRUE
Potri.001G084400	1.8	3.5e-16	TRUE
Potri.001G084500	0.57	0.019	TRUE
Potri.001G084600	0.17	0.7	FALSE
Potri.001G084700	0.25	0.007	TRUE
Potri.001G084800	0.86	0.66	FALSE
Potri.001G084900	0.21	0.51	FALSE
Potri.001G085000	0.1	0.79	FALSE
Potri.001G085100	-0.16	0.71	FALSE
Potri.001G085200	-0.04	0.7	FALSE
Potri.001G085300	NA	NA	NA
Potri.001G085400	0.39	0.0083	TRUE
Potri.001G085500	-0.55	0.00017	TRUE
Potri.001G085600	-0.22	0.0043	TRUE
Potri.001G085700	-1.5	0.41	FALSE
Potri.001G085800	0.91	0.39	FALSE
Potri.001G085900	-0.077	0.84	FALSE
Potri.001G086000	0.45	0.088	FALSE
Potri.001G086100	-0.18	0.2	FALSE
Potri.001G086200	NA	NA	NA
Potri.001G086300	0.28	0.0032	TRUE
Potri.001G086400	-0.3	0.042	TRUE
Potri.001G086500	NA	NA	NA
Potri.001G086600	0.027	0.86	FALSE
Potri.001G086700	-0.3	0.57	FALSE
Potri.001G086800	0.4	0.00046	TRUE
Potri.001G086900	1.1	2.4e-08	TRUE
Potri.001G087000	-1	0.38	FALSE
Potri.001G087100	0.22	0.019	TRUE
Potri.001G087200	-0.15	0.28	FALSE
Potri.001G087300	-0.16	0.019	TRUE
Potri.001G087400	-0.33	0.044	TRUE
Potri.001G087500	0.073	0.7	FALSE
Potri.001G087600	-0.18	0.037	TRUE
Potri.001G087700	0.2	0.52	FALSE
Potri.001G087800	0.075	0.59	FALSE
Potri.001G087900	-0.39	0.13	FALSE
Potri.001G088000	0.08	0.55	FALSE
Potri.001G088100	0.51	0.018	TRUE
Potri.001G088200	-0.18	0.048	TRUE
Potri.001G088300	-0.095	0.55	FALSE
Potri.001G088400	0.1	0.76	FALSE
Potri.001G088500	2.4	0.54	FALSE
Potri.001G088600	0.69	3.2e-05	TRUE
Potri.001G088700	-1.2	0.0058	TRUE
Potri.001G088800	-0.64	4.9e-05	TRUE
Potri.001G088900	-1.4	0.29	FALSE
Potri.001G089000	0.3	0.47	FALSE
Potri.001G089100	0.44	1.2e-10	TRUE
Potri.001G089200	-0.71	0.72	FALSE
Potri.001G089300	0.16	0.12	FALSE
Potri.001G089400	-0.031	0.85	FALSE
Potri.001G089500	0.26	0.64	FALSE
Potri.001G089600	-0.096	0.43	FALSE
Potri.001G089700	-0.36	0.083	FALSE
Potri.001G089800	0.21	0.01	TRUE
Potri.001G089900	0.13	0.21	FALSE
Potri.001G090000	0.056	0.8	FALSE
Potri.001G090100	0.017	0.97	FALSE
Potri.001G090200	0.56	5.5e-05	TRUE
Potri.001G090300	0.094	0.66	FALSE
Potri.001G090400	0.59	0.075	FALSE
Potri.001G090500	0.88	3.7e-07	TRUE
Potri.001G090600	0.042	0.66	FALSE
Potri.001G090700	-2.2	3.4e-09	TRUE
Potri.001G090800	-0.44	0.19	FALSE
Potri.001G090900	-0.36	0.00051	TRUE
Potri.001G091000	-0.037	0.86	FALSE
Potri.001G091100	-1.1	5e-16	TRUE
Potri.001G091200	NA	NA	NA
Potri.001G091300	0.74	0.00021	TRUE
Potri.001G091400	-2.2	0.003	TRUE
Potri.001G091500	-0.21	0.62	FALSE
Potri.001G091600	-0.33	0.0037	TRUE
Potri.001G091700	0.22	0.31	FALSE
Potri.001G091800	-0.086	0.52	FALSE
Potri.001G091900	-0.19	0.15	FALSE
Potri.001G092000	-0.47	0.0023	TRUE
Potri.001G092100	-4.3	7.7e-15	TRUE
Potri.001G092200	0.18	0.69	FALSE
Potri.001G092300	0.16	0.13	FALSE
Potri.001G092400	-0.21	0.68	FALSE
Potri.001G092500	0.94	1.5e-11	TRUE
Potri.001G092600	-1.2	2.7e-08	TRUE
Potri.001G092700	0.032	0.98	FALSE
Potri.001G092800	0.39	0.026	TRUE
Potri.001G092900	-0.36	0.63	FALSE
Potri.001G093000	0.41	0.093	FALSE
Potri.001G093100	0.14	0.75	FALSE
Potri.001G093200	NA	NA	NA
Potri.001G093300	-0.28	0.54	FALSE
Potri.001G093400	-3.4	0.38	FALSE
Potri.001G093500	-0.64	0.0011	TRUE
Potri.001G093600	-0.36	0.043	TRUE
Potri.001G093700	0.31	0.3	FALSE
Potri.001G093800	0.23	0.11	FALSE
Potri.001G093900	0.43	0.05	FALSE
Potri.001G094000	-0.85	0.48	FALSE
Potri.001G094100	-0.39	2.2e-05	TRUE
Potri.001G094200	-0.31	0.027	TRUE
Potri.001G094300	0.2	0.66	FALSE
Potri.001G094400	-0.039	0.75	FALSE
Potri.001G094500	0.12	0.42	FALSE
Potri.001G094600	0.45	0.0033	TRUE
Potri.001G094700	-0.17	0.63	FALSE
Potri.001G094800	0.51	0.16	FALSE
Potri.001G094900	0.11	0.49	FALSE
Potri.001G095000	NA	NA	NA
Potri.001G095100	NA	NA	NA
Potri.001G095200	0.72	9.9e-07	TRUE
Potri.001G095300	0.051	0.78	FALSE
Potri.001G095400	7.3	0.0047	TRUE
Potri.001G095500	0.044	0.77	FALSE
Potri.001G095600	0.23	0.4	FALSE
Potri.001G095700	2.5	NA	NA
Potri.001G095800	0.077	0.61	FALSE
Potri.001G095900	-1.1	NA	NA
Potri.001G096000	0.56	0.15	FALSE
Potri.001G096100	0.066	0.63	FALSE
Potri.001G096200	0.57	0.012	TRUE
Potri.001G096300	-1.5	0.59	FALSE
Potri.001G096400	0.46	0.046	TRUE
Potri.001G096500	0.79	0.057	FALSE
Potri.001G096600	0.93	0.21	FALSE
Potri.001G096700	0.52	0.46	FALSE
Potri.001G096800	0.82	0.06	FALSE
Potri.001G096900	0.75	0.0033	TRUE
Potri.001G097000	NA	NA	NA
Potri.001G097100	0.51	0.73	FALSE
Potri.001G097200	0.52	0.0021	TRUE
Potri.001G097300	2.7	0.0056	TRUE
Potri.001G097400	0.12	0.25	FALSE
Potri.001G097500	-0.3	0.021	TRUE
Potri.001G097600	-1.2	3.8e-05	TRUE
Potri.001G097700	-1.4	7.6e-30	TRUE
Potri.001G097800	0.42	0.011	TRUE
Potri.001G097900	1.9	0.19	FALSE
Potri.001G098000	0.64	0.04	TRUE
Potri.001G098100	0.57	0.25	FALSE
Potri.001G098200	-1	0.71	FALSE
Potri.001G098300	0.79	4.4e-06	TRUE
Potri.001G098400	0.022	0.98	FALSE
Potri.001G098500	-0.16	0.089	FALSE
Potri.001G098600	0.12	0.22	FALSE
Potri.001G098700	0.22	0.074	FALSE
Potri.001G098800	1.3	3.2e-09	TRUE
Potri.001G098900	1.1	0.32	FALSE
Potri.001G099000	-0.64	0.26	FALSE
Potri.001G099100	0.11	0.84	FALSE
Potri.001G099200	-0.084	0.52	FALSE
Potri.001G099300	-0.1	0.65	FALSE
Potri.001G099400	-0.4	0.44	FALSE
Potri.001G099500	-0.65	0.59	FALSE
Potri.001G099600	-0.12	0.29	FALSE
Potri.001G099700	0.58	0.006	TRUE
Potri.001G099800	0.83	0.024	TRUE
Potri.001G099900	0.081	0.78	FALSE
Potri.001G100000	0.36	0.17	FALSE
Potri.001G100100	0.026	0.95	FALSE
Potri.001G100200	-1.9	0.0041	TRUE
Potri.001G100300	0.083	0.74	FALSE
Potri.001G100400	-2.6	NA	NA
Potri.001G100500	-0.14	0.64	FALSE
Potri.001G100600	0.4	0.1	FALSE
Potri.001G100700	0.65	0.0004	TRUE
Potri.001G100800	0.59	0.0012	TRUE
Potri.001G100900	0.26	0.25	FALSE
Potri.001G101000	-0.27	0.48	FALSE
Potri.001G101100	0.44	0.00021	TRUE
Potri.001G101200	0.62	0.14	FALSE
Potri.001G101300	-0.26	3e-06	TRUE
Potri.001G101400	0.094	0.48	FALSE
Potri.001G101500	0.34	0.43	FALSE
Potri.001G101600	0.82	3.6e-06	TRUE
Potri.001G101700	-1.1	4e-11	TRUE
Potri.001G101800	0.079	0.7	FALSE
Potri.001G101900	-0.37	0.0058	TRUE
Potri.001G102000	-0.018	0.97	FALSE
Potri.001G102100	0.036	0.85	FALSE
Potri.001G102200	-0.88	1.1e-05	TRUE
Potri.001G102300	0.32	0.57	FALSE
Potri.001G102400	-1.2	0.079	FALSE
Potri.001G102500	-0.053	0.91	FALSE
Potri.001G102600	0.76	0.0015	TRUE
Potri.001G102700	4.4	NA	NA
Potri.001G102800	NA	NA	NA
Potri.001G102900	0.68	1.6e-08	TRUE
Potri.001G103000	1.3	0.022	TRUE
Potri.001G103100	0.26	0.22	FALSE
Potri.001G103200	-1.1	0.48	FALSE
Potri.001G103300	0.48	0.011	TRUE
Potri.001G103400	-0.054	0.9	FALSE
Potri.001G103500	-2.5	NA	NA
Potri.001G103600	0.19	0.45	FALSE
Potri.001G103700	0.074	0.84	FALSE
Potri.001G103800	-0.2	0.12	FALSE
Potri.001G103900	-2.4	0.43	FALSE
Potri.001G104000	-0.24	0.032	TRUE
Potri.001G104100	-5.2	0.41	FALSE
Potri.001G104200	0.48	0.025	TRUE
Potri.001G104300	-0.27	0.002	TRUE
Potri.001G104400	-2	1.4e-37	TRUE
Potri.001G104500	-0.16	0.32	FALSE
Potri.001G104600	0.036	0.94	FALSE
Potri.001G104700	-0.23	0.046	TRUE
Potri.001G104800	0.13	0.51	FALSE
Potri.001G104900	0.55	0.0025	TRUE
Potri.001G105000	-0.64	0.63	FALSE
Potri.001G105100	0.42	0.00052	TRUE
Potri.001G105200	-2.7	9.8e-34	TRUE
Potri.001G105300	-0.048	0.95	FALSE
Potri.001G105400	0.024	0.95	FALSE
Potri.001G105500	-2.5	NA	NA
Potri.001G105600	-0.12	0.35	FALSE
Potri.001G105700	0	NA	NA
Potri.001G105800	-0.46	0.2	FALSE
Potri.001G105900	-1.6	1e-17	TRUE
Potri.001G106000	-0.0039	0.99	FALSE
Potri.001G106100	0.63	0.044	TRUE
Potri.001G106200	-1.2	0.37	FALSE
Potri.001G106300	-0.62	0.35	FALSE
Potri.001G106400	-0.88	8.1e-05	TRUE
Potri.001G106500	-0.14	0.93	FALSE
Potri.001G106600	0.65	0.00012	TRUE
Potri.001G106700	0.29	0.46	FALSE
Potri.001G106800	-0.23	0.74	FALSE
Potri.001G106900	0.61	0.54	FALSE
Potri.001G107000	0.27	0.29	FALSE
Potri.001G107100	-1.6	0.21	FALSE
Potri.001G107200	0.11	0.58	FALSE
Potri.001G107300	0.4	0.00094	TRUE
Potri.001G107400	0.35	0.4	FALSE
Potri.001G107500	-0.13	0.14	FALSE
Potri.001G107600	0.82	0.0043	TRUE
Potri.001G107700	NA	NA	NA
Potri.001G107800	-2.5	0.092	FALSE
Potri.001G107900	-2.2	0.71	FALSE
Potri.001G108000	NA	NA	NA
Potri.001G108100	-0.65	0.00072	TRUE
Potri.001G108200	0.2	0.17	FALSE
Potri.001G108300	1.2	2.4e-06	TRUE
Potri.001G108400	0.2	0.063	FALSE
Potri.001G108500	0	1	FALSE
Potri.001G108600	0.62	0.08	FALSE
Potri.001G108700	0.22	0.19	FALSE
Potri.001G108800	-1.1	0.00098	TRUE
Potri.001G108900	-0.85	0.49	FALSE
Potri.001G109000	-0.031	0.97	FALSE
Potri.001G109100	0.57	0.005	TRUE
Potri.001G109200	0.12	0.27	FALSE
Potri.001G109300	3	0.49	FALSE
Potri.001G109400	0.45	0.038	TRUE
Potri.001G109500	-0.059	0.37	FALSE
Potri.001G109600	0.0015	1	FALSE
Potri.001G109700	-0.23	0.74	FALSE
Potri.001G109800	0.037	0.92	FALSE
Potri.001G109900	-1.2	0.13	FALSE
Potri.001G110000	-0.087	0.48	FALSE
Potri.001G110100	0.17	0.22	FALSE
Potri.001G110200	0.25	0.059	FALSE
Potri.001G110300	1.2	0.0018	TRUE
Potri.001G110400	0.082	0.96	FALSE
Potri.001G110500	-0.73	0.57	FALSE
Potri.001G110600	NA	NA	NA
Potri.001G110700	-1.2	0.21	FALSE
Potri.001G110800	-0.15	0.92	FALSE
Potri.001G110900	1.2	0.00043	TRUE
Potri.001G111000	0.72	1.4e-10	TRUE
Potri.001G111100	-0.16	0.053	FALSE
Potri.001G111200	-0.39	0.73	FALSE
Potri.001G111300	1	6.3e-07	TRUE
Potri.001G111400	-1.1	3.9e-09	TRUE
Potri.001G111500	-0.78	0.19	FALSE
Potri.001G111600	0.27	0.36	FALSE
Potri.001G111700	0.51	0.002	TRUE
Potri.001G111800	-0.32	0.0044	TRUE
Potri.001G111900	-2	0.52	FALSE
Potri.001G112000	-0.28	0.028	TRUE
Potri.001G112100	-1.3	0.00026	TRUE
Potri.001G112200	-0.014	0.95	FALSE
Potri.001G112300	-0.31	2.1e-05	TRUE
Potri.001G112400	0.31	0.21	FALSE
Potri.001G112500	0.8	0.053	FALSE
Potri.001G112600	-0.24	0.43	FALSE
Potri.001G112700	-0.14	0.1	FALSE
Potri.001G112800	0.9	0.024	TRUE
Potri.001G112900	-0.22	0.54	FALSE
Potri.001G113000	-1	0.48	FALSE
Potri.001G113100	0.24	0.64	FALSE
Potri.001G113200	-0.51	0.00043	TRUE
Potri.001G113300	-0.39	0.0022	TRUE
Potri.001G113400	0.39	0.22	FALSE
Potri.001G113500	0.18	0.061	FALSE
Potri.001G113600	-0.29	0.00019	TRUE
Potri.001G113700	NA	NA	NA
Potri.001G113800	-0.086	0.57	FALSE
Potri.001G113900	-7	1.1e-35	TRUE
Potri.001G114000	-0.95	0.14	FALSE
Potri.001G114100	0.28	0.25	FALSE
Potri.001G114200	-2.5	0.52	FALSE
Potri.001G114300	-1.1	0.58	FALSE
Potri.001G114400	0.39	0.022	TRUE
Potri.001G114500	0.26	0.38	FALSE
Potri.001G114600	0.32	0.039	TRUE
Potri.001G114700	2.4	0.083	FALSE
Potri.001G114800	0.51	0.0059	TRUE
Potri.001G114900	1.5	0.0036	TRUE
Potri.001G115000	-0.6	4.4e-05	TRUE
Potri.001G115100	0.61	0.0035	TRUE
Potri.001G115200	-0.27	0.4	FALSE
Potri.001G115300	0.6	0.84	FALSE
Potri.001G115400	-1.1	0.22	FALSE
Potri.001G115500	0.094	0.43	FALSE
Potri.001G115600	0.68	4e-06	TRUE
Potri.001G115700	NA	NA	NA
Potri.001G115800	-0.0096	0.99	FALSE
Potri.001G115900	-0.05	0.74	FALSE
Potri.001G116000	0.11	0.41	FALSE
Potri.001G116100	-0.66	3.5e-06	TRUE
Potri.001G116200	-0.24	0.8	FALSE
Potri.001G116300	0.3	0.63	FALSE
Potri.001G116400	1.7	0.24	FALSE
Potri.001G116500	0.032	0.92	FALSE
Potri.001G116600	0.88	5.5e-05	TRUE
Potri.001G116700	0.025	0.97	FALSE
Potri.001G116800	0.015	0.98	FALSE
Potri.001G116900	0.31	0.00024	TRUE
Potri.001G117000	-0.64	0.32	FALSE
Potri.001G117100	0.1	0.59	FALSE
Potri.001G117200	-0.093	0.25	FALSE
Potri.001G117300	NA	NA	NA
Potri.001G117400	-0.44	2.1e-09	TRUE
Potri.001G117500	0.41	0.011	TRUE
Potri.001G117600	-0.61	0.055	FALSE
Potri.001G117700	-0.32	0.003	TRUE
Potri.001G117800	0.42	0.028	TRUE
Potri.001G117900	0.14	0.32	FALSE
Potri.001G118000	-0.35	0.0002	TRUE
Potri.001G118100	-0.009	0.98	FALSE
Potri.001G118200	1.1	5.7e-05	TRUE
Potri.001G118300	-0.21	0.46	FALSE
Potri.001G118400	-0.023	0.99	FALSE
Potri.001G118500	0.47	0.061	FALSE
Potri.001G118600	-3.6	NA	NA
Potri.001G118700	-0.13	0.15	FALSE
Potri.001G118800	-2.1	8.2e-07	TRUE
Potri.001G118900	0.063	0.6	FALSE
Potri.001G119000	-1	0.013	TRUE
Potri.001G119100	0.21	0.27	FALSE
Potri.001G119200	-1.7	0.62	FALSE
Potri.001G119300	-0.11	0.86	FALSE
Potri.001G119400	NA	NA	NA
Potri.001G119500	0.26	0.076	FALSE
Potri.001G119600	NA	NA	NA
Potri.001G119700	0.13	0.34	FALSE
Potri.001G119800	0.12	0.66	FALSE
Potri.001G119900	-1.9	0.023	TRUE
Potri.001G120000	-0.74	0.00079	TRUE
Potri.001G120100	0	NA	NA
Potri.001G120200	-3.4	0.27	FALSE
Potri.001G120300	0.35	0.15	FALSE
Potri.001G120400	0.22	0.0028	TRUE
Potri.001G120500	-0.52	0.032	TRUE
Potri.001G120600	-0.93	0.14	FALSE
Potri.001G120700	0.49	0.51	FALSE
Potri.001G120800	0.4	0.0046	TRUE
Potri.001G120900	0.12	0.24	FALSE
Potri.001G121000	0.027	0.92	FALSE
Potri.001G121100	-0.64	9.4e-05	TRUE
Potri.001G121200	0.48	4.7e-05	TRUE
Potri.001G121300	0.22	0.39	FALSE
Potri.001G121400	0.52	0.065	FALSE
Potri.001G121500	NA	NA	NA
Potri.001G121600	0.72	0.018	TRUE
Potri.001G121700	0.38	0.04	TRUE
Potri.001G121800	-0.14	0.84	FALSE
Potri.001G121900	-0.15	0.79	FALSE
Potri.001G122000	NA	NA	NA
Potri.001G122100	-0.45	0.51	FALSE
Potri.001G122200	0.022	0.94	FALSE
Potri.001G122300	2.3	NA	NA
Potri.001G122400	0.2	0.48	FALSE
Potri.001G122500	-0.71	0.0033	TRUE
Potri.001G122600	0	1	FALSE
Potri.001G122700	-0.46	9.2e-05	TRUE
Potri.001G122800	0.26	0.078	FALSE
Potri.001G122900	NA	NA	NA
Potri.001G123000	-0.16	0.67	FALSE
Potri.001G123100	1.5	6.7e-10	TRUE
Potri.001G123200	-0.13	0.14	FALSE
Potri.001G123300	0.64	0.074	FALSE
Potri.001G123400	-0.075	0.66	FALSE
Potri.001G123500	0.16	0.15	FALSE
Potri.001G123600	0.17	0.25	FALSE
Potri.001G123700	0.37	0.034	TRUE
Potri.001G123800	1.4	2.1e-18	TRUE
Potri.001G123900	1.7	0.019	TRUE
Potri.001G124000	-0.043	0.74	FALSE
Potri.001G124100	-0.32	0.023	TRUE
Potri.001G124200	3.4	6.2e-91	TRUE
Potri.001G124300	-0.19	0.015	TRUE
Potri.001G124400	-1.2	0.38	FALSE
Potri.001G124500	0.36	0.00032	TRUE
Potri.001G124600	NA	NA	NA
Potri.001G124700	0.77	0.19	FALSE
Potri.001G124800	NA	NA	NA
Potri.001G124900	0.56	6.7e-07	TRUE
Potri.001G125000	0.45	0.034	TRUE
Potri.001G125100	-0.63	0.27	FALSE
Potri.001G125200	-0.05	0.82	FALSE
Potri.001G125300	-0.77	NA	NA
Potri.001G125400	-0.16	0.77	FALSE
Potri.001G125500	-1.8	0.15	FALSE
Potri.001G125600	0.79	NA	NA
Potri.001G125700	0.36	0.0014	TRUE
Potri.001G125800	0.14	0.45	FALSE
Potri.001G125900	0	NA	NA
Potri.001G126000	-0.086	0.93	FALSE
Potri.001G126100	0.92	0.00092	TRUE
Potri.001G126200	0.36	0.018	TRUE
Potri.001G126300	0.085	0.92	FALSE
Potri.001G126400	-0.13	0.33	FALSE
Potri.001G126500	-0.22	0.011	TRUE
Potri.001G126600	NA	NA	NA
Potri.001G126700	0.59	0.29	FALSE
Potri.001G126800	1.1	0.36	FALSE
Potri.001G126900	NA	NA	NA
Potri.001G127000	0.65	0.0072	TRUE
Potri.001G127100	0.67	0.00044	TRUE
Potri.001G127200	-1.5	0.39	FALSE
Potri.001G127300	0.73	5.6e-05	TRUE
Potri.001G127400	0.28	0.74	FALSE
Potri.001G127500	-3.2	0.068	FALSE
Potri.001G127600	-2.1	7.7e-09	TRUE
Potri.001G127700	0.5	0.59	FALSE
Potri.001G127800	-0.052	0.91	FALSE
Potri.001G127900	-0.18	0.68	FALSE
Potri.001G128000	-2.2	NA	NA
Potri.001G128100	0.29	0.58	FALSE
Potri.001G128200	-1.3	1.7e-13	TRUE
Potri.001G128300	0.0086	1	FALSE
Potri.001G128400	2.3	0.0052	TRUE
Potri.001G128500	0.14	0.76	FALSE
Potri.001G128600	0.24	0.28	FALSE
Potri.001G128700	0.027	0.85	FALSE
Potri.001G128800	-0.14	0.17	FALSE
Potri.001G128900	NA	NA	NA
Potri.001G129000	0.76	8.5e-06	TRUE
Potri.001G129100	0.0033	0.99	FALSE
Potri.001G129200	-3.2	0.37	FALSE
Potri.001G129300	NA	NA	NA
Potri.001G129400	0.066	0.91	FALSE
Potri.001G129500	-0.36	0.034	TRUE
Potri.001G129600	0.18	0.034	TRUE
Potri.001G129700	0.12	0.47	FALSE
Potri.001G129800	-0.29	0.02	TRUE
Potri.001G129900	-0.93	1.3e-23	TRUE
Potri.001G130000	1	0.38	FALSE
Potri.001G130100	0.37	0.15	FALSE
Potri.001G130200	-0.93	2.3e-05	TRUE
Potri.001G130300	NA	NA	NA
Potri.001G130400	0.23	0.27	FALSE
Potri.001G130500	0.13	0.25	FALSE
Potri.001G130600	0.026	0.96	FALSE
Potri.001G130700	-0.031	0.93	FALSE
Potri.001G130800	0.56	0.16	FALSE
Potri.001G130900	-0.062	0.71	FALSE
Potri.001G131000	-0.15	0.31	FALSE
Potri.001G131100	-4.6	0.23	FALSE
Potri.001G131200	NA	NA	NA
Potri.001G131300	-0.66	4.8e-07	TRUE
Potri.001G131400	-0.7	7.2e-06	TRUE
Potri.001G131500	0.38	0.25	FALSE
Potri.001G131600	0.55	0.17	FALSE
Potri.001G131700	0.8	0.17	FALSE
Potri.001G131800	0.27	0.3	FALSE
Potri.001G131900	NA	NA	NA
Potri.001G132000	-0.58	0.012	TRUE
Potri.001G132100	-0.68	0.3	FALSE
Potri.001G132200	-0.38	0.82	FALSE
Potri.001G132300	NA	NA	NA
Potri.001G132400	0.21	0.085	FALSE
Potri.001G132500	-0.23	0.59	FALSE
Potri.001G132600	0.055	0.74	FALSE
Potri.001G132700	0.071	0.45	FALSE
Potri.001G132800	-0.41	0.0036	TRUE
Potri.001G132900	-0.087	0.47	FALSE
Potri.001G133000	-2.1	3.3e-20	TRUE
Potri.001G133100	-0.13	0.85	FALSE
Potri.001G133200	-1.4	4.2e-07	TRUE
Potri.001G133300	-2	3.8e-08	TRUE
Potri.001G133400	-0.35	0.17	FALSE
Potri.001G133500	0.29	0.066	FALSE
Potri.001G133600	0.21	0.15	FALSE
Potri.001G133700	2.5	NA	NA
Potri.001G133800	0.31	0.26	FALSE
Potri.001G133900	0.55	0.012	TRUE
Potri.001G134000	-0.64	0.19	FALSE
Potri.001G134100	-0.26	0.022	TRUE
Potri.001G134200	NA	NA	NA
Potri.001G134300	0.51	0.098	FALSE
Potri.001G134400	1.5	0.27	FALSE
Potri.001G134500	0.86	0.0081	TRUE
Potri.001G134600	-1.2	0.36	FALSE
Potri.001G134700	0.67	0.16	FALSE
Potri.001G134800	-0.031	0.87	FALSE
Potri.001G134900	0.73	0.084	FALSE
Potri.001G135000	-0.38	5e-05	TRUE
Potri.001G135100	0.99	0.00016	TRUE
Potri.001G135200	-0.021	0.8	FALSE
Potri.001G135300	0.47	0.00022	TRUE
Potri.001G135400	0.65	0.00057	TRUE
Potri.001G135500	0.27	0.07	FALSE
Potri.001G135600	NA	NA	NA
Potri.001G135700	-0.014	0.92	FALSE
Potri.001G135800	-0.16	0.48	FALSE
Potri.001G135900	-0.28	0.09	FALSE
Potri.001G136000	0.074	0.92	FALSE
Potri.001G136100	-0.83	0.016	TRUE
Potri.001G136200	0.16	0.62	FALSE
Potri.001G136300	0.027	0.84	FALSE
Potri.001G136400	0.28	0.17	FALSE
Potri.001G136500	-0.31	0.64	FALSE
Potri.001G136600	-0.4	0.084	FALSE
Potri.001G136700	1.1	0.58	FALSE
Potri.001G136800	-0.018	0.92	FALSE
Potri.001G136900	-0.19	0.24	FALSE
Potri.001G137000	-0.061	0.68	FALSE
Potri.001G137100	-2	0.00038	TRUE
Potri.001G137200	-0.3	0.0029	TRUE
Potri.001G137300	NA	NA	NA
Potri.001G137400	-0.88	0.63	FALSE
Potri.001G137500	-0.38	0.069	FALSE
Potri.001G137600	0.66	1.1e-05	TRUE
Potri.001G137700	-0.55	0.021	TRUE
Potri.001G137800	0.76	0.1	FALSE
Potri.001G137900	0.28	0.012	TRUE
Potri.001G138000	-0.039	0.93	FALSE
Potri.001G138100	-0.18	0.35	FALSE
Potri.001G138200	-0.16	0.79	FALSE
Potri.001G138300	1.2	2.4e-07	TRUE
Potri.001G138400	-0.11	0.38	FALSE
Potri.001G138500	-0.098	0.35	FALSE
Potri.001G138600	-0.28	0.91	FALSE
Potri.001G138700	0.25	0.29	FALSE
Potri.001G138800	0.79	0.016	TRUE
Potri.001G138900	0.13	0.26	FALSE
Potri.001G139000	-3.6	NA	NA
Potri.001G139100	0.43	0.018	TRUE
Potri.001G139200	0.0077	0.99	FALSE
Potri.001G139300	0.38	0.037	TRUE
Potri.001G139400	-0.21	0.13	FALSE
Potri.001G139500	0.71	2.7e-05	TRUE
Potri.001G139600	1.3	0.0031	TRUE
Potri.001G139700	2.7	0.052	FALSE
Potri.001G139800	0.37	2.6e-07	TRUE
Potri.001G139900	0.097	0.74	FALSE
Potri.001G140000	-0.31	0.43	FALSE
Potri.001G140100	NA	NA	NA
Potri.001G140200	-0.65	0.0067	TRUE
Potri.001G140300	-0.45	2.1e-06	TRUE
Potri.001G140400	-1.9	0.22	FALSE
Potri.001G140500	0.067	0.77	FALSE
Potri.001G140600	0.21	0.016	TRUE
Potri.001G140700	0.18	0.57	FALSE
Potri.001G140800	-0.12	0.28	FALSE
Potri.001G140900	0.75	0.17	FALSE
Potri.001G141000	NA	NA	NA
Potri.001G141100	0.5	0.17	FALSE
Potri.001G141200	0.39	0.09	FALSE
Potri.001G141300	0.017	0.96	FALSE
Potri.001G141400	0.39	0.13	FALSE
Potri.001G141500	-0.21	0.39	FALSE
Potri.001G141600	-0.087	0.76	FALSE
Potri.001G141700	-2.1	1.1e-11	TRUE
Potri.001G141800	-0.28	0.58	FALSE
Potri.001G141900	0	1	FALSE
Potri.001G142000	0.18	0.46	FALSE
Potri.001G142100	-0.46	7.4e-12	TRUE
Potri.001G142200	0.51	0.035	TRUE
Potri.001G142300	-0.13	0.52	FALSE
Potri.001G142400	-0.31	0.2	FALSE
Potri.001G142500	-0.55	0.0021	TRUE
Potri.001G142600	-0.062	0.79	FALSE
Potri.001G142700	-0.22	0.75	FALSE
Potri.001G142800	0.3	0.65	FALSE
Potri.001G142900	0	NA	NA
Potri.001G143000	NA	NA	NA
Potri.001G143100	NA	NA	NA
Potri.001G143200	0.12	0.36	FALSE
Potri.001G143300	NA	NA	NA
Potri.001G143400	-0.054	0.78	FALSE
Potri.001G143500	0.3	0.037	TRUE
Potri.001G143600	-0.32	0.0025	TRUE
Potri.001G143700	-6.3	0.027	TRUE
Potri.001G143800	-0.27	0.0039	TRUE
Potri.001G143900	-0.2	0.73	FALSE
Potri.001G144000	0.075	0.52	FALSE
Potri.001G144100	-0.37	0.14	FALSE
Potri.001G144200	0.11	0.57	FALSE
Potri.001G144300	-0.32	0.31	FALSE
Potri.001G144400	0.27	0.48	FALSE
Potri.001G144500	-0.16	0.093	FALSE
Potri.001G144600	1.1	0.73	FALSE
Potri.001G144700	0.23	0.099	FALSE
Potri.001G144800	0.037	0.94	FALSE
Potri.001G144900	-2.5	0.52	FALSE
Potri.001G145000	0	NA	NA
Potri.001G145100	-0.39	0.083	FALSE
Potri.001G145200	0.87	0.00078	TRUE
Potri.001G145300	0.63	0.00069	TRUE
Potri.001G145400	0.055	0.75	FALSE
Potri.001G145500	0.041	0.78	FALSE
Potri.001G145600	NA	NA	NA
Potri.001G145700	-0.46	0.13	FALSE
Potri.001G145800	-0.27	0.48	FALSE
Potri.001G145900	-1.3	2.3e-06	TRUE
Potri.001G146000	0.31	0.22	FALSE
Potri.001G146100	-0.45	7.5e-07	TRUE
Potri.001G146200	-1.2	3.8e-05	TRUE
Potri.001G146300	0	NA	NA
Potri.001G146400	0.16	0.13	FALSE
Potri.001G146500	-0.065	0.61	FALSE
Potri.001G146600	0.077	0.8	FALSE
Potri.001G146700	0.26	0.2	FALSE
Potri.001G146800	0.89	1.3e-05	TRUE
Potri.001G146900	0.45	2.9e-06	TRUE
Potri.001G147000	-0.5	7.6e-06	TRUE
Potri.001G147100	-0.45	0.43	FALSE
Potri.001G147200	-2.5	2.3e-09	TRUE
Potri.001G147300	1.6	3.9e-11	TRUE
Potri.001G147400	-0.93	2.7e-05	TRUE
Potri.001G147500	0.37	0.035	TRUE
Potri.001G147600	-0.1	0.83	FALSE
Potri.001G147700	0.54	0.037	TRUE
Potri.001G147800	3.4	NA	NA
Potri.001G147900	2.5	NA	NA
Potri.001G148000	-0.25	0.011	TRUE
Potri.001G148100	-0.27	0.03	TRUE
Potri.001G148200	0.64	0.036	TRUE
Potri.001G148300	0.23	0.12	FALSE
Potri.001G148400	-0.38	0.1	FALSE
Potri.001G148500	-0.21	0.33	FALSE
Potri.001G148600	-1.1	1.9e-11	TRUE
Potri.001G148700	0.39	0.0011	TRUE
Potri.001G148800	0.47	0.018	TRUE
Potri.001G148900	-3.4	4.5e-18	TRUE
Potri.001G149000	-3.5	0.36	FALSE
Potri.001G149100	-2.6	9.5e-27	TRUE
Potri.001G149200	-0.57	5.6e-05	TRUE
Potri.001G149300	-0.0031	1	FALSE
Potri.001G149400	-0.61	0.031	TRUE
Potri.001G149500	1.2	0.7	FALSE
Potri.001G149600	0.096	0.33	FALSE
Potri.001G149700	-0.17	0.69	FALSE
Potri.001G149800	-0.21	0.11	FALSE
Potri.001G149900	-0.15	0.02	TRUE
Potri.001G150000	-0.94	0.82	FALSE
Potri.001G150100	NA	NA	NA
Potri.001G150200	-0.74	3.1e-06	TRUE
Potri.001G150300	0.15	0.31	FALSE
Potri.001G150400	-0.25	0.036	TRUE
Potri.001G150500	-0.055	0.77	FALSE
Potri.001G150600	-0.058	0.73	FALSE
Potri.001G150700	0.12	0.9	FALSE
Potri.001G150800	-0.0098	1	FALSE
Potri.001G150900	0.26	0.05	FALSE
Potri.001G151000	NA	NA	NA
Potri.001G151100	-0.57	0.45	FALSE
Potri.001G151200	0.66	0.73	FALSE
Potri.001G151300	0.24	0.069	FALSE
Potri.001G151400	0.3	0.58	FALSE
Potri.001G151500	-0.66	0.74	FALSE
Potri.001G151600	0.35	0.46	FALSE
Potri.001G151700	-0.28	0.0036	TRUE
Potri.001G151800	-0.18	0.4	FALSE
Potri.001G151900	0.25	0.32	FALSE
Potri.001G152000	0.14	0.099	FALSE
Potri.001G152100	-0.4	3.6e-06	TRUE
Potri.001G152200	0.099	0.34	FALSE
Potri.001G152300	-0.91	0.026	TRUE
Potri.001G152400	NA	NA	NA
Potri.001G152500	-0.64	0.074	FALSE
Potri.001G152600	-0.41	0.2	FALSE
Potri.001G152700	-0.3	0.058	FALSE
Potri.001G152800	-0.47	6.5e-06	TRUE
Potri.001G152900	0.3	0.93	FALSE
Potri.001G153000	0.31	0.00064	TRUE
Potri.001G153100	1.6	0.087	FALSE
Potri.001G153200	-1.2	0.78	FALSE
Potri.001G153300	-0.11	0.6	FALSE
Potri.001G153400	0.51	0.00059	TRUE
Potri.001G153500	NA	NA	NA
Potri.001G153600	NA	NA	NA
Potri.001G153700	-4	NA	NA
Potri.001G153800	-1	0.05	FALSE
Potri.001G153900	0.33	0.36	FALSE
Potri.001G154000	0.38	0.57	FALSE
Potri.001G154100	-0.86	0.13	FALSE
Potri.001G154200	0.72	0.39	FALSE
Potri.001G154300	0.61	0.0041	TRUE
Potri.001G154400	0.065	0.67	FALSE
Potri.001G154500	0.45	0.059	FALSE
Potri.001G154600	-0.63	2.6e-06	TRUE
Potri.001G154700	0.11	0.34	FALSE
Potri.001G154800	0.23	0.81	FALSE
Potri.001G154900	0.085	0.67	FALSE
Potri.001G155000	0.15	0.57	FALSE
Potri.001G155100	0.17	0.26	FALSE
Potri.001G155200	0.12	0.33	FALSE
Potri.001G155300	-0.3	0.054	FALSE
Potri.001G155400	0	NA	NA
Potri.001G155500	0.76	0.0035	TRUE
Potri.001G155600	-3	0.25	FALSE
Potri.001G155700	0.95	0.0051	TRUE
Potri.001G155800	-0.49	1.4e-05	TRUE
Potri.001G155900	-0.35	0.00082	TRUE
Potri.001G156000	-0.97	1e-13	TRUE
Potri.001G156100	-0.078	0.73	FALSE
Potri.001G156200	-0.41	0.28	FALSE
Potri.001G156300	0.33	0.55	FALSE
Potri.001G156400	-0.35	0.51	FALSE
Potri.001G156500	-0.13	0.45	FALSE
Potri.001G156600	0.27	0.28	FALSE
Potri.001G156700	-1.5	0.0031	TRUE
Potri.001G156800	NA	NA	NA
Potri.001G156900	0	1	FALSE
Potri.001G157000	-0.44	0.3	FALSE
Potri.001G157100	0.15	0.93	FALSE
Potri.001G157200	0.092	0.96	FALSE
Potri.001G157300	0.014	0.95	FALSE
Potri.001G157400	0.32	0.011	TRUE
Potri.001G157500	-0.19	0.6	FALSE
Potri.001G157600	-0.79	0.00019	TRUE
Potri.001G157700	0.66	0.0013	TRUE
Potri.001G157800	-0.026	0.87	FALSE
Potri.001G157900	-0.054	0.71	FALSE
Potri.001G158000	1	1.9e-13	TRUE
Potri.001G158100	0.63	0.12	FALSE
Potri.001G158200	0.25	0.0031	TRUE
Potri.001G158300	-2.2	NA	NA
Potri.001G158400	-0.68	0.48	FALSE
Potri.001G158500	-2.6	0.73	FALSE
Potri.001G158600	-0.073	0.93	FALSE
Potri.001G158700	0.05	0.93	FALSE
Potri.001G158800	-0.6	0.13	FALSE
Potri.001G158900	0.00071	1	FALSE
Potri.001G159000	-0.18	0.17	FALSE
Potri.001G159100	3.9	NA	NA
Potri.001G159200	0.65	0.61	FALSE
Potri.001G159300	0.38	0.58	FALSE
Potri.001G159400	0.23	0.086	FALSE
Potri.001G159500	NA	NA	NA
Potri.001G159600	0.45	0.0018	TRUE
Potri.001G159700	0.35	0.00049	TRUE
Potri.001G159800	5.3	0.2	FALSE
Potri.001G159900	0.048	0.9	FALSE
Potri.001G160000	-6	0.15	FALSE
Potri.001G160100	-1.4	6.2e-15	TRUE
Potri.001G160200	-2.4	0.00054	TRUE
Potri.001G160300	0.3	0.0013	TRUE
Potri.001G160400	0.76	0.28	FALSE
Potri.001G160500	0.014	0.94	FALSE
Potri.001G160600	0.14	0.48	FALSE
Potri.001G160700	-0.071	0.49	FALSE
Potri.001G160800	0.37	0.042	TRUE
Potri.001G160900	0	1	FALSE
Potri.001G161000	0.17	0.3	FALSE
Potri.001G161100	0.16	0.22	FALSE
Potri.001G161200	0.82	0.00012	TRUE
Potri.001G161300	NA	NA	NA
Potri.001G161400	0.4	0.16	FALSE
Potri.001G161500	0.74	0.24	FALSE
Potri.001G161600	-0.22	0.1	FALSE
Potri.001G161700	-0.083	0.44	FALSE
Potri.001G161800	-0.37	0.009	TRUE
Potri.001G161900	-0.0081	0.97	FALSE
Potri.001G162000	-2.2	4.6e-12	TRUE
Potri.001G162100	0.64	0.12	FALSE
Potri.001G162200	-0.33	0.00043	TRUE
Potri.001G162300	-0.16	0.86	FALSE
Potri.001G162400	0.51	0.0073	TRUE
Potri.001G162500	0.28	0.27	FALSE
Potri.001G162600	0.16	0.64	FALSE
Potri.001G162700	-0.21	0.73	FALSE
Potri.001G162800	-0.36	0.4	FALSE
Potri.001G162900	-0.13	0.2	FALSE
Potri.001G163000	1.2	0.00024	TRUE
Potri.001G163100	0.75	1.2e-06	TRUE
Potri.001G163200	-0.32	0.028	TRUE
Potri.001G163300	-0.68	6.3e-07	TRUE
Potri.001G163400	1.3	0.019	TRUE
Potri.001G163500	-3.5	0.25	FALSE
Potri.001G163600	0.98	0.0011	TRUE
Potri.001G163700	-0.28	0.13	FALSE
Potri.001G163800	0.088	0.87	FALSE
Potri.001G163900	0.81	2.8e-09	TRUE
Potri.001G164000	0.033	0.85	FALSE
Potri.001G164100	0.42	8.2e-05	TRUE
Potri.001G164200	-2.5	NA	NA
Potri.001G164300	0.19	0.62	FALSE
Potri.001G164400	-3.4	0.45	FALSE
Potri.001G164500	2.5	0.6	FALSE
Potri.001G164600	0	NA	NA
Potri.001G164700	0.5	0.04	TRUE
Potri.001G164800	0.39	0.25	FALSE
Potri.001G164900	0.47	0.016	TRUE
Potri.001G165000	-2.3	0.0097	TRUE
Potri.001G165100	-0.045	0.96	FALSE
Potri.001G165200	-2	0.16	FALSE
Potri.001G165300	-0.67	0.8	FALSE
Potri.001G165400	0.77	0.6	FALSE
Potri.001G165500	-0.21	0.95	FALSE
Potri.001G165600	-0.27	0.00079	TRUE
Potri.001G165700	NA	NA	NA
Potri.001G165800	0.0047	0.99	FALSE
Potri.001G165900	0.5	3e-09	TRUE
Potri.001G166000	0.54	0.00058	TRUE
Potri.001G166100	-0.089	0.18	FALSE
Potri.001G166200	-0.9	0.066	FALSE
Potri.001G166300	0.23	0.94	FALSE
Potri.001G166400	0.23	0.0032	TRUE
Potri.001G166500	0.65	0.0005	TRUE
Potri.001G166600	-0.073	0.62	FALSE
Potri.001G166700	-0.42	0.67	FALSE
Potri.001G166800	0.67	0.004	TRUE
Potri.001G166900	0.62	0.0022	TRUE
Potri.001G167000	0	NA	NA
Potri.001G167100	-1.4	1.2e-07	TRUE
Potri.001G167200	-0.33	0.035	TRUE
Potri.001G167300	0.57	0.0067	TRUE
Potri.001G167400	-0.098	0.69	FALSE
Potri.001G167500	NA	NA	NA
Potri.001G167600	-0.4	0.44	FALSE
Potri.001G167700	-0.74	0.066	FALSE
Potri.001G167800	1.3	0.00024	TRUE
Potri.001G167900	0.64	0.14	FALSE
Potri.001G168000	-4.1	5.9e-15	TRUE
Potri.001G168100	-0.57	0.00045	TRUE
Potri.001G168200	-0.63	6.5e-05	TRUE
Potri.001G168300	-0.26	0.0048	TRUE
Potri.001G168400	-0.5	0.3	FALSE
Potri.001G168500	-4.2	NA	NA
Potri.001G168600	-0.13	0.59	FALSE
Potri.001G168700	0.28	0.051	FALSE
Potri.001G168800	1.1	0.00021	TRUE
Potri.001G168900	0.76	0.11	FALSE
Potri.001G169000	-1.9	0.15	FALSE
Potri.001G169100	-0.71	0.7	FALSE
Potri.001G169200	-0.55	0.027	TRUE
Potri.001G169300	2.4	NA	NA
Potri.001G169400	NA	NA	NA
Potri.001G169500	0.7	0.056	FALSE
Potri.001G169600	0.39	0.3	FALSE
Potri.001G169700	-0.73	3.2e-08	TRUE
Potri.001G169800	NA	NA	NA
Potri.001G169900	-0.51	0.0003	TRUE
Potri.001G170000	-0.16	0.8	FALSE
Potri.001G170100	-0.013	0.98	FALSE
Potri.001G170200	-0.074	0.58	FALSE
Potri.001G170300	0.11	0.22	FALSE
Potri.001G170400	0.048	0.7	FALSE
Potri.001G170500	0.083	0.78	FALSE
Potri.001G170600	NA	NA	NA
Potri.001G170700	0.03	0.79	FALSE
Potri.001G170800	0.096	0.77	FALSE
Potri.001G170900	0.82	NA	NA
Potri.001G171000	0.39	0.0001	TRUE
Potri.001G171100	-0.25	0.00066	TRUE
Potri.001G171200	0.21	0.023	TRUE
Potri.001G171300	-0.41	0.19	FALSE
Potri.001G171400	0.84	0.11	FALSE
Potri.001G171500	1.1	0.55	FALSE
Potri.001G171600	0.53	0.23	FALSE
Potri.001G171700	-0.94	0.52	FALSE
Potri.001G171800	0.33	0.0038	TRUE
Potri.001G171900	0.7	1.5e-05	TRUE
Potri.001G172000	0	NA	NA
Potri.001G172100	-0.69	0.0014	TRUE
Potri.001G172200	NA	NA	NA
Potri.001G172300	0.82	0.019	TRUE
Potri.001G172400	0.42	0.0044	TRUE
Potri.001G172500	0.41	0.041	TRUE
Potri.001G172600	0.13	0.47	FALSE
Potri.001G172700	0.84	0.011	TRUE
Potri.001G172800	0.29	0.00043	TRUE
Potri.001G172900	-7.6	0.0037	TRUE
Potri.001G173000	-7.2	5.2e-25	TRUE
Potri.001G173100	0.15	0.61	FALSE
Potri.001G173200	-8.4	3.2e-08	TRUE
Potri.001G173300	0.03	0.95	FALSE
Potri.001G173400	-0.38	0.64	FALSE
Potri.001G173500	0.34	0.027	TRUE
Potri.001G173600	-0.58	0.86	FALSE
Potri.001G173700	1.9	1.9e-13	TRUE
Potri.001G173800	-0.025	0.79	FALSE
Potri.001G173900	-0.37	0.019	TRUE
Potri.001G174000	-0.31	0.03	TRUE
Potri.001G174100	0.3	0.027	TRUE
Potri.001G174200	2.2	0.59	FALSE
Potri.001G174300	0.65	0.025	TRUE
Potri.001G174400	0.84	0.07	FALSE
Potri.001G174500	-2.1	0.048	TRUE
Potri.001G174600	0.00066	1	FALSE
Potri.001G174700	-0.0069	1	FALSE
Potri.001G174800	NA	NA	NA
Potri.001G174900	0.37	3.2e-05	TRUE
Potri.001G175000	0.48	6.1e-05	TRUE
Potri.001G175100	NA	NA	NA
Potri.001G175200	-0.45	0.1	FALSE
Potri.001G175300	NA	NA	NA
Potri.001G175400	0.56	0.18	FALSE
Potri.001G175500	0.4	0.15	FALSE
Potri.001G175600	0.67	4.1e-07	TRUE
Potri.001G175700	-0.76	0.49	FALSE
Potri.001G175800	-0.3	0.51	FALSE
Potri.001G175900	0.71	0.21	FALSE
Potri.001G176000	-0.68	0.49	FALSE
Potri.001G176100	0.18	0.84	FALSE
Potri.001G176200	-0.34	0.91	FALSE
Potri.001G176300	NA	NA	NA
Potri.001G176400	NA	NA	NA
Potri.001G176500	-0.53	0.26	FALSE
Potri.001G176600	1.2	0.0051	TRUE
Potri.001G176700	NA	NA	NA
Potri.001G176800	-2.5	NA	NA
Potri.001G176900	0.08	0.63	FALSE
Potri.001G177000	-0.24	0.0055	TRUE
Potri.001G177100	-0.013	0.99	FALSE
Potri.001G177200	0.21	0.28	FALSE
Potri.001G177300	0.075	0.76	FALSE
Potri.001G177400	0.059	0.84	FALSE
Potri.001G177500	-0.24	0.58	FALSE
Potri.001G177600	2.4	0.02	TRUE
Potri.001G177700	0.55	0.33	FALSE
Potri.001G177800	0.02	1	FALSE
Potri.001G177900	0.5	0.65	FALSE
Potri.001G178000	-0.11	0.38	FALSE
Potri.001G178100	0.15	0.49	FALSE
Potri.001G178200	-0.043	0.83	FALSE
Potri.001G178300	-0.3	0.29	FALSE
Potri.001G178400	-0.68	3.7e-05	TRUE
Potri.001G178500	-0.68	0.52	FALSE
Potri.001G178600	0.33	0.78	FALSE
Potri.001G178700	NA	NA	NA
Potri.001G178800	0.04	0.79	FALSE
Potri.001G178900	-0.086	0.43	FALSE
Potri.001G179000	0.54	8.5e-06	TRUE
Potri.001G179100	-0.0014	1	FALSE
Potri.001G179200	0.02	0.86	FALSE
Potri.001G179300	0.063	0.98	FALSE
Potri.001G179400	1.3	2.6e-12	TRUE
Potri.001G179500	-0.021	0.89	FALSE
Potri.001G179600	0.72	3.4e-07	TRUE
Potri.001G179700	0.37	0.012	TRUE
Potri.001G179800	0.18	0.068	FALSE
Potri.001G179900	NA	NA	NA
Potri.001G180000	0.28	0.048	TRUE
Potri.001G180100	-0.22	3.3e-05	TRUE
Potri.001G180200	0.33	0.046	TRUE
Potri.001G180300	0.17	0.84	FALSE
Potri.001G180400	0.45	0.42	FALSE
Potri.001G180500	1.5	0.00049	TRUE
Potri.001G180600	0.6	0.18	FALSE
Potri.001G180700	NA	NA	NA
Potri.001G180800	NA	NA	NA
Potri.001G180900	NA	NA	NA
Potri.001G181000	0.94	0.02	TRUE
Potri.001G181100	-0.92	2e-19	TRUE
Potri.001G181200	-0.17	0.43	FALSE
Potri.001G181300	-0.64	0.012	TRUE
Potri.001G181400	NA	NA	NA
Potri.001G181500	-0.77	0.68	FALSE
Potri.001G181600	-0.24	0.93	FALSE
Potri.001G181700	0.0094	0.98	FALSE
Potri.001G181800	-0.049	0.84	FALSE
Potri.001G181900	-0.048	0.96	FALSE
Potri.001G182000	0.35	0.011	TRUE
Potri.001G182100	-0.86	5.3e-08	TRUE
Potri.001G182200	NA	NA	NA
Potri.001G182300	0.24	0.15	FALSE
Potri.001G182400	0.92	0.26	FALSE
Potri.001G182500	0.17	0.63	FALSE
Potri.001G182600	0.53	0.13	FALSE
Potri.001G182700	1.2	3e-15	TRUE
Potri.001G182800	NA	NA	NA
Potri.001G182900	-0.57	0.021	TRUE
Potri.001G183000	0.36	0.06	FALSE
Potri.001G183100	-0.058	0.64	FALSE
Potri.001G183200	-0.0059	0.99	FALSE
Potri.001G183300	-2.6	0.65	FALSE
Potri.001G183400	0.28	0.73	FALSE
Potri.001G183500	-0.053	0.71	FALSE
Potri.001G183600	0.58	0.0093	TRUE
Potri.001G183700	0.1	0.61	FALSE
Potri.001G183800	-0.99	0.044	TRUE
Potri.001G183900	0	NA	NA
Potri.001G184000	0.21	0.13	FALSE
Potri.001G184100	0.3	0.086	FALSE
Potri.001G184200	-0.59	0.00022	TRUE
Potri.001G184300	1.6	0.0062	TRUE
Potri.001G184400	-0.11	0.82	FALSE
Potri.001G184500	NA	NA	NA
Potri.001G184600	NA	NA	NA
Potri.001G184700	0.17	0.2	FALSE
Potri.001G184800	0.42	0.29	FALSE
Potri.001G184900	NA	NA	NA
Potri.001G185000	0.21	0.18	FALSE
Potri.001G185100	0.29	0.016	TRUE
Potri.001G185200	-1.4	0.0052	TRUE
Potri.001G185300	0.22	0.28	FALSE
Potri.001G185400	-0.13	0.94	FALSE
Potri.001G185500	-0.12	0.53	FALSE
Potri.001G185600	0.019	0.93	FALSE
Potri.001G185700	0.75	0.00043	TRUE
Potri.001G185800	NA	NA	NA
Potri.001G185900	0.86	5.1e-10	TRUE
Potri.001G186000	0.038	0.8	FALSE
Potri.001G186100	0.86	2.9e-08	TRUE
Potri.001G186200	0.35	0.12	FALSE
Potri.001G186300	NA	NA	NA
Potri.001G186400	-0.97	0.41	FALSE
Potri.001G186500	0.62	0.0027	TRUE
Potri.001G186600	0.25	0.16	FALSE
Potri.001G186700	0.068	0.75	FALSE
Potri.001G186800	-0.13	0.85	FALSE
Potri.001G186900	0.11	0.26	FALSE
Potri.001G187000	-0.24	0.0048	TRUE
Potri.001G187100	0.45	0.0023	TRUE
Potri.001G187200	0.32	0.014	TRUE
Potri.001G187300	-0.86	2.1e-06	TRUE
Potri.001G187400	-4.5	0.12	FALSE
Potri.001G187500	1.3	1.5e-08	TRUE
Potri.001G187600	1.1	0.081	FALSE
Potri.001G187700	-1.2	0.25	FALSE
Potri.001G187800	-1.1	0.64	FALSE
Potri.001G187900	NA	NA	NA
Potri.001G188000	0.33	0.0035	TRUE
Potri.001G188100	NA	NA	NA
Potri.001G188200	-0.94	NA	NA
Potri.001G188300	-0.17	0.046	TRUE
Potri.001G188400	-1.3	0.43	FALSE
Potri.001G188500	-0.82	0.077	FALSE
Potri.001G188600	NA	NA	NA
Potri.001G188700	0.56	0.79	FALSE
Potri.001G188800	0.24	0.048	TRUE
Potri.001G188900	-0.21	0.55	FALSE
Potri.001G189000	NA	NA	NA
Potri.001G189100	-0.091	0.27	FALSE
Potri.001G189200	0.34	0.0038	TRUE
Potri.001G189300	-0.12	NA	NA
Potri.001G189400	0.44	0.13	FALSE
Potri.001G189500	-0.46	0.028	TRUE
Potri.001G189600	NA	NA	NA
Potri.001G189700	-0.95	1e-06	TRUE
Potri.001G189800	-0.48	0.00073	TRUE
Potri.001G189900	3.9	7.8e-21	TRUE
Potri.001G190000	0.13	0.23	FALSE
Potri.001G190100	0.51	0.0022	TRUE
Potri.001G190200	0.65	4e-06	TRUE
Potri.001G190300	-0.046	0.89	FALSE
Potri.001G190400	-0.045	0.86	FALSE
Potri.001G190500	0.18	0.43	FALSE
Potri.001G190600	-0.72	0.43	FALSE
Potri.001G190700	-1.5	8.1e-05	TRUE
Potri.001G190800	-0.78	0.0023	TRUE
Potri.001G190900	3.4	NA	NA
Potri.001G191000	1.5	0.00024	TRUE
Potri.001G191100	-0.015	0.92	FALSE
Potri.001G191200	0.47	3.3e-06	TRUE
Potri.001G191300	-0.41	0.037	TRUE
Potri.001G191400	-1.8	0.12	FALSE
Potri.001G191500	-0.35	0.72	FALSE
Potri.001G191600	0	NA	NA
Potri.001G191700	NA	NA	NA
Potri.001G191800	-0.23	0.73	FALSE
Potri.001G191900	0.46	0.51	FALSE
Potri.001G192000	-0.17	0.39	FALSE
Potri.001G192100	-1.1	0.41	FALSE
Potri.001G192200	-0.25	0.3	FALSE
Potri.001G192300	-1.1	0.25	FALSE
Potri.001G192400	-1.3	0.3	FALSE
Potri.001G192500	-0.28	0.029	TRUE
Potri.001G192600	-3.8	1.3e-08	TRUE
Potri.001G192700	-0.9	8.6e-14	TRUE
Potri.001G192800	-3.6	3.5e-25	TRUE
Potri.001G192900	NA	NA	NA
Potri.001G193000	-0.6	1.8e-09	TRUE
Potri.001G193100	-0.43	1.1e-05	TRUE
Potri.001G193200	-1.6	0.00056	TRUE
Potri.001G193300	0.09	0.49	FALSE
Potri.001G193400	0.61	0.0064	TRUE
Potri.001G193500	0.65	2.1e-05	TRUE
Potri.001G193600	-2.3	0.37	FALSE
Potri.001G193700	0.1	0.21	FALSE
Potri.001G193800	NA	NA	NA
Potri.001G193900	0.09	0.43	FALSE
Potri.001G194000	-0.14	0.46	FALSE
Potri.001G194100	-1.9	1.4e-09	TRUE
Potri.001G194200	NA	NA	NA
Potri.001G194300	NA	NA	NA
Potri.001G194400	0.088	0.72	FALSE
Potri.001G194500	-0.14	0.89	FALSE
Potri.001G194600	NA	NA	NA
Potri.001G194700	NA	NA	NA
Potri.001G194800	-1.4	0.58	FALSE
Potri.001G194900	NA	NA	NA
Potri.001G195000	-1.6	0.12	FALSE
Potri.001G195100	NA	NA	NA
Potri.001G195200	NA	NA	NA
Potri.001G195300	0.31	0.055	FALSE
Potri.001G195400	NA	NA	NA
Potri.001G195500	NA	NA	NA
Potri.001G195600	NA	NA	NA
Potri.001G195700	NA	NA	NA
Potri.001G195800	NA	NA	NA
Potri.001G195900	-0.12	0.64	FALSE
Potri.001G196000	NA	NA	NA
Potri.001G196100	-0.89	0.65	FALSE
Potri.001G196200	NA	NA	NA
Potri.001G196300	0	NA	NA
Potri.001G196400	NA	NA	NA
Potri.001G196500	-0.55	2.3e-09	TRUE
Potri.001G196600	0.0054	0.98	FALSE
Potri.001G196700	-0.13	0.39	FALSE
Potri.001G196800	0.015	0.87	FALSE
Potri.001G196900	NA	NA	NA
Potri.001G197000	1.3	2.2e-05	TRUE
Potri.001G197100	3.1	1.5e-05	TRUE
Potri.001G197200	-0.038	0.81	FALSE
Potri.001G197300	-0.0053	0.98	FALSE
Potri.001G197400	-0.42	3.7e-18	TRUE
Potri.001G197500	0.04	0.82	FALSE
Potri.001G197600	-0.18	0.0016	TRUE
Potri.001G197700	-0.94	1.5e-06	TRUE
Potri.001G197800	NA	NA	NA
Potri.001G197900	0.016	0.86	FALSE
Potri.001G198000	0.066	0.68	FALSE
Potri.001G198100	-0.57	8e-07	TRUE
Potri.001G198200	NA	NA	NA
Potri.001G198300	-3.1	0.24	FALSE
Potri.001G198400	-0.29	0.8	FALSE
Potri.001G198500	-0.55	0.017	TRUE
Potri.001G198600	-0.21	0.13	FALSE
Potri.001G198700	0.1	0.27	FALSE
Potri.001G198800	2.2	0.68	FALSE
Potri.001G198900	-0.45	0.12	FALSE
Potri.001G199000	0.72	0.83	FALSE
Potri.001G199100	0.099	0.78	FALSE
Potri.001G199200	0.045	0.78	FALSE
Potri.001G199300	0	NA	NA
Potri.001G199400	NA	NA	NA
Potri.001G199500	0.08	0.43	FALSE
Potri.001G199600	0.19	0.018	TRUE
Potri.001G199700	NA	NA	NA
Potri.001G199800	NA	NA	NA
Potri.001G199900	NA	NA	NA
[truncated: 39,336 more rows]

## Sheet: Sig_DEG_leaf
Gene_ID	Log2FC	P-adj	Sig
Potri.001G223900	-12	6.3e-07	TRUE
Potri.004G148900	-12	8.1e-09	TRUE
Potri.008G037600	-12	9.1e-07	TRUE
Potri.011G159800	-12	1.4e-06	TRUE
Potri.011G159900	-12	1.6e-06	TRUE
Potri.011G160000	-12	2.8e-06	TRUE
Potri.T140100	-12	2.6e-07	TRUE
Potri.001G223700	-11	1.6e-10	TRUE
Potri.001G224000	-11	1.4e-11	TRUE
Potri.001G327700	-11	0.00011	TRUE
Potri.004G007000	-11	2.2e-06	TRUE
Potri.004G148600	-11	1.5e-11	TRUE
Potri.006G137600	-11	7.3e-12	TRUE
Potri.007G036900	-11	9e-07	TRUE
Potri.007G037000	-11	2.1e-07	TRUE
Potri.011G159600	-11	2.2e-11	TRUE
Potri.015G085800	-11	0.0039	TRUE
Potri.002G219600	-10	9e-05	TRUE
Potri.008G118400	-10	9.9e-06	TRUE
Potri.012G137200	-10	2.4e-08	TRUE
Potri.001G222800	-9.8	3.3e-20	TRUE
Potri.004G007100	-9.8	5.4e-05	TRUE
Potri.001G223800	-9.7	8.8e-05	TRUE
Potri.001G440400	-9.6	9.5e-05	TRUE
Potri.014G013000	-9.6	1.6e-23	TRUE
Potri.001G376200	-9.5	0.0001	TRUE
Potri.007G049400	-9.5	1.6e-16	TRUE
Potri.011G161100	-9.5	4e-14	TRUE
Potri.019G075500	-9.4	6.4e-05	TRUE
Potri.011G168400	-9.3	5.4e-08	TRUE
Potri.001G173000	-9.1	0.00012	TRUE
Potri.001G223600	-9.1	2.1e-10	TRUE
Potri.007G037200	-9.1	5.4e-12	TRUE
Potri.008G149200	-9.1	1.4e-29	TRUE
Potri.T095600	-9	0.00055	TRUE
Potri.015G143900	-8.9	0.00028	TRUE
Potri.011G030600	-8.8	0.00057	TRUE
Potri.T092500	-8.8	0.0054	TRUE
Potri.001G223500	-8.7	2.8e-12	TRUE
Potri.007G037100	-8.7	1.1e-08	TRUE
Potri.011G159200	-8.7	0.00093	TRUE
Potri.006G044800	-8.6	0.00096	TRUE
Potri.007G109200	-8.6	2.6e-30	TRUE
Potri.009G118700	-8.5	8.2e-07	TRUE
Potri.T083700	-8.4	0.00058	TRUE
Potri.001G459100	-8.3	0.0016	TRUE
Potri.015G046600	-8.3	0.0011	TRUE
Potri.019G088600	-8.1	1.1e-16	TRUE
Potri.T095700	-8.1	2.4e-05	TRUE
Potri.001G437900	-8	0.0017	TRUE
Potri.004G007200	-8	4.8e-05	TRUE
Potri.009G103900	-8	0.006	TRUE
Potri.011G141000	-8	0.019	TRUE
Potri.011G160300	-8	0.0043	TRUE
Potri.011G160900	-8	4.2e-14	TRUE
Potri.001G008900	-7.9	6.4e-20	TRUE
Potri.004G094900	-7.9	0.0018	TRUE
Potri.017G134000	-7.9	1.7e-09	TRUE
Potri.003G220200	-7.8	9.1e-06	TRUE
Potri.005G000800	-7.8	4.8e-06	TRUE
Potri.010G072400	-7.8	6e-09	TRUE
Potri.019G088700	-7.8	3.1e-10	TRUE
Potri.T004500	-7.8	0.00027	TRUE
Potri.001G205100	-7.7	2e-05	TRUE
Potri.002G191900	-7.6	0.0015	TRUE
Potri.008G031000	-7.6	0.0029	TRUE
Potri.015G133900	-7.6	1.2e-28	TRUE
Potri.T095900	-7.6	1.1e-10	TRUE
Potri.001G381600	-7.5	0.0033	TRUE
Potri.005G133900	-7.5	1e-11	TRUE
Potri.006G018200	-7.5	9.6e-05	TRUE
Potri.007G074400	-7.5	5.7e-15	TRUE
Potri.016G102100	-7.5	1.8e-32	TRUE
Potri.019G088900	-7.5	1.9e-12	TRUE
Potri.006G122400	-7.4	1.7e-23	TRUE
Potri.009G147100	-7.4	4e-09	TRUE
Potri.010G247700	-7.4	0.0017	TRUE
Potri.012G142000	-7.4	4.5e-13	TRUE
Potri.013G157100	-7.4	0.017	TRUE
Potri.001G080600	-7.3	0.0039	TRUE
Potri.001G337800	-7.3	2.3e-05	TRUE
Potri.005G200500	-7.3	7e-13	TRUE
Potri.006G092200	-7.3	0.0024	TRUE
Potri.009G140400	-7.3	4.3e-12	TRUE
Potri.011G134100	-7.3	3e-05	TRUE
Potri.011G160500	-7.3	2.7e-07	TRUE
Potri.018G094100	-7.3	9.6e-16	TRUE
Potri.002G083700	-7.2	1.9e-11	TRUE
Potri.002G163700	-7.2	2.6e-22	TRUE
Potri.003G169500	-7.2	0.0037	TRUE
Potri.005G172500	-7.2	0.0037	TRUE
Potri.014G022200	-7.2	1.3e-08	TRUE
Potri.T155800	-7.2	2.8e-32	TRUE
Potri.001G083700	-7.1	4.1e-23	TRUE
Potri.006G094200	-7	0.014	TRUE
Potri.011G158100	-7	1.4e-09	TRUE
Potri.003G024100	-6.9	0.011	TRUE
Potri.004G073800	-6.9	0.015	TRUE
Potri.014G034500	-6.9	0.0043	TRUE
Potri.016G046400	-6.9	2.3e-33	TRUE
Potri.001G419400	-6.8	0.0042	TRUE
Potri.008G065700	-6.8	0.0088	TRUE
Potri.011G160200	-6.8	0.023	TRUE
Potri.013G045200	-6.8	2e-11	TRUE
Potri.013G074000	-6.8	0.0098	TRUE
Potri.018G103400	-6.8	0.0004	TRUE
Potri.T111200	-6.8	0.0062	TRUE
Potri.001G408700	-6.7	3.5e-05	TRUE
Potri.003G086500	-6.7	1.9e-07	TRUE
Potri.005G078800	-6.7	0.011	TRUE
Potri.006G089400	-6.7	8.1e-05	TRUE
Potri.008G019600	-6.7	1e-08	TRUE
Potri.019G088800	-6.7	2.3e-15	TRUE
Potri.002G083800	-6.6	5.7e-14	TRUE
Potri.005G006800	-6.6	7e-40	TRUE
Potri.005G233300	-6.6	1.2e-23	TRUE
Potri.006G008100	-6.6	6.8e-09	TRUE
Potri.006G091100	-6.6	0.017	TRUE
Potri.013G101100	-6.6	0.00011	TRUE
Potri.014G080100	-6.6	1.1e-06	TRUE
Potri.005G200600	-6.5	6.2e-14	TRUE
Potri.013G154400	-6.5	9e-05	TRUE
Potri.T162700	-6.5	0.0074	TRUE
Potri.001G232000	-6.4	0.037	TRUE
Potri.001G389100	-6.4	0.009	TRUE
Potri.002G152600	-6.4	4.6e-20	TRUE
Potri.006G207200	-6.4	0.011	TRUE
Potri.007G118500	-6.4	3e-07	TRUE
Potri.009G102300	-6.4	0.027	TRUE
Potri.011G071100	-6.4	1.5e-13	TRUE
Potri.011G160700	-6.4	0.03	TRUE
Potri.015G067700	-6.4	0.013	TRUE
Potri.003G145800	-6.3	0.016	TRUE
Potri.004G026600	-6.3	4.4e-07	TRUE
Potri.006G038300	-6.3	2.6e-20	TRUE
Potri.010G212400	-6.3	2.5e-05	TRUE
Potri.001G220400	-6.2	0.012	TRUE
Potri.001G266500	-6.2	4.4e-09	TRUE
Potri.002G115900	-6.2	0.01	TRUE
Potri.003G195000	-6.2	0.014	TRUE
Potri.005G095400	-6.2	1.3e-12	TRUE
Potri.005G142900	-6.2	3.3e-07	TRUE
Potri.013G127600	-6.2	0.023	TRUE
Potri.013G148600	-6.2	1.2e-05	TRUE
Potri.014G022300	-6.2	0.00074	TRUE
Potri.T111300	-6.2	5.3e-29	TRUE
Potri.003G092100	-6.1	4.6e-18	TRUE
Potri.006G188400	-6.1	1.8e-08	TRUE
Potri.006G239400	-6.1	0.026	TRUE
Potri.008G163200	-6.1	8.6e-06	TRUE
Potri.010G072300	-6.1	3.2e-17	TRUE
Potri.012G141800	-6.1	1.7e-08	TRUE
Potri.015G106900	-6.1	4e-15	TRUE
Potri.016G037000	-6.1	2.2e-05	TRUE
Potri.T095800	-6.1	1.5e-08	TRUE
Potri.T101700	-6.1	0.016	TRUE
Potri.002G074200	-6	0.00073	TRUE
Potri.002G128500	-6	9.1e-19	TRUE
Potri.003G195900	-6	1.7e-19	TRUE
Potri.006G053600	-6	0.017	TRUE
Potri.006G067300	-6	4.6e-58	TRUE
Potri.007G013700	-6	4.9e-06	TRUE
Potri.008G010700	-6	0.017	TRUE
Potri.011G047300	-6	3.2e-15	TRUE
Potri.015G041000	-6	0.016	TRUE
Potri.017G011000	-6	0.017	TRUE
Potri.001G040800	-5.9	6.2e-13	TRUE
Potri.001G173200	-5.9	0.029	TRUE
Potri.001G263300	-5.9	0.023	TRUE
Potri.001G437700	-5.9	0.0027	TRUE
Potri.003G213700	-5.9	2.4e-20	TRUE
Potri.007G048400	-5.9	0.03	TRUE
Potri.010G029600	-5.9	0.043	TRUE
Potri.015G031900	-5.9	4.9e-11	TRUE
Potri.018G135200	-5.9	0.0035	TRUE
Potri.001G045600	-5.8	0.00073	TRUE
Potri.001G151500	-5.8	7.6e-05	TRUE
Potri.001G294800	-5.8	4.4e-20	TRUE
Potri.002G231600	-5.8	2.3e-07	TRUE
Potri.003G121400	-5.8	6e-23	TRUE
Potri.004G092800	-5.8	2.5e-25	TRUE
Potri.007G118600	-5.8	4e-09	TRUE
Potri.011G125900	-5.8	1.3e-06	TRUE
Potri.017G114900	-5.8	0.023	TRUE
Potri.002G049500	-5.7	2e-18	TRUE
Potri.003G108100	-5.7	0.027	TRUE
Potri.006G038100	-5.7	0.00082	TRUE
Potri.006G244200	-5.7	4.9e-08	TRUE
Potri.009G100500	-5.7	0.024	TRUE
Potri.011G126900	-5.7	3e-13	TRUE
Potri.015G018800	-5.7	4e-28	TRUE
Potri.018G130000	-5.7	0.025	TRUE
Potri.004G151400	-5.6	0.026	TRUE
Potri.006G022600	-5.6	1e-14	TRUE
Potri.007G006200	-5.6	2.2e-07	TRUE
Potri.007G111700	-5.6	0.0012	TRUE
Potri.008G159100	-5.6	8.3e-32	TRUE
Potri.008G212100	-5.6	2.6e-08	TRUE
Potri.009G034000	-5.6	8.4e-13	TRUE
Potri.010G072600	-5.6	1.2e-09	TRUE
Potri.010G103100	-5.6	8.3e-19	TRUE
Potri.011G070500	-5.6	2.8e-24	TRUE
Potri.012G117000	-5.6	1.5e-06	TRUE
Potri.013G011700	-5.6	1.8e-05	TRUE
Potri.014G069900	-5.6	0.026	TRUE
Potri.018G013000	-5.6	0.034	TRUE
Potri.001G041000	-5.5	5e-06	TRUE
Potri.003G216600	-5.5	2.7e-15	TRUE
Potri.006G105900	-5.5	1.1e-14	TRUE
Potri.012G001000	-5.5	3.7e-18	TRUE
Potri.017G124400	-5.5	0.03	TRUE
Potri.018G129000	-5.5	0.00011	TRUE
Potri.001G153800	-5.4	4.4e-22	TRUE
Potri.008G137700	-5.4	4.5e-30	TRUE
Potri.008G179300	-5.4	1.4e-17	TRUE
Potri.010G075100	-5.4	1.3e-11	TRUE
Potri.010G218400	-5.4	2.7e-05	TRUE
Potri.011G003100	-5.4	0.032	TRUE
Potri.011G059200	-5.4	0.003	TRUE
Potri.011G167600	-5.4	0.041	TRUE
Potri.017G033100	-5.4	0.043	TRUE
Potri.019G017500	-5.4	1.1e-05	TRUE
Potri.019G069200	-5.4	0.0069	TRUE
Potri.001G309900	-5.3	2e-06	TRUE
Potri.001G328000	-5.3	5.9e-17	TRUE
Potri.002G091500	-5.3	1.5e-07	TRUE
Potri.002G165100	-5.3	8.4e-05	TRUE
Potri.005G022000	-5.3	0.012	TRUE
Potri.008G055600	-5.3	9.9e-06	TRUE
Potri.008G128700	-5.3	1.7e-06	TRUE
Potri.009G063300	-5.3	1.4e-30	TRUE
Potri.010G143500	-5.3	0.036	TRUE
Potri.011G079300	-5.3	0.034	TRUE
Potri.013G160400	-5.3	0.0049	TRUE
Potri.014G100800	-5.3	1.6e-26	TRUE
Potri.016G035100	-5.3	1.3e-07	TRUE
Potri.018G025500	-5.3	2e-11	TRUE
Potri.001G046400	-5.2	3.5e-23	TRUE
Potri.001G268400	-5.2	9.3e-10	TRUE
Potri.001G316900	-5.2	1.7e-14	TRUE
Potri.001G380000	-5.2	3.3e-18	TRUE
Potri.002G098400	-5.2	1.8e-22	TRUE
Potri.002G161200	-5.2	0.0068	TRUE
Potri.003G062400	-5.2	7.3e-40	TRUE
Potri.005G205100	-5.2	0.00029	TRUE
Potri.006G207100	-5.2	4e-05	TRUE
Potri.006G274900	-5.2	0.019	TRUE
Potri.009G016100	-5.2	1e-08	TRUE
Potri.009G104000	-5.2	3.6e-23	TRUE
Potri.014G012900	-5.2	1.6e-18	TRUE
Potri.014G095600	-5.2	0.037	TRUE
Potri.014G113400	-5.2	6.9e-06	TRUE
Potri.019G036200	-5.2	0.036	TRUE
Potri.001G268500	-5.1	3.8e-31	TRUE
Potri.008G048300	-5.1	0.044	TRUE
Potri.008G127200	-5.1	6.7e-19	TRUE
Potri.008G155200	-5.1	1.3e-13	TRUE
Potri.009G024500	-5.1	0.00013	TRUE
Potri.010G055800	-5.1	0.039	TRUE
Potri.010G115100	-5.1	1.6e-23	TRUE
Potri.010G176600	-5.1	0.041	TRUE
Potri.010G209400	-5.1	8.8e-09	TRUE
Potri.011G135700	-5.1	3.9e-24	TRUE
Potri.013G037800	-5.1	0.049	TRUE
Potri.015G003200	-5.1	0.042	TRUE
Potri.015G060600	-5.1	4.9e-15	TRUE
Potri.015G099200	-5.1	4.1e-10	TRUE
Potri.015G111100	-5.1	0.0031	TRUE
Potri.017G134100	-5.1	3.7e-05	TRUE
Potri.018G071900	-5.1	0.044	TRUE
Potri.T079600	-5.1	0.046	TRUE
Potri.T115000	-5.1	7.5e-12	TRUE
Potri.T162600	-5.1	0.004	TRUE
Potri.001G008100	-5	0.0054	TRUE
Potri.001G099000	-5	6.3e-11	TRUE
Potri.002G039200	-5	0.0037	TRUE
Potri.002G056700	-5	1.3e-14	TRUE
Potri.002G113900	-5	0.00066	TRUE
Potri.003G077800	-5	1.3e-12	TRUE
Potri.005G246300	-5	2.5e-14	TRUE
Potri.006G147900	-5	1.8e-09	TRUE
Potri.010G036400	-5	0.048	TRUE
Potri.010G173300	-5	0.049	TRUE
Potri.011G081900	-5	0.0002	TRUE
Potri.012G117100	-5	1e-11	TRUE
Potri.014G044700	-5	0.0061	TRUE
Potri.019G088500	-5	4.8e-14	TRUE
Potri.T168000	-5	1.2e-05	TRUE
Potri.001G302500	-4.9	6.4e-12	TRUE
Potri.001G374600	-4.9	4.4e-05	TRUE
Potri.002G120900	-4.9	2.7e-05	TRUE
Potri.002G256800	-4.9	9.6e-08	TRUE
Potri.004G055900	-4.9	2.1e-07	TRUE
Potri.004G212000	-4.9	7.4e-27	TRUE
Potri.010G218500	-4.9	1.3e-11	TRUE
Potri.011G029700	-4.9	0.0072	TRUE
Potri.014G027600	-4.9	9.1e-05	TRUE
Potri.015G125300	-4.9	1.8e-05	TRUE
Potri.019G012800	-4.9	0.047	TRUE
Potri.001G110500	-4.8	0.013	TRUE
Potri.005G244600	-4.8	5.6e-19	TRUE
Potri.007G049500	-4.8	4e-08	TRUE
Potri.007G110600	-4.8	2.1e-36	TRUE
Potri.009G065200	-4.8	0.012	TRUE
Potri.012G013400	-4.8	0.0059	TRUE
Potri.014G027400	-4.8	0.0011	TRUE
Potri.014G027500	-4.8	0.013	TRUE
Potri.015G026300	-4.8	2.1e-09	TRUE
Potri.016G046500	-4.8	3e-06	TRUE
Potri.017G050400	-4.8	4.1e-11	TRUE
Potri.017G096500	-4.8	0.0012	TRUE
Potri.001G028900	-4.7	0.0083	TRUE
Potri.005G106100	-4.7	0.0066	TRUE
Potri.009G017900	-4.7	2.2e-08	TRUE
Potri.009G145000	-4.7	9e-12	TRUE
Potri.009G145400	-4.7	2e-13	TRUE
Potri.010G075800	-4.7	4.8e-08	TRUE
Potri.012G078900	-4.7	1.9e-36	TRUE
Potri.014G034000	-4.7	4.6e-09	TRUE
Potri.014G155000	-4.7	3e-21	TRUE
Potri.015G099300	-4.7	0.018	TRUE
Potri.018G010700	-4.7	0.017	TRUE
Potri.001G442200	-4.6	3.7e-08	TRUE
Potri.002G101600	-4.6	5.3e-19	TRUE
Potri.003G011200	-4.6	1.6e-13	TRUE
Potri.004G061300	-4.6	4e-12	TRUE
Potri.006G022500	-4.6	6.6e-16	TRUE
Potri.009G060400	-4.6	0.00062	TRUE
Potri.009G128800	-4.6	8.4e-07	TRUE
Potri.010G217200	-4.6	3.1e-11	TRUE
Potri.011G161600	-4.6	1.8e-09	TRUE
Potri.014G038600	-4.6	9.3e-07	TRUE
Potri.017G096300	-4.6	0.0003	TRUE
Potri.T139100	-4.6	0.033	TRUE
Potri.001G020000	-4.5	0.021	TRUE
Potri.001G263400	-4.5	1.1e-45	TRUE
Potri.001G456700	-4.5	0.0091	TRUE
Potri.002G235800	-4.5	4.4e-13	TRUE
Potri.004G074000	-4.5	6.6e-17	TRUE
Potri.004G084200	-4.5	0.018	TRUE
Potri.005G081300	-4.5	1.2e-10	TRUE
Potri.006G128900	-4.5	0.00021	TRUE
Potri.007G050300	-4.5	6.2e-09	TRUE
Potri.008G127800	-4.5	1.1e-09	TRUE
Potri.009G099200	-4.5	5.5e-17	TRUE
Potri.010G064000	-4.5	2.6e-10	TRUE
Potri.010G100500	-4.5	1.5e-07	TRUE
Potri.011G112400	-4.5	4.5e-42	TRUE
Potri.013G041900	-4.5	5e-06	TRUE
Potri.015G145100	-4.5	0.00019	TRUE
Potri.017G102100	-4.5	2e-17	TRUE
Potri.018G010400	-4.5	0.0081	TRUE
Potri.018G134000	-4.5	0.00016	TRUE
Potri.T096300	-4.5	1.3e-47	TRUE
Potri.001G029700	-4.4	4e-16	TRUE
Potri.001G040900	-4.4	0.00073	TRUE
Potri.002G104500	-4.4	6.4e-06	TRUE
Potri.003G199100	-4.4	0.0039	TRUE
Potri.004G068200	-4.4	2.6e-08	TRUE
Potri.006G167900	-4.4	0.025	TRUE
Potri.006G204300	-4.4	1.8e-39	TRUE
Potri.008G061600	-4.4	7.8e-28	TRUE
Potri.009G055000	-4.4	0.017	TRUE
Potri.009G062700	-4.4	6.2e-19	TRUE
Potri.009G090600	-4.4	5.8e-40	TRUE
Potri.011G030700	-4.4	0.00049	TRUE
Potri.011G082400	-4.4	5.4e-05	TRUE
Potri.011G157900	-4.4	0.0023	TRUE
Potri.001G162000	-4.3	4e-43	TRUE
Potri.001G268600	-4.3	1.5e-14	TRUE
Potri.001G307500	-4.3	8.5e-06	TRUE
Potri.001G374800	-4.3	3e-06	TRUE
Potri.001G404100	-4.3	2.5e-36	TRUE
Potri.005G181200	-4.3	3.3e-15	TRUE
Potri.006G181200	-4.3	0.018	TRUE
Potri.008G068700	-4.3	6.2e-25	TRUE
Potri.009G035500	-4.3	0.0026	TRUE
Potri.009G120100	-4.3	0.0064	TRUE
Potri.010G006800	-4.3	2.3e-22	TRUE
Potri.010G064200	-4.3	2.1e-14	TRUE
Potri.011G037600	-4.3	5e-16	TRUE
Potri.011G064300	-4.3	1.3e-05	TRUE
Potri.011G123300	-4.3	1.7e-27	TRUE
Potri.012G042600	-4.3	2.7e-07	TRUE
Potri.012G104600	-4.3	5.6e-30	TRUE
Potri.012G124800	-4.3	5.6e-12	TRUE
Potri.014G033900	-4.3	3.2e-08	TRUE
Potri.018G057800	-4.3	0.034	TRUE
Potri.019G075600	-4.3	1.4e-05	TRUE
Potri.019G118200	-4.3	9.7e-05	TRUE
Potri.T018600	-4.3	0.018	TRUE
Potri.T148100	-4.3	0.048	TRUE
Potri.002G019300	-4.2	1e-23	TRUE
Potri.002G029400	-4.2	2.4e-05	TRUE
Potri.002G121300	-4.2	1e-05	TRUE
Potri.003G073300	-4.2	5.5e-27	TRUE
Potri.004G158500	-4.2	4.1e-06	TRUE
Potri.004G223500	-4.2	1.7e-07	TRUE
Potri.006G063800	-4.2	0.002	TRUE
Potri.008G101400	-4.2	2.3e-69	TRUE
Potri.009G033500	-4.2	2.3e-06	TRUE
Potri.010G205200	-4.2	1.7e-15	TRUE
Potri.013G012600	-4.2	4.1e-15	TRUE
Potri.014G027700	-4.2	0.049	TRUE
Potri.017G075900	-4.2	4.1e-08	TRUE
Potri.017G124200	-4.2	4.2e-07	TRUE
Potri.018G135100	-4.2	3.9e-05	TRUE
Potri.001G171700	-4.1	0.0045	TRUE
Potri.001G224800	-4.1	0.02	TRUE
Potri.002G108900	-4.1	1e-09	TRUE
Potri.002G203500	-4.1	9e-23	TRUE
Potri.003G196700	-4.1	0.0094	TRUE
Potri.005G215700	-4.1	8.8e-14	TRUE
Potri.007G088900	-4.1	0.011	TRUE
Potri.008G109500	-4.1	4.9e-10	TRUE
Potri.009G010200	-4.1	3.8e-12	TRUE
Potri.009G035800	-4.1	1.5e-09	TRUE
Potri.009G067900	-4.1	0.02	TRUE
Potri.010G075200	-4.1	0.00055	TRUE
Potri.010G107200	-4.1	4.9e-19	TRUE
Potri.011G025900	-4.1	6.4e-08	TRUE
Potri.011G159500	-4.1	0.046	TRUE
Potri.011G160100	-4.1	0.0015	TRUE
Potri.015G031000	-4.1	4.5e-10	TRUE
Potri.015G120800	-4.1	6.6e-11	TRUE
Potri.016G112400	-4.1	1.3e-13	TRUE
Potri.017G040500	-4.1	0.00063	TRUE
Potri.T095500	-4.1	0.0015	TRUE
Potri.001G166200	-4	1e-20	TRUE
Potri.001G263200	-4	0.032	TRUE
Potri.001G374700	-4	3.8e-06	TRUE
Potri.001G393900	-4	0.0028	TRUE
Potri.006G037800	-4	2.2e-13	TRUE
Potri.006G138900	-4	4.8e-26	TRUE
Potri.006G273000	-4	3.3e-24	TRUE
Potri.007G067600	-4	1.3e-09	TRUE
Potri.008G043900	-4	1.9e-24	TRUE
Potri.008G154800	-4	1.5e-18	TRUE
Potri.008G197500	-4	1.2e-15	TRUE
Potri.009G063000	-4	8.6e-10	TRUE
Potri.009G109500	-4	9.2e-16	TRUE
Potri.010G187000	-4	2.6e-19	TRUE
Potri.012G032300	-4	0.024	TRUE
Potri.012G082800	-4	3.7e-11	TRUE
Potri.012G133500	-4	2e-06	TRUE
Potri.017G052200	-4	0.00086	TRUE
Potri.017G095700	-4	0.00036	TRUE
Potri.017G121200	-4	0.0009	TRUE
Potri.018G043500	-4	0.0011	TRUE
Potri.001G219100	-3.9	3.1e-48	TRUE
Potri.001G317000	-3.9	7.5e-11	TRUE
Potri.001G332900	-3.9	1.7e-07	TRUE
Potri.001G442000	-3.9	3.4e-07	TRUE
Potri.002G000600	-3.9	0.029	TRUE
Potri.003G168400	-3.9	0.038	TRUE
Potri.005G167000	-3.9	3.1e-19	TRUE
Potri.005G183300	-3.9	2.8e-06	TRUE
Potri.005G243800	-3.9	0.00012	TRUE
Potri.009G034600	-3.9	0.0023	TRUE
Potri.009G169900	-3.9	2.7e-13	TRUE
Potri.010G089800	-3.9	9e-46	TRUE
Potri.011G081700	-3.9	0.00034	TRUE
Potri.017G080900	-3.9	0.00052	TRUE
Potri.T097600	-3.9	7.3e-14	TRUE
Potri.T181500	-3.9	0.0027	TRUE
Potri.001G044600	-3.8	3.3e-08	TRUE
Potri.001G192800	-3.8	3.9e-28	TRUE
Potri.001G194100	-3.8	8.8e-32	TRUE
Potri.002G065600	-3.8	3.7e-25	TRUE
Potri.003G062300	-3.8	0.0053	TRUE
Potri.005G064400	-3.8	5.2e-09	TRUE
Potri.006G169000	-3.8	5e-10	TRUE
Potri.006G270400	-3.8	0.0091	TRUE
Potri.007G007800	-3.8	5.7e-08	TRUE
Potri.007G027900	-3.8	3.4e-22	TRUE
Potri.007G103400	-3.8	0.0015	TRUE
Potri.007G111600	-3.8	3.6e-05	TRUE
Potri.009G104100	-3.8	2.5e-13	TRUE
Potri.009G133500	-3.8	2.5e-22	TRUE
Potri.010G192400	-3.8	4e-24	TRUE
Potri.011G114600	-3.8	1.7e-15	TRUE
Potri.011G125400	-3.8	3.9e-17	TRUE
Potri.013G023900	-3.8	0.037	TRUE
Potri.013G157200	-3.8	0.011	TRUE
Potri.014G038000	-3.8	1.7e-06	TRUE
Potri.014G038100	-3.8	7.8e-06	TRUE
Potri.015G065700	-3.8	0.00015	TRUE
Potri.015G102300	-3.8	4.6e-10	TRUE
Potri.016G015600	-3.8	5.3e-08	TRUE
Potri.016G078300	-3.8	2.3e-20	TRUE
Potri.018G113700	-3.8	1.8e-22	TRUE
Potri.019G117600	-3.8	3.3e-07	TRUE
Potri.001G030600	-3.7	0.00079	TRUE
Potri.001G113900	-3.7	1.3e-14	TRUE
Potri.001G214600	-3.7	5e-06	TRUE
Potri.001G228300	-3.7	1.3e-06	TRUE
Potri.002G033400	-3.7	3.8e-25	TRUE
Potri.002G094300	-3.7	0.0093	TRUE
Potri.002G169600	-3.7	0.00025	TRUE
Potri.002G228400	-3.7	1.5e-19	TRUE
Potri.003G068900	-3.7	2.3e-27	TRUE
Potri.003G118100	-3.7	9.2e-13	TRUE
Potri.003G147300	-3.7	1.7e-11	TRUE
Potri.005G169700	-3.7	2.1e-27	TRUE
Potri.005G205200	-3.7	0.0069	TRUE
Potri.005G205900	-3.7	9e-07	TRUE
Potri.006G101200	-3.7	0.0012	TRUE
Potri.006G202700	-3.7	2.2e-07	TRUE
Potri.008G154900	-3.7	0.0015	TRUE
Potri.010G055200	-3.7	9.9e-12	TRUE
Potri.010G075500	-3.7	0.0016	TRUE
Potri.011G039500	-3.7	0.00012	TRUE
Potri.011G041600	-3.7	1.1e-24	TRUE
Potri.011G083900	-3.7	0.00035	TRUE
Potri.011G113200	-3.7	5.6e-07	TRUE
Potri.012G141300	-3.7	1.2e-10	TRUE
Potri.013G157300	-3.7	0.017	TRUE
Potri.016G101300	-3.7	3.2e-06	TRUE
Potri.019G124700	-3.7	5e-07	TRUE
Potri.T018000	-3.7	0.01	TRUE
Potri.T043800	-3.7	3.3e-11	TRUE
Potri.T137100	-3.7	0.00024	TRUE
Potri.001G119000	-3.6	1.3e-23	TRUE
Potri.003G061200	-3.6	0.018	TRUE
Potri.003G133200	-3.6	1.5e-10	TRUE
Potri.003G159800	-3.6	1.6e-25	TRUE
Potri.004G000400	-3.6	3.2e-05	TRUE
Potri.004G075900	-3.6	1.2e-10	TRUE
Potri.004G192900	-3.6	0.0041	TRUE
Potri.005G139200	-3.6	1.9e-18	TRUE
Potri.005G221000	-3.6	0.018	TRUE
Potri.009G037300	-3.6	1.8e-15	TRUE
Potri.009G062800	-3.6	4e-17	TRUE
Potri.009G063100	-3.6	3.6e-06	TRUE
Potri.011G037400	-3.6	7.9e-25	TRUE
Potri.011G061700	-3.6	2.1e-51	TRUE
Potri.013G005900	-3.6	2.8e-29	TRUE
Potri.013G151000	-3.6	6.2e-13	TRUE
Potri.014G038200	-3.6	0.013	TRUE
Potri.014G039000	-3.6	1.2e-16	TRUE
Potri.014G047000	-3.6	2.2e-07	TRUE
Potri.018G031700	-3.6	6.3e-05	TRUE
Potri.018G105400	-3.6	1e-05	TRUE
Potri.019G093700	-3.6	0.00043	TRUE
Potri.001G110700	-3.5	6.8e-05	TRUE
Potri.001G276400	-3.5	5.3e-14	TRUE
Potri.001G313900	-3.5	3e-67	TRUE
Potri.001G375100	-3.5	0.00011	TRUE
Potri.002G065700	-3.5	0.014	TRUE
Potri.002G092200	-3.5	4e-09	TRUE
Potri.003G061100	-3.5	0.00026	TRUE
Potri.003G177200	-3.5	0.00054	TRUE
Potri.004G037900	-3.5	0.00014	TRUE
Potri.005G002300	-3.5	6.1e-05	TRUE
Potri.008G134100	-3.5	1.5e-16	TRUE
Potri.010G012100	-3.5	9.6e-13	TRUE
Potri.010G057000	-3.5	4.2e-21	TRUE
Potri.010G208600	-3.5	5.2e-06	TRUE
Potri.012G054500	-3.5	5.2e-09	TRUE
Potri.012G145500	-3.5	1.4e-11	TRUE
Potri.013G029100	-3.5	2.2e-08	TRUE
Potri.014G116800	-3.5	2.7e-13	TRUE
Potri.015G144500	-3.5	3.9e-06	TRUE
Potri.016G129800	-3.5	0.0098	TRUE
Potri.016G131700	-3.5	0.0011	TRUE
Potri.019G091400	-3.5	3e-13	TRUE
Potri.T079800	-3.5	1e-22	TRUE
Potri.T097900	-3.5	4.2e-08	TRUE
Potri.T098100	-3.5	7.4e-06	TRUE
Potri.T106400	-3.5	7.8e-17	TRUE
Potri.001G073100	-3.4	4.4e-20	TRUE
Potri.001G296400	-3.4	1.1e-43	TRUE
Potri.001G324500	-3.4	5.1e-10	TRUE
Potri.001G461700	-3.4	0.034	TRUE
Potri.005G058800	-3.4	4.7e-06	TRUE
Potri.005G129400	-3.4	1.9e-06	TRUE
Potri.005G161700	-3.4	6.8e-05	TRUE
Potri.006G021600	-3.4	1.6e-20	TRUE
Potri.006G033600	-3.4	0.017	TRUE
Potri.006G036200	-3.4	2.6e-08	TRUE
Potri.006G207700	-3.4	5.2e-07	TRUE
Potri.006G260600	-3.4	0.021	TRUE
Potri.007G022300	-3.4	6.8e-47	TRUE
Potri.008G175900	-3.4	4.1e-16	TRUE
Potri.009G010900	-3.4	7.3e-23	TRUE
Potri.009G027200	-3.4	4.2e-11	TRUE
Potri.009G085300	-3.4	0.0047	TRUE
Potri.010G011700	-3.4	2e-09	TRUE
Potri.010G085200	-3.4	0.0034	TRUE
Potri.010G125900	-3.4	2.7e-05	TRUE
Potri.010G129600	-3.4	5.4e-13	TRUE
Potri.010G251800	-3.4	2.5e-30	TRUE
Potri.011G162700	-3.4	0.013	TRUE
Potri.012G002700	-3.4	1.8e-26	TRUE
Potri.012G031700	-3.4	3.7e-07	TRUE
Potri.012G131800	-3.4	2e-32	TRUE
Potri.013G135600	-3.4	5.9e-19	TRUE
Potri.015G104400	-3.4	3.9e-11	TRUE
Potri.018G094800	-3.4	5e-05	TRUE
Potri.019G073300	-3.4	2.4e-05	TRUE
Potri.T151700	-3.4	4.3e-13	TRUE
Potri.001G136100	-3.3	3.7e-20	TRUE
Potri.001G156700	-3.3	4e-13	TRUE
Potri.001G240700	-3.3	0.019	TRUE
Potri.002G139800	-3.3	4.6e-17	TRUE
Potri.002G191800	-3.3	0.0006	TRUE
Potri.003G103900	-3.3	1.3e-20	TRUE
Potri.003G134800	-3.3	4.6e-06	TRUE
Potri.004G149000	-3.3	5.4e-13	TRUE
Potri.005G244800	-3.3	1.6e-11	TRUE
Potri.006G248300	-3.3	8.7e-19	TRUE
Potri.009G072200	-3.3	0.0003	TRUE
Potri.009G106000	-3.3	8.1e-05	TRUE
Potri.009G110600	-3.3	2.3e-08	TRUE
Potri.009G150000	-3.3	0.00023	TRUE
Potri.010G047100	-3.3	8.1e-06	TRUE
Potri.011G039600	-3.3	6.7e-07	TRUE
Potri.011G056900	-3.3	1.7e-13	TRUE
Potri.011G113400	-3.3	3.7e-07	TRUE
Potri.011G114000	-3.3	1e-27	TRUE
Potri.012G054700	-3.3	4e-13	TRUE
Potri.012G134000	-3.3	2.9e-10	TRUE
Potri.013G008800	-3.3	4.3e-06	TRUE
Potri.014G022000	-3.3	0.00072	TRUE
Potri.018G062600	-3.3	0.0027	TRUE
Potri.018G094000	-3.3	1e-12	TRUE
Potri.018G102600	-3.3	6.6e-06	TRUE
Potri.001G142800	-3.2	2.5e-06	TRUE
Potri.001G230900	-3.2	2.7e-10	TRUE
Potri.001G374300	-3.2	0.019	TRUE
Potri.001G441400	-3.2	4.4e-05	TRUE
Potri.002G002100	-3.2	1.3e-15	TRUE
Potri.002G073900	-3.2	0.023	TRUE
Potri.002G171200	-3.2	1.1e-08	TRUE
Potri.003G054600	-3.2	0.0034	TRUE
Potri.004G076200	-3.2	2.9e-09	TRUE
Potri.005G068700	-3.2	4.5e-62	TRUE
Potri.005G224100	-3.2	5.9e-10	TRUE
Potri.006G055800	-3.2	2.2e-11	TRUE
Potri.007G039500	-3.2	4e-08	TRUE
Potri.008G028900	-3.2	1.8e-14	TRUE
Potri.008G155100	-3.2	9.5e-06	TRUE
Potri.009G026900	-3.2	2.9e-05	TRUE
Potri.009G081400	-3.2	5.9e-26	TRUE
Potri.010G023700	-3.2	3.5e-10	TRUE
Potri.010G099600	-3.2	2.8e-08	TRUE
Potri.010G119200	-3.2	4.5e-06	TRUE
Potri.011G037300	-3.2	4.4e-20	TRUE
Potri.011G063600	-3.2	0.016	TRUE
Potri.011G111100	-3.2	0.0023	TRUE
Potri.011G136300	-3.2	2e-17	TRUE
Potri.012G034900	-3.2	2.6e-06	TRUE
Potri.012G054800	-3.2	3.2e-13	TRUE
Potri.012G108500	-3.2	0.00059	TRUE
Potri.013G137200	-3.2	3.3e-24	TRUE
Potri.014G023100	-3.2	4.9e-06	TRUE
Potri.014G033500	-3.2	1.2e-05	TRUE
Potri.014G104100	-3.2	5.6e-08	TRUE
Potri.015G015500	-3.2	0.041	TRUE
Potri.015G135600	-3.2	1.4e-07	TRUE
Potri.016G016100	-3.2	1.4e-09	TRUE
Potri.017G083500	-3.2	0.004	TRUE
Potri.T004600	-3.2	8e-07	TRUE
Potri.T079700	-3.2	0.011	TRUE
Potri.T097300	-3.2	2.9e-07	TRUE
Potri.001G020600	-3.1	2.9e-06	TRUE
Potri.001G222900	-3.1	0.009	TRUE
Potri.001G402600	-3.1	5e-08	TRUE
Potri.002G043000	-3.1	0.028	TRUE
Potri.002G204200	-3.1	0.00054	TRUE
Potri.003G019900	-3.1	0.002	TRUE
Potri.003G113100	-3.1	3.4e-06	TRUE
Potri.003G131900	-3.1	0.0021	TRUE
Potri.003G160000	-3.1	1.4e-29	TRUE
Potri.003G193500	-3.1	0.00027	TRUE
Potri.005G004800	-3.1	5.9e-06	TRUE
Potri.005G181000	-3.1	0.0013	TRUE
Potri.006G017900	-3.1	0.0022	TRUE
Potri.006G073400	-3.1	6.4e-09	TRUE
Potri.007G105800	-3.1	1.2e-07	TRUE
Potri.008G141100	-3.1	7.9e-06	TRUE
Potri.009G027100	-3.1	1.6e-20	TRUE
Potri.010G075300	-3.1	0.02	TRUE
Potri.010G165300	-3.1	0.00054	TRUE
Potri.010G205300	-3.1	0.029	TRUE
Potri.011G057000	-3.1	2.4e-23	TRUE
Potri.012G089500	-3.1	5.9e-15	TRUE
Potri.013G083600	-3.1	2.7e-07	TRUE
Potri.013G131700	-3.1	0.00018	TRUE
Potri.014G108800	-3.1	0.002	TRUE
Potri.015G111000	-3.1	1.1e-10	TRUE
Potri.018G043100	-3.1	0.0077	TRUE
Potri.018G138300	-3.1	3.7e-05	TRUE
Potri.019G120600	-3.1	0.00026	TRUE
Potri.T019200	-3.1	0.02	TRUE
Potri.T024100	-3.1	2.3e-15	TRUE
Potri.T158400	-3.1	2e-05	TRUE
Potri.T158500	-3.1	1.8e-05	TRUE
Potri.001G060900	-3	0.0033	TRUE
Potri.001G092100	-3	1.1e-06	TRUE
Potri.002G102100	-3	5.7e-19	TRUE
Potri.002G226700	-3	1.8e-08	TRUE
Potri.003G061000	-3	0.016	TRUE
Potri.003G122400	-3	6.7e-10	TRUE
Potri.003G130000	-3	0.0067	TRUE
Potri.003G165000	-3	1.5e-06	TRUE
Potri.004G177900	-3	0.0056	TRUE
Potri.005G098000	-3	0.00063	TRUE
Potri.005G195000	-3	3.2e-14	TRUE
Potri.005G214200	-3	1.8e-10	TRUE
Potri.006G094300	-3	1.4e-13	TRUE
Potri.006G202600	-3	1.4e-06	TRUE
Potri.007G097000	-3	7.7e-20	TRUE
Potri.008G028200	-3	0.0017	TRUE
Potri.008G055900	-3	1.1e-32	TRUE
Potri.008G062500	-3	4.3e-12	TRUE
Potri.008G087900	-3	0.0015	TRUE
Potri.008G114600	-3	0.00037	TRUE
Potri.008G154700	-3	3.1e-07	TRUE
Potri.008G174100	-3	1.9e-18	TRUE
Potri.008G176000	-3	6.4e-28	TRUE
Potri.009G063200	-3	0.00047	TRUE
Potri.009G079200	-3	0.048	TRUE
Potri.009G118300	-3	1.8e-13	TRUE
Potri.009G134400	-3	0.016	TRUE
Potri.010G075400	-3	0.0057	TRUE
Potri.010G245300	-3	4e-07	TRUE
Potri.011G003200	-3	6.9e-14	TRUE
Potri.011G031800	-3	3.1e-07	TRUE
Potri.011G162900	-3	0.0016	TRUE
Potri.012G033900	-3	0.00042	TRUE
Potri.013G043600	-3	0.00084	TRUE
Potri.014G020300	-3	2.4e-05	TRUE
Potri.014G108900	-3	0.0046	TRUE
Potri.015G061600	-3	1.7e-21	TRUE
Potri.015G074500	-3	4.3e-09	TRUE
Potri.015G076500	-3	1.2e-20	TRUE
Potri.016G024400	-3	5.5e-07	TRUE
Potri.016G132900	-3	0.0039	TRUE
Potri.018G098000	-3	2.1e-14	TRUE
Potri.018G129200	-3	2e-21	TRUE
Potri.019G110000	-3	3e-05	TRUE
Potri.001G192600	-2.9	2.5e-05	TRUE
Potri.001G331100	-2.9	1.7e-09	TRUE
Potri.001G452000	-2.9	0.00025	TRUE
Potri.002G039100	-2.9	5.3e-15	TRUE
Potri.002G166300	-2.9	1.4e-12	TRUE
Potri.003G059900	-2.9	1.5e-12	TRUE
Potri.003G072400	-2.9	0.026	TRUE
Potri.004G034400	-2.9	8.4e-18	TRUE
Potri.004G049200	-2.9	6.8e-07	TRUE
Potri.004G051700	-2.9	7.6e-14	TRUE
Potri.004G065000	-2.9	2.2e-07	TRUE
Potri.004G090600	-2.9	1.2e-06	TRUE
Potri.004G101400	-2.9	6.5e-05	TRUE
Potri.004G230000	-2.9	6e-27	TRUE
Potri.005G072600	-2.9	1.2e-07	TRUE
Potri.006G110900	-2.9	0.022	TRUE
Potri.006G206900	-2.9	3.2e-12	TRUE
Potri.007G111800	-2.9	4.1e-05	TRUE
Potri.008G093200	-2.9	0.00012	TRUE
Potri.008G103300	-2.9	2.4e-39	TRUE
Potri.008G123500	-2.9	2.2e-12	TRUE
Potri.008G164300	-2.9	6.3e-05	TRUE
Potri.009G081800	-2.9	1.2e-14	TRUE
Potri.009G098400	-2.9	0.00072	TRUE
Potri.010G119100	-2.9	2.9e-53	TRUE
Potri.010G181300	-2.9	6.9e-11	TRUE
Potri.010G204700	-2.9	6.1e-08	TRUE
Potri.011G007800	-2.9	1.7e-23	TRUE
Potri.011G113000	-2.9	8.4e-14	TRUE
Potri.011G125000	-2.9	5.2e-07	TRUE
Potri.012G101000	-2.9	0.0072	TRUE
Potri.013G083500	-2.9	3.9e-15	TRUE
Potri.013G118600	-2.9	2e-07	TRUE
Potri.014G113500	-2.9	2.7e-06	TRUE
Potri.017G003400	-2.9	0.00058	TRUE
Potri.T027800	-2.9	0.022	TRUE
Potri.T064400	-2.9	0.00016	TRUE
Potri.T075300	-2.9	0.0073	TRUE
Potri.T156100	-2.9	9e-06	TRUE
Potri.001G027000	-2.8	4.8e-18	TRUE
Potri.001G100200	-2.8	1.8e-05	TRUE
Potri.001G435900	-2.8	0.0011	TRUE
Potri.002G091600	-2.8	8.8e-10	TRUE
Potri.002G174600	-2.8	0.0022	TRUE
Potri.004G083900	-2.8	0.0068	TRUE
Potri.004G095700	-2.8	1.4e-11	TRUE
Potri.004G201300	-2.8	0.0029	TRUE
Potri.004G209300	-2.8	2e-14	TRUE
Potri.005G122400	-2.8	2.8e-11	TRUE
Potri.005G197500	-2.8	1.1e-29	TRUE
Potri.006G022800	-2.8	4.1e-07	TRUE
Potri.006G042400	-2.8	1.9e-05	TRUE
Potri.006G120600	-2.8	2.5e-06	TRUE
Potri.006G214300	-2.8	6.1e-09	TRUE
Potri.007G029500	-2.8	1.8e-08	TRUE
Potri.008G018900	-2.8	5e-05	TRUE
Potri.008G059800	-2.8	3.4e-16	TRUE
Potri.009G085800	-2.8	1e-08	TRUE
Potri.009G089400	-2.8	1.2e-20	TRUE
Potri.010G002600	-2.8	4.9e-09	TRUE
Potri.010G149900	-2.8	2.4e-11	TRUE
Potri.010G192100	-2.8	0.027	TRUE
Potri.012G067600	-2.8	3.6e-06	TRUE
Potri.014G033200	-2.8	0.00098	TRUE
Potri.014G113200	-2.8	2.7e-07	TRUE
Potri.014G179400	-2.8	1.1e-06	TRUE
Potri.016G016300	-2.8	1.3e-05	TRUE
Potri.016G106800	-2.8	3.7e-09	TRUE
Potri.017G108300	-2.8	3.9e-07	TRUE
Potri.017G152900	-2.8	5.9e-25	TRUE
Potri.001G039200	-2.7	6.3e-06	TRUE
Potri.001G046100	-2.7	4.9e-08	TRUE
Potri.001G192100	-2.7	0.0072	TRUE
Potri.001G225800	-2.7	3e-07	TRUE
Potri.001G290200	-2.7	1.3e-17	TRUE
Potri.001G323500	-2.7	9.5e-08	TRUE
Potri.001G372500	-2.7	0.0023	TRUE
Potri.001G380800	-2.7	7.1e-08	TRUE
Potri.002G080700	-2.7	0.0033	TRUE
Potri.002G150100	-2.7	0.013	TRUE
Potri.003G122900	-2.7	1.1e-32	TRUE
Potri.003G144000	-2.7	1.7e-05	TRUE
Potri.004G019900	-2.7	6.9e-07	TRUE
Potri.004G070900	-2.7	0.043	TRUE
Potri.004G184600	-2.7	0.021	TRUE
Potri.005G240300	-2.7	5.4e-62	TRUE
Potri.006G055100	-2.7	0.019	TRUE
Potri.006G055600	-2.7	3e-05	TRUE
Potri.007G006900	-2.7	0.0081	TRUE
Potri.008G067700	-2.7	2e-24	TRUE
Potri.008G089000	-2.7	4.8e-17	TRUE
Potri.008G096500	-2.7	5.6e-31	TRUE
Potri.009G027700	-2.7	0.0032	TRUE
Potri.009G148800	-2.7	2.6e-17	TRUE
Potri.010G230400	-2.7	7.5e-07	TRUE
Potri.010G252700	-2.7	0.00021	TRUE
Potri.011G063000	-2.7	0.00019	TRUE
Potri.011G157200	-2.7	0.044	TRUE
Potri.012G060900	-2.7	3e-20	TRUE
Potri.012G089400	-2.7	9.6e-20	TRUE
Potri.012G110300	-2.7	0.038	TRUE
Potri.013G090400	-2.7	0.0007	TRUE
Potri.013G103300	-2.7	2.3e-05	TRUE
Potri.013G157400	-2.7	0.023	TRUE
Potri.014G039400	-2.7	0.00014	TRUE
Potri.014G132500	-2.7	9.2e-12	TRUE
Potri.015G015800	-2.7	9e-12	TRUE
Potri.015G075900	-2.7	0.0094	TRUE
Potri.015G099800	-2.7	4.8e-15	TRUE
Potri.016G023300	-2.7	1.5e-05	TRUE
Potri.016G069400	-2.7	3.8e-09	TRUE
Potri.016G108800	-2.7	2e-08	TRUE
Potri.016G129400	-2.7	0.037	TRUE
Potri.017G039600	-2.7	3.2e-08	TRUE
Potri.017G119800	-2.7	6.8e-06	TRUE
Potri.017G120600	-2.7	0.036	TRUE
Potri.018G008300	-2.7	3.1e-05	TRUE
Potri.018G096500	-2.7	0.0025	TRUE
Potri.018G099200	-2.7	0.00013	TRUE
Potri.019G099200	-2.7	0.00032	TRUE
Potri.T131900	-2.7	2.5e-07	TRUE
Potri.001G010300	-2.6	5.4e-07	TRUE
Potri.001G044500	-2.6	2.5e-26	TRUE
Potri.001G078300	-2.6	7.1e-15	TRUE
Potri.001G083500	-2.6	0.00044	TRUE
Potri.001G110800	-2.6	0.01	TRUE
Potri.001G283400	-2.6	0.00015	TRUE
Potri.001G298300	-2.6	8.7e-17	TRUE
Potri.001G375000	-2.6	0.018	TRUE
Potri.001G413400	-2.6	0.0092	TRUE
Potri.001G441700	-2.6	0.004	TRUE
Potri.002G022600	-2.6	3.3e-07	TRUE
Potri.002G044700	-2.6	0.017	TRUE
Potri.002G150200	-2.6	0.0036	TRUE
Potri.002G206100	-2.6	4.3e-06	TRUE
Potri.003G064600	-2.6	0.00034	TRUE
Potri.003G124000	-2.6	6.9e-07	TRUE
Potri.003G182200	-2.6	1.5e-09	TRUE
Potri.004G068100	-2.6	1.5e-08	TRUE
Potri.004G076000	-2.6	1e-07	TRUE
Potri.004G129100	-2.6	0.0079	TRUE
Potri.005G139400	-2.6	1.3e-07	TRUE
Potri.006G023100	-2.6	3e-05	TRUE
Potri.006G048100	-2.6	0.015	TRUE
Potri.006G048200	-2.6	0.0033	TRUE
Potri.006G066600	-2.6	1.2e-10	TRUE
Potri.006G232900	-2.6	7.2e-53	TRUE
Potri.007G055500	-2.6	1.4e-21	TRUE
Potri.007G146400	-2.6	9.2e-36	TRUE
Potri.009G080600	-2.6	6.3e-12	TRUE
Potri.010G092400	-2.6	0.00033	TRUE
Potri.010G123700	-2.6	8.3e-07	TRUE
Potri.010G184400	-2.6	0.00056	TRUE
Potri.010G186700	-2.6	4.8e-15	TRUE
Potri.010G226200	-2.6	1e-16	TRUE
Potri.011G145200	-2.6	1.5e-14	TRUE
Potri.012G075800	-2.6	7e-14	TRUE
Potri.013G102900	-2.6	0.00036	TRUE
Potri.014G066400	-2.6	8.2e-09	TRUE
Potri.014G069100	-2.6	8.2e-22	TRUE
Potri.014G103000	-2.6	2.8e-11	TRUE
Potri.014G156400	-2.6	2.4e-14	TRUE
Potri.015G091900	-2.6	1.9e-06	TRUE
Potri.016G009500	-2.6	3.3e-05	TRUE
Potri.016G035200	-2.6	4e-27	TRUE
Potri.017G094500	-2.6	6.6e-20	TRUE
Potri.017G108400	-2.6	1.2e-07	TRUE
Potri.018G012000	-2.6	0.044	TRUE
Potri.018G105500	-2.6	0.00027	TRUE
Potri.018G119400	-2.6	0.018	TRUE
Potri.T022800	-2.6	2.4e-07	TRUE
Potri.T027900	-2.6	0.012	TRUE
Potri.T098200	-2.6	0.00016	TRUE
Potri.001G041100	-2.5	1e-05	TRUE
Potri.001G067600	-2.5	1.1e-08	TRUE
Potri.001G168200	-2.5	1.9e-70	TRUE
Potri.001G310400	-2.5	1.2e-08	TRUE
Potri.001G325100	-2.5	1.4e-21	TRUE
Potri.001G401600	-2.5	1.8e-29	TRUE
Potri.002G142200	-2.5	1.8e-05	TRUE
Potri.002G155300	-2.5	0.016	TRUE
Potri.002G231900	-2.5	1.3e-22	TRUE
Potri.003G091400	-2.5	2.7e-14	TRUE
Potri.003G096100	-2.5	4e-42	TRUE
Potri.003G099000	-2.5	0.0077	TRUE
Potri.003G176900	-2.5	2.5e-09	TRUE
Potri.004G015900	-2.5	2e-07	TRUE
Potri.004G095200	-2.5	8.3e-05	TRUE
Potri.004G129900	-2.5	4e-72	TRUE
Potri.004G167500	-2.5	2.3e-24	TRUE
Potri.005G024800	-2.5	3.7e-11	TRUE
Potri.005G043300	-2.5	0.0044	TRUE
Potri.005G087200	-2.5	3.7e-09	TRUE
Potri.005G093200	-2.5	5.1e-16	TRUE
Potri.005G141000	-2.5	0.0012	TRUE
Potri.005G181800	-2.5	0.00039	TRUE
Potri.005G214000	-2.5	7.9e-12	TRUE
Potri.005G247300	-2.5	2.8e-11	TRUE
Potri.006G006300	-2.5	1.2e-16	TRUE
Potri.006G041300	-2.5	0.022	TRUE
Potri.006G068300	-2.5	0.00047	TRUE
Potri.006G183800	-2.5	7.4e-06	TRUE
Potri.006G209200	-2.5	1.8e-05	TRUE
Potri.007G024000	-2.5	0.013	TRUE
Potri.007G076600	-2.5	4.4e-05	TRUE
Potri.008G025200	-2.5	0.028	TRUE
Potri.008G090900	-2.5	0.0062	TRUE
Potri.008G119600	-2.5	6.1e-34	TRUE
Potri.009G099100	-2.5	0.016	TRUE
Potri.009G167300	-2.5	0.0012	TRUE
Potri.010G106900	-2.5	1.3e-06	TRUE
Potri.010G121800	-2.5	4.6e-09	TRUE
Potri.010G182500	-2.5	9.8e-14	TRUE
Potri.010G225400	-2.5	4.6e-11	TRUE
Potri.011G029200	-2.5	0.0036	TRUE
Potri.012G044000	-2.5	1.9e-21	TRUE
Potri.012G083700	-2.5	0.012	TRUE
Potri.013G100300	-2.5	9.3e-05	TRUE
Potri.014G014500	-2.5	1.3e-10	TRUE
Potri.014G164000	-2.5	0.00031	TRUE
Potri.015G141300	-2.5	6.2e-13	TRUE
Potri.016G101700	-2.5	2e-12	TRUE
Potri.016G103900	-2.5	0.00016	TRUE
Potri.016G130700	-2.5	0.003	TRUE
Potri.017G029700	-2.5	1.1e-07	TRUE
Potri.017G118200	-2.5	0.0021	TRUE
Potri.018G027200	-2.5	3e-05	TRUE
Potri.018G131600	-2.5	0.0028	TRUE
Potri.T062700	-2.5	0.014	TRUE
Potri.T132100	-2.5	0.0021	TRUE
Potri.T132700	-2.5	0.00033	TRUE
Potri.T169800	-2.5	4.1e-06	TRUE
Potri.001G026200	-2.4	1.3e-30	TRUE
Potri.001G086700	-2.4	1.3e-08	TRUE
Potri.001G154100	-2.4	1.3e-06	TRUE
Potri.001G242600	-2.4	8.6e-06	TRUE
Potri.001G305400	-2.4	0.00014	TRUE
Potri.001G349600	-2.4	1.5e-30	TRUE
Potri.001G393800	-2.4	3.4e-10	TRUE
Potri.001G412400	-2.4	0.0023	TRUE
Potri.001G430600	-2.4	0.038	TRUE
Potri.001G441900	-2.4	0.00044	TRUE
Potri.001G456000	-2.4	2.4e-07	TRUE
Potri.002G089800	-2.4	8.7e-35	TRUE
Potri.002G094800	-2.4	3.1e-07	TRUE
Potri.002G101100	-2.4	9e-15	TRUE
Potri.003G124300	-2.4	0.016	TRUE
Potri.003G156600	-2.4	4.7e-10	TRUE
Potri.004G027200	-2.4	1.8e-12	TRUE
Potri.004G042700	-2.4	3.9e-22	TRUE
Potri.004G202200	-2.4	4.2e-11	TRUE
Potri.005G077900	-2.4	0.048	TRUE
Potri.005G119200	-2.4	8.8e-12	TRUE
Potri.005G220700	-2.4	4e-10	TRUE
Potri.006G058800	-2.4	0.0044	TRUE
Potri.006G101400	-2.4	8e-09	TRUE
Potri.006G219600	-2.4	8.8e-18	TRUE
Potri.007G003800	-2.4	5.3e-06	TRUE
Potri.007G100100	-2.4	6.2e-18	TRUE
Potri.007G123400	-2.4	2.2e-15	TRUE
Potri.008G066000	-2.4	1.2e-06	TRUE
Potri.008G192600	-2.4	1.1e-05	TRUE
Potri.009G094100	-2.4	6.5e-12	TRUE
Potri.009G107400	-2.4	0.017	TRUE
Potri.009G146500	-2.4	2.1e-08	TRUE
Potri.009G167400	-2.4	1.2e-33	TRUE
Potri.010G143600	-2.4	0.00018	TRUE
Potri.011G030100	-2.4	0.048	TRUE
Potri.011G036100	-2.4	0.0026	TRUE
Potri.011G116000	-2.4	0.044	TRUE
Potri.011G151700	-2.4	0.0051	TRUE
Potri.012G048200	-2.4	1.6e-15	TRUE
Potri.012G072100	-2.4	0.027	TRUE
Potri.013G065000	-2.4	4.6e-48	TRUE
Potri.013G099400	-2.4	4.2e-09	TRUE
Potri.014G014000	-2.4	0.00093	TRUE
Potri.014G039500	-2.4	7.7e-07	TRUE
Potri.014G071200	-2.4	1.5e-07	TRUE
Potri.015G046200	-2.4	2.1e-06	TRUE
Potri.015G076000	-2.4	7e-06	TRUE
Potri.016G009300	-2.4	7.3e-05	TRUE
Potri.016G129700	-2.4	7.6e-16	TRUE
Potri.017G050200	-2.4	1.6e-09	TRUE
Potri.018G072100	-2.4	0.041	TRUE
Potri.018G128800	-2.4	0.0031	TRUE
Potri.019G120400	-2.4	0.047	TRUE
Potri.019G120500	-2.4	0.001	TRUE
Potri.T005300	-2.4	0.036	TRUE
Potri.001G051600	-2.3	1.7e-13	TRUE
Potri.001G141900	-2.3	0.041	TRUE
Potri.001G234700	-2.3	1.3e-05	TRUE
Potri.001G235600	-2.3	0.019	TRUE
Potri.001G286800	-2.3	0.046	TRUE
Potri.001G334500	-2.3	1.2e-06	TRUE
Potri.002G009700	-2.3	1.1e-23	TRUE
Potri.002G077300	-2.3	9.4e-07	TRUE
Potri.002G100500	-2.3	1.3e-06	TRUE
Potri.002G108600	-2.3	2.3e-10	TRUE
Potri.002G186400	-2.3	0.033	TRUE
Potri.003G076900	-2.3	0.0011	TRUE
Potri.003G091000	-2.3	3.7e-22	TRUE
Potri.003G152900	-2.3	0.0014	TRUE
Potri.003G176800	-2.3	2e-07	TRUE
Potri.003G187100	-2.3	0.00031	TRUE
Potri.003G193800	-2.3	5.5e-15	TRUE
Potri.005G072000	-2.3	7.7e-24	TRUE
Potri.005G139300	-2.3	0.0081	TRUE
Potri.005G236700	-2.3	4e-13	TRUE
Potri.006G042200	-2.3	7.9e-08	TRUE
Potri.006G053500	-2.3	1e-09	TRUE
Potri.006G058600	-2.3	0.0051	TRUE
Potri.006G086900	-2.3	4.5e-15	TRUE
Potri.006G093500	-2.3	0.0048	TRUE
Potri.006G095100	-2.3	0.015	TRUE
Potri.006G105600	-2.3	0.047	TRUE
Potri.006G139700	-2.3	2.2e-05	TRUE
Potri.006G175500	-2.3	1.8e-14	TRUE
Potri.006G273500	-2.3	0.0072	TRUE
Potri.007G065400	-2.3	8.8e-12	TRUE
Potri.007G070900	-2.3	1.3e-05	TRUE
Potri.007G097400	-2.3	1.5e-06	TRUE
Potri.007G127000	-2.3	1.6e-07	TRUE
Potri.008G043300	-2.3	0.01	TRUE
Potri.008G099200	-2.3	0.035	TRUE
Potri.008G116500	-2.3	1.9e-07	TRUE
Potri.008G197400	-2.3	2.7e-06	TRUE
Potri.009G020700	-2.3	7.3e-15	TRUE
Potri.009G053300	-2.3	7e-45	TRUE
Potri.009G144100	-2.3	2.7e-37	TRUE
Potri.009G155800	-2.3	1.5e-06	TRUE
Potri.010G082000	-2.3	3.3e-08	TRUE
Potri.010G127900	-2.3	3.6e-05	TRUE
Potri.010G142300	-2.3	1.2e-05	TRUE
Potri.010G148300	-2.3	2.3e-14	TRUE
Potri.010G150400	-2.3	0.00011	TRUE
Potri.011G029100	-2.3	0.00061	TRUE
Potri.011G058300	-2.3	6.7e-27	TRUE
Potri.012G022400	-2.3	0.00036	TRUE
Potri.012G133000	-2.3	3.1e-13	TRUE
Potri.013G023200	-2.3	8.4e-24	TRUE
Potri.013G153800	-2.3	2.2e-07	TRUE
Potri.014G017300	-2.3	0.00031	TRUE
Potri.015G030700	-2.3	4.9e-19	TRUE
Potri.015G107600	-2.3	1.4e-05	TRUE
Potri.015G114300	-2.3	0.016	TRUE
Potri.015G124000	-2.3	0.00014	TRUE
Potri.016G016500	-2.3	5.3e-09	TRUE
Potri.016G066700	-2.3	1.8e-32	TRUE
Potri.016G124000	-2.3	4.1e-06	TRUE
Potri.019G090300	-2.3	9.1e-07	TRUE
Potri.T105100	-2.3	0.0052	TRUE
Potri.T124900	-2.3	2.9e-06	TRUE
Potri.001G005400	-2.2	0.0011	TRUE
Potri.001G019100	-2.2	3.9e-29	TRUE
Potri.001G091500	-2.2	2.6e-11	TRUE
Potri.001G158600	-2.2	1.7e-05	TRUE
Potri.001G216100	-2.2	0.019	TRUE
Potri.001G270900	-2.2	0.0084	TRUE
Potri.001G352400	-2.2	1e-12	TRUE
Potri.001G407400	-2.2	0.0013	TRUE
Potri.002G030500	-2.2	1.1e-05	TRUE
Potri.002G080200	-2.2	0.0001	TRUE
Potri.002G112900	-2.2	5.5e-07	TRUE
Potri.002G131800	-2.2	0.0035	TRUE
Potri.003G115200	-2.2	9.3e-09	TRUE
Potri.003G123800	-2.2	0.0056	TRUE
Potri.003G152000	-2.2	2.9e-10	TRUE
Potri.003G176300	-2.2	1.6e-08	TRUE
Potri.003G183200	-2.2	6.3e-19	TRUE
Potri.004G024800	-2.2	0.04	TRUE
Potri.004G055500	-2.2	5.7e-09	TRUE
Potri.004G081300	-2.2	1.5e-12	TRUE
Potri.004G135300	-2.2	3e-20	TRUE
Potri.004G140000	-2.2	1.3e-15	TRUE
Potri.004G212800	-2.2	0.043	TRUE
Potri.005G007200	-2.2	0.011	TRUE
Potri.005G066200	-2.2	1.1e-11	TRUE
Potri.005G157300	-2.2	1.8e-12	TRUE
Potri.005G166100	-2.2	3.2e-18	TRUE
Potri.005G193900	-2.2	2.2e-05	TRUE
Potri.005G219600	-2.2	0.015	TRUE
Potri.006G023600	-2.2	0.015	TRUE
Potri.006G048500	-2.2	7.3e-16	TRUE
Potri.006G139400	-2.2	1.2e-13	TRUE
Potri.008G123100	-2.2	3.5e-16	TRUE
Potri.008G175000	-2.2	0.0014	TRUE
Potri.009G169100	-2.2	0.0078	TRUE
Potri.010G077000	-2.2	0.0043	TRUE
Potri.010G097800	-2.2	2.9e-17	TRUE
Potri.010G127000	-2.2	9.8e-15	TRUE
Potri.010G147700	-2.2	1.5e-18	TRUE
Potri.010G245200	-2.2	6.1e-06	TRUE
Potri.011G121200	-2.2	1e-06	TRUE
Potri.012G047100	-2.2	1.2e-15	TRUE
Potri.012G055600	-2.2	9.4e-09	TRUE
Potri.012G069200	-2.2	9.1e-08	TRUE
Potri.012G094400	-2.2	0.00011	TRUE
Potri.013G054200	-2.2	1.3e-07	TRUE
Potri.013G086100	-2.2	0.0048	TRUE
Potri.014G021500	-2.2	0.0048	TRUE
Potri.014G041000	-2.2	1.2e-13	TRUE
Potri.014G044500	-2.2	6e-06	TRUE
Potri.014G113100	-2.2	0.009	TRUE
Potri.014G117000	-2.2	4.5e-05	TRUE
Potri.014G195200	-2.2	1.6e-06	TRUE
Potri.016G097400	-2.2	4.5e-05	TRUE
Potri.016G104500	-2.2	9.8e-06	TRUE
Potri.016G141900	-2.2	8.2e-16	TRUE
Potri.017G012000	-2.2	0.047	TRUE
Potri.017G017300	-2.2	9.5e-11	TRUE
Potri.017G064300	-2.2	0.034	TRUE
Potri.017G073700	-2.2	3.8e-07	TRUE
Potri.017G095900	-2.2	0.039	TRUE
Potri.017G119200	-2.2	0.011	TRUE
Potri.017G122100	-2.2	0.014	TRUE
Potri.018G100200	-2.2	6.7e-08	TRUE
Potri.019G003800	-2.2	6.8e-09	TRUE
Potri.019G040300	-2.2	5.5e-10	TRUE
Potri.019G059900	-2.2	0.011	TRUE
Potri.019G118100	-2.2	0.0002	TRUE
Potri.T108100	-2.2	0.0048	TRUE
Potri.T170800	-2.2	0.0017	TRUE
Potri.001G038300	-2.1	0.00016	TRUE
Potri.001G103400	-2.1	1.9e-15	TRUE
Potri.001G106800	-2.1	9.4e-05	TRUE
Potri.001G149100	-2.1	1.4e-17	TRUE
Potri.001G226700	-2.1	5.6e-05	TRUE
Potri.001G246300	-2.1	0.00046	TRUE
Potri.001G327800	-2.1	9e-11	TRUE
Potri.001G400400	-2.1	4.2e-06	TRUE
Potri.001G468700	-2.1	2.2e-22	TRUE
Potri.002G017200	-2.1	5e-06	TRUE
Potri.002G021400	-2.1	4.1e-19	TRUE
Potri.002G113000	-2.1	7.4e-29	TRUE
Potri.002G173900	-2.1	2.5e-07	TRUE
Potri.002G224100	-2.1	3.1e-06	TRUE
Potri.002G256900	-2.1	5.9e-09	TRUE
Potri.003G081200	-2.1	2.1e-06	TRUE
Potri.003G132200	-2.1	5.8e-06	TRUE
Potri.003G140100	-2.1	0.0007	TRUE
Potri.003G150100	-2.1	0.02	TRUE
Potri.003G168200	-2.1	0.0034	TRUE
Potri.003G179800	-2.1	0.043	TRUE
Potri.004G050000	-2.1	1.2e-12	TRUE
Potri.004G071000	-2.1	0.0028	TRUE
Potri.005G069500	-2.1	1e-19	TRUE
Potri.005G232300	-2.1	3.6e-09	TRUE
Potri.006G017700	-2.1	0.0014	TRUE
Potri.006G022300	-2.1	1.1e-06	TRUE
Potri.006G024200	-2.1	0.037	TRUE
Potri.006G120100	-2.1	0.033	TRUE
Potri.006G231100	-2.1	1.2e-07	TRUE
Potri.007G146900	-2.1	1.6e-32	TRUE
Potri.008G007000	-2.1	1.3e-06	TRUE
Potri.008G044300	-2.1	0.00023	TRUE
Potri.008G132800	-2.1	0.00017	TRUE
Potri.008G159500	-2.1	8.5e-17	TRUE
Potri.008G175300	-2.1	3.3e-08	TRUE
Potri.008G202200	-2.1	9.9e-14	TRUE
Potri.009G024300	-2.1	0.00026	TRUE
Potri.009G053000	-2.1	1.3e-08	TRUE
Potri.009G096000	-2.1	2e-09	TRUE
Potri.010G107000	-2.1	0.00026	TRUE
Potri.010G131500	-2.1	1.3e-05	TRUE
Potri.011G039100	-2.1	2.1e-06	TRUE
Potri.011G051600	-2.1	0.0066	TRUE
Potri.011G062900	-2.1	4.6e-05	TRUE
Potri.011G078000	-2.1	0.03	TRUE
Potri.011G151600	-2.1	9.2e-17	TRUE
Potri.012G002500	-2.1	6e-25	TRUE
Potri.012G031900	-2.1	0.00091	TRUE
Potri.012G041800	-2.1	9.3e-15	TRUE
Potri.012G102700	-2.1	0.0051	TRUE
Potri.013G102800	-2.1	0.00046	TRUE
Potri.013G145100	-2.1	2.6e-05	TRUE
Potri.014G005300	-2.1	0.03	TRUE
Potri.014G022600	-2.1	2.4e-09	TRUE
Potri.014G022900	-2.1	7.5e-22	TRUE
Potri.014G033400	-2.1	0.0013	TRUE
Potri.014G034300	-2.1	1.2e-07	TRUE
Potri.014G078600	-2.1	4.4e-05	TRUE
Potri.014G087400	-2.1	6.6e-06	TRUE
Potri.014G089700	-2.1	9.4e-09	TRUE
Potri.014G111800	-2.1	0.0013	TRUE
Potri.014G131400	-2.1	0.0016	TRUE
Potri.014G170400	-2.1	3.3e-13	TRUE
Potri.015G081500	-2.1	0.00022	TRUE
Potri.016G068600	-2.1	8.2e-13	TRUE
Potri.018G043000	-2.1	0.047	TRUE
Potri.018G101400	-2.1	1.3e-08	TRUE
Potri.018G114300	-2.1	8e-50	TRUE
Potri.019G017600	-2.1	0.021	TRUE
Potri.019G093800	-2.1	0.039	TRUE
Potri.T093800	-2.1	6.8e-16	TRUE
Potri.T132900	-2.1	5.4e-05	TRUE
Potri.T166400	-2.1	0.012	TRUE
Potri.001G042600	-2	0.0021	TRUE
Potri.001G051500	-2	1.2e-08	TRUE
Potri.001G062500	-2	0.00017	TRUE
Potri.001G070700	-2	1.4e-10	TRUE
Potri.001G076800	-2	0.0086	TRUE
Potri.001G133300	-2	0.00065	TRUE
Potri.001G378300	-2	0.0021	TRUE
Potri.001G390900	-2	0.0028	TRUE
Potri.001G404500	-2	0.0089	TRUE
Potri.002G113800	-2	1e-13	TRUE
Potri.002G118200	-2	0.011	TRUE
Potri.002G122800	-2	4.8e-10	TRUE
Potri.002G150400	-2	0.0012	TRUE
Potri.002G150600	-2	2.4e-07	TRUE
Potri.002G155000	-2	2.5e-32	TRUE
Potri.002G222700	-2	2.4e-18	TRUE
Potri.003G062100	-2	2.2e-05	TRUE
Potri.003G137000	-2	1e-15	TRUE
Potri.004G024600	-2	4e-12	TRUE
Potri.004G025400	-2	1.9e-06	TRUE
Potri.004G039100	-2	3.9e-26	TRUE
Potri.004G051800	-2	0.00025	TRUE
Potri.004G080700	-2	0.0051	TRUE
Potri.004G163300	-2	2e-22	TRUE
Potri.004G217100	-2	4e-05	TRUE
Potri.005G064900	-2	0.024	TRUE
Potri.005G094900	-2	2.1e-24	TRUE
Potri.005G127800	-2	1.1e-10	TRUE
Potri.005G203200	-2	0.0006	TRUE
Potri.006G036400	-2	5.8e-06	TRUE
Potri.006G053200	-2	4.4e-30	TRUE
Potri.006G055400	-2	4.2e-25	TRUE
Potri.006G093200	-2	3.4e-05	TRUE
Potri.006G277400	-2	2.2e-22	TRUE
Potri.007G008900	-2	0.034	TRUE
Potri.007G036500	-2	5.6e-05	TRUE
Potri.007G048700	-2	1.7e-09	TRUE
Potri.007G100700	-2	5.7e-06	TRUE
Potri.008G036000	-2	4.4e-07	TRUE
Potri.008G085000	-2	1.5e-22	TRUE
Potri.008G095600	-2	5.6e-15	TRUE
Potri.008G122100	-2	3.2e-05	TRUE
Potri.008G141600	-2	0.003	TRUE
Potri.008G209300	-2	3.5e-07	TRUE
Potri.010G133600	-2	9.4e-08	TRUE
Potri.010G142900	-2	0.0088	TRUE
Potri.010G189600	-2	3.3e-24	TRUE
Potri.010G217700	-2	0.002	TRUE
Potri.010G220500	-2	4.4e-15	TRUE
Potri.011G076900	-2	1.1e-16	TRUE
Potri.011G113100	-2	0.045	TRUE
Potri.012G023300	-2	1.3e-18	TRUE
Potri.012G054900	-2	5.6e-05	TRUE
Potri.012G059500	-2	2.1e-15	TRUE
Potri.013G083300	-2	8.3e-20	TRUE
Potri.013G089200	-2	0.002	TRUE
Potri.014G099000	-2	1.7e-32	TRUE
Potri.016G065800	-2	9.4e-05	TRUE
Potri.016G100000	-2	0.0015	TRUE
Potri.016G101600	-2	0.0093	TRUE
Potri.017G006000	-2	0.014	TRUE
Potri.017G023400	-2	3.6e-05	TRUE
Potri.017G110700	-2	0.00018	TRUE
Potri.018G038100	-2	3.9e-09	TRUE
Potri.018G078800	-2	5.1e-07	TRUE
Potri.018G095100	-2	0.012	TRUE
Potri.018G122800	-2	2.1e-08	TRUE
Potri.019G003700	-2	2.3e-07	TRUE
Potri.T099800	-2	0.00012	TRUE
Potri.T130800	-2	0.049	TRUE
Potri.T148000	-2	1.7e-06	TRUE
Potri.001G048700	-1.9	1.4e-14	TRUE
Potri.001G058800	-1.9	0.046	TRUE
Potri.001G060700	-1.9	0.0021	TRUE
Potri.001G138000	-1.9	1.2e-07	TRUE
Potri.001G218800	-1.9	0.002	TRUE
Potri.001G226300	-1.9	0.0065	TRUE
Potri.001G295500	-1.9	1.8e-05	TRUE
Potri.001G331500	-1.9	1.7e-16	TRUE
Potri.001G355000	-1.9	3.5e-05	TRUE
Potri.001G356200	-1.9	4.4e-06	TRUE
Potri.001G408400	-1.9	6.8e-07	TRUE
Potri.001G456100	-1.9	0.0039	TRUE
Potri.001G461500	-1.9	0.034	TRUE
Potri.002G016100	-1.9	3.4e-06	TRUE
Potri.002G064000	-1.9	7.7e-18	TRUE
Potri.002G064100	-1.9	0.0051	TRUE
Potri.002G116300	-1.9	5.1e-10	TRUE
Potri.002G132100	-1.9	1.7e-08	TRUE
Potri.003G084000	-1.9	0.0011	TRUE
Potri.003G105500	-1.9	3.3e-09	TRUE
Potri.003G132300	-1.9	0.0016	TRUE
Potri.003G134900	-1.9	2.9e-49	TRUE
Potri.004G026000	-1.9	0.017	TRUE
Potri.004G052400	-1.9	6.9e-12	TRUE
Potri.004G066300	-1.9	8.5e-06	TRUE
Potri.004G073600	-1.9	1.7e-10	TRUE
Potri.004G235600	-1.9	0.0001	TRUE
Potri.005G022500	-1.9	5e-05	TRUE
Potri.005G023900	-1.9	0.038	TRUE
Potri.005G133800	-1.9	1.1e-06	TRUE
Potri.005G186200	-1.9	5.8e-29	TRUE
Potri.005G198500	-1.9	0.04	TRUE
Potri.005G215600	-1.9	1.1e-11	TRUE
Potri.005G216000	-1.9	0.041	TRUE
Potri.006G049200	-1.9	3.9e-10	TRUE
Potri.006G086300	-1.9	5.9e-15	TRUE
Potri.006G103900	-1.9	3.1e-06	TRUE
Potri.006G268700	-1.9	0.014	TRUE
Potri.006G279500	-1.9	0.002	TRUE
Potri.007G008200	-1.9	1.2e-18	TRUE
Potri.007G027000	-1.9	0.0051	TRUE
Potri.007G099400	-1.9	7.4e-11	TRUE
Potri.008G131600	-1.9	2.7e-14	TRUE
Potri.008G172000	-1.9	9.1e-17	TRUE
Potri.009G009200	-1.9	6.5e-13	TRUE
Potri.009G023600	-1.9	5.8e-05	TRUE
Potri.009G071100	-1.9	7.3e-07	TRUE
Potri.009G094500	-1.9	0.013	TRUE
Potri.009G109800	-1.9	1.5e-07	TRUE
Potri.009G119200	-1.9	2.3e-15	TRUE
Potri.009G144200	-1.9	3.1e-06	TRUE
Potri.010G011800	-1.9	0.00023	TRUE
Potri.010G043900	-1.9	4.3e-19	TRUE
Potri.010G052100	-1.9	2e-06	TRUE
Potri.010G157900	-1.9	4.2e-19	TRUE
Potri.010G188600	-1.9	2.6e-16	TRUE
Potri.010G195200	-1.9	4.8e-07	TRUE
Potri.010G198100	-1.9	4.4e-10	TRUE
Potri.010G202400	-1.9	4.8e-22	TRUE
Potri.010G211300	-1.9	7.5e-08	TRUE
Potri.010G225600	-1.9	3.7e-10	TRUE
Potri.011G044100	-1.9	1.2e-20	TRUE
Potri.011G145900	-1.9	9e-19	TRUE
Potri.012G014000	-1.9	5.4e-21	TRUE
Potri.012G057500	-1.9	9e-15	TRUE
Potri.012G089600	-1.9	0.009	TRUE
Potri.013G045400	-1.9	0.00045	TRUE
Potri.014G102300	-1.9	1.9e-42	TRUE
Potri.015G045500	-1.9	0.0026	TRUE
Potri.015G102900	-1.9	0.031	TRUE
Potri.016G127400	-1.9	0.0052	TRUE
Potri.017G041000	-1.9	0.0012	TRUE
Potri.017G084800	-1.9	8.6e-06	TRUE
Potri.017G128800	-1.9	2.6e-18	TRUE
Potri.017G130300	-1.9	3.8e-16	TRUE
Potri.017G138800	-1.9	0.0024	TRUE
Potri.017G147300	-1.9	7.8e-05	TRUE
Potri.018G005500	-1.9	0.0009	TRUE
Potri.018G124100	-1.9	1.4e-11	TRUE
Potri.019G029600	-1.9	1.2e-08	TRUE
Potri.019G117500	-1.9	0.00061	TRUE
Potri.T084200	-1.9	0.017	TRUE
Potri.T130400	-1.9	4.8e-18	TRUE
Potri.001G009000	-1.8	0.012	TRUE
Potri.001G020800	-1.8	2e-10	TRUE
Potri.001G056300	-1.8	0.00041	TRUE
Potri.001G136200	-1.8	3e-12	TRUE
Potri.001G152300	-1.8	0.00033	TRUE
Potri.001G160200	-1.8	0.005	TRUE
Potri.001G235800	-1.8	0.046	TRUE
Potri.001G300900	-1.8	1.4e-11	TRUE
Potri.001G307000	-1.8	0.0044	TRUE
Potri.001G323300	-1.8	0.00066	TRUE
Potri.001G335200	-1.8	0.02	TRUE
Potri.001G335300	-1.8	1.7e-27	TRUE
Potri.001G389400	-1.8	0.0004	TRUE
Potri.001G413700	-1.8	6.5e-15	TRUE
Potri.001G453800	-1.8	0.00025	TRUE
Potri.001G456400	-1.8	4.4e-17	TRUE
Potri.002G057700	-1.8	1.2e-09	TRUE
Potri.002G062700	-1.8	0.00017	TRUE
Potri.002G114500	-1.8	7e-10	TRUE
Potri.002G150500	-1.8	0.044	TRUE
Potri.002G190400	-1.8	1.7e-28	TRUE
Potri.002G228200	-1.8	8.5e-07	TRUE
Potri.002G262400	-1.8	0.012	TRUE
Potri.003G086600	-1.8	0.013	TRUE
Potri.003G100500	-1.8	4.2e-12	TRUE
Potri.003G104500	-1.8	6.4e-06	TRUE
Potri.003G133400	-1.8	9e-06	TRUE
Potri.003G165400	-1.8	4.6e-05	TRUE
Potri.003G187000	-1.8	0.02	TRUE
Potri.003G211900	-1.8	8.7e-05	TRUE
Potri.004G012500	-1.8	0.00063	TRUE
Potri.004G025200	-1.8	3.6e-09	TRUE
Potri.004G033100	-1.8	2.7e-07	TRUE
Potri.004G046000	-1.8	0.047	TRUE
Potri.004G215600	-1.8	2.5e-05	TRUE
Potri.005G070900	-1.8	1.9e-10	TRUE
Potri.005G075300	-1.8	1.3e-07	TRUE
Potri.005G084600	-1.8	3.8e-11	TRUE
Potri.005G087800	-1.8	0.00038	TRUE
Potri.005G098900	-1.8	0.0025	TRUE
Potri.005G177900	-1.8	0.015	TRUE
Potri.005G220900	-1.8	0.00012	TRUE
Potri.005G221500	-1.8	0.041	TRUE
Potri.005G251900	-1.8	5.4e-06	TRUE
Potri.006G093800	-1.8	2.6e-42	TRUE
Potri.008G051200	-1.8	1.4e-08	TRUE
Potri.008G055200	-1.8	0.011	TRUE
Potri.008G158200	-1.8	8.1e-07	TRUE
Potri.008G166000	-1.8	0.00092	TRUE
Potri.009G066200	-1.8	0.00014	TRUE
Potri.009G095300	-1.8	0.002	TRUE
Potri.010G049200	-1.8	0.034	TRUE
Potri.010G187800	-1.8	1.9e-07	TRUE
Potri.010G194100	-1.8	3.9e-30	TRUE
Potri.010G239800	-1.8	0.036	TRUE
Potri.011G062800	-1.8	0.0012	TRUE
Potri.011G095600	-1.8	0.00019	TRUE
Potri.012G017100	-1.8	1e-10	TRUE
Potri.012G041900	-1.8	1.7e-15	TRUE
Potri.012G086300	-1.8	9.5e-08	TRUE
Potri.013G005700	-1.8	0.00017	TRUE
Potri.013G005800	-1.8	3.5e-08	TRUE
Potri.013G012200	-1.8	9.6e-11	TRUE
Potri.013G068500	-1.8	0.00021	TRUE
Potri.013G090200	-1.8	0.00026	TRUE
Potri.014G039800	-1.8	3.3e-11	TRUE
Potri.014G106800	-1.8	4.1e-17	TRUE
Potri.014G143200	-1.8	8.1e-05	TRUE
Potri.014G164100	-1.8	3.6e-05	TRUE
Potri.014G171300	-1.8	8.5e-07	TRUE
Potri.014G177000	-1.8	0.031	TRUE
Potri.015G001500	-1.8	1.1e-08	TRUE
Potri.015G099900	-1.8	0.00039	TRUE
Potri.015G110000	-1.8	2.9e-05	TRUE
Potri.015G143500	-1.8	0.012	TRUE
Potri.016G019700	-1.8	9.5e-16	TRUE
Potri.016G069500	-1.8	0.005	TRUE
Potri.016G076100	-1.8	3.1e-06	TRUE
Potri.016G079600	-1.8	2.5e-05	TRUE
Potri.016G089400	-1.8	4.6e-05	TRUE
Potri.016G131400	-1.8	0.00044	TRUE
Potri.016G135200	-1.8	2.5e-06	TRUE
Potri.016G142300	-1.8	3.4e-20	TRUE
Potri.017G064100	-1.8	0.00013	TRUE
Potri.017G136800	-1.8	0.013	TRUE
Potri.017G146600	-1.8	1.6e-06	TRUE
Potri.018G070800	-1.8	0.0014	TRUE
Potri.018G099800	-1.8	3.3e-15	TRUE
Potri.018G101500	-1.8	1.2e-11	TRUE
Potri.019G081500	-1.8	1.1e-19	TRUE
Potri.T057900	-1.8	0.0049	TRUE
Potri.T083400	-1.8	0.017	TRUE
Potri.T104100	-1.8	0.0007	TRUE
Potri.T117800	-1.8	0.023	TRUE
Potri.T118600	-1.8	1.1e-12	TRUE
Potri.001G031800	-1.7	2.4e-09	TRUE
Potri.001G126700	-1.7	0.00049	TRUE
Potri.001G194500	-1.7	0.022	TRUE
Potri.001G206300	-1.7	0.024	TRUE
Potri.001G326300	-1.7	0.0018	TRUE
Potri.001G409500	-1.7	2.1e-05	TRUE
Potri.001G420200	-1.7	2.7e-14	TRUE
Potri.001G440900	-1.7	3.6e-09	TRUE
Potri.002G011400	-1.7	6.2e-25	TRUE
Potri.002G059100	-1.7	2.5e-05	TRUE
Potri.002G081000	-1.7	3e-13	TRUE
Potri.002G126500	-1.7	5.2e-14	TRUE
Potri.002G172000	-1.7	0.018	TRUE
Potri.002G191000	-1.7	1.2e-05	TRUE
Potri.003G060000	-1.7	0.00019	TRUE
Potri.003G091700	-1.7	0.015	TRUE
Potri.003G096900	-1.7	3.9e-07	TRUE
Potri.003G098300	-1.7	0.034	TRUE
Potri.003G115400	-1.7	9e-21	TRUE
Potri.003G137600	-1.7	0.005	TRUE
Potri.003G144300	-1.7	6.5e-13	TRUE
Potri.003G165200	-1.7	0.0047	TRUE
Potri.004G024500	-1.7	2.6e-06	TRUE
Potri.004G025500	-1.7	0.0008	TRUE
Potri.004G026300	-1.7	0.0016	TRUE
Potri.004G079600	-1.7	0.006	TRUE
Potri.004G116500	-1.7	4.8e-10	TRUE
Potri.004G135400	-1.7	0.00043	TRUE
Potri.004G149600	-1.7	0.012	TRUE
Potri.004G167900	-1.7	1.1e-07	TRUE
Potri.004G216100	-1.7	0.00023	TRUE
Potri.005G024500	-1.7	2.2e-07	TRUE
Potri.005G143900	-1.7	0.0005	TRUE
Potri.005G204600	-1.7	1.7e-13	TRUE
Potri.005G235200	-1.7	9.7e-10	TRUE
Potri.005G248900	-1.7	3e-05	TRUE
Potri.005G250700	-1.7	3.1e-10	TRUE
Potri.006G074800	-1.7	0.00021	TRUE
Potri.006G097500	-1.7	1.7e-12	TRUE
Potri.006G112500	-1.7	3.8e-07	TRUE
Potri.006G187900	-1.7	6.2e-27	TRUE
Potri.006G193000	-1.7	0.00088	TRUE
Potri.006G226900	-1.7	1.5e-10	TRUE
Potri.006G249200	-1.7	2.2e-20	TRUE
Potri.006G255100	-1.7	0.018	TRUE
Potri.006G266600	-1.7	0.0026	TRUE
Potri.007G020500	-1.7	1.2e-07	TRUE
Potri.007G134800	-1.7	7.7e-06	TRUE
Potri.007G143700	-1.7	5.4e-05	TRUE
Potri.008G107000	-1.7	0.013	TRUE
Potri.009G055100	-1.7	9.1e-08	TRUE
Potri.009G066300	-1.7	6.4e-07	TRUE
Potri.009G163700	-1.7	4.2e-33	TRUE
Potri.010G062900	-1.7	2.3e-11	TRUE
Potri.010G072700	-1.7	4e-09	TRUE
Potri.010G085700	-1.7	4e-05	TRUE
Potri.010G176200	-1.7	0.049	TRUE
Potri.010G190600	-1.7	0.0084	TRUE
Potri.010G206500	-1.7	0.04	TRUE
Potri.011G033900	-1.7	0.019	TRUE
Potri.011G044800	-1.7	0.0039	TRUE
Potri.011G093700	-1.7	1.4e-06	TRUE
Potri.011G095500	-1.7	8.3e-05	TRUE
Potri.011G150500	-1.7	0.038	TRUE
Potri.012G131900	-1.7	1.7e-21	TRUE
Potri.013G078500	-1.7	3.7e-06	TRUE
Potri.013G129800	-1.7	0.00069	TRUE
Potri.014G066300	-1.7	0.014	TRUE
Potri.014G094200	-1.7	2.2e-19	TRUE
Potri.016G071600	-1.7	4.5e-09	TRUE
Potri.016G101200	-1.7	0.0037	TRUE
Potri.016G120600	-1.7	3.4e-17	TRUE
Potri.016G136300	-1.7	1.7e-05	TRUE
Potri.017G057800	-1.7	6.1e-11	TRUE
Potri.017G083700	-1.7	0.0001	TRUE
Potri.017G146400	-1.7	3.7e-13	TRUE
Potri.018G006800	-1.7	2.8e-05	TRUE
Potri.018G104900	-1.7	1.6e-24	TRUE
Potri.018G126400	-1.7	3.7e-10	TRUE
Potri.019G052300	-1.7	0.0068	TRUE
Potri.019G087000	-1.7	1.1e-11	TRUE
Potri.019G118400	-1.7	1.4e-06	TRUE
Potri.019G126100	-1.7	0.043	TRUE
Potri.T023600	-1.7	3.7e-06	TRUE
Potri.T128300	-1.7	3e-08	TRUE
Potri.001G037100	-1.6	0.0041	TRUE
Potri.001G067500	-1.6	0.013	TRUE
Potri.001G092900	-1.6	0.0056	TRUE
Potri.001G104400	-1.6	1.4e-24	TRUE
Potri.001G105200	-1.6	2.9e-12	TRUE
Potri.001G133000	-1.6	1.4e-11	TRUE
Potri.001G235200	-1.6	4.7e-07	TRUE
Potri.001G278600	-1.6	2.8e-06	TRUE
Potri.001G300200	-1.6	0.006	TRUE
Potri.001G302400	-1.6	2.6e-06	TRUE
Potri.001G408500	-1.6	1.2e-13	TRUE
Potri.001G421700	-1.6	0.025	TRUE
Potri.001G437400	-1.6	0.00018	TRUE
Potri.001G452200	-1.6	2.9e-14	TRUE
Potri.001G469900	-1.6	5.3e-11	TRUE
Potri.002G063700	-1.6	2.4e-24	TRUE
Potri.002G095400	-1.6	0.0042	TRUE
Potri.002G101500	-1.6	1.3e-05	TRUE
Potri.002G155400	-1.6	0.00049	TRUE
Potri.002G167100	-1.6	8.2e-20	TRUE
Potri.002G167500	-1.6	0.0007	TRUE
Potri.002G172100	-1.6	1e-13	TRUE
Potri.002G176900	-1.6	0.00018	TRUE
Potri.002G187400	-1.6	0.015	TRUE
Potri.002G197900	-1.6	9.7e-11	TRUE
Potri.002G240900	-1.6	1.2e-08	TRUE
Potri.003G084200	-1.6	2.5e-10	TRUE
Potri.003G092700	-1.6	4.6e-10	TRUE
Potri.003G138800	-1.6	0.00091	TRUE
Potri.003G168300	-1.6	9.9e-26	TRUE
Potri.003G169100	-1.6	2.9e-13	TRUE
Potri.003G200500	-1.6	0.023	TRUE
Potri.004G026100	-1.6	1.3e-07	TRUE
Potri.004G034100	-1.6	7e-14	TRUE
Potri.004G041500	-1.6	0.0042	TRUE
Potri.004G088500	-1.6	2.4e-14	TRUE
Potri.004G124200	-1.6	0.0023	TRUE
Potri.004G148300	-1.6	9.9e-09	TRUE
Potri.005G043400	-1.6	1.7e-11	TRUE
Potri.005G057400	-1.6	0.011	TRUE
Potri.005G099100	-1.6	0.0039	TRUE
Potri.005G113700	-1.6	8.2e-05	TRUE
Potri.005G154100	-1.6	0.047	TRUE
Potri.005G179900	-1.6	0.012	TRUE
Potri.005G239100	-1.6	0.0025	TRUE
Potri.005G244500	-1.6	0.0001	TRUE
Potri.005G251700	-1.6	2.9e-13	TRUE
Potri.005G259100	-1.6	0.00026	TRUE
Potri.006G039500	-1.6	4.3e-12	TRUE
Potri.006G052300	-1.6	4.3e-11	TRUE
Potri.006G107600	-1.6	0.00014	TRUE
Potri.006G144500	-1.6	0.00081	TRUE
Potri.006G213500	-1.6	1.3e-12	TRUE
Potri.006G214700	-1.6	0.0034	TRUE
Potri.006G223700	-1.6	8.8e-06	TRUE
Potri.006G230200	-1.6	4.4e-10	TRUE
Potri.007G039400	-1.6	4.8e-09	TRUE
Potri.007G042400	-1.6	2.1e-12	TRUE
Potri.008G057600	-1.6	0.00081	TRUE
Potri.008G065600	-1.6	2.7e-09	TRUE
Potri.008G077900	-1.6	0.0022	TRUE
Potri.008G109200	-1.6	8.1e-16	TRUE
Potri.008G150600	-1.6	0.00099	TRUE
Potri.008G156800	-1.6	6.9e-05	TRUE
Potri.009G123700	-1.6	1.2e-33	TRUE
Potri.009G127800	-1.6	0.00022	TRUE
Potri.009G164000	-1.6	2.9e-07	TRUE
Potri.010G053400	-1.6	6.5e-10	TRUE
Potri.010G060900	-1.6	1.8e-05	TRUE
Potri.010G085400	-1.6	0.029	TRUE
Potri.010G090700	-1.6	0.0056	TRUE
Potri.010G096800	-1.6	4.7e-06	TRUE
Potri.010G100600	-1.6	3.7e-06	TRUE
Potri.010G108600	-1.6	2.7e-12	TRUE
Potri.010G166200	-1.6	2.9e-05	TRUE
Potri.010G199600	-1.6	3.8e-13	TRUE
Potri.010G240800	-1.6	5.6e-11	TRUE
Potri.011G035200	-1.6	0.002	TRUE
Potri.011G037100	-1.6	4.5e-05	TRUE
Potri.011G044700	-1.6	7e-08	TRUE
Potri.011G058900	-1.6	0.0017	TRUE
Potri.012G014800	-1.6	0.015	TRUE
Potri.012G038400	-1.6	2.7e-09	TRUE
Potri.012G087700	-1.6	0.02	TRUE
Potri.012G112200	-1.6	2.9e-08	TRUE
Potri.012G140700	-1.6	7.4e-07	TRUE
Potri.013G000200	-1.6	5.3e-13	TRUE
Potri.013G010700	-1.6	2.3e-26	TRUE
Potri.013G080100	-1.6	0.0012	TRUE
Potri.013G109800	-1.6	1.3e-06	TRUE
Potri.013G111900	-1.6	2e-08	TRUE
Potri.013G116400	-1.6	1.4e-20	TRUE
Potri.014G113900	-1.6	3.3e-07	TRUE
Potri.014G115500	-1.6	2.1e-23	TRUE
Potri.015G001300	-1.6	5.2e-05	TRUE
Potri.015G020000	-1.6	6.5e-09	TRUE
Potri.015G108600	-1.6	6.2e-10	TRUE
Potri.016G001500	-1.6	0.012	TRUE
Potri.016G037100	-1.6	0.03	TRUE
Potri.016G037200	-1.6	1.3e-05	TRUE
Potri.016G068500	-1.6	0.001	TRUE
Potri.016G075800	-1.6	7.6e-07	TRUE
Potri.016G099300	-1.6	2.1e-34	TRUE
Potri.016G105000	-1.6	4.9e-17	TRUE
Potri.016G105900	-1.6	8.7e-26	TRUE
Potri.016G109500	-1.6	3.4e-20	TRUE
Potri.017G013300	-1.6	1.5e-15	TRUE
Potri.017G050300	-1.6	9.3e-09	TRUE
Potri.017G083300	-1.6	0.038	TRUE
Potri.017G089400	-1.6	0.024	TRUE
Potri.017G117400	-1.6	0.018	TRUE
Potri.017G120500	-1.6	0.0077	TRUE
Potri.017G145700	-1.6	9.6e-13	TRUE
Potri.018G006300	-1.6	0.00064	TRUE
Potri.018G019700	-1.6	0.025	TRUE
Potri.018G025100	-1.6	2e-06	TRUE
Potri.018G091000	-1.6	0.016	TRUE
Potri.018G101600	-1.6	3.9e-05	TRUE
Potri.018G132800	-1.6	0.028	TRUE
Potri.019G018500	-1.6	1.6e-16	TRUE
Potri.019G039600	-1.6	5.2e-08	TRUE
Potri.019G056400	-1.6	3.9e-09	TRUE
Potri.019G057800	-1.6	1.6e-08	TRUE
Potri.019G083800	-1.6	0.00013	TRUE
Potri.019G102900	-1.6	0.018	TRUE
Potri.019G114800	-1.6	0.0011	TRUE
Potri.T057500	-1.6	2.4e-05	TRUE
Potri.T113200	-1.6	0.013	TRUE
Potri.T175100	-1.6	0.02	TRUE
Potri.001G010600	-1.5	0.0083	TRUE
Potri.001G027100	-1.5	0.049	TRUE
Potri.001G037000	-1.5	1.9e-05	TRUE
Potri.001G070800	-1.5	3.2e-14	TRUE
Potri.001G103700	-1.5	7.7e-09	TRUE
Potri.001G105900	-1.5	2e-16	TRUE
Potri.001G156200	-1.5	0.00012	TRUE
Potri.001G167700	-1.5	4.5e-05	TRUE
Potri.001G191800	-1.5	0.0018	TRUE
Potri.001G310500	-1.5	7.6e-16	TRUE
Potri.001G317100	-1.5	0.00027	TRUE
Potri.001G373900	-1.5	2e-08	TRUE
Potri.001G415200	-1.5	0.00075	TRUE
Potri.001G442300	-1.5	0.0083	TRUE
Potri.001G448500	-1.5	4.3e-05	TRUE
Potri.001G470000	-1.5	1.5e-10	TRUE
Potri.002G003800	-1.5	9.6e-06	TRUE
Potri.002G033600	-1.5	2.8e-05	TRUE
Potri.002G042200	-1.5	0.00029	TRUE
Potri.002G058400	-1.5	0.00061	TRUE
Potri.002G105000	-1.5	2.5e-08	TRUE
Potri.002G105900	-1.5	7.8e-13	TRUE
Potri.002G119300	-1.5	0.00051	TRUE
Potri.002G124000	-1.5	1.9e-11	TRUE
Potri.002G129400	-1.5	0.00032	TRUE
Potri.002G143800	-1.5	5.5e-05	TRUE
Potri.002G184200	-1.5	4.8e-11	TRUE
Potri.002G185300	-1.5	1.7e-07	TRUE
Potri.002G255000	-1.5	0.0017	TRUE
Potri.003G076300	-1.5	0.0013	TRUE
Potri.003G088400	-1.5	9.5e-07	TRUE
Potri.003G147800	-1.5	0.00086	TRUE
Potri.003G159600	-1.5	0.0036	TRUE
Potri.004G012700	-1.5	0.0015	TRUE
Potri.004G036200	-1.5	1.2e-08	TRUE
Potri.004G067400	-1.5	4e-18	TRUE
Potri.004G220400	-1.5	0.04	TRUE
Potri.004G232500	-1.5	4.9e-09	TRUE
Potri.005G026700	-1.5	0.01	TRUE
Potri.005G040900	-1.5	0.015	TRUE
Potri.005G052800	-1.5	0.032	TRUE
Potri.005G078000	-1.5	0.022	TRUE
Potri.005G101600	-1.5	2.4e-12	TRUE
Potri.005G113900	-1.5	2.9e-07	TRUE
Potri.005G169100	-1.5	7.6e-09	TRUE
Potri.005G179100	-1.5	1.2e-10	TRUE
Potri.005G180200	-1.5	1.4e-12	TRUE
Potri.005G213500	-1.5	4.4e-06	TRUE
Potri.005G251300	-1.5	5e-06	TRUE
Potri.006G007200	-1.5	1.3e-13	TRUE
Potri.006G011600	-1.5	1.9e-07	TRUE
Potri.006G023700	-1.5	0.00087	TRUE
Potri.006G052900	-1.5	6.8e-14	TRUE
Potri.006G074900	-1.5	5.5e-07	TRUE
Potri.006G148800	-1.5	0.048	TRUE
Potri.006G214500	-1.5	0.0001	TRUE
Potri.006G215000	-1.5	4.7e-08	TRUE
Potri.006G235500	-1.5	3.5e-05	TRUE
Potri.006G268200	-1.5	0.034	TRUE
Potri.007G044000	-1.5	0.027	TRUE
Potri.007G079800	-1.5	0.0027	TRUE
Potri.007G089000	-1.5	0.001	TRUE
Potri.007G111500	-1.5	0.027	TRUE
Potri.007G115500	-1.5	0.028	TRUE
Potri.007G121100	-1.5	0.00046	TRUE
Potri.007G121200	-1.5	0.045	TRUE
Potri.007G127300	-1.5	2.2e-19	TRUE
Potri.008G029700	-1.5	5.6e-05	TRUE
Potri.008G035900	-1.5	0.0039	TRUE
Potri.008G081100	-1.5	1.7e-10	TRUE
Potri.008G102800	-1.5	1.8e-13	TRUE
Potri.008G159000	-1.5	0.00016	TRUE
Potri.009G019200	-1.5	4e-06	TRUE
Potri.009G076100	-1.5	8.6e-10	TRUE
Potri.010G046900	-1.5	2.4e-12	TRUE
Potri.010G063400	-1.5	0.011	TRUE
Potri.010G079500	-1.5	0.00011	TRUE
Potri.010G082700	-1.5	0.0013	TRUE
Potri.010G109100	-1.5	2.9e-08	TRUE
Potri.010G129800	-1.5	6.5e-08	TRUE
Potri.011G003300	-1.5	3e-21	TRUE
Potri.011G035900	-1.5	0.0016	TRUE
Potri.011G036400	-1.5	0.015	TRUE
Potri.011G036500	-1.5	0.0022	TRUE
Potri.011G065900	-1.5	0.021	TRUE
Potri.011G126300	-1.5	1.7e-07	TRUE
Potri.013G043200	-1.5	0.0038	TRUE
Potri.013G085700	-1.5	7.5e-23	TRUE
Potri.013G103000	-1.5	0.0034	TRUE
Potri.013G153400	-1.5	7.6e-20	TRUE
Potri.014G019200	-1.5	0.00058	TRUE
Potri.014G025000	-1.5	1.2e-11	TRUE
Potri.014G041500	-1.5	0.0026	TRUE
Potri.014G090300	-1.5	1.3e-09	TRUE
Potri.014G101900	-1.5	2.2e-15	TRUE
Potri.014G116000	-1.5	1.2e-05	TRUE
Potri.014G122100	-1.5	0.041	TRUE
Potri.014G170800	-1.5	0.00059	TRUE
Potri.015G022100	-1.5	1.2e-10	TRUE
Potri.015G030600	-1.5	9.2e-23	TRUE
Potri.015G041100	-1.5	0.013	TRUE
Potri.015G089800	-1.5	0.044	TRUE
Potri.015G126900	-1.5	7e-06	TRUE
Potri.016G001600	-1.5	0.00022	TRUE
Potri.016G048000	-1.5	0.04	TRUE
Potri.016G056500	-1.5	6e-07	TRUE
Potri.016G091100	-1.5	4.4e-07	TRUE
Potri.016G103100	-1.5	8.2e-12	TRUE
Potri.016G109700	-1.5	1e-17	TRUE
Potri.016G111000	-1.5	0.00015	TRUE
Potri.016G142000	-1.5	5.6e-08	TRUE
Potri.017G106400	-1.5	3.4e-22	TRUE
Potri.017G108900	-1.5	1.3e-09	TRUE
Potri.017G126100	-1.5	0.036	TRUE
Potri.017G126200	-1.5	1.1e-08	TRUE
Potri.017G147400	-1.5	6.4e-06	TRUE
Potri.018G013900	-1.5	1.4e-23	TRUE
Potri.018G100300	-1.5	0.00022	TRUE
Potri.018G121100	-1.5	0.036	TRUE
Potri.018G152200	-1.5	7.4e-06	TRUE
Potri.019G083600	-1.5	0.0094	TRUE
Potri.019G097300	-1.5	0.00021	TRUE
Potri.019G125600	-1.5	0.015	TRUE
Potri.019G130500	-1.5	0.011	TRUE
Potri.T035000	-1.5	1.1e-06	TRUE
Potri.T044100	-1.5	1.9e-05	TRUE
Potri.T168500	-1.5	0.022	TRUE
Potri.001G042700	-1.4	0.022	TRUE
Potri.001G113100	-1.4	0.00013	TRUE
Potri.001G121900	-1.4	0.047	TRUE
Potri.001G132800	-1.4	5.1e-29	TRUE
Potri.001G142700	-1.4	0.033	TRUE
Potri.001G185200	-1.4	0.0057	TRUE
Potri.001G193200	-1.4	0.0007	TRUE
Potri.001G239500	-1.4	0.0011	TRUE
Potri.001G247200	-1.4	0.013	TRUE
Potri.001G267500	-1.4	2e-29	TRUE
Potri.001G364000	-1.4	5.2e-05	TRUE
Potri.001G378400	-1.4	1.4e-07	TRUE
Potri.001G384000	-1.4	4.1e-11	TRUE
Potri.001G411400	-1.4	0.0096	TRUE
Potri.001G441800	-1.4	0.0083	TRUE
Potri.001G455700	-1.4	5.7e-06	TRUE
Potri.002G002200	-1.4	4.5e-14	TRUE
Potri.002G019700	-1.4	4.4e-07	TRUE
Potri.002G020500	-1.4	0.0072	TRUE
Potri.002G038500	-1.4	0.013	TRUE
Potri.002G042100	-1.4	5.5e-06	TRUE
Potri.002G062200	-1.4	1.4e-07	TRUE
Potri.002G074700	-1.4	4.5e-09	TRUE
Potri.002G087700	-1.4	4.3e-19	TRUE
Potri.002G099700	-1.4	3.2e-09	TRUE
Potri.002G102400	-1.4	0.023	TRUE
Potri.002G125400	-1.4	2.1e-17	TRUE
Potri.002G134600	-1.4	4.6e-22	TRUE
Potri.002G140800	-1.4	0.00062	TRUE
Potri.002G177500	-1.4	1.4e-05	TRUE
Potri.002G178000	-1.4	1.2e-05	TRUE
Potri.003G038200	-1.4	0.001	TRUE
Potri.003G070900	-1.4	0.00052	TRUE
Potri.003G073200	-1.4	0.0032	TRUE
Potri.003G119100	-1.4	0.009	TRUE
Potri.003G120500	-1.4	1.5e-18	TRUE
Potri.003G141900	-1.4	2.8e-36	TRUE
Potri.003G161100	-1.4	0.0063	TRUE
Potri.003G167400	-1.4	1.6e-09	TRUE
Potri.003G215200	-1.4	4.2e-06	TRUE
Potri.003G218800	-1.4	1.4e-08	TRUE
Potri.004G117800	-1.4	2.6e-06	TRUE
Potri.004G179300	-1.4	0.034	TRUE
Potri.004G181100	-1.4	0.018	TRUE
Potri.004G213500	-1.4	0.00062	TRUE
Potri.004G235400	-1.4	2.1e-09	TRUE
Potri.005G020200	-1.4	3.6e-05	TRUE
Potri.005G025200	-1.4	0.012	TRUE
Potri.005G030700	-1.4	6e-05	TRUE
Potri.005G045100	-1.4	0.00018	TRUE
Potri.005G078700	-1.4	0.0093	TRUE
Potri.005G079400	-1.4	0.016	TRUE
Potri.005G084100	-1.4	0.0042	TRUE
Potri.005G099300	-1.4	0.0017	TRUE
Potri.005G103200	-1.4	0.001	TRUE
Potri.005G116900	-1.4	1.6e-07	TRUE
Potri.005G128200	-1.4	0.00032	TRUE
Potri.005G133700	-1.4	0.0015	TRUE
Potri.005G146700	-1.4	1.1e-06	TRUE
Potri.005G167400	-1.4	7.7e-07	TRUE
Potri.005G184100	-1.4	0.00058	TRUE
Potri.005G186500	-1.4	1.7e-16	TRUE
Potri.005G193800	-1.4	0.04	TRUE
Potri.005G211800	-1.4	0.022	TRUE
Potri.005G216300	-1.4	5.7e-07	TRUE
Potri.006G054900	-1.4	0.029	TRUE
Potri.006G062900	-1.4	0.0097	TRUE
Potri.006G094000	-1.4	7.7e-08	TRUE
Potri.006G144200	-1.4	0.038	TRUE
Potri.006G232100	-1.4	3.5e-14	TRUE
Potri.007G020900	-1.4	3e-06	TRUE
Potri.007G035000	-1.4	0.00016	TRUE
Potri.007G043800	-1.4	1.6e-12	TRUE
Potri.007G047700	-1.4	0.00081	TRUE
Potri.007G088300	-1.4	3.9e-06	TRUE
Potri.007G140900	-1.4	0.002	TRUE
Potri.008G048200	-1.4	2.3e-12	TRUE
Potri.008G060200	-1.4	0.014	TRUE
Potri.008G062300	-1.4	0.00043	TRUE
Potri.008G080800	-1.4	4.6e-22	TRUE
Potri.008G119300	-1.4	0.0025	TRUE
Potri.008G130400	-1.4	9.8e-08	TRUE
Potri.008G144800	-1.4	3.2e-11	TRUE
Potri.008G151700	-1.4	0.0005	TRUE
Potri.008G154400	-1.4	0.00032	TRUE
Potri.008G156600	-1.4	3.8e-05	TRUE
Potri.008G159300	-1.4	8.2e-07	TRUE
Potri.009G039200	-1.4	5.5e-06	TRUE
Potri.009G051500	-1.4	2.4e-16	TRUE
Potri.009G055700	-1.4	7.9e-06	TRUE
Potri.009G105400	-1.4	4.9e-05	TRUE
Potri.009G123400	-1.4	7.9e-20	TRUE
Potri.009G147700	-1.4	0.0037	TRUE
Potri.009G151600	-1.4	4.6e-12	TRUE
Potri.010G006600	-1.4	7e-14	TRUE
Potri.010G035100	-1.4	1.1e-19	TRUE
Potri.010G063500	-1.4	6.2e-19	TRUE
Potri.010G130900	-1.4	0.032	TRUE
Potri.010G146500	-1.4	0.00085	TRUE
Potri.010G184800	-1.4	1.8e-06	TRUE
Potri.010G191600	-1.4	1.6e-05	TRUE
Potri.010G201400	-1.4	0.00011	TRUE
Potri.011G002800	-1.4	0.0065	TRUE
Potri.011G034500	-1.4	0.018	TRUE
Potri.011G035100	-1.4	0.00035	TRUE
Potri.011G043300	-1.4	8.3e-11	TRUE
Potri.011G049600	-1.4	2.5e-07	TRUE
Potri.011G131100	-1.4	3.9e-06	TRUE
Potri.012G038800	-1.4	1.8e-06	TRUE
Potri.013G033000	-1.4	7e-05	TRUE
Potri.013G102700	-1.4	3.2e-05	TRUE
Potri.014G020500	-1.4	0.0012	TRUE
Potri.014G054800	-1.4	0.0013	TRUE
Potri.014G097900	-1.4	0.00019	TRUE
Potri.014G106300	-1.4	0.044	TRUE
Potri.014G134600	-1.4	0.0005	TRUE
Potri.014G145100	-1.4	9.8e-06	TRUE
Potri.014G152800	-1.4	0.043	TRUE
Potri.016G013000	-1.4	9.4e-09	TRUE
Potri.016G017100	-1.4	1.9e-09	TRUE
Potri.016G054200	-1.4	5.8e-09	TRUE
Potri.016G111800	-1.4	3.2e-12	TRUE
Potri.016G116400	-1.4	1.7e-20	TRUE
Potri.016G134100	-1.4	0.014	TRUE
Potri.017G004900	-1.4	0.0016	TRUE
Potri.017G006900	-1.4	0.0049	TRUE
Potri.017G013400	-1.4	0.03	TRUE
Potri.017G106900	-1.4	7.4e-12	TRUE
Potri.017G147500	-1.4	0.0029	TRUE
Potri.018G019800	-1.4	3e-05	TRUE
Potri.018G026600	-1.4	5.1e-14	TRUE
Potri.018G032200	-1.4	7.4e-18	TRUE
Potri.018G054600	-1.4	0.0072	TRUE
Potri.018G097900	-1.4	0.0098	TRUE
Potri.018G118300	-1.4	0.00016	TRUE
Potri.018G119600	-1.4	0.00053	TRUE
Potri.019G131800	-1.4	2.2e-05	TRUE
Potri.T074900	-1.4	0.01	TRUE
Potri.T156600	-1.4	0.027	TRUE
Potri.T160900	-1.4	0.012	TRUE
Potri.T181600	-1.4	1.8e-05	TRUE
Potri.001G006700	-1.3	0.00044	TRUE
Potri.001G007000	-1.3	3.6e-05	TRUE
Potri.001G019400	-1.3	1.2e-07	TRUE
Potri.001G041800	-1.3	2.5e-06	TRUE
Potri.001G044400	-1.3	4.8e-05	TRUE
Potri.001G048800	-1.3	0.00085	TRUE
Potri.001G056600	-1.3	4.5e-05	TRUE
Potri.001G082200	-1.3	0.016	TRUE
Potri.001G096400	-1.3	3.6e-09	TRUE
Potri.001G097700	-1.3	1.8e-25	TRUE
Potri.001G098100	-1.3	0.00019	TRUE
Potri.001G175200	-1.3	1.4e-08	TRUE
Potri.001G258100	-1.3	2.4e-06	TRUE
Potri.001G270400	-1.3	0.013	TRUE
Potri.001G315000	-1.3	6.8e-08	TRUE
Potri.001G318900	-1.3	0.0017	TRUE
Potri.001G339500	-1.3	0.015	TRUE
Potri.001G395100	-1.3	0.0012	TRUE
Potri.001G409400	-1.3	0.014	TRUE
Potri.001G442600	-1.3	2.8e-11	TRUE
Potri.002G089600	-1.3	2.4e-05	TRUE
Potri.002G104400	-1.3	2.3e-12	TRUE
Potri.002G106300	-1.3	2.6e-14	TRUE
Potri.002G177300	-1.3	0.042	TRUE
Potri.002G180800	-1.3	1.1e-07	TRUE
Potri.002G241700	-1.3	9.7e-09	TRUE
Potri.003G092200	-1.3	2.5e-15	TRUE
Potri.003G095700	-1.3	3.2e-11	TRUE
Potri.003G112400	-1.3	1.2e-09	TRUE
Potri.003G121000	-1.3	5.6e-12	TRUE
[truncated: 10,648 more rows]

## Sheet: Sig_DEG_root
Gene_ID	Log2FC	P-adj	Sig
Potri.008G223500	-15	1.2e-05	TRUE
Potri.003G169500	-10	1.5e-05	TRUE
Potri.008G033500	-10	0.00074	TRUE
Potri.009G035700	-10	3.4e-05	TRUE
Potri.009G095600	-10	0.00015	TRUE
Potri.010G150400	-10	2.3e-23	TRUE
Potri.T092600	-10	0.023	TRUE
Potri.009G035600	-9.7	0.00013	TRUE
Potri.001G060900	-9.5	3.4e-20	TRUE
Potri.007G118600	-9.5	9.5e-16	TRUE
Potri.016G064000	-9.2	0.0025	TRUE
Potri.004G058200	-8.6	0.0014	TRUE
Potri.002G083700	-8.5	4.9e-14	TRUE
Potri.019G017500	-8.5	0.0013	TRUE
Potri.001G173200	-8.4	3.2e-08	TRUE
Potri.005G233300	-8.4	3.1e-36	TRUE
Potri.008G037600	-8.3	5.9e-06	TRUE
Potri.007G118500	-8.2	0.0021	TRUE
Potri.009G035500	-8.2	8.2e-10	TRUE
Potri.001G242600	-7.9	8e-47	TRUE
Potri.013G136300	-7.9	0.0018	TRUE
Potri.007G049400	-7.8	1.4e-09	TRUE
Potri.013G157200	-7.8	0.0059	TRUE
Potri.001G172900	-7.6	0.0037	TRUE
Potri.011G141000	-7.6	0.028	TRUE
Potri.014G047900	-7.6	0.02	TRUE
Potri.002G083800	-7.5	7e-16	TRUE
Potri.018G082700	-7.5	0.0029	TRUE
Potri.016G037000	-7.4	7.7e-05	TRUE
Potri.018G001200	-7.4	0.01	TRUE
Potri.001G376200	-7.3	6.7e-12	TRUE
Potri.001G408100	-7.3	0.0027	TRUE
Potri.003G032700	-7.3	0.004	TRUE
Potri.011G126100	-7.3	0.013	TRUE
Potri.014G030100	-7.3	0.0026	TRUE
Potri.001G173000	-7.2	5.2e-25	TRUE
Potri.018G134300	-7.2	0.013	TRUE
Potri.002G152600	-7.1	3.7e-19	TRUE
Potri.018G128800	-7.1	1.2e-25	TRUE
Potri.001G113900	-7	1.1e-35	TRUE
Potri.001G255100	-7	5.4e-13	TRUE
Potri.019G093100	-7	0.0066	TRUE
Potri.001G338500	-6.9	0.0079	TRUE
Potri.009G152900	-6.9	0.0073	TRUE
Potri.002G029400	-6.8	0.00011	TRUE
Potri.010G224600	-6.8	0.026	TRUE
Potri.013G090200	-6.8	1.2e-48	TRUE
Potri.002G033200	-6.7	0.021	TRUE
Potri.007G109200	-6.7	4.2e-26	TRUE
Potri.009G097500	-6.7	0.03	TRUE
Potri.013G143700	-6.7	0.0078	TRUE
Potri.014G020800	-6.7	0.014	TRUE
Potri.017G000600	-6.7	0.014	TRUE
Potri.017G141700	-6.7	0.0059	TRUE
Potri.019G126700	-6.7	0.017	TRUE
Potri.002G094300	-6.6	0.0086	TRUE
Potri.004G107600	-6.6	0.019	TRUE
Potri.008G084900	-6.6	0.01	TRUE
Potri.015G099200	-6.6	4.7e-16	TRUE
Potri.016G029900	-6.6	0.022	TRUE
Potri.017G120600	-6.6	0.0014	TRUE
Potri.001G412700	-6.5	0.026	TRUE
Potri.005G106100	-6.5	0.0034	TRUE
Potri.005G200600	-6.5	3.5e-14	TRUE
Potri.005G224700	-6.5	0.041	TRUE
Potri.008G004000	-6.5	0.012	TRUE
Potri.010G021800	-6.5	0.0083	TRUE
Potri.002G064200	-6.4	0.042	TRUE
Potri.007G027800	-6.4	0.03	TRUE
Potri.010G047100	-6.4	7.5e-07	TRUE
Potri.010G176200	-6.4	4.4e-11	TRUE
Potri.013G048400	-6.4	0.014	TRUE
Potri.013G160400	-6.4	0.00056	TRUE
Potri.015G060600	-6.4	5.1e-26	TRUE
Potri.018G062600	-6.4	4.3e-13	TRUE
Potri.001G143700	-6.3	0.027	TRUE
Potri.016G046400	-6.3	3.7e-28	TRUE
Potri.T072300	-6.3	0.013	TRUE
Potri.T159300	-6.3	0.025	TRUE
Potri.002G026900	-6.2	0.039	TRUE
Potri.002G256800	-6.2	1.1e-05	TRUE
Potri.004G101900	-6.2	0.034	TRUE
Potri.005G025500	-6.2	0.045	TRUE
Potri.007G114300	-6.2	0.0059	TRUE
Potri.009G038000	-6.2	0.044	TRUE
Potri.009G117400	-6.2	0.04	TRUE
Potri.012G141300	-6.2	1.4e-27	TRUE
Potri.016G123700	-6.2	0.012	TRUE
Potri.016G125700	-6.2	0.022	TRUE
Potri.017G091400	-6.2	0.022	TRUE
Potri.002G121300	-6.1	0.017	TRUE
Potri.003G189800	-6.1	0.019	TRUE
Potri.003G202200	-6.1	3.2e-08	TRUE
Potri.004G055900	-6.1	1.4e-11	TRUE
Potri.006G268300	-6.1	0.02	TRUE
Potri.008G127100	-6.1	0.019	TRUE
Potri.009G091700	-6.1	0.031	TRUE
Potri.009G120100	-6.1	0.0017	TRUE
Potri.010G116100	-6.1	0.037	TRUE
Potri.013G101100	-6.1	4.2e-24	TRUE
Potri.016G061200	-6.1	0.036	TRUE
Potri.017G113700	-6.1	0.044	TRUE
Potri.019G130100	-6.1	0.015	TRUE
Potri.001G031600	-6	0.031	TRUE
Potri.002G173500	-6	0.035	TRUE
Potri.014G071500	-6	0.043	TRUE
Potri.015G018800	-6	2.6e-32	TRUE
Potri.015G109100	-6	9e-07	TRUE
Potri.016G129400	-6	6.3e-05	TRUE
Potri.T111300	-6	1.7e-27	TRUE
Potri.T155500	-6	0.021	TRUE
Potri.007G101000	-5.9	0.027	TRUE
Potri.009G155100	-5.9	0.032	TRUE
Potri.016G124000	-5.9	2.3e-39	TRUE
Potri.002G065700	-5.8	1.4e-08	TRUE
Potri.010G248600	-5.8	0.029	TRUE
Potri.012G006600	-5.8	0.048	TRUE
Potri.014G082200	-5.8	0.026	TRUE
Potri.003G167200	-5.7	0.031	TRUE
Potri.004G164700	-5.7	0.029	TRUE
Potri.004G180000	-5.7	0.0002	TRUE
Potri.010G088500	-5.7	0.044	TRUE
Potri.010G213100	-5.7	0.043	TRUE
Potri.001G072900	-5.6	0.049	TRUE
Potri.002G117700	-5.6	7.1e-05	TRUE
Potri.004G158500	-5.6	1.1e-11	TRUE
Potri.006G122400	-5.6	7.5e-14	TRUE
Potri.012G082800	-5.6	1.9e-22	TRUE
Potri.012G141800	-5.6	1.4e-07	TRUE
Potri.016G121000	-5.6	1.5e-08	TRUE
Potri.016G129800	-5.6	0.0016	TRUE
Potri.017G145600	-5.6	7.3e-08	TRUE
Potri.T092500	-5.6	0.026	TRUE
Potri.005G048000	-5.5	0.0002	TRUE
Potri.005G183100	-5.5	0.045	TRUE
Potri.008G164300	-5.5	1.9e-16	TRUE
Potri.010G193700	-5.5	0.0075	TRUE
Potri.011G075800	-5.5	0.035	TRUE
Potri.011G132100	-5.5	0.049	TRUE
Potri.012G023700	-5.5	1.3e-16	TRUE
Potri.014G022200	-5.5	2.6e-06	TRUE
Potri.016G040700	-5.5	0.045	TRUE
Potri.018G100800	-5.5	0.041	TRUE
Potri.003G059700	-5.4	9.8e-19	TRUE
Potri.005G145200	-5.4	0.01	TRUE
Potri.009G055500	-5.4	0.0071	TRUE
Potri.010G072300	-5.4	5.1e-14	TRUE
Potri.011G112400	-5.4	1.5e-59	TRUE
Potri.003G054600	-5.3	2.1e-06	TRUE
Potri.004G107500	-5.3	0.01	TRUE
Potri.005G058800	-5.3	2e-21	TRUE
Potri.006G024200	-5.3	1.4e-08	TRUE
Potri.006G048100	-5.3	2.7e-07	TRUE
Potri.009G118700	-5.3	1.7e-09	TRUE
Potri.009G140400	-5.3	5.4e-07	TRUE
Potri.012G101000	-5.3	1.9e-08	TRUE
Potri.013G041900	-5.3	8.7e-08	TRUE
Potri.013G145100	-5.3	7.3e-10	TRUE
Potri.018G135200	-5.3	0.011	TRUE
Potri.002G163700	-5.2	9.8e-12	TRUE
Potri.004G017600	-5.2	1.3e-11	TRUE
Potri.005G236100	-5.2	0.00015	TRUE
Potri.006G037800	-5.2	6.6e-24	TRUE
Potri.006G138900	-5.2	1.6e-46	TRUE
Potri.008G134100	-5.2	2.1e-41	TRUE
Potri.009G034000	-5.2	2.9e-21	TRUE
Potri.009G133500	-5.2	3.7e-42	TRUE
Potri.010G002600	-5.2	4.2e-31	TRUE
Potri.012G050200	-5.2	8.2e-05	TRUE
Potri.013G074000	-5.2	0.011	TRUE
Potri.T139100	-5.2	0.015	TRUE
Potri.003G083200	-5.1	9.1e-20	TRUE
Potri.010G085100	-5.1	0.0013	TRUE
Potri.010G115900	-5.1	1.3e-16	TRUE
Potri.011G123300	-5.1	2.6e-38	TRUE
Potri.011G126900	-5.1	7.5e-11	TRUE
Potri.013G011700	-5.1	2.7e-05	TRUE
Potri.015G074500	-5.1	3.5e-24	TRUE
Potri.017G108300	-5.1	9.7e-08	TRUE
Potri.001G008900	-5	1.1e-09	TRUE
Potri.001G083500	-5	4e-13	TRUE
Potri.002G256900	-5	8e-46	TRUE
Potri.004G180200	-5	8.2e-05	TRUE
Potri.006G022500	-5	3e-16	TRUE
Potri.006G260300	-5	3.8e-06	TRUE
Potri.007G121100	-5	4.5e-30	TRUE
Potri.008G185800	-5	5.6e-05	TRUE
Potri.011G070500	-5	8.7e-22	TRUE
Potri.012G094400	-5	8.8e-20	TRUE
Potri.014G138900	-5	3.1e-05	TRUE
Potri.015G026300	-5	3e-10	TRUE
Potri.015G041000	-5	0.0055	TRUE
Potri.019G090300	-5	2.7e-31	TRUE
Potri.003G195900	-4.9	1.3e-11	TRUE
Potri.005G122400	-4.9	7.9e-32	TRUE
Potri.005G243800	-4.9	1.3e-11	TRUE
Potri.009G033900	-4.9	5.1e-13	TRUE
Potri.010G115100	-4.9	1.4e-28	TRUE
Potri.010G217200	-4.9	1.4e-13	TRUE
Potri.014G014000	-4.9	8.5e-13	TRUE
Potri.015G101700	-4.9	0.0004	TRUE
Potri.017G108400	-4.9	6.5e-13	TRUE
Potri.019G052300	-4.9	3e-13	TRUE
Potri.019G075500	-4.9	4.6e-15	TRUE
Potri.004G007200	-4.8	5.4e-05	TRUE
Potri.006G157100	-4.8	0.021	TRUE
Potri.006G199400	-4.8	6.1e-06	TRUE
Potri.008G051500	-4.8	0.03	TRUE
Potri.008G149200	-4.8	1.2e-08	TRUE
Potri.010G006700	-4.8	0.032	TRUE
Potri.011G157900	-4.8	1.3e-09	TRUE
Potri.012G007200	-4.8	4.7e-05	TRUE
Potri.013G023900	-4.8	0.003	TRUE
Potri.013G112000	-4.8	0.016	TRUE
Potri.016G078900	-4.8	6e-06	TRUE
Potri.017G036700	-4.8	1.1e-40	TRUE
Potri.T137100	-4.8	6.3e-07	TRUE
Potri.003G213700	-4.7	1.3e-11	TRUE
Potri.004G092800	-4.7	2e-30	TRUE
Potri.004G133200	-4.7	2.4e-08	TRUE
Potri.008G174100	-4.7	8.2e-45	TRUE
Potri.010G191400	-4.7	0.0015	TRUE
Potri.013G136400	-4.7	4.7e-05	TRUE
Potri.015G133900	-4.7	5.8e-24	TRUE
Potri.017G056100	-4.7	0.0015	TRUE
Potri.T156100	-4.7	5.2e-06	TRUE
Potri.001G025800	-4.6	0.025	TRUE
Potri.002G119700	-4.6	8.4e-33	TRUE
Potri.003G087000	-4.6	2e-23	TRUE
Potri.004G007000	-4.6	9.7e-10	TRUE
Potri.004G093000	-4.6	3e-15	TRUE
Potri.005G006800	-4.6	5.3e-23	TRUE
Potri.006G234900	-4.6	3.7e-13	TRUE
Potri.007G043400	-4.6	0.0015	TRUE
Potri.008G155200	-4.6	2.1e-18	TRUE
Potri.008G166000	-4.6	9.6e-17	TRUE
Potri.013G005900	-4.6	6.5e-49	TRUE
Potri.015G046600	-4.6	0.004	TRUE
Potri.016G035100	-4.6	1.8e-09	TRUE
Potri.018G129600	-4.6	2.8e-06	TRUE
Potri.T141400	-4.6	1e-07	TRUE
Potri.001G282000	-4.5	1.3e-08	TRUE
Potri.002G092200	-4.5	4e-24	TRUE
Potri.005G065400	-4.5	4.7e-09	TRUE
Potri.007G027900	-4.5	6.8e-31	TRUE
Potri.011G114000	-4.5	6e-51	TRUE
Potri.014G027800	-4.5	3e-06	TRUE
Potri.015G104400	-4.5	1.3e-18	TRUE
Potri.018G030600	-4.5	0.034	TRUE
Potri.001G324500	-4.4	3.4e-15	TRUE
Potri.001G388900	-4.4	1.6e-16	TRUE
Potri.002G102100	-4.4	7.5e-39	TRUE
Potri.004G212800	-4.4	7e-12	TRUE
Potri.006G038300	-4.4	2e-17	TRUE
Potri.007G143700	-4.4	0.013	TRUE
Potri.008G159100	-4.4	1.8e-22	TRUE
Potri.011G113200	-4.4	1.8e-07	TRUE
Potri.012G034900	-4.4	1.1e-10	TRUE
Potri.013G137200	-4.4	1.6e-45	TRUE
Potri.015G143900	-4.4	1e-06	TRUE
Potri.018G135100	-4.4	3.7e-05	TRUE
Potri.001G070900	-4.3	4.7e-27	TRUE
Potri.001G083700	-4.3	6.7e-12	TRUE
Potri.001G092100	-4.3	7.7e-15	TRUE
Potri.001G220400	-4.3	9.8e-10	TRUE
Potri.002G235800	-4.3	4e-12	TRUE
Potri.003G118700	-4.3	0.036	TRUE
Potri.004G007100	-4.3	2.6e-06	TRUE
Potri.005G244600	-4.3	1.2e-13	TRUE
Potri.005G248900	-4.3	1e-29	TRUE
Potri.006G058600	-4.3	5.2e-08	TRUE
Potri.006G083000	-4.3	0.00087	TRUE
Potri.008G044300	-4.3	5.7e-16	TRUE
Potri.009G147100	-4.3	0.0011	TRUE
Potri.010G245300	-4.3	6.8e-11	TRUE
Potri.011G060300	-4.3	0.045	TRUE
Potri.011G095600	-4.3	7.4e-20	TRUE
Potri.012G033900	-4.3	2.2e-07	TRUE
Potri.012G078900	-4.3	1.1e-32	TRUE
Potri.014G170800	-4.3	2.5e-25	TRUE
Potri.T022000	-4.3	2.5e-06	TRUE
Potri.T155800	-4.3	2.9e-21	TRUE
Potri.T158400	-4.3	2.1e-09	TRUE
Potri.001G268500	-4.2	1.1e-21	TRUE
Potri.001G351300	-4.2	2.3e-14	TRUE
Potri.001G404100	-4.2	1.1e-35	TRUE
Potri.007G024000	-4.2	2.8e-05	TRUE
Potri.007G083400	-4.2	5e-13	TRUE
Potri.009G062700	-4.2	4.4e-16	TRUE
Potri.009G079200	-4.2	0.044	TRUE
Potri.010G062800	-4.2	0.0028	TRUE
Potri.010G240700	-4.2	0.0038	TRUE
Potri.011G125900	-4.2	7.1e-20	TRUE
Potri.014G116800	-4.2	3.9e-18	TRUE
Potri.015G091900	-4.2	5.6e-16	TRUE
Potri.015G092000	-4.2	3.7e-06	TRUE
Potri.017G002500	-4.2	0.019	TRUE
Potri.017G082500	-4.2	1.5e-08	TRUE
Potri.019G053900	-4.2	0.026	TRUE
Potri.T063800	-4.2	3.3e-20	TRUE
Potri.T102000	-4.2	0.014	TRUE
Potri.001G168000	-4.1	5.9e-15	TRUE
Potri.002G050700	-4.1	0.0011	TRUE
Potri.003G187100	-4.1	1e-11	TRUE
Potri.004G025200	-4.1	2.4e-21	TRUE
Potri.005G002100	-4.1	9.2e-24	TRUE
Potri.005G024800	-4.1	1.6e-29	TRUE
Potri.006G067300	-4.1	1.4e-28	TRUE
Potri.008G154900	-4.1	0.002	TRUE
Potri.009G037300	-4.1	5.5e-19	TRUE
Potri.010G085300	-4.1	0.02	TRUE
Potri.011G161100	-4.1	0.00012	TRUE
Potri.013G143800	-4.1	0.0042	TRUE
Potri.018G038100	-4.1	7.7e-34	TRUE
Potri.018G146200	-4.1	0.0019	TRUE
Potri.T158500	-4.1	7.9e-09	TRUE
Potri.001G268600	-4	1.8e-12	TRUE
Potri.001G393800	-4	3.1e-27	TRUE
Potri.002G017200	-4	6.5e-20	TRUE
Potri.003G176300	-4	2.1e-19	TRUE
Potri.006G042200	-4	2.4e-21	TRUE
Potri.006G063800	-4	0.00012	TRUE
Potri.007G048400	-4	0.00075	TRUE
Potri.007G121000	-4	0.02	TRUE
Potri.010G165200	-4	1.3e-05	TRUE
Potri.011G089700	-4	1.1e-21	TRUE
Potri.011G113400	-4	7.4e-10	TRUE
Potri.015G076500	-4	1.2e-36	TRUE
Potri.017G080900	-4	4e-08	TRUE
Potri.001G059500	-3.9	1.3e-19	TRUE
Potri.001G294800	-3.9	3.5e-10	TRUE
Potri.004G051700	-3.9	8e-24	TRUE
Potri.004G099900	-3.9	0.0073	TRUE
Potri.005G133900	-3.9	0.00013	TRUE
Potri.005G167000	-3.9	1e-21	TRUE
Potri.006G042400	-3.9	9.7e-10	TRUE
Potri.006G274900	-3.9	0.047	TRUE
Potri.008G127800	-3.9	6.3e-10	TRUE
Potri.010G064000	-3.9	1.4e-11	TRUE
Potri.010G072600	-3.9	3.2e-10	TRUE
Potri.011G159800	-3.9	0.00015	TRUE
Potri.012G002700	-3.9	1.1e-35	TRUE
Potri.015G117900	-3.9	4.4e-05	TRUE
Potri.001G192600	-3.8	1.3e-08	TRUE
Potri.001G223800	-3.8	0.0049	TRUE
Potri.001G223900	-3.8	0.00057	TRUE
Potri.002G039200	-3.8	2.6e-17	TRUE
Potri.002G065600	-3.8	2.5e-25	TRUE
Potri.002G098400	-3.8	2.5e-13	TRUE
Potri.002G104500	-3.8	5.8e-06	TRUE
Potri.003G138400	-3.8	0.00022	TRUE
Potri.004G212000	-3.8	1.1e-24	TRUE
Potri.006G120100	-3.8	0.00012	TRUE
Potri.008G057600	-3.8	2.3e-17	TRUE
Potri.009G094500	-3.8	3.1e-07	TRUE
Potri.011G054200	-3.8	5e-15	TRUE
Potri.014G124500	-3.8	3.4e-13	TRUE
Potri.015G145100	-3.8	0.002	TRUE
Potri.018G115800	-3.8	0.0066	TRUE
Potri.018G134700	-3.8	7.7e-07	TRUE
Potri.T159200	-3.8	7.9e-05	TRUE
Potri.002G206100	-3.7	2.1e-11	TRUE
Potri.004G026600	-3.7	0.0013	TRUE
Potri.004G035700	-3.7	2.9e-28	TRUE
Potri.004G148900	-3.7	0.025	TRUE
Potri.004G169200	-3.7	1.5e-06	TRUE
Potri.006G021600	-3.7	1.9e-24	TRUE
Potri.006G218000	-3.7	2.5e-10	TRUE
Potri.007G089000	-3.7	1.9e-18	TRUE
Potri.008G123500	-3.7	7.5e-18	TRUE
Potri.009G063000	-3.7	7.3e-12	TRUE
Potri.009G109500	-3.7	3.9e-13	TRUE
Potri.010G057000	-3.7	2.2e-23	TRUE
Potri.010G142900	-3.7	1.9e-07	TRUE
Potri.011G039600	-3.7	2e-10	TRUE
Potri.011G059200	-3.7	0.00065	TRUE
Potri.011G095500	-3.7	6.2e-14	TRUE
Potri.012G013400	-3.7	6e-06	TRUE
Potri.013G002000	-3.7	9.5e-05	TRUE
Potri.014G103000	-3.7	1.8e-22	TRUE
Potri.016G020700	-3.7	0.0023	TRUE
Potri.001G192800	-3.6	3.5e-25	TRUE
Potri.001G205100	-3.6	0.00025	TRUE
Potri.001G307500	-3.6	0.00026	TRUE
Potri.001G328000	-3.6	4.1e-08	TRUE
Potri.002G156700	-3.6	5.4e-07	TRUE
Potri.002G219000	-3.6	0.015	TRUE
Potri.003G134800	-3.6	1.5e-07	TRUE
Potri.005G193600	-3.6	2.6e-15	TRUE
Potri.005G208300	-3.6	0.021	TRUE
Potri.005G213500	-3.6	4.3e-30	TRUE
Potri.005G213700	-3.6	0.0051	TRUE
Potri.006G092400	-3.6	1.7e-38	TRUE
Potri.007G123400	-3.6	1.7e-36	TRUE
Potri.007G127700	-3.6	0.026	TRUE
Potri.010G149900	-3.6	5.2e-18	TRUE
Potri.011G037600	-3.6	1.3e-14	TRUE
Potri.011G041600	-3.6	8.1e-23	TRUE
Potri.011G168400	-3.6	0.014	TRUE
Potri.013G001900	-3.6	2.2e-07	TRUE
Potri.015G081500	-3.6	1.6e-12	TRUE
Potri.015G146800	-3.6	0.03	TRUE
Potri.017G096300	-3.6	0.011	TRUE
Potri.017G108500	-3.6	6.6e-31	TRUE
Potri.018G129000	-3.6	1.8e-05	TRUE
Potri.T057900	-3.6	1.6e-08	TRUE
Potri.T125000	-3.6	0.019	TRUE
Potri.T179400	-3.6	0.0021	TRUE
Potri.001G042600	-3.5	1.2e-08	TRUE
Potri.001G332900	-3.5	1.9e-06	TRUE
Potri.001G334500	-3.5	1.7e-13	TRUE
Potri.001G347600	-3.5	6.7e-15	TRUE
Potri.002G033100	-3.5	1.8e-25	TRUE
Potri.002G192600	-3.5	0.0019	TRUE
Potri.002G218700	-3.5	0.0056	TRUE
Potri.003G162900	-3.5	0.025	TRUE
Potri.004G026100	-3.5	3.2e-24	TRUE
Potri.004G043300	-3.5	0.009	TRUE
Potri.004G148400	-3.5	3.7e-11	TRUE
Potri.004G178900	-3.5	6.4e-06	TRUE
Potri.005G081300	-3.5	5.1e-12	TRUE
Potri.006G023100	-3.5	7e-07	TRUE
Potri.006G048200	-3.5	5.3e-05	TRUE
Potri.008G018900	-3.5	0.00016	TRUE
Potri.008G043900	-3.5	1.7e-19	TRUE
Potri.008G134000	-3.5	0.00017	TRUE
Potri.008G155300	-3.5	1.5e-05	TRUE
Potri.008G173400	-3.5	2.2e-05	TRUE
Potri.009G017900	-3.5	1.1e-05	TRUE
Potri.009G035800	-3.5	8.3e-08	TRUE
Potri.009G063200	-3.5	1.2e-05	TRUE
Potri.009G141400	-3.5	1.4e-08	TRUE
Potri.010G112900	-3.5	0.00055	TRUE
Potri.010G124200	-3.5	0.0042	TRUE
Potri.010G142300	-3.5	2.9e-11	TRUE
Potri.010G205200	-3.5	3.4e-10	TRUE
Potri.010G206500	-3.5	3.8e-06	TRUE
Potri.011G039100	-3.5	5.6e-17	TRUE
Potri.013G013900	-3.5	1.8e-05	TRUE
Potri.014G098800	-3.5	1.1e-05	TRUE
Potri.014G170000	-3.5	0.02	TRUE
Potri.014G185600	-3.5	0.01	TRUE
Potri.015G074200	-3.5	4.8e-18	TRUE
Potri.016G102100	-3.5	1.1e-07	TRUE
Potri.017G110700	-3.5	3.9e-05	TRUE
Potri.019G118200	-3.5	0.00051	TRUE
Potri.019G125100	-3.5	1.4e-08	TRUE
Potri.T115000	-3.5	3e-06	TRUE
Potri.001G148900	-3.4	4.5e-18	TRUE
Potri.001G407900	-3.4	4.7e-05	TRUE
Potri.002G165100	-3.4	0.00072	TRUE
Potri.004G034400	-3.4	4.2e-24	TRUE
Potri.004G148600	-3.4	0.033	TRUE
Potri.004G180100	-3.4	0.00059	TRUE
Potri.005G110400	-3.4	3.6e-10	TRUE
Potri.006G002400	-3.4	0.035	TRUE
Potri.006G036200	-3.4	1.8e-08	TRUE
Potri.007G103900	-3.4	0.00058	TRUE
Potri.007G111800	-3.4	5.9e-07	TRUE
Potri.008G145300	-3.4	4.7e-11	TRUE
Potri.009G049900	-3.4	0.00018	TRUE
Potri.009G060400	-3.4	0.0076	TRUE
Potri.009G094600	-3.4	0.0038	TRUE
Potri.010G006800	-3.4	5.1e-14	TRUE
Potri.010G062900	-3.4	3.3e-46	TRUE
Potri.013G007000	-3.4	2.3e-07	TRUE
Potri.013G103700	-3.4	0.0032	TRUE
Potri.014G022300	-3.4	0.00013	TRUE
Potri.016G049600	-3.4	2e-09	TRUE
Potri.017G083500	-3.4	0.032	TRUE
Potri.017G099500	-3.4	0.0014	TRUE
Potri.019G090900	-3.4	7.2e-06	TRUE
Potri.001G258100	-3.3	1.8e-33	TRUE
Potri.001G372500	-3.3	1.3e-07	TRUE
Potri.001G413400	-3.3	0.00061	TRUE
Potri.002G042300	-3.3	0.028	TRUE
Potri.002G122800	-3.3	7.2e-27	TRUE
Potri.002G147100	-3.3	2.7e-31	TRUE
Potri.003G086500	-3.3	0.00072	TRUE
Potri.003G187000	-3.3	2.2e-05	TRUE
Potri.004G061300	-3.3	8.4e-07	TRUE
Potri.004G116100	-3.3	1.3e-11	TRUE
Potri.004G179800	-3.3	0.00096	TRUE
Potri.004G179900	-3.3	0.0074	TRUE
Potri.005G195000	-3.3	2.1e-16	TRUE
Potri.005G214200	-3.3	1.2e-11	TRUE
Potri.006G020000	-3.3	1.6e-07	TRUE
Potri.006G040900	-3.3	2.9e-14	TRUE
Potri.006G179300	-3.3	2.5e-05	TRUE
Potri.007G143800	-3.3	6.9e-08	TRUE
Potri.008G007000	-3.3	4.5e-13	TRUE
Potri.008G035900	-3.3	1.4e-09	TRUE
Potri.008G055600	-3.3	0.0012	TRUE
Potri.009G104000	-3.3	8.7e-10	TRUE
Potri.010G064200	-3.3	2e-09	TRUE
Potri.010G089800	-3.3	9.4e-32	TRUE
Potri.011G010700	-3.3	0.00085	TRUE
Potri.011G039500	-3.3	6.6e-07	TRUE
Potri.011G134100	-3.3	0.0022	TRUE
Potri.012G048200	-3.3	1.4e-27	TRUE
Potri.012G079100	-3.3	3e-07	TRUE
Potri.013G118600	-3.3	0.00033	TRUE
Potri.014G193800	-3.3	1.4e-10	TRUE
Potri.015G031900	-3.3	6.4e-05	TRUE
Potri.015G099700	-3.3	5.5e-18	TRUE
Potri.017G128600	-3.3	6.6e-31	TRUE
Potri.017G140100	-3.3	0.019	TRUE
Potri.018G057800	-3.3	0.049	TRUE
Potri.019G077200	-3.3	0.041	TRUE
Potri.T174900	-3.3	0.033	TRUE
Potri.001G080600	-3.2	0.00066	TRUE
Potri.002G166300	-3.2	3.5e-15	TRUE
Potri.002G191600	-3.2	7e-22	TRUE
Potri.003G046700	-3.2	5.7e-08	TRUE
Potri.003G121400	-3.2	1.2e-22	TRUE
Potri.005G072000	-3.2	4.3e-46	TRUE
Potri.005G087200	-3.2	1.2e-14	TRUE
Potri.005G215600	-3.2	9.7e-33	TRUE
Potri.005G216000	-3.2	0.00068	TRUE
Potri.005G244500	-3.2	9e-17	TRUE
Potri.006G055600	-3.2	5.8e-07	TRUE
Potri.006G087200	-3.2	5.5e-28	TRUE
Potri.006G093500	-3.2	4.1e-08	TRUE
Potri.006G101200	-3.2	0.0073	TRUE
Potri.008G118400	-3.2	8.3e-08	TRUE
Potri.008G187800	-3.2	1.3e-05	TRUE
Potri.009G127800	-3.2	6.9e-14	TRUE
Potri.009G131000	-3.2	0.0013	TRUE
Potri.011G159600	-3.2	0.024	TRUE
Potri.012G001000	-3.2	5.9e-12	TRUE
Potri.012G099500	-3.2	0.013	TRUE
Potri.013G005800	-3.2	1.5e-25	TRUE
Potri.014G019300	-3.2	0.0042	TRUE
Potri.014G155000	-3.2	2.8e-10	TRUE
Potri.017G102100	-3.2	1.7e-12	TRUE
Potri.018G008300	-3.2	1.5e-06	TRUE
Potri.018G095000	-3.2	6.3e-05	TRUE
Potri.001G020600	-3.1	2.9e-06	TRUE
Potri.001G453800	-3.1	2.2e-11	TRUE
Potri.002G016100	-3.1	1.5e-16	TRUE
Potri.002G187300	-3.1	2e-12	TRUE
Potri.004G074000	-3.1	6.6e-10	TRUE
Potri.004G097700	-3.1	0.0077	TRUE
Potri.004G135400	-3.1	1.5e-11	TRUE
Potri.005G026700	-3.1	6.7e-09	TRUE
Potri.005G169700	-3.1	1.3e-24	TRUE
Potri.007G044300	-3.1	2.4e-32	TRUE
Potri.008G155100	-3.1	8.6e-06	TRUE
Potri.008G163200	-3.1	0.00015	TRUE
Potri.008G179300	-3.1	2.7e-06	TRUE
Potri.009G069200	-3.1	0.003	TRUE
Potri.009G100500	-3.1	9.1e-06	TRUE
Potri.009G141500	-3.1	4.3e-07	TRUE
Potri.009G167300	-3.1	0.00099	TRUE
Potri.010G072400	-3.1	0.00011	TRUE
Potri.010G127900	-3.1	1.5e-08	TRUE
Potri.010G245200	-3.1	4.3e-10	TRUE
Potri.010G252700	-3.1	1.9e-06	TRUE
Potri.011G042000	-3.1	1.1e-05	TRUE
Potri.011G153000	-3.1	0.0047	TRUE
Potri.011G158100	-3.1	0.0079	TRUE
Potri.012G037400	-3.1	4.2e-05	TRUE
Potri.012G142000	-3.1	0.0031	TRUE
Potri.013G001800	-3.1	3.1e-07	TRUE
Potri.014G069100	-3.1	1.8e-33	TRUE
Potri.014G071200	-3.1	2.9e-12	TRUE
Potri.018G094300	-3.1	0.00077	TRUE
Potri.T088900	-3.1	0.038	TRUE
Potri.001G057700	-3	0.015	TRUE
Potri.001G203800	-3	0.028	TRUE
Potri.002G050500	-3	3.3e-05	TRUE
Potri.002G081000	-3	5.2e-37	TRUE
Potri.002G113900	-3	0.033	TRUE
Potri.003G077300	-3	8.4e-08	TRUE
Potri.003G120100	-3	0.012	TRUE
Potri.004G106600	-3	0.0066	TRUE
Potri.004G132500	-3	0.002	TRUE
Potri.005G134600	-3	6.2e-22	TRUE
Potri.006G128900	-3	0.012	TRUE
Potri.007G064400	-3	6.5e-05	TRUE
Potri.007G111700	-3	0.032	TRUE
Potri.008G172200	-3	1.2e-16	TRUE
Potri.009G143900	-3	0.0064	TRUE
Potri.010G085200	-3	0.0099	TRUE
Potri.010G092400	-3	0.00027	TRUE
Potri.010G107200	-3	9.7e-11	TRUE
Potri.010G196400	-3	1.5e-21	TRUE
Potri.011G116000	-3	0.017	TRUE
Potri.013G154400	-3	2e-13	TRUE
Potri.014G039800	-3	5.2e-26	TRUE
Potri.014G118400	-3	9.1e-31	TRUE
Potri.016G101700	-3	7.4e-18	TRUE
Potri.017G051900	-3	7.8e-08	TRUE
Potri.017G126100	-3	8.4e-08	TRUE
Potri.018G040500	-3	0.00036	TRUE
Potri.T146100	-3	1.3e-07	TRUE
Potri.001G055600	-2.9	0.044	TRUE
Potri.001G322400	-2.9	0.0088	TRUE
Potri.001G401700	-2.9	0.00029	TRUE
Potri.001G441900	-2.9	9.3e-07	TRUE
Potri.002G202600	-2.9	3.7e-05	TRUE
Potri.003G092100	-2.9	2.5e-07	TRUE
Potri.003G152000	-2.9	1.8e-17	TRUE
Potri.003G186800	-2.9	2.1e-05	TRUE
Potri.004G026300	-2.9	2.9e-07	TRUE
Potri.004G026400	-2.9	2.8e-07	TRUE
Potri.004G101400	-2.9	0.0046	TRUE
Potri.004G135300	-2.9	1.6e-34	TRUE
Potri.004G166900	-2.9	1.1e-21	TRUE
Potri.005G111500	-2.9	0.0032	TRUE
Potri.006G018200	-2.9	0.019	TRUE
Potri.007G099400	-2.9	3.8e-23	TRUE
Potri.008G137700	-2.9	3.1e-09	TRUE
Potri.009G144500	-2.9	1.6e-06	TRUE
Potri.009G169100	-2.9	0.0017	TRUE
Potri.010G055200	-2.9	1.8e-07	TRUE
Potri.011G043700	-2.9	0.039	TRUE
Potri.011G052100	-2.9	0.0014	TRUE
Potri.013G031600	-2.9	0.0058	TRUE
Potri.013G041700	-2.9	5.8e-06	TRUE
Potri.013G102900	-2.9	4.8e-05	TRUE
Potri.013G151000	-2.9	1.2e-08	TRUE
Potri.016G052200	-2.9	4.7e-08	TRUE
Potri.016G097100	-2.9	0.017	TRUE
Potri.016G117300	-2.9	4.9e-13	TRUE
Potri.016G121600	-2.9	1.4e-07	TRUE
Potri.017G033100	-2.9	0.0076	TRUE
Potri.018G046900	-2.9	9.9e-08	TRUE
Potri.018G100200	-2.9	8.9e-14	TRUE
Potri.018G111700	-2.9	0.00024	TRUE
Potri.018G129200	-2.9	2.9e-19	TRUE
Potri.001G278600	-2.8	2.2e-17	TRUE
Potri.001G290300	-2.8	5.8e-08	TRUE
Potri.001G352200	-2.8	0.0034	TRUE
Potri.001G462100	-2.8	0.019	TRUE
Potri.002G127100	-2.8	3.2e-11	TRUE
Potri.003G005100	-2.8	0.007	TRUE
Potri.003G070500	-2.8	2.8e-08	TRUE
Potri.004G055500	-2.8	1.1e-16	TRUE
Potri.004G134200	-2.8	6.2e-08	TRUE
Potri.004G140900	-2.8	1.1e-18	TRUE
Potri.005G096600	-2.8	4.3e-17	TRUE
Potri.005G101600	-2.8	7e-42	TRUE
Potri.005G202200	-2.8	0.0011	TRUE
Potri.006G044800	-2.8	0.042	TRUE
Potri.006G095100	-2.8	9.3e-06	TRUE
Potri.006G202700	-2.8	1e-05	TRUE
Potri.006G204000	-2.8	0.0038	TRUE
Potri.007G049700	-2.8	6.4e-08	TRUE
Potri.007G072600	-2.8	0.0023	TRUE
Potri.007G086000	-2.8	8.1e-52	TRUE
Potri.008G021800	-2.8	0.044	TRUE
Potri.008G061700	-2.8	2.4e-11	TRUE
Potri.008G150600	-2.8	1.1e-08	TRUE
Potri.008G166200	-2.8	1.3e-09	TRUE
Potri.009G051300	-2.8	0.0015	TRUE
Potri.010G012100	-2.8	4.4e-08	TRUE
Potri.012G122800	-2.8	0.031	TRUE
Potri.015G042000	-2.8	6.2e-22	TRUE
Potri.015G106900	-2.8	0.0022	TRUE
Potri.015G144500	-2.8	9.3e-07	TRUE
Potri.016G045100	-2.8	0.013	TRUE
Potri.017G052300	-2.8	4.4e-12	TRUE
Potri.017G118600	-2.8	2.2e-06	TRUE
Potri.018G094000	-2.8	8.8e-11	TRUE
Potri.018G094100	-2.8	0.00074	TRUE
Potri.018G103400	-2.8	0.0081	TRUE
Potri.018G119900	-2.8	0.049	TRUE
Potri.018G132800	-2.8	3.5e-07	TRUE
Potri.018G149300	-2.8	2.2e-06	TRUE
Potri.T063000	-2.8	1.4e-08	TRUE
Potri.T135900	-2.8	6.1e-38	TRUE
Potri.001G007100	-2.7	0.03	TRUE
Potri.001G073100	-2.7	6e-13	TRUE
Potri.001G105200	-2.7	9.8e-34	TRUE
Potri.001G416700	-2.7	7e-11	TRUE
Potri.001G452000	-2.7	0.0017	TRUE
Potri.001G461900	-2.7	0.0089	TRUE
Potri.002G020600	-2.7	0.00051	TRUE
Potri.003G071100	-2.7	7.1e-16	TRUE
Potri.003G130000	-2.7	0.015	TRUE
Potri.003G165700	-2.7	3.2e-12	TRUE
Potri.004G027400	-2.7	0.031	TRUE
Potri.004G174100	-2.7	2e-20	TRUE
Potri.004G235500	-2.7	1.3e-06	TRUE
Potri.005G185400	-2.7	1.3e-07	TRUE
Potri.005G205000	-2.7	1.5e-05	TRUE
Potri.005G244700	-2.7	7.2e-20	TRUE
Potri.006G022600	-2.7	0.00044	TRUE
Potri.006G039500	-2.7	1.2e-31	TRUE
Potri.006G060700	-2.7	1.8e-08	TRUE
Potri.006G103900	-2.7	2.7e-12	TRUE
Potri.006G139700	-2.7	1e-05	TRUE
Potri.006G183800	-2.7	1.5e-07	TRUE
Potri.008G047900	-2.7	0.0002	TRUE
Potri.008G093200	-2.7	4.7e-06	TRUE
Potri.008G101400	-2.7	1.6e-33	TRUE
Potri.008G110200	-2.7	0.0035	TRUE
Potri.008G169400	-2.7	7.8e-12	TRUE
Potri.008G172500	-2.7	5.3e-06	TRUE
Potri.008G175900	-2.7	8.5e-06	TRUE
Potri.008G176200	-2.7	0.0037	TRUE
Potri.009G036100	-2.7	0.0013	TRUE
Potri.009G054700	-2.7	0.0018	TRUE
Potri.009G055300	-2.7	0.00048	TRUE
Potri.010G011700	-2.7	6.5e-07	TRUE
Potri.010G082000	-2.7	4.2e-11	TRUE
Potri.010G096100	-2.7	1.3e-26	TRUE
Potri.010G106900	-2.7	4.6e-07	TRUE
Potri.010G127600	-2.7	6.3e-19	TRUE
Potri.010G149800	-2.7	0.014	TRUE
Potri.010G230400	-2.7	1.4e-07	TRUE
Potri.010G251800	-2.7	1.2e-17	TRUE
Potri.011G029500	-2.7	5.8e-05	TRUE
Potri.011G037300	-2.7	2.1e-15	TRUE
Potri.011G037400	-2.7	3.6e-18	TRUE
Potri.012G115400	-2.7	0.0089	TRUE
Potri.013G062100	-2.7	0.00012	TRUE
Potri.013G083600	-2.7	8.2e-06	TRUE
Potri.013G103900	-2.7	0.048	TRUE
Potri.013G113100	-2.7	1.6e-07	TRUE
Potri.014G008600	-2.7	3.3e-05	TRUE
Potri.014G146700	-2.7	1.6e-10	TRUE
Potri.014G180300	-2.7	0.00024	TRUE
Potri.015G001700	-2.7	1e-05	TRUE
Potri.015G046200	-2.7	1.1e-07	TRUE
Potri.016G035200	-2.7	1.5e-28	TRUE
Potri.018G121000	-2.7	0.021	TRUE
Potri.019G017600	-2.7	0.0038	TRUE
Potri.019G056400	-2.7	0.044	TRUE
Potri.T029200	-2.7	0.035	TRUE
Potri.T101700	-2.7	0.00053	TRUE
Potri.001G010600	-2.6	4.6e-08	TRUE
Potri.001G011500	-2.6	0.00074	TRUE
Potri.001G033100	-2.6	0.034	TRUE
Potri.001G149100	-2.6	9.5e-27	TRUE
Potri.001G219100	-2.6	1.6e-24	TRUE
Potri.001G268400	-2.6	0.0035	TRUE
Potri.001G296900	-2.6	0.0027	TRUE
Potri.001G302500	-2.6	1.7e-06	TRUE
Potri.001G342100	-2.6	1.4e-06	TRUE
Potri.001G356200	-2.6	2.5e-12	TRUE
Potri.001G407500	-2.6	0.0027	TRUE
Potri.001G408000	-2.6	0.001	TRUE
Potri.001G442200	-2.6	0.0014	TRUE
Potri.002G080700	-2.6	1.4e-05	TRUE
Potri.002G122400	-2.6	0.00088	TRUE
Potri.003G139300	-2.6	4.4e-13	TRUE
Potri.003G144000	-2.6	2.4e-05	TRUE
Potri.003G182200	-2.6	1.2e-09	TRUE
Potri.003G202600	-2.6	2.5e-13	TRUE
Potri.004G023900	-2.6	1.2e-07	TRUE
Potri.004G167100	-2.6	0.014	TRUE
Potri.005G002300	-2.6	0.0024	TRUE
Potri.005G007200	-2.6	0.00032	TRUE
Potri.005G078000	-2.6	8.4e-09	TRUE
Potri.005G193000	-2.6	0.0016	TRUE
Potri.005G205900	-2.6	0.00011	TRUE
Potri.006G091200	-2.6	0.014	TRUE
Potri.006G164600	-2.6	3.4e-22	TRUE
Potri.006G277400	-2.6	1.1e-35	TRUE
Potri.007G113700	-2.6	4.6e-07	TRUE
Potri.007G120400	-2.6	0.008	TRUE
Potri.008G031000	-2.6	0.017	TRUE
Potri.008G132800	-2.6	2.1e-09	TRUE
Potri.009G038300	-2.6	9.1e-14	TRUE
Potri.009G109800	-2.6	1.9e-13	TRUE
Potri.009G143800	-2.6	2.1e-06	TRUE
Potri.010G085400	-2.6	8.1e-05	TRUE
Potri.010G225400	-2.6	5.8e-13	TRUE
Potri.011G076900	-2.6	3.9e-30	TRUE
Potri.011G081700	-2.6	0.019	TRUE
Potri.012G052200	-2.6	5.2e-08	TRUE
Potri.013G028400	-2.6	0.0042	TRUE
Potri.013G035400	-2.6	0.02	TRUE
Potri.013G059000	-2.6	2.5e-08	TRUE
Potri.013G062300	-2.6	1.9e-15	TRUE
Potri.013G102700	-2.6	4.2e-16	TRUE
Potri.014G006400	-2.6	0.00032	TRUE
Potri.016G068500	-2.6	3e-07	TRUE
Potri.017G023400	-2.6	1.9e-08	TRUE
Potri.017G046200	-2.6	0.0015	TRUE
Potri.017G047400	-2.6	3.2e-06	TRUE
Potri.017G052600	-2.6	0.00086	TRUE
Potri.018G053700	-2.6	0.00048	TRUE
Potri.018G088800	-2.6	0.0074	TRUE
Potri.018G113700	-2.6	4.3e-11	TRUE
Potri.019G073300	-2.6	1.3e-05	TRUE
Potri.019G093800	-2.6	0.0078	TRUE
Potri.019G116500	-2.6	1.4e-08	TRUE
Potri.T098100	-2.6	0.00019	TRUE
Potri.001G007000	-2.5	2.5e-16	TRUE
Potri.001G147200	-2.5	2.3e-09	TRUE
Potri.001G256400	-2.5	1.3e-12	TRUE
Potri.001G403000	-2.5	2.7e-16	TRUE
Potri.001G441800	-2.5	4.2e-05	TRUE
Potri.002G012800	-2.5	0.00025	TRUE
Potri.002G064300	-2.5	1.1e-05	TRUE
Potri.002G157800	-2.5	0.022	TRUE
Potri.002G203500	-2.5	1.1e-08	TRUE
Potri.002G218800	-2.5	0.003	TRUE
Potri.002G224100	-2.5	1.7e-08	TRUE
Potri.003G091000	-2.5	1.4e-26	TRUE
Potri.003G152300	-2.5	6.5e-06	TRUE
Potri.004G000400	-2.5	0.0061	TRUE
Potri.004G046000	-2.5	0.0029	TRUE
Potri.004G070900	-2.5	0.03	TRUE
Potri.004G182000	-2.5	1.5e-05	TRUE
Potri.005G024500	-2.5	3.9e-15	TRUE
Potri.005G077900	-2.5	0.038	TRUE
Potri.005G097900	-2.5	0.0061	TRUE
Potri.005G106400	-2.5	3e-24	TRUE
Potri.005G203200	-2.5	1.2e-05	TRUE
Potri.005G214800	-2.5	1.1e-16	TRUE
Potri.005G220900	-2.5	1.9e-08	TRUE
Potri.005G229800	-2.5	5.7e-12	TRUE
Potri.006G019800	-2.5	0.0015	TRUE
Potri.006G101400	-2.5	2.7e-10	TRUE
Potri.007G039400	-2.5	1.9e-19	TRUE
Potri.008G066000	-2.5	6.9e-07	TRUE
Potri.008G067300	-2.5	3.9e-05	TRUE
Potri.008G096500	-2.5	5.6e-30	TRUE
Potri.008G118600	-2.5	3.7e-29	TRUE
Potri.008G171000	-2.5	2e-17	TRUE
Potri.009G070500	-2.5	6e-05	TRUE
Potri.009G073200	-2.5	2.7e-26	TRUE
Potri.009G117500	-2.5	4e-17	TRUE
Potri.010G187800	-2.5	1.2e-13	TRUE
Potri.012G100900	-2.5	0.028	TRUE
Potri.012G114300	-2.5	0.0028	TRUE
Potri.013G012600	-2.5	2.7e-09	TRUE
Potri.013G062400	-2.5	3.8e-23	TRUE
Potri.014G014500	-2.5	4.8e-10	TRUE
Potri.014G067900	-2.5	0.029	TRUE
Potri.014G085800	-2.5	0.00012	TRUE
Potri.014G118700	-2.5	0.0056	TRUE
Potri.014G165100	-2.5	8.6e-08	TRUE
Potri.014G167100	-2.5	0.018	TRUE
Potri.015G015800	-2.5	3e-07	TRUE
Potri.015G062600	-2.5	0.00068	TRUE
Potri.017G040500	-2.5	0.00071	TRUE
Potri.017G040600	-2.5	0.0052	TRUE
Potri.018G075200	-2.5	4.1e-13	TRUE
Potri.018G143300	-2.5	0.028	TRUE
Potri.019G042300	-2.5	0.0045	TRUE
Potri.019G094100	-2.5	0.00079	TRUE
Potri.019G118100	-2.5	6.1e-05	TRUE
Potri.T022600	-2.5	2.1e-06	TRUE
Potri.T106400	-2.5	1.1e-09	TRUE
Potri.T125900	-2.5	8.1e-05	TRUE
Potri.T131900	-2.5	4.1e-06	TRUE
Potri.T137400	-2.5	3.7e-21	TRUE
Potri.T140100	-2.5	0.013	TRUE
Potri.001G044300	-2.4	2.7e-10	TRUE
Potri.001G160200	-2.4	0.00054	TRUE
Potri.001G309900	-2.4	0.046	TRUE
Potri.001G364900	-2.4	0.0011	TRUE
Potri.001G378400	-2.4	1.1e-19	TRUE
Potri.001G405400	-2.4	9.3e-09	TRUE
Potri.001G437900	-2.4	0.026	TRUE
Potri.002G130500	-2.4	1.3e-09	TRUE
Potri.003G098300	-2.4	0.0022	TRUE
Potri.003G100500	-2.4	8.3e-21	TRUE
Potri.003G105500	-2.4	4.5e-15	TRUE
Potri.003G109200	-2.4	0.00017	TRUE
Potri.003G137300	-2.4	0.00011	TRUE
Potri.003G193800	-2.4	9.1e-16	TRUE
Potri.004G014700	-2.4	2.9e-08	TRUE
Potri.004G033100	-2.4	8.8e-12	TRUE
Potri.004G093100	-2.4	4.3e-21	TRUE
Potri.004G202200	-2.4	3e-12	TRUE
Potri.005G045100	-2.4	8.5e-12	TRUE
Potri.005G066200	-2.4	4.4e-14	TRUE
Potri.005G197500	-2.4	7.8e-22	TRUE
Potri.005G211800	-2.4	3.5e-06	TRUE
Potri.005G246300	-2.4	0.00048	TRUE
Potri.006G009500	-2.4	8.2e-05	TRUE
Potri.006G022800	-2.4	3.4e-05	TRUE
Potri.006G041000	-2.4	0.00035	TRUE
Potri.006G068300	-2.4	0.00033	TRUE
Potri.006G094300	-2.4	1.8e-08	TRUE
Potri.006G188400	-2.4	0.032	TRUE
Potri.006G219600	-2.4	3.5e-18	TRUE
Potri.007G111500	-2.4	0.00015	TRUE
Potri.008G000300	-2.4	3.5e-05	TRUE
Potri.008G055900	-2.4	1.1e-20	TRUE
Potri.008G099200	-2.4	0.023	TRUE
Potri.009G027700	-2.4	0.011	TRUE
Potri.009G137100	-2.4	0.00046	TRUE
Potri.009G147700	-2.4	0.00013	TRUE
Potri.010G107000	-2.4	4.7e-05	TRUE
Potri.010G119200	-2.4	0.00012	TRUE
Potri.010G191600	-2.4	1e-12	TRUE
Potri.010G213400	-2.4	5.2e-08	TRUE
Potri.010G213600	-2.4	7.5e-18	TRUE
Potri.011G024900	-2.4	0.0082	TRUE
Potri.011G082400	-2.4	0.045	TRUE
Potri.011G160900	-2.4	0.018	TRUE
Potri.012G007300	-2.4	3.4e-15	TRUE
Potri.012G032500	-2.4	9.4e-05	TRUE
Potri.012G054500	-2.4	0.00019	TRUE
Potri.013G041600	-2.4	2.8e-08	TRUE
Potri.014G034000	-2.4	0.00071	TRUE
Potri.014G164100	-2.4	3.1e-08	TRUE
Potri.015G024100	-2.4	0.035	TRUE
Potri.017G099400	-2.4	0.0004	TRUE
Potri.018G025500	-2.4	0.0031	TRUE
Potri.018G047900	-2.4	0.023	TRUE
Potri.018G097700	-2.4	7.6e-20	TRUE
Potri.018G124500	-2.4	0.0013	TRUE
Potri.T084200	-2.4	0.00052	TRUE
Potri.T091200	-2.4	2.4e-08	TRUE
Potri.T096300	-2.4	2.1e-13	TRUE
Potri.001G044500	-2.3	1.4e-20	TRUE
Potri.001G165000	-2.3	0.0097	TRUE
Potri.001G401400	-2.3	0.0027	TRUE
Potri.002G039100	-2.3	1.5e-09	TRUE
Potri.002G120900	-2.3	0.0058	TRUE
Potri.002G156500	-2.3	2.3e-38	TRUE
Potri.002G163100	-2.3	2.9e-29	TRUE
Potri.002G260300	-2.3	0.00064	TRUE
Potri.003G000800	-2.3	6.2e-15	TRUE
Potri.003G147300	-2.3	0.00019	TRUE
Potri.003G211900	-2.3	3.7e-07	TRUE
Potri.004G026200	-2.3	1.7e-05	TRUE
Potri.004G187200	-2.3	0.00065	TRUE
Potri.005G019200	-2.3	0.0033	TRUE
Potri.005G259000	-2.3	4.2e-31	TRUE
Potri.005G259900	-2.3	0.033	TRUE
Potri.006G067200	-2.3	0.0017	TRUE
Potri.006G068900	-2.3	1.7e-07	TRUE
Potri.006G208100	-2.3	2.8e-12	TRUE
Potri.006G261000	-2.3	0.0092	TRUE
Potri.008G010600	-2.3	6.1e-13	TRUE
Potri.008G106700	-2.3	1.8e-06	TRUE
Potri.009G033500	-2.3	0.0093	TRUE
Potri.009G069500	-2.3	0.029	TRUE
Potri.009G081800	-2.3	4.4e-09	TRUE
Potri.010G072200	-2.3	1.8e-08	TRUE
Potri.010G075800	-2.3	0.0041	TRUE
Potri.010G116000	-2.3	1.6e-15	TRUE
Potri.010G131500	-2.3	5.5e-07	TRUE
Potri.010G237000	-2.3	0.00023	TRUE
Potri.010G240800	-2.3	6.7e-22	TRUE
Potri.011G124200	-2.3	0.013	TRUE
Potri.012G044000	-2.3	5.9e-18	TRUE
Potri.012G055700	-2.3	4.9e-05	TRUE
Potri.012G089500	-2.3	7.8e-09	TRUE
Potri.012G131800	-2.3	6.5e-17	TRUE
Potri.013G080100	-2.3	8.9e-06	TRUE
Potri.013G102800	-2.3	0.00011	TRUE
Potri.014G006700	-2.3	2.5e-05	TRUE
Potri.014G025200	-2.3	1e-23	TRUE
Potri.014G159000	-2.3	3.7e-18	TRUE
Potri.014G161300	-2.3	5e-13	TRUE
Potri.016G079000	-2.3	0.0088	TRUE
Potri.016G124700	-2.3	1.3e-14	TRUE
Potri.017G013700	-2.3	6.1e-13	TRUE
Potri.017G017800	-2.3	7.4e-34	TRUE
Potri.018G006300	-2.3	5e-07	TRUE
Potri.018G094800	-2.3	0.043	TRUE
Potri.018G104900	-2.3	1.9e-44	TRUE
Potri.T095900	-2.3	0.033	TRUE
Potri.001G031800	-2.2	6.2e-14	TRUE
Potri.001G090700	-2.2	3.4e-09	TRUE
Potri.001G091400	-2.2	0.003	TRUE
Potri.001G162000	-2.2	4.6e-12	TRUE
Potri.001G234500	-2.2	1.5e-11	TRUE
Potri.001G238700	-2.2	7.9e-05	TRUE
Potri.001G245200	-2.2	1.1e-13	TRUE
Potri.001G331500	-2.2	1.6e-21	TRUE
Potri.001G352100	-2.2	5.3e-09	TRUE
Potri.001G441400	-2.2	5e-05	TRUE
Potri.001G442000	-2.2	0.00057	TRUE
Potri.001G444700	-2.2	0.018	TRUE
Potri.001G471100	-2.2	1.3e-15	TRUE
Potri.001G471600	-2.2	2e-07	TRUE
Potri.002G018200	-2.2	3.2e-06	TRUE
Potri.002G029500	-2.2	0.00099	TRUE
Potri.002G105900	-2.2	7.9e-27	TRUE
Potri.002G128500	-2.2	0.00038	TRUE
Potri.002G164900	-2.2	2.3e-05	TRUE
Potri.002G165000	-2.2	3.6e-12	TRUE
Potri.002G180800	-2.2	6e-21	TRUE
Potri.003G011200	-2.2	0.0006	TRUE
Potri.003G132300	-2.2	0.00034	TRUE
Potri.003G168400	-2.2	0.0013	TRUE
Potri.003G171800	-2.2	8.4e-18	TRUE
Potri.004G038000	-2.2	3.6e-17	TRUE
Potri.004G050000	-2.2	4.6e-14	TRUE
Potri.005G095400	-2.2	0.0012	TRUE
Potri.005G112700	-2.2	1e-08	TRUE
Potri.005G224100	-2.2	2.8e-05	TRUE
Potri.005G235200	-2.2	4.7e-16	TRUE
Potri.006G101000	-2.2	2.4e-06	TRUE
Potri.008G059200	-2.2	6.5e-23	TRUE
Potri.008G068700	-2.2	4e-08	TRUE
Potri.008G101500	-2.2	5.3e-09	TRUE
Potri.008G101600	-2.2	4e-12	TRUE
Potri.008G141600	-2.2	0.00055	TRUE
Potri.009G010200	-2.2	3.3e-05	TRUE
Potri.009G090600	-2.2	1.1e-10	TRUE
Potri.009G104100	-2.2	3.1e-05	TRUE
Potri.009G106000	-2.2	0.0012	TRUE
Potri.009G148000	-2.2	4.2e-05	TRUE
Potri.010G079400	-2.2	2.8e-06	TRUE
Potri.010G148800	-2.2	0.022	TRUE
Potri.010G199600	-2.2	8.1e-24	TRUE
Potri.010G227000	-2.2	6.2e-14	TRUE
Potri.011G083900	-2.2	0.042	TRUE
Potri.011G158500	-2.2	7.9e-09	TRUE
Potri.012G050100	-2.2	0.00024	TRUE
Potri.012G108700	-2.2	2.7e-09	TRUE
Potri.014G117000	-2.2	2.2e-05	TRUE
Potri.015G018300	-2.2	0.0016	TRUE
Potri.015G083500	-2.2	9.5e-07	TRUE
Potri.015G102300	-2.2	0.0006	TRUE
Potri.016G005000	-2.2	0.041	TRUE
Potri.016G043400	-2.2	3e-09	TRUE
Potri.017G005700	-2.2	0.0008	TRUE
Potri.017G010700	-2.2	9e-06	TRUE
Potri.017G011700	-2.2	0.002	TRUE
Potri.017G041000	-2.2	9.6e-06	TRUE
Potri.017G128800	-2.2	4.2e-24	TRUE
Potri.017G138900	-2.2	3.5e-17	TRUE
Potri.017G145700	-2.2	5.2e-23	TRUE
Potri.018G031700	-2.2	0.023	TRUE
Potri.018G135300	-2.2	0.00026	TRUE
Potri.019G015700	-2.2	0.026	TRUE
Potri.019G018200	-2.2	0.004	TRUE
Potri.019G075600	-2.2	0.0032	TRUE
Potri.019G131600	-2.2	3e-05	TRUE
Potri.T094400	-2.2	2.5e-15	TRUE
Potri.T097900	-2.2	8.7e-08	TRUE
Potri.001G026400	-2.1	8.1e-05	TRUE
Potri.001G118800	-2.1	8.2e-07	TRUE
Potri.001G127600	-2.1	7.7e-09	TRUE
Potri.001G133000	-2.1	3.3e-20	TRUE
Potri.001G141700	-2.1	1.1e-11	TRUE
Potri.001G174500	-2.1	0.048	TRUE
Potri.001G296400	-2.1	4.7e-18	TRUE
Potri.001G309100	-2.1	6.3e-25	TRUE
Potri.001G384100	-2.1	1.3e-06	TRUE
Potri.001G407400	-2.1	0.0028	TRUE
Potri.002G019300	-2.1	4.3e-07	TRUE
Potri.002G125000	-2.1	0.00061	TRUE
Potri.002G131900	-2.1	0.00016	TRUE
Potri.002G176300	-2.1	2.8e-14	TRUE
Potri.002G197900	-2.1	5.2e-17	TRUE
Potri.002G226300	-2.1	3.4e-11	TRUE
Potri.003G104500	-2.1	2.5e-10	TRUE
Potri.003G165600	-2.1	1.1e-07	TRUE
Potri.003G219900	-2.1	4e-10	TRUE
Potri.004G132200	-2.1	8.1e-06	TRUE
Potri.005G099300	-2.1	7.8e-07	TRUE
Potri.005G183300	-2.1	0.025	TRUE
Potri.005G220700	-2.1	2.9e-07	TRUE
Potri.005G223100	-2.1	0.00044	TRUE
Potri.006G103600	-2.1	0.00024	TRUE
Potri.006G175500	-2.1	5.2e-12	TRUE
Potri.007G146400	-2.1	8.7e-23	TRUE
Potri.008G088900	-2.1	0.0011	TRUE
Potri.008G122100	-2.1	2.6e-05	TRUE
Potri.008G212100	-2.1	0.042	TRUE
Potri.009G118300	-2.1	2.2e-07	TRUE
Potri.009G156100	-2.1	0.00054	TRUE
Potri.010G066900	-2.1	2.3e-12	TRUE
Potri.010G146200	-2.1	0.038	TRUE
Potri.010G183700	-2.1	2.2e-38	TRUE
Potri.010G190700	-2.1	5.6e-06	TRUE
Potri.011G044000	-2.1	3.6e-18	TRUE
Potri.011G124300	-2.1	0.0041	TRUE
Potri.011G138500	-2.1	4.1e-05	TRUE
Potri.013G018000	-2.1	0.00037	TRUE
Potri.014G063000	-2.1	0.038	TRUE
Potri.015G069400	-2.1	6.6e-24	TRUE
Potri.016G073900	-2.1	1e-06	TRUE
Potri.016G074800	-2.1	0.014	TRUE
Potri.016G101200	-2.1	1.3e-05	TRUE
Potri.016G131800	-2.1	2.1e-10	TRUE
Potri.017G046700	-2.1	0.015	TRUE
Potri.017G154000	-2.1	0.00083	TRUE
Potri.018G025100	-2.1	6.8e-11	TRUE
Potri.T094000	-2.1	7.4e-16	TRUE
Potri.T168000	-2.1	0.031	TRUE
Potri.001G042500	-2	0.013	TRUE
Potri.001G048800	-2	5.3e-08	TRUE
Potri.001G061800	-2	4.6e-14	TRUE
Potri.001G104400	-2	1.4e-37	TRUE
Potri.001G133300	-2	3.8e-08	TRUE
Potri.001G137100	-2	0.00038	TRUE
Potri.001G461500	-2	0.001	TRUE
Potri.002G013200	-2	1.3e-10	TRUE
Potri.002G049500	-2	0.0035	TRUE
Potri.002G091600	-2	1.4e-05	TRUE
Potri.002G112900	-2	1.3e-07	TRUE
Potri.002G135700	-2	0.0002	TRUE
Potri.002G148000	-2	1.5e-12	TRUE
Potri.002G218300	-2	0.0014	TRUE
Potri.003G052800	-2	2e-08	TRUE
Potri.003G088400	-2	4.8e-11	TRUE
Potri.003G121800	-2	0.0019	TRUE
Potri.003G133700	-2	4.6e-07	TRUE
Potri.003G167500	-2	2.6e-05	TRUE
Potri.003G195000	-2	0.0086	TRUE
Potri.003G202400	-2	1.8e-12	TRUE
Potri.004G067600	-2	0.00041	TRUE
Potri.004G072000	-2	0.0019	TRUE
Potri.005G028100	-2	0.027	TRUE
Potri.005G043300	-2	0.0015	TRUE
Potri.005G062300	-2	0.02	TRUE
Potri.005G078700	-2	6.3e-05	TRUE
Potri.005G082100	-2	7.1e-13	TRUE
Potri.005G121100	-2	1.2e-08	TRUE
Potri.005G160500	-2	0.015	TRUE
Potri.005G181600	-2	5.4e-06	TRUE
Potri.005G204200	-2	4.7e-05	TRUE
Potri.005G214000	-2	1.2e-10	TRUE
Potri.006G004300	-2	0.00058	TRUE
Potri.006G140600	-2	3.5e-11	TRUE
Potri.006G188600	-2	7.8e-07	TRUE
Potri.007G110600	-2	1.8e-08	TRUE
Potri.007G127000	-2	2.6e-05	TRUE
Potri.008G087900	-2	0.0018	TRUE
Potri.008G127200	-2	0.00017	TRUE
Potri.008G185600	-2	4.8e-14	TRUE
Potri.009G020700	-2	1.3e-11	TRUE
Potri.009G036300	-2	4.9e-05	TRUE
Potri.009G095300	-2	0.00041	TRUE
Potri.009G102500	-2	1.4e-19	TRUE
Potri.010G004000	-2	2.7e-31	TRUE
Potri.010G035900	-2	0.00056	TRUE
Potri.010G123000	-2	0.0038	TRUE
Potri.010G125900	-2	0.017	TRUE
Potri.010G169400	-2	4.3e-06	TRUE
Potri.010G172300	-2	5.2e-08	TRUE
Potri.010G190600	-2	0.0024	TRUE
Potri.010G191300	-2	7e-07	TRUE
Potri.011G058900	-2	1.4e-05	TRUE
Potri.011G115600	-2	2.3e-13	TRUE
Potri.011G124800	-2	0.015	TRUE
Potri.012G041900	-2	6.6e-19	TRUE
Potri.012G048300	-2	5.9e-08	TRUE
Potri.012G059400	-2	0.00066	TRUE
Potri.012G089400	-2	1.2e-11	TRUE
Potri.013G001600	-2	1.4e-14	TRUE
Potri.013G006600	-2	2e-19	TRUE
Potri.013G121800	-2	0.049	TRUE
Potri.014G121900	-2	3.1e-17	TRUE
Potri.014G127700	-2	1.2e-08	TRUE
Potri.014G156400	-2	3.1e-09	TRUE
Potri.014G186600	-2	0.013	TRUE
Potri.015G001300	-2	1.1e-06	TRUE
Potri.015G001500	-2	6.2e-10	TRUE
Potri.015G016000	-2	0.0086	TRUE
Potri.015G086000	-2	1.1e-08	TRUE
Potri.015G096500	-2	3e-09	TRUE
Potri.015G135600	-2	5.2e-05	TRUE
Potri.016G016100	-2	0.00056	TRUE
Potri.016G016300	-2	0.0079	TRUE
Potri.016G046500	-2	2.2e-05	TRUE
Potri.016G106600	-2	0.0068	TRUE
Potri.017G006000	-2	0.011	TRUE
Potri.017G046400	-2	0.01	TRUE
Potri.017G094500	-2	1.3e-12	TRUE
Potri.017G094800	-2	0.0052	TRUE
Potri.017G106700	-2	0.0042	TRUE
Potri.018G099200	-2	0.001	TRUE
Potri.019G015600	-2	0.0023	TRUE
Potri.019G117600	-2	1.2e-05	TRUE
Potri.019G118000	-2	2.3e-09	TRUE
Potri.019G130600	-2	3.1e-09	TRUE
Potri.T053500	-2	0.038	TRUE
Potri.T097300	-2	0.0002	TRUE
Potri.T178900	-2	0.00017	TRUE
Potri.001G040800	-1.9	0.011	TRUE
Potri.001G044600	-1.9	0.0017	TRUE
Potri.001G048700	-1.9	1.8e-13	TRUE
Potri.001G080700	-1.9	0.0002	TRUE
Potri.001G100200	-1.9	0.0041	TRUE
Potri.001G119900	-1.9	0.023	TRUE
Potri.001G194100	-1.9	1.4e-09	TRUE
Potri.001G221100	-1.9	0.00058	TRUE
Potri.001G266500	-1.9	0.0025	TRUE
Potri.001G292000	-1.9	0.038	TRUE
Potri.001G313900	-1.9	2.4e-21	TRUE
Potri.001G348000	-1.9	1.9e-10	TRUE
Potri.001G379800	-1.9	1.3e-23	TRUE
Potri.001G402600	-1.9	0.0011	TRUE
Potri.001G407600	-1.9	0.02	TRUE
Potri.002G033400	-1.9	3.5e-07	TRUE
Potri.002G050300	-1.9	2.2e-05	TRUE
Potri.002G057700	-1.9	7.8e-11	TRUE
Potri.002G106400	-1.9	8e-07	TRUE
Potri.002G108600	-1.9	6.1e-07	TRUE
Potri.003G085300	-1.9	3.8e-14	TRUE
Potri.003G093400	-1.9	0.00046	TRUE
Potri.003G165500	-1.9	1.4e-11	TRUE
Potri.004G125300	-1.9	4.4e-05	TRUE
Potri.004G146100	-1.9	6e-10	TRUE
Potri.004G150500	-1.9	0.023	TRUE
Potri.004G193400	-1.9	0.00073	TRUE
Potri.005G081400	-1.9	0.0018	TRUE
Potri.005G133800	-1.9	2.3e-06	TRUE
Potri.005G180200	-1.9	2.8e-19	TRUE
Potri.005G200500	-1.9	0.024	TRUE
Potri.006G053500	-1.9	3.5e-07	TRUE
Potri.006G097500	-1.9	1.3e-15	TRUE
Potri.006G125000	-1.9	0.00075	TRUE
Potri.006G129600	-1.9	6.4e-19	TRUE
Potri.006G161100	-1.9	0.045	TRUE
Potri.006G204300	-1.9	6.5e-08	TRUE
Potri.006G260600	-1.9	0.022	TRUE
Potri.006G266200	-1.9	0.0096	TRUE
Potri.007G006800	-1.9	2.5e-22	TRUE
Potri.008G101000	-1.9	0.014	TRUE
Potri.008G165300	-1.9	0.041	TRUE
Potri.008G176000	-1.9	5.5e-10	TRUE
Potri.008G181600	-1.9	8.6e-07	TRUE
Potri.009G008500	-1.9	6.1e-06	TRUE
Potri.009G063300	-1.9	0.00011	TRUE
Potri.009G144100	-1.9	5.1e-27	TRUE
Potri.009G149200	-1.9	4.8e-15	TRUE
Potri.010G088600	-1.9	4.7e-11	TRUE
Potri.010G142500	-1.9	0.0025	TRUE
Potri.010G164400	-1.9	2.5e-23	TRUE
Potri.010G203400	-1.9	5.7e-16	TRUE
Potri.010G211300	-1.9	2.4e-08	TRUE
Potri.010G241700	-1.9	7.7e-18	TRUE
Potri.011G036500	-1.9	0.00017	TRUE
Potri.011G051600	-1.9	0.015	TRUE
Potri.011G056900	-1.9	1.1e-05	TRUE
Potri.011G113300	-1.9	0.02	TRUE
Potri.011G150300	-1.9	3.9e-10	TRUE
Potri.012G002800	-1.9	4.6e-06	TRUE
Potri.012G031900	-1.9	0.00031	TRUE
Potri.012G041800	-1.9	2e-11	TRUE
Potri.012G054800	-1.9	1.2e-05	TRUE
Potri.012G113500	-1.9	1.1e-13	TRUE
Potri.013G008800	-1.9	0.029	TRUE
Potri.013G100300	-1.9	0.0032	TRUE
Potri.014G008300	-1.9	1.8e-06	TRUE
Potri.015G107600	-1.9	1.4e-05	TRUE
Potri.015G111800	-1.9	5.7e-07	TRUE
Potri.015G120800	-1.9	0.0035	TRUE
Potri.016G019200	-1.9	3.6e-11	TRUE
Potri.016G101600	-1.9	0.012	TRUE
Potri.016G124900	-1.9	1.7e-11	TRUE
Potri.017G013400	-1.9	0.025	TRUE
Potri.017G039300	-1.9	0.00061	TRUE
Potri.017G050400	-1.9	0.011	TRUE
Potri.017G080800	-1.9	0.049	TRUE
Potri.017G123500	-1.9	6.6e-05	TRUE
Potri.018G006800	-1.9	2.9e-07	TRUE
Potri.018G046600	-1.9	3.3e-11	TRUE
Potri.018G098000	-1.9	2.9e-06	TRUE
Potri.019G124700	-1.9	0.0032	TRUE
Potri.019G130500	-1.9	0.0011	TRUE
Potri.T030700	-1.9	0.0066	TRUE
Potri.T083400	-1.9	0.009	TRUE
Potri.T131500	-1.9	0.0092	TRUE
Potri.T159100	-1.9	2.3e-16	TRUE
Potri.T162700	-1.9	0.00013	TRUE
Potri.T172600	-1.9	6.1e-08	TRUE
Potri.001G008100	-1.8	0.0093	TRUE
Potri.001G029700	-1.8	0.0015	TRUE
Potri.001G041800	-1.8	8.7e-12	TRUE
Potri.001G295500	-1.8	4.4e-05	TRUE
Potri.001G351200	-1.8	1.9e-19	TRUE
Potri.001G375500	-1.8	1.7e-23	TRUE
Potri.001G380000	-1.8	0.0051	TRUE
Potri.001G401600	-1.8	3.3e-17	TRUE
Potri.001G418100	-1.8	0.00048	TRUE
Potri.002G022600	-1.8	0.0013	TRUE
Potri.002G070700	-1.8	5.8e-06	TRUE
Potri.002G076500	-1.8	1.9e-06	TRUE
Potri.002G094800	-1.8	2.3e-05	TRUE
Potri.002G144600	-1.8	3.5e-26	TRUE
Potri.002G154200	-1.8	0.027	TRUE
Potri.002G162800	-1.8	5.6e-05	TRUE
Potri.002G206000	-1.8	0.00034	TRUE
Potri.003G100300	-1.8	9.1e-18	TRUE
Potri.003G215200	-1.8	2.6e-09	TRUE
Potri.004G025400	-1.8	5.3e-05	TRUE
Potri.004G066300	-1.8	1.1e-05	TRUE
Potri.004G135600	-1.8	0.014	TRUE
Potri.004G167900	-1.8	5e-09	TRUE
Potri.004G187400	-1.8	0.00042	TRUE
Potri.004G207200	-1.8	1.1e-11	TRUE
Potri.005G070900	-1.8	2.7e-11	TRUE
Potri.005G104400	-1.8	0.00036	TRUE
Potri.005G129400	-1.8	0.013	TRUE
Potri.005G177500	-1.8	1.4e-16	TRUE
Potri.005G208800	-1.8	0.00022	TRUE
Potri.005G239100	-1.8	0.00078	TRUE
Potri.005G240300	-1.8	1.3e-29	TRUE
Potri.005G242800	-1.8	0.034	TRUE
Potri.006G013900	-1.8	2.2e-08	TRUE
Potri.006G100500	-1.8	2e-31	TRUE
Potri.006G207200	-1.8	0.04	TRUE
Potri.006G214300	-1.8	0.00057	TRUE
Potri.006G245500	-1.8	0.019	TRUE
Potri.006G275000	-1.8	2.5e-14	TRUE
Potri.007G055500	-1.8	3.7e-10	TRUE
Potri.007G097000	-1.8	9e-08	TRUE
Potri.007G109700	-1.8	0.036	TRUE
Potri.008G019600	-1.8	0.04	TRUE
Potri.008G061600	-1.8	6.6e-05	TRUE
Potri.008G067500	-1.8	4.7e-17	TRUE
Potri.008G127700	-1.8	5e-13	TRUE
Potri.008G141100	-1.8	0.016	TRUE
Potri.008G155900	-1.8	2.1e-14	TRUE
Potri.008G175300	-1.8	3.9e-06	TRUE
Potri.009G008600	-1.8	1.8e-05	TRUE
Potri.009G078200	-1.8	3.1e-20	TRUE
Potri.009G099000	-1.8	4e-11	TRUE
Potri.009G102700	-1.8	2.6e-07	TRUE
Potri.010G083600	-1.8	7.9e-05	TRUE
Potri.010G147700	-1.8	2.6e-12	TRUE
Potri.010G183500	-1.8	1.8e-09	TRUE
Potri.010G187000	-1.8	0.00024	TRUE
Potri.011G009400	-1.8	0.035	TRUE
Potri.011G030500	-1.8	0.021	TRUE
Potri.011G113000	-1.8	2.2e-06	TRUE
Potri.011G165000	-1.8	0.0022	TRUE
Potri.012G038300	-1.8	7.9e-14	TRUE
Potri.012G038800	-1.8	4.3e-10	TRUE
Potri.013G036000	-1.8	4.3e-05	TRUE
Potri.013G045200	-1.8	0.00046	TRUE
Potri.013G057200	-1.8	2.1e-12	TRUE
Potri.013G103000	-1.8	0.00033	TRUE
Potri.013G125000	-1.8	8.9e-05	TRUE
Potri.013G135700	-1.8	6.7e-09	TRUE
Potri.014G006800	-1.8	0.0016	TRUE
Potri.014G028200	-1.8	2.1e-20	TRUE
Potri.014G038100	-1.8	0.038	TRUE
Potri.014G090500	-1.8	2.2e-17	TRUE
Potri.014G090700	-1.8	5.8e-05	TRUE
Potri.014G100800	-1.8	0.00034	TRUE
Potri.014G141600	-1.8	0.0013	TRUE
Potri.015G003800	-1.8	0.0035	TRUE
Potri.015G089500	-1.8	2e-11	TRUE
Potri.015G110000	-1.8	8.3e-05	TRUE
Potri.015G128200	-1.8	0.037	TRUE
Potri.016G019700	-1.8	5.1e-15	TRUE
Potri.016G079700	-1.8	5.5e-05	TRUE
Potri.017G107400	-1.8	0.026	TRUE
Potri.017G119200	-1.8	0.0021	TRUE
Potri.017G136800	-1.8	0.012	TRUE
Potri.017G147400	-1.8	1.3e-07	TRUE
Potri.019G059900	-1.8	0.042	TRUE
Potri.T053300	-1.8	0.027	TRUE
Potri.T082000	-1.8	0.011	TRUE
Potri.T097600	-1.8	1.7e-06	TRUE
Potri.T144700	-1.8	8.4e-19	TRUE
Potri.T162600	-1.8	0.0061	TRUE
Potri.001G257000	-1.7	8e-17	TRUE
Potri.001G268900	-1.7	0.018	TRUE
Potri.001G347700	-1.7	5.9e-17	TRUE
Potri.002G054400	-1.7	1e-14	TRUE
Potri.002G064600	-1.7	2.1e-08	TRUE
Potri.002G082400	-1.7	4.8e-07	TRUE
Potri.002G089800	-1.7	1.2e-18	TRUE
Potri.002G100500	-1.7	0.00074	TRUE
Potri.002G105000	-1.7	6.9e-10	TRUE
Potri.002G108500	-1.7	1.6e-23	TRUE
Potri.002G113800	-1.7	6.6e-10	TRUE
Potri.002G124000	-1.7	1.4e-14	TRUE
Potri.002G124500	-1.7	0.015	TRUE
Potri.002G131800	-1.7	0.0077	TRUE
Potri.002G156200	-1.7	4.9e-33	TRUE
Potri.003G025800	-1.7	5.5e-11	TRUE
Potri.003G079500	-1.7	1.6e-17	TRUE
Potri.003G113100	-1.7	0.016	TRUE
Potri.003G122900	-1.7	2.3e-13	TRUE
Potri.003G178200	-1.7	3.1e-23	TRUE
Potri.003G216100	-1.7	1e-10	TRUE
Potri.004G002500	-1.7	0.0039	TRUE
Potri.004G049300	-1.7	8.7e-23	TRUE
Potri.004G051200	-1.7	0.0012	TRUE
Potri.004G095200	-1.7	0.0099	TRUE
Potri.004G178500	-1.7	0.0036	TRUE
Potri.004G184000	-1.7	0.00032	TRUE
Potri.005G002400	-1.7	0.044	TRUE
Potri.005G005500	-1.7	0.0011	TRUE
Potri.005G112000	-1.7	0.0031	TRUE
Potri.005G141000	-1.7	0.019	TRUE
Potri.005G252700	-1.7	0.0026	TRUE
Potri.006G072200	-1.7	0.00034	TRUE
Potri.006G153200	-1.7	0.043	TRUE
Potri.006G246400	-1.7	3.5e-05	TRUE
Potri.006G251000	-1.7	0.02	TRUE
Potri.007G023600	-1.7	4.2e-11	TRUE
Potri.007G070900	-1.7	0.0023	TRUE
Potri.007G132600	-1.7	0.0086	TRUE
Potri.008G028200	-1.7	0.044	TRUE
Potri.008G059800	-1.7	1.1e-06	TRUE
Potri.008G065600	-1.7	7.5e-10	TRUE
Potri.008G085000	-1.7	2e-15	TRUE
Potri.008G195400	-1.7	8.5e-06	TRUE
Potri.009G027200	-1.7	0.0012	TRUE
Potri.009G096000	-1.7	2.6e-08	TRUE
Potri.009G097400	-1.7	0.0052	TRUE
Potri.009G145400	-1.7	0.011	TRUE
Potri.010G081100	-1.7	2.3e-05	TRUE
Potri.010G177700	-1.7	1.3e-11	TRUE
Potri.011G003100	-1.7	0.0022	TRUE
Potri.011G044100	-1.7	7.6e-17	TRUE
Potri.011G062000	-1.7	0.028	TRUE
Potri.011G094800	-1.7	1.7e-07	TRUE
Potri.011G106400	-1.7	1.3e-08	TRUE
Potri.011G130500	-1.7	1.4e-05	TRUE
Potri.012G001400	-1.7	3.9e-19	TRUE
Potri.012G017100	-1.7	1.2e-09	TRUE
Potri.012G031100	-1.7	2.1e-11	TRUE
Potri.012G032900	-1.7	2.8e-12	TRUE
Potri.012G047100	-1.7	5.6e-09	TRUE
Potri.012G047600	-1.7	0.011	TRUE
Potri.012G084700	-1.7	8.6e-10	TRUE
Potri.012G131300	-1.7	3.1e-12	TRUE
Potri.012G133500	-1.7	2e-09	TRUE
Potri.013G053300	-1.7	4.7e-05	TRUE
Potri.013G054000	-1.7	2.8e-07	TRUE
Potri.013G078500	-1.7	7.8e-06	TRUE
Potri.013G122800	-1.7	2.7e-05	TRUE
Potri.013G131500	-1.7	0.0011	TRUE
Potri.013G131700	-1.7	0.00014	TRUE
Potri.014G013400	-1.7	6.9e-07	TRUE
Potri.014G015300	-1.7	0.0011	TRUE
Potri.014G077900	-1.7	3.2e-08	TRUE
Potri.014G132600	-1.7	6e-05	TRUE
Potri.015G048700	-1.7	1.8e-21	TRUE
Potri.015G054600	-1.7	0.0004	TRUE
Potri.015G128300	-1.7	4.4e-06	TRUE
Potri.017G004800	-1.7	0.043	TRUE
Potri.017G047100	-1.7	0.0002	TRUE
Potri.017G047200	-1.7	0.0031	TRUE
Potri.017G106400	-1.7	1.2e-30	TRUE
Potri.018G019700	-1.7	0.019	TRUE
Potri.018G065600	-1.7	0.0017	TRUE
Potri.018G138300	-1.7	0.0096	TRUE
Potri.019G037300	-1.7	1.5e-08	TRUE
Potri.019G038300	-1.7	0.0033	TRUE
Potri.019G094000	-1.7	0.0071	TRUE
Potri.T043800	-1.7	0.0047	TRUE
Potri.T050600	-1.7	0.0016	TRUE
Potri.T181600	-1.7	7e-08	TRUE
Potri.001G037100	-1.6	0.0043	TRUE
Potri.001G105900	-1.6	1e-17	TRUE
Potri.001G193200	-1.6	0.00056	TRUE
Potri.001G205800	-1.6	2.7e-22	TRUE
Potri.001G263400	-1.6	1.5e-06	TRUE
Potri.001G278500	-1.6	6.1e-05	TRUE
Potri.001G303800	-1.6	0.0019	TRUE
Potri.001G316300	-1.6	3.2e-06	TRUE
Potri.001G325100	-1.6	1.1e-09	TRUE
Potri.001G327800	-1.6	1.1e-06	TRUE
Potri.001G355000	-1.6	7.3e-05	TRUE
Potri.001G395100	-1.6	2.4e-05	TRUE
Potri.001G409500	-1.6	9.5e-05	TRUE
Potri.001G414300	-1.6	0.01	TRUE
Potri.001G415200	-1.6	0.00025	TRUE
Potri.002G002100	-1.6	0.00028	TRUE
Potri.002G019700	-1.6	7.5e-09	TRUE
Potri.002G064500	-1.6	2.5e-12	TRUE
Potri.002G074700	-1.6	1.8e-11	TRUE
Potri.002G106300	-1.6	1.3e-20	TRUE
Potri.002G115900	-1.6	0.00064	TRUE
Potri.002G125400	-1.6	1.2e-21	TRUE
Potri.002G140800	-1.6	0.00025	TRUE
Potri.002G142800	-1.6	1.7e-06	TRUE
Potri.002G147900	-1.6	0.028	TRUE
Potri.002G148400	-1.6	1.7e-10	TRUE
Potri.002G156300	-1.6	0.00061	TRUE
Potri.002G156600	-1.6	0.00011	TRUE
Potri.002G190400	-1.6	5.7e-22	TRUE
Potri.002G230300	-1.6	0.0037	TRUE
Potri.003G068300	-1.6	0.0014	TRUE
Potri.003G096100	-1.6	1.8e-17	TRUE
Potri.003G100400	-1.6	2.7e-08	TRUE
Potri.003G133200	-1.6	0.00083	TRUE
Potri.003G192200	-1.6	9.9e-15	TRUE
Potri.003G207000	-1.6	5.6e-05	TRUE
Potri.003G218400	-1.6	1.1e-06	TRUE
Potri.004G015900	-1.6	0.00083	TRUE
Potri.004G021500	-1.6	4.9e-12	TRUE
Potri.004G035800	-1.6	2.4e-19	TRUE
Potri.004G044000	-1.6	1.8e-08	TRUE
Potri.004G065000	-1.6	0.014	TRUE
Potri.004G083900	-1.6	0.023	TRUE
Potri.004G125400	-1.6	3.5e-12	TRUE
Potri.004G146000	-1.6	7.6e-05	TRUE
Potri.004G168900	-1.6	4.2e-25	TRUE
Potri.004G175400	-1.6	1.6e-12	TRUE
Potri.005G007900	-1.6	0.027	TRUE
Potri.005G011200	-1.6	3.1e-14	TRUE
Potri.005G063700	-1.6	0.0005	TRUE
Potri.005G109200	-1.6	7.5e-05	TRUE
Potri.005G139200	-1.6	0.00031	TRUE
Potri.005G181200	-1.6	0.0054	TRUE
Potri.005G184100	-1.6	0.0002	TRUE
Potri.005G208200	-1.6	2.2e-13	TRUE
Potri.005G246000	-1.6	1.7e-14	TRUE
Potri.006G014500	-1.6	1.2e-11	TRUE
Potri.006G034000	-1.6	0.0016	TRUE
Potri.006G089400	-1.6	0.0059	TRUE
Potri.006G092200	-1.6	0.0029	TRUE
Potri.006G101500	-1.6	2.1e-06	TRUE
Potri.006G169000	-1.6	0.014	TRUE
Potri.006G217000	-1.6	1.4e-20	TRUE
Potri.006G260000	-1.6	3.4e-14	TRUE
Potri.007G008200	-1.6	3e-13	TRUE
Potri.007G067600	-1.6	0.0076	TRUE
Potri.007G076800	-1.6	0.0013	TRUE
Potri.008G003300	-1.6	6e-12	TRUE
Potri.008G017100	-1.6	3.3e-07	TRUE
Potri.008G024100	-1.6	5.5e-20	TRUE
Potri.008G036900	-1.6	1.7e-10	TRUE
Potri.008G074500	-1.6	2.3e-16	TRUE
Potri.008G121000	-1.6	8.3e-18	TRUE
Potri.008G157900	-1.6	0.0017	TRUE
Potri.008G164400	-1.6	2.7e-09	TRUE
Potri.009G006400	-1.6	8.3e-06	TRUE
Potri.009G024300	-1.6	0.012	TRUE
Potri.009G046200	-1.6	2.4e-08	TRUE
Potri.009G069400	-1.6	7.7e-07	TRUE
Potri.009G117300	-1.6	8.8e-06	TRUE
Potri.009G163700	-1.6	1.5e-31	TRUE
Potri.010G157900	-1.6	1.8e-14	TRUE
Potri.010G195700	-1.6	0.0039	TRUE
Potri.010G202400	-1.6	1.6e-16	TRUE
Potri.010G206600	-1.6	3.6e-12	TRUE
Potri.010G234700	-1.6	1.6e-13	TRUE
Potri.011G013700	-1.6	0.043	TRUE
Potri.011G028500	-1.6	0.026	TRUE
Potri.011G044700	-1.6	7.7e-08	TRUE
Potri.011G057000	-1.6	3.5e-07	TRUE
Potri.011G061700	-1.6	1.8e-11	TRUE
Potri.011G113100	-1.6	0.013	TRUE
Potri.011G120800	-1.6	4.1e-12	TRUE
Potri.011G123500	-1.6	5.1e-15	TRUE
Potri.011G126300	-1.6	1.5e-08	TRUE
Potri.011G129000	-1.6	3.6e-06	TRUE
Potri.012G060600	-1.6	9.8e-33	TRUE
Potri.013G020200	-1.6	1.5e-06	TRUE
Potri.013G055600	-1.6	0.0011	TRUE
Potri.013G055800	-1.6	4.2e-10	TRUE
Potri.013G061200	-1.6	5.4e-18	TRUE
Potri.013G121900	-1.6	0.0037	TRUE
Potri.014G017300	-1.6	0.015	TRUE
Potri.014G180600	-1.6	7e-22	TRUE
Potri.015G023900	-1.6	0.014	TRUE
Potri.015G029100	-1.6	1.2e-10	TRUE
Potri.015G054300	-1.6	6.2e-12	TRUE
Potri.015G076400	-1.6	8.7e-08	TRUE
Potri.015G089200	-1.6	9.3e-09	TRUE
Potri.015G128700	-1.6	0.00062	TRUE
Potri.016G126100	-1.6	9.3e-11	TRUE
Potri.017G018200	-1.6	0.00016	TRUE
Potri.017G076400	-1.6	4e-13	TRUE
Potri.017G135000	-1.6	0.025	TRUE
Potri.017G146600	-1.6	7.6e-06	TRUE
Potri.018G041400	-1.6	7.3e-05	TRUE
Potri.018G118300	-1.6	9.2e-06	TRUE
Potri.018G122800	-1.6	1.4e-05	TRUE
Potri.019G011800	-1.6	0.044	TRUE
Potri.019G117500	-1.6	5.8e-05	TRUE
Potri.019G120400	-1.6	0.021	TRUE
Potri.019G122100	-1.6	0.00064	TRUE
Potri.T031300	-1.6	0.027	TRUE
Potri.T097400	-1.6	0.045	TRUE
Potri.T099800	-1.6	0.0067	TRUE
Potri.T111200	-1.6	0.049	TRUE
Potri.T138200	-1.6	0.004	TRUE
Potri.T148000	-1.6	5.9e-05	TRUE
Potri.001G017500	-1.5	4.6e-08	TRUE
Potri.001G019100	-1.5	2e-13	TRUE
Potri.001G058500	-1.5	4.1e-07	TRUE
Potri.001G062500	-1.5	0.005	TRUE
Potri.001G078300	-1.5	1.6e-05	TRUE
Potri.001G156700	-1.5	0.0031	TRUE
Potri.001G190700	-1.5	8.1e-05	TRUE
Potri.001G248100	-1.5	1.6e-12	TRUE
Potri.001G279800	-1.5	0.00076	TRUE
Potri.001G321800	-1.5	6.5e-07	TRUE
Potri.001G330000	-1.5	0.0046	TRUE
Potri.001G380800	-1.5	0.00023	TRUE
Potri.001G410100	-1.5	4.6e-15	TRUE
Potri.001G411400	-1.5	0.004	TRUE
Potri.001G412900	-1.5	0.0067	TRUE
Potri.001G430600	-1.5	0.003	TRUE
Potri.001G456000	-1.5	0.0033	TRUE
Potri.002G050800	-1.5	0.00034	TRUE
Potri.002G061000	-1.5	4.1e-23	TRUE
Potri.002G072200	-1.5	8.9e-05	TRUE
Potri.002G081400	-1.5	3.6e-15	TRUE
Potri.002G095400	-1.5	0.00028	TRUE
Potri.002G099300	-1.5	4.1e-05	TRUE
Potri.002G126300	-1.5	0.00034	TRUE
Potri.002G167100	-1.5	4.7e-18	TRUE
Potri.002G179800	-1.5	7.1e-07	TRUE
Potri.002G182500	-1.5	1.2e-09	TRUE
Potri.002G184200	-1.5	4.3e-10	TRUE
Potri.002G191800	-1.5	0.023	TRUE
Potri.002G201500	-1.5	2.2e-14	TRUE
Potri.002G208900	-1.5	0.024	TRUE
Potri.003G073300	-1.5	0.00053	TRUE
Potri.003G091400	-1.5	4.1e-06	TRUE
Potri.003G103900	-1.5	8.7e-05	TRUE
Potri.003G112400	-1.5	1.4e-14	TRUE
Potri.003G123700	-1.5	1.2e-11	TRUE
Potri.003G146400	-1.5	4.1e-09	TRUE
Potri.003G202500	-1.5	2.6e-11	TRUE
Potri.004G009900	-1.5	0.047	TRUE
Potri.004G051800	-1.5	0.0016	TRUE
Potri.004G169000	-1.5	7.8e-08	TRUE
Potri.004G234300	-1.5	5.5e-09	TRUE
Potri.005G009100	-1.5	0.032	TRUE
Potri.005G072800	-1.5	1.2e-16	TRUE
Potri.005G073100	-1.5	3.1e-06	TRUE
Potri.005G115900	-1.5	1.3e-14	TRUE
Potri.005G174400	-1.5	1.6e-11	TRUE
Potri.005G186500	-1.5	1.5e-17	TRUE
Potri.005G199900	-1.5	0.0035	TRUE
Potri.005G246100	-1.5	0.00019	TRUE
Potri.005G250700	-1.5	7.9e-08	TRUE
Potri.005G251300	-1.5	4e-06	TRUE
Potri.006G015000	-1.5	9.2e-07	TRUE
Potri.006G015200	-1.5	5.1e-07	TRUE
Potri.006G022300	-1.5	0.0015	TRUE
Potri.006G055800	-1.5	0.0014	TRUE
Potri.006G064400	-1.5	7.2e-09	TRUE
Potri.006G085200	-1.5	0.00039	TRUE
Potri.006G086900	-1.5	3.4e-07	TRUE
Potri.006G140900	-1.5	2.5e-05	TRUE
Potri.006G230200	-1.5	5e-09	TRUE
Potri.006G231100	-1.5	1.1e-06	TRUE
Potri.006G245400	-1.5	6.9e-11	TRUE
Potri.006G266800	-1.5	1.3e-09	TRUE
Potri.007G015500	-1.5	0.033	TRUE
Potri.007G038500	-1.5	0.00018	TRUE
Potri.007G074000	-1.5	2.1e-10	TRUE
Potri.007G097400	-1.5	0.0035	TRUE
Potri.007G138100	-1.5	0.023	TRUE
Potri.008G045500	-1.5	4.7e-05	TRUE
Potri.008G080800	-1.5	3.2e-23	TRUE
Potri.008G121900	-1.5	3.9e-08	TRUE
Potri.008G133100	-1.5	0.00014	TRUE
Potri.008G159000	-1.5	0.00013	TRUE
Potri.009G012400	-1.5	1.3e-07	TRUE
Potri.009G027100	-1.5	1.2e-05	TRUE
Potri.009G041700	-1.5	1.2e-10	TRUE
Potri.009G081400	-1.5	1.9e-06	TRUE
Potri.009G082600	-1.5	0.0077	TRUE
Potri.009G089400	-1.5	3.2e-06	TRUE
Potri.009G151600	-1.5	9.4e-13	TRUE
Potri.009G159000	-1.5	1.5e-22	TRUE
Potri.010G074300	-1.5	1.1e-09	TRUE
Potri.010G096800	-1.5	1.5e-05	TRUE
Potri.010G118000	-1.5	1.2e-09	TRUE
Potri.010G131900	-1.5	9.6e-05	TRUE
Potri.010G175200	-1.5	0.0082	TRUE
Potri.010G200900	-1.5	0.0061	TRUE
Potri.010G213500	-1.5	0.0039	TRUE
Potri.010G217700	-1.5	0.0061	TRUE
Potri.010G248400	-1.5	0.0016	TRUE
Potri.011G033200	-1.5	1.9e-05	TRUE
Potri.011G035900	-1.5	0.0012	TRUE
Potri.011G036400	-1.5	0.016	TRUE
Potri.011G053300	-1.5	0.031	TRUE
Potri.011G055900	-1.5	1.7e-06	TRUE
Potri.011G094400	-1.5	4.2e-06	TRUE
Potri.011G151600	-1.5	8.6e-09	TRUE
Potri.012G054700	-1.5	0.0015	TRUE
Potri.012G055600	-1.5	0.00022	TRUE
Potri.013G000200	-1.5	1.8e-11	TRUE
Potri.013G062200	-1.5	0.00072	TRUE
Potri.013G089200	-1.5	0.024	TRUE
Potri.013G117000	-1.5	0.011	TRUE
Potri.013G131600	-1.5	1.8e-16	TRUE
Potri.014G041500	-1.5	0.002	TRUE
Potri.014G086300	-1.5	1.7e-10	TRUE
Potri.014G089300	-1.5	2.5e-11	TRUE
Potri.014G093300	-1.5	0.043	TRUE
Potri.014G122100	-1.5	0.038	TRUE
Potri.014G149300	-1.5	0.036	TRUE
Potri.014G162400	-1.5	1.9e-06	TRUE
Potri.014G170400	-1.5	3.4e-07	TRUE
Potri.014G179400	-1.5	0.017	TRUE
Potri.015G004500	-1.5	7.3e-05	TRUE
Potri.015G114500	-1.5	0.0051	TRUE
Potri.015G117000	-1.5	0.0074	TRUE
Potri.015G126900	-1.5	1.4e-06	TRUE
Potri.015G146400	-1.5	5.3e-09	TRUE
Potri.016G015600	-1.5	0.049	TRUE
Potri.016G054400	-1.5	3.7e-10	TRUE
Potri.016G055300	-1.5	0.00041	TRUE
Potri.016G057400	-1.5	0.0077	TRUE
Potri.016G089500	-1.5	0.014	TRUE
Potri.016G138500	-1.5	2e-06	TRUE
Potri.017G083700	-1.5	0.0006	TRUE
Potri.017G084600	-1.5	1.6e-16	TRUE
Potri.017G122400	-1.5	1.2e-09	TRUE
Potri.017G142400	-1.5	2.1e-16	TRUE
Potri.018G019800	-1.5	4.5e-06	TRUE
Potri.018G031100	-1.5	3.6e-06	TRUE
Potri.018G059800	-1.5	2.5e-07	TRUE
Potri.018G078800	-1.5	0.00017	TRUE
Potri.018G094900	-1.5	1.2e-05	TRUE
Potri.018G110800	-1.5	8.2e-07	TRUE
Potri.018G119600	-1.5	0.00027	TRUE
Potri.018G121100	-1.5	0.028	TRUE
Potri.018G127800	-1.5	4e-06	TRUE
Potri.018G148800	-1.5	5.6e-12	TRUE
Potri.019G003800	-1.5	0.00031	TRUE
Potri.019G051000	-1.5	0.025	TRUE
Potri.019G071200	-1.5	0.0078	TRUE
Potri.019G081200	-1.5	1.1e-06	TRUE
Potri.019G082700	-1.5	0.0042	TRUE
Potri.019G093900	-1.5	0.019	TRUE
Potri.019G116000	-1.5	0.022	TRUE
Potri.019G118400	-1.5	1.5e-05	TRUE
Potri.019G123500	-1.5	4.3e-18	TRUE
Potri.T070000	-1.5	0.00081	TRUE
Potri.T142400	-1.5	2.3e-07	TRUE
Potri.T149100	-1.5	0.013	TRUE
Potri.001G020900	-1.4	0.00094	TRUE
Potri.001G070800	-1.4	2.5e-12	TRUE
Potri.001G097700	-1.4	7.6e-30	TRUE
Potri.001G133200	-1.4	4.2e-07	TRUE
Potri.001G160100	-1.4	6.2e-15	TRUE
Potri.001G167100	-1.4	1.2e-07	TRUE
Potri.001G185200	-1.4	0.0052	TRUE
Potri.001G234700	-1.4	0.0088	TRUE
Potri.001G326300	-1.4	0.013	TRUE
Potri.001G385600	-1.4	4.4e-09	TRUE
Potri.001G408900	-1.4	0.041	TRUE
Potri.001G440900	-1.4	1.7e-06	TRUE
Potri.002G019600	-1.4	0.0048	TRUE
Potri.002G042100	-1.4	1.7e-07	TRUE
Potri.002G094900	-1.4	2.2e-07	TRUE
Potri.002G099700	-1.4	5.9e-09	TRUE
Potri.002G139800	-1.4	0.00082	TRUE
Potri.002G227300	-1.4	0.021	TRUE
Potri.002G240800	-1.4	6.1e-09	TRUE
Potri.002G241700	-1.4	5.1e-09	TRUE
Potri.003G059900	-1.4	0.0016	TRUE
Potri.003G060000	-1.4	0.0024	TRUE
Potri.003G130500	-1.4	2.7e-12	TRUE
Potri.003G142500	-1.4	2.3e-06	TRUE
Potri.003G148900	-1.4	0.00018	TRUE
Potri.003G159800	-1.4	0.00019	TRUE
Potri.004G024500	-1.4	0.00065	TRUE
Potri.004G033300	-1.4	1.5e-05	TRUE
Potri.004G094600	-1.4	3.8e-10	TRUE
Potri.004G149000	-1.4	0.0018	TRUE
Potri.004G163300	-1.4	8.9e-12	TRUE
Potri.004G172300	-1.4	8.1e-06	TRUE
Potri.004G178600	-1.4	8.9e-06	TRUE
Potri.004G209700	-1.4	6.9e-08	TRUE
Potri.004G233900	-1.4	1.6e-11	TRUE
Potri.005G024600	-1.4	5.9e-11	TRUE
Potri.005G069500	-1.4	1.5e-08	TRUE
Potri.005G092200	-1.4	0.0002	TRUE
Potri.005G133200	-1.4	0.0071	TRUE
Potri.005G140900	-1.4	5.3e-11	TRUE
Potri.005G157300	-1.4	6.2e-06	TRUE
Potri.006G007900	-1.4	1.4e-06	TRUE
Potri.006G060800	-1.4	3.8e-11	TRUE
Potri.006G066600	-1.4	0.00095	TRUE
Potri.006G072900	-1.4	8.5e-13	TRUE
Potri.006G127900	-1.4	0.0001	TRUE
Potri.006G181200	-1.4	0.019	TRUE
Potri.006G198600	-1.4	1.4e-12	TRUE
Potri.006G199900	-1.4	3.7e-09	TRUE
Potri.006G209700	-1.4	0.00011	TRUE
Potri.006G215000	-1.4	7.3e-08	TRUE
Potri.006G251800	-1.4	5.1e-11	TRUE
Potri.007G096500	-1.4	0.0061	TRUE
Potri.007G105800	-1.4	0.019	TRUE
Potri.007G122600	-1.4	3.6e-14	TRUE
Potri.007G140800	-1.4	0.001	TRUE
Potri.008G058200	-1.4	8.7e-05	TRUE
Potri.008G069500	-1.4	0.00035	TRUE
Potri.008G092900	-1.4	0.0018	TRUE
Potri.008G100700	-1.4	2.5e-12	TRUE
Potri.008G127600	-1.4	1.1e-08	TRUE
Potri.008G179400	-1.4	2.7e-07	TRUE
Potri.009G010900	-1.4	4.3e-06	TRUE
Potri.009G022000	-1.4	4.7e-05	TRUE
Potri.009G102000	-1.4	9.7e-29	TRUE
Potri.009G109700	-1.4	0.048	TRUE
Potri.009G135200	-1.4	2e-05	TRUE
Potri.009G163600	-1.4	1.2e-13	TRUE
Potri.010G009100	-1.4	0.042	TRUE
Potri.010G035100	-1.4	2.1e-18	TRUE
Potri.010G063800	-1.4	0.00037	TRUE
Potri.010G095200	-1.4	7.4e-05	TRUE
Potri.010G146900	-1.4	1.2e-09	TRUE
Potri.010G182500	-1.4	4.4e-05	TRUE
Potri.010G194600	-1.4	4.2e-16	TRUE
Potri.010G225300	-1.4	7.7e-11	TRUE
Potri.010G228400	-1.4	0.011	TRUE
Potri.011G126400	-1.4	4.3e-05	TRUE
Potri.012G014700	-1.4	0.00052	TRUE
Potri.012G023300	-1.4	1.6e-09	TRUE
Potri.012G032300	-1.4	9.7e-09	TRUE
Potri.012G032700	-1.4	0.023	TRUE
Potri.012G090900	-1.4	0.0021	TRUE
Potri.013G009000	-1.4	1.4e-06	TRUE
Potri.013G023200	-1.4	4.5e-09	TRUE
Potri.013G049200	-1.4	7.9e-05	TRUE
Potri.013G065900	-1.4	2.2e-07	TRUE
Potri.013G144000	-1.4	3.6e-13	TRUE
Potri.014G106800	-1.4	4.1e-10	TRUE
Potri.014G115500	-1.4	3.7e-17	TRUE
Potri.014G146800	-1.4	0.043	TRUE
Potri.015G003900	-1.4	0.0026	TRUE
Potri.015G011300	-1.4	3.6e-20	TRUE
Potri.015G081300	-1.4	0.00094	TRUE
Potri.015G082900	-1.4	0.00031	TRUE
Potri.015G108600	-1.4	2.2e-08	TRUE
Potri.015G144700	-1.4	1.6e-06	TRUE
Potri.016G019400	-1.4	0.002	TRUE
Potri.016G047900	-1.4	0.0022	TRUE
Potri.016G066100	-1.4	4.6e-11	TRUE
Potri.016G071600	-1.4	2.9e-06	TRUE
Potri.016G089400	-1.4	0.0026	TRUE
Potri.016G109700	-1.4	4e-14	TRUE
Potri.017G006800	-1.4	7.1e-14	TRUE
Potri.017G017300	-1.4	6.5e-05	TRUE
Potri.017G046800	-1.4	0.0018	TRUE
Potri.017G153300	-1.4	0.0006	TRUE
Potri.019G015500	-1.4	0.042	TRUE
Potri.019G018500	-1.4	2.7e-12	TRUE
Potri.019G050900	-1.4	6e-06	TRUE
Potri.019G055800	-1.4	1.5e-06	TRUE
Potri.019G108800	-1.4	0.00015	TRUE
Potri.T045400	-1.4	0.047	TRUE
Potri.T082100	-1.4	2.3e-11	TRUE
Potri.T091700	-1.4	0.0014	TRUE
Potri.T155200	-1.4	2.6e-05	TRUE
Potri.T168700	-1.4	0.012	TRUE
Potri.T175200	-1.4	0.0044	TRUE
Potri.T178800	-1.4	0.0021	TRUE
Potri.001G020800	-1.3	1.8e-05	TRUE
Potri.001G060600	-1.3	0.014	TRUE
Potri.001G078200	-1.3	0.01	TRUE
Potri.001G084000	-1.3	4.6e-06	TRUE
Potri.001G112100	-1.3	0.00026	TRUE
Potri.001G128200	-1.3	1.7e-13	TRUE
Potri.001G145900	-1.3	2.3e-06	TRUE
Potri.001G242900	-1.3	3e-05	TRUE
Potri.001G335200	-1.3	0.011	TRUE
Potri.001G430100	-1.3	0.0016	TRUE
Potri.001G434100	-1.3	0.02	TRUE
Potri.001G435900	-1.3	5.9e-08	TRUE
Potri.001G456400	-1.3	1.4e-09	TRUE
Potri.001G459700	-1.3	5e-09	TRUE
Potri.002G009700	-1.3	2.3e-08	TRUE
Potri.002G042200	-1.3	0.0047	TRUE
Potri.002G054900	-1.3	0.00051	TRUE
Potri.002G117800	-1.3	3.8e-06	TRUE
Potri.002G157400	-1.3	1.6e-13	TRUE
Potri.002G185400	-1.3	3.8e-13	TRUE
Potri.002G209900	-1.3	1.9e-08	TRUE
Potri.002G230200	-1.3	0.018	TRUE
Potri.002G254800	-1.3	6.7e-06	TRUE
Potri.003G015200	-1.3	0.0069	TRUE
Potri.003G167800	-1.3	5.3e-09	TRUE
Potri.003G200600	-1.3	5.7e-12	TRUE
Potri.003G200700	-1.3	0.001	TRUE
Potri.004G005900	-1.3	1.7e-28	TRUE
Potri.004G036500	-1.3	1.6e-08	TRUE
Potri.004G044200	-1.3	8.2e-09	TRUE
Potri.004G049200	-1.3	0.011	TRUE
Potri.004G063000	-1.3	2.2e-07	TRUE
Potri.004G074300	-1.3	4.4e-10	TRUE
Potri.004G084500	-1.3	0.023	TRUE
Potri.004G103100	-1.3	0.0028	TRUE
Potri.004G124200	-1.3	0.011	TRUE
Potri.004G156200	-1.3	6.1e-11	TRUE
Potri.005G001800	-1.3	2.2e-06	TRUE
Potri.005G027800	-1.3	0.032	TRUE
Potri.005G062900	-1.3	2.2e-12	TRUE
Potri.005G068600	-1.3	0.0033	TRUE
Potri.005G100700	-1.3	0.00026	TRUE
Potri.005G111400	-1.3	3e-07	TRUE
Potri.005G177700	-1.3	0.005	TRUE
Potri.005G178000	-1.3	2.9e-06	TRUE
Potri.005G185700	-1.3	3.7e-13	TRUE
Potri.005G216100	-1.3	1.5e-09	TRUE
Potri.005G232900	-1.3	2.2e-15	TRUE
Potri.005G237600	-1.3	2.5e-06	TRUE
Potri.005G248100	-1.3	1.3e-25	TRUE
Potri.006G005600	-1.3	4e-05	TRUE
Potri.006G015300	-1.3	0.00015	TRUE
Potri.006G024300	-1.3	0.0057	TRUE
Potri.006G127000	-1.3	1.3e-07	TRUE
Potri.006G173600	-1.3	2.1e-07	TRUE
Potri.006G191700	-1.3	0.00075	TRUE
Potri.006G196900	-1.3	0.00017	TRUE
Potri.006G219100	-1.3	0.00056	TRUE
Potri.006G229900	-1.3	2.3e-09	TRUE
Potri.006G241600	-1.3	7.7e-08	TRUE
Potri.006G248300	-1.3	0.00082	TRUE
Potri.006G250100	-1.3	3e-06	TRUE
Potri.006G268000	-1.3	6.5e-06	TRUE
Potri.007G029400	-1.3	8.1e-11	TRUE
Potri.007G098000	-1.3	0.039	TRUE
Potri.007G103600	-1.3	1.7e-06	TRUE
Potri.008G020400	-1.3	4.4e-15	TRUE
Potri.008G024400	-1.3	0.047	TRUE
Potri.008G048200	-1.3	5.5e-11	TRUE
Potri.008G060200	-1.3	0.036	TRUE
Potri.008G073600	-1.3	1.3e-10	TRUE
Potri.008G102700	-1.3	2e-19	TRUE
Potri.008G119700	-1.3	6.6e-13	TRUE
Potri.008G151100	-1.3	0.011	TRUE
Potri.008G157800	-1.3	0.0059	TRUE
Potri.008G187900	-1.3	5e-08	TRUE
Potri.009G039200	-1.3	1.5e-05	TRUE
Potri.009G082300	-1.3	1.4e-07	TRUE
Potri.009G142200	-1.3	0.0063	TRUE
Potri.009G147900	-1.3	7.9e-08	TRUE
Potri.010G006600	-1.3	3.6e-12	TRUE
Potri.010G089300	-1.3	0.00058	TRUE
Potri.010G119700	-1.3	3.2e-08	TRUE
Potri.010G127000	-1.3	2.6e-05	TRUE
Potri.010G151500	-1.3	4.7e-19	TRUE
Potri.010G151700	-1.3	7e-07	TRUE
Potri.010G183100	-1.3	3.5e-06	TRUE
Potri.010G198200	-1.3	0.044	TRUE
Potri.010G209900	-1.3	3.5e-05	TRUE
Potri.010G222700	-1.3	0.0019	TRUE
Potri.010G223400	-1.3	0.00024	TRUE
Potri.010G224800	-1.3	4.6e-07	TRUE
Potri.010G225600	-1.3	4e-05	TRUE
Potri.011G003300	-1.3	5e-16	TRUE
Potri.011G049600	-1.3	3.3e-06	TRUE
Potri.011G064400	-1.3	0.00044	TRUE
Potri.011G115100	-1.3	0.00026	TRUE
Potri.011G118900	-1.3	0.00039	TRUE
Potri.011G144900	-1.3	1e-06	TRUE
Potri.012G006800	-1.3	4.5e-05	TRUE
Potri.012G036000	-1.3	0.01	TRUE
Potri.012G105100	-1.3	0.043	TRUE
Potri.012G134000	-1.3	0.018	TRUE
Potri.013G012200	-1.3	5.5e-06	TRUE
Potri.013G015500	-1.3	3.8e-13	TRUE
Potri.013G054200	-1.3	0.0023	TRUE
Potri.013G066000	-1.3	2.8e-14	TRUE
Potri.013G072100	-1.3	8.2e-10	TRUE
Potri.013G072200	-1.3	7.1e-23	TRUE
Potri.013G083500	-1.3	0.00044	TRUE
Potri.013G111900	-1.3	1.7e-07	TRUE
Potri.013G153400	-1.3	1.1e-14	TRUE
Potri.014G041600	-1.3	4.7e-13	TRUE
Potri.014G046300	-1.3	0.0022	TRUE
Potri.014G111800	-1.3	0.043	TRUE
Potri.014G117200	-1.3	0.0079	TRUE
Potri.015G024200	-1.3	0.018	TRUE
Potri.015G085300	-1.3	3.2e-07	TRUE
Potri.016G064600	-1.3	2.3e-27	TRUE
Potri.016G126700	-1.3	1.1e-05	TRUE
Potri.016G142200	-1.3	0.00041	TRUE
Potri.017G014200	-1.3	0.001	TRUE
Potri.017G032300	-1.3	0.043	TRUE
Potri.017G132500	-1.3	0.00094	TRUE
Potri.017G135600	-1.3	1.2e-10	TRUE
Potri.017G137300	-1.3	1.5e-08	TRUE
Potri.018G008700	-1.3	5e-07	TRUE
Potri.018G118200	-1.3	0.00035	TRUE
Potri.018G129500	-1.3	6.9e-18	TRUE
Potri.018G130800	-1.3	2e-09	TRUE
Potri.019G017700	-1.3	8.2e-14	TRUE
Potri.019G032900	-1.3	2.8e-08	TRUE
Potri.019G083600	-1.3	0.003	TRUE
Potri.019G083800	-1.3	0.0027	TRUE
Potri.019G102200	-1.3	0.00078	TRUE
Potri.019G120500	-1.3	0.045	TRUE
Potri.019G121600	-1.3	0.00015	TRUE
Potri.019G127900	-1.3	4.8e-13	TRUE
Potri.T085700	-1.3	0.033	TRUE
Potri.T128300	-1.3	0.00022	TRUE
Potri.T151700	-1.3	0.012	TRUE
Potri.T156600	-1.3	0.02	TRUE
Potri.T180000	-1.3	4e-05	TRUE
Potri.001G028900	-1.2	0.044	TRUE
Potri.001G068200	-1.2	8.7e-05	TRUE
Potri.001G088700	-1.2	0.0058	TRUE
Potri.001G092600	-1.2	2.7e-08	TRUE
Potri.001G097600	-1.2	3.8e-05	TRUE
Potri.001G146200	-1.2	3.8e-05	TRUE
Potri.001G210100	-1.2	6.6e-06	TRUE
Potri.001G250100	-1.2	0.00074	TRUE
Potri.001G252200	-1.2	0.036	TRUE
Potri.001G253300	-1.2	1.3e-05	TRUE
Potri.001G279300	-1.2	2e-13	TRUE
[truncated: 10,375 more rows]

## Sheet: Top_LFC
Gene_ID		Log2FC	P-adj	Sig	Gene Annotation	Comments
LEAF
Potri.013G082600		15	1e-11	TRUE	Phosphorylase superfamily protein	Methionine and cysteine metabolism, possibly related to adenine again
Potri.013G082700		13	4.6e-15	TRUE	Phosphorylase superfamily protein	Methionine and cysteine metabolism, possibly related to adenine again
Potri.013G080300		12	4.7e-25	TRUE	Phosphorylase superfamily protein	Methionine and cysteine metabolism, possibly related to adenine again
Potri.013G080500		12	1.2e-21	TRUE	Phosphorylase superfamily protein	Methionine and cysteine metabolism, possibly related to adenine again
Potri.013G082800		12	3.1e-25	TRUE	Phosphorylase superfamily protein	Methionine and cysteine metabolism, possibly related to adenine again
Potri.019G050200		12	4.6e-40	TRUE	Phosphorylase superfamily protein	Methionine and cysteine metabolism, possibly related to adenine again
Potri.001G223900		-12	6.3e-07	TRUE	beta glucosidase 27	Hydrolyzes lignin precursors
Potri.004G148900		-12	8.1e-09	TRUE	allene oxide synthase	Jasmonate synthesis
Potri.008G037600		-12	9.1e-07	TRUE	Acyl-CoA N-acyltransferases (NAT) superfamily protein	Polyamines upregulated in stress, crosstalk with hormones (incl. ABA)
Potri.011G159800		-12	1.4e-06	TRUE	FAD-binding Berberine family protein	Secondary metabolism
Potri.011G159900		-12	1.6e-06	TRUE	Berberine bridge enzyme	Carbohydrate/alkaloid metabolism, defense
Potri.011G160000		-12	2.8e-06	TRUE	Berberine bridge enzyme	Carbohydrate/alkaloid metabolism, defense
Potri.T140100		-12	2.6e-07	TRUE	Berberine bridge enzyme	Carbohydrate/alkaloid metabolism, defense
Potri.001G223700		-11	1.6e-10	TRUE	beta glucosidase 27	Hydrolyzes lignin precursors
Potri.001G224000		-11	1.4e-11	TRUE	beta glucosidase 27	Hydrolyzes lignin precursors
ROOT
Potri.005G227800		10	3.5e-05	TRUE	AMP-dependent synthetase and ligase family protein	Fatty acid metabolism
Potri.001G217400		9.2	0.00051	TRUE	Aluminium activated malate transporter family protein	Malate exudation: pH, Al and P
Potri.015G133700		8.6	0.0029	TRUE	3-ketoacyl-CoA synthase 6	Fatty acid regulation
Potri.014G061400		7.3	4.2e-52	TRUE	SPX domain gene 3	Regulation of SPX1, Pi-starvation biomarker, Cellular response to P starvation (GO:0016036)
Potri.012G042200		5.7	7.5e-95	TRUE	purple acid phosphatase 17	Acid phosphatase (Populus P stress)
Potri.008G223500		-15	1.2e-05	TRUE	cytochrome P450, family 71, subfamily B, polypeptide 34
Potri.008G033500		-10	0.00074	TRUE	HXXXD-type acyl-transferase family protein	Phenylpropanoid pathway: lignin and chlorogenic acid biosynthesis
Potri.010G150400		-10	2.3e-23	TRUE	galactinol synthase 1	Accumulates in abiotic stress
Potri.001G060900		-9.5	3.4e-20	TRUE	senescence-associated gene 29	Encodes SWEET15: Bidirectional sugar transporter
Potri.004G058200		-8.6	0.0014	TRUE	transcription factor-related	Phytozome: Tricyclene synthase
Upregulated
Downregulated

## Sheet: GO_enrich
GO_ID	Annotation	#Genome	#Root	#Leaf	#Both	Leaf.KEGGenrich	Leaf.PosEnrich	Root.KEGGenrich	Root.PosEnrich	Leaf-Root.KEGGEnrich	Leaf-Root.SigSameDir
GO:0016042	lipid catabolic process	13	3	9	3	0.000774876	0.359221	1	0.558552	1	0		Enriched in leaf
GO:0016471	vacuolar proton-transporting V-type ATPase complex	6	5	5	4	0.000819709	0.867839	0.000719091	0.240206	1	0.290521		Enriched in root
GO:0010215	cellulose microfibril organization	6	2	5	1	0.000819709	0.0499012	1	0.290644	1	0		Enriched in both
GO:0031225	anchored component of membrane	6	2	5	1	0.000819709	0.0499012	1	0.290644	1	0		Upregulated
GO:0016624	oxidoreductase activity, acting on the aldehyde or oxo group of donors, disulfide as acceptor	10	4	7	4	0.00183273	0.606298	1	0.084474	1	0.290521		Downregulated
GO:0010277	chlorophyllide a oxygenase [overall] activity	14	7	9	6	0.00196571	0.359221	0.0310511	0.585041	0.00408415	0.156591
GO:0016790	thiolester hydrolase activity	14	6	9	4	0.00196571	0.0380577	0.0923236	0.150488	1	0
GO:0016820		19	7	11	5	0.00338545	0.394685	0.180247	0.295592	0.0821373	0.213291
GO:0004654	polyribonucleotide nucleotidyltransferase activity	7	2	5	1	0.00423365	0.867839	1	0.290644	1	0
GO:0015986	ATP synthesis coupled proton transport	31	11	16	6	0.00425242	0.363165	0.190146	0.806465	0.249464	0
GO:0048500	signal recognition particle	20	9	11	7	0.00611957	0.82455	0.0472659	0.595477	0.0111842	0.114964
GO:0030091	protein repair	20	7	11	5	0.00611957	0.938264	0.225728	0.295592	0.101498	0
GO:0008378	galactosyltransferase activity	30	12	15	7	0.00782725	0.258374	0.0831658	0.035863	0.113229	0.114964
GO:0015031	protein transport	53	14	24	11	0.00821346	0.611525	0.652631	0.713647	0.161171	0.0333994
GO:0006464	cellular protein modification process	16	9	9	7	0.00829714	0.832724	0.00700148	0.336567	0.00213317	0.114964
GO:0051537	2 iron, 2 sulfur cluster binding	28	10	14	9	0.00941632	0.334716	0.189178	0.476149	0.011723	0.0619654
GO:0008061	chitin binding	14	5	8	4	0.00953352	0.21853	0.217835	0	1	0.290521
GO:0008312	7S RNA binding	21	9	11	7	0.0103373	0.82455	0.0666471	0.595477	0.0154751	0.114964
GO:0003995	acyl-CoA dehydrogenase activity	12	1	7	0	0.0107861	0.10153	1	0	1	0
GO:0016810	hydrolase activity, acting on carbon-nitrogen (but not peptide) bonds	10	4	6	4	0.0118956	0.930166	1	0.743764	1	0
GO:0007165	signal transduction	263	91	97	52	0.0120765	0.481748	0.0437368	0.464207	0.0767975	0.0186035
GO:0000228	nuclear chromosome	8	2	5	2	0.0125277	0.591404	1	0	1	0
GO:0003935	GTP cyclohydrolase II activity	8	3	5	3	0.0125277	0.0499012	1	0	1	0
GO:0009521	photosystem	8	3	5	3	0.0125277	0.591404	1	0.558552	1	0
GO:0009767	photosynthetic electron transport chain	8	3	5	3	0.0125277	0.591404	1	0.558552	1	0
GO:0016168	chlorophyll binding	8	3	5	3	0.0125277	0.591404	1	0.558552	1	0
GO:0006614	SRP-dependent cotranslational protein targeting to membrane	24	10	12	8	0.0136648	0.886986	0.0731755	0.476149	0.0116805	0.328892
GO:0016671	oxidoreductase activity, acting on a sulfur group of donors, disulfide as acceptor	24	7	12	5	0.0136648	0.963903	0.432579	0.295592	0.198987	0
GO:0009231	riboflavin biosynthetic process	22	8	11	5	0.0164857	0.189412	0.184579	0	0.146554	0
GO:0004616	phosphogluconate dehydrogenase (decarboxylating) activity	22	4	11	3	0.0164857	0.630708	1	0.743764	1	0
GO:0003333	amino acid transmembrane transport	45	15	20	8	0.0169487	0.747989	0.250623	0.794569	0.330183	0.328892
GO:0006812	cation transport	67	26	28	14	0.0189477	0.116759	0.0453347	0.0137062	0.137362	0.237902
GO:0033178	proton-transporting two-sector ATPase complex, catalytic domain	13	2	7	1	0.0205742	0.0150437	1	0.290644	1	0
GO:0033743	peptide-methionine (R)-S-oxide reductase activity	13	2	7	2	0.0205742	0.845849	1	0.290644	1	0
GO:0008408	3'-5' exonuclease activity	25	11	12	7	0.0206118	0.524277	0.0435149	0.36893	0.0445075	0.114964
GO:0016987	sigma factor activity	18	5	9	3	0.0240715	0.359221	0.463222	0	1	0
GO:0006402	mRNA catabolic process	11	4	6	2	0.0241193	0.743184	1	0.37334	1	0
GO:0006807	nitrogen compound metabolic process	49	22	21	14	0.0243021	0.508203	0.00891537	0.720427	0.011287	0.0132166
GO:0015992		28	11	13	6	0.024605	0.929219	0.101386	0.806465	0.172918	0.156591
GO:0004478	methionine adenosyltransferase activity	9	4	5	3	0.0278799	0.254817	1	0.37334	1	0.395716
GO:0004525	ribonuclease III activity	9	4	5	3	0.0278799	0.591404	1	0.37334	1	0
GO:0005471	ATP:ADP antiporter activity	9	3	5	3	0.0278799	0.867839	1	0.902101	1	0
GO:0006556	S-adenosylmethionine biosynthetic process	9	4	5	3	0.0278799	0.254817	1	0.37334	1	0.395716
GO:0008295	spermidine biosynthetic process	9	2	5	1	0.0278799	0.0499012	1	0.787584	1	0
GO:0009073	aromatic amino acid family biosynthetic process	16	4	8	4	0.0291341	0.0625301	1	0	1	0
GO:0050661	NADP binding	39	13	17	7	0.0293874	0.991192	0.257305	0.79942	0.319008	0.114964
GO:0046933	proton-transporting ATP synthase activity, rotational mechanism	21	6	10	3	0.0304398	0.501968	0.446901	0.72644	1	0
GO:0016049	cell growth	21	5	10	3	0.0304398	0.0229412	0.634921	0.0455412	1	0
GO:0003899	DNA-directed 5'-3' RNA polymerase activity	92	37	36	25	0.031399	0.923165	0.0132359	0.963745	0.0036465	0.0217998
GO:0009966	regulation of signal transduction	5	5	3	3	1	0.165526	0	0.0455412	1	0
GO:0004144	diacylglycerol O-acyltransferase activity	13	11	5	5	0.177893	0.591404	4.856e-06	0.0565773	0.012603	0.213291
GO:0045017	glycerolipid biosynthetic process	11	9	5	5	0.0851407	0.591404	4.61684e-05	0.0334464	0.00458515	0.213291
GO:0016638	oxidoreductase activity, acting on the CH-NH2 group of donors	19	12	9	7	0.0371229	0.359221	0.000601565	0.87285	0.00783833	0.114964
GO:0008375	acetylglucosaminyltransferase activity	44	22	17	15	0.0952303	0.471174	0.00159014	0.563221	0.00129304	0.195983
GO:0009765	photosynthesis, light harvesting	46	22	16	11	0.216371	0.559879	0.00336607	0.394655	0.0698891	0.0333994
GO:0004743	pyruvate kinase activity	24	13	8	7	0.297107	0.737827	0.00354575	0.79942	0.0352587	0
GO:0030955	potassium ion binding	24	13	8	7	0.297107	0.737827	0.00354575	0.79942	0.0352587	0
GO:0006537	glutamate biosynthetic process	15	9	7	5	0.0557315	0.10153	0.0035836	0.595477	0.0272766	0.213291
GO:0015930	glutamate synthase activity	15	9	7	5	0.0557315	0.10153	0.0035836	0.595477	0.0272766	0.213291
GO:0005787	signal peptidase complex	7	5	3	2	1	0	0.00374248	0.0455412	1	0
GO:0008113	peptide-methionine (S)-S-oxide reductase activity	7	5	4	3	1	0.757265	0.00374248	0.240206	1	0
GO:0000015	phosphopyruvate hydratase complex	7	5	2	2	1	0.30147	0.00374248	0.573041	1	0
GO:0004634	phosphopyruvate hydratase activity	7	5	2	2	1	0.30147	0.00374248	0.573041	1	0
GO:0016817	hydrolase activity, acting on acid anhydrides	16	9	5	3	0.360001	0.0499012	0.00700148	0.336567	1	0.825569
GO:0030130	clathrin coat of trans-Golgi network vesicle	12	7	3	2	1	0.165526	0.00934759	0.295592	1	0.539
GO:0030132	clathrin coat of coated pit	12	7	3	2	1	0.165526	0.00934759	0.295592	1	0.539
GO:0006096	glycolytic process	82	34	21	16	0.804218	0.813558	0.00958321	0.61372	0.196614	0.0483949
GO:0019239	deaminase activity	10	6	3	1	1	0	0.0104498	0.419642	1	0
GO:0006024	glycosaminoglycan biosynthetic process	8	5	3	2	1	0.573358	0.0111576	0.0455412	1	0
GO:0015012	heparan sulfate proteoglycan biosynthetic process	8	5	3	2	1	0.573358	0.0111576	0.0455412	1	0
GO:0035267	NuA4 histone acetyltransferase complex	8	5	3	3	1	0	0.0111576	0.0455412	1	0
GO:0003950	NAD+ ADP-ribosyltransferase activity	17	9	4	4	1	0.389452	0.0124761	0.336567	1	0.290521
GO:0009607	response to biotic stimulus	27	13	9	8	0.295811	0.949631	0.0139537	0.613316	0.0262082	0
GO:0008171	O-methyltransferase activity	48	21	15	10	0.392178	0.921994	0.0144249	0.787625	0.164483	0.0454929
NONE		19714	6002	6033	3080	0.485176	0.602205	0.014995	0.304742	1	0
GO:0003746	translation elongation factor activity	20	10	6	5	0.414923	0.743184	0.0168418	0.476149	0.101498	0
GO:0007049	cell cycle	38	17	14	7	0.155697	0.73903	0.0175553	0.438082	0.292656	0.114964
GO:0006338	chromatin remodeling	18	9	7	4	0.153877	0.314619	0.0206284	0.134664	1	0
GO:0008483	transaminase activity	23	11	9	7	0.133445	0.0380577	0.0210562	0.0116328	0.0273993	0
GO:0000287	magnesium ion binding	163	60	51	33	0.386971	0.991562	0.0240647	0.895143	0.0929541	0.0389186
GO:0031491	nucleosome binding	9	5	2	1	1	0	0.0250135	0.0455412	1	0
GO:0043044		9	5	2	1	1	0	0.0250135	0.0455412	1	0
GO:0004375	glycine dehydrogenase (decarboxylating) activity	9	5	4	2	1	0.757265	0.0250135	0.573041	1	0
GO:0006366	transcription by RNA polymerase II	9	5	4	2	1	0.0908843	0.0250135	0.573041	1	0
GO:0006414	translational elongation	16	8	4	4	1	0.757265	0.0252954	0.451638	1	0
GO:0015079	potassium ion transmembrane transporter activity	34	15	8	6	0.756526	0.21853	0.0262009	0.621165	0.334025	0
GO:0071805	potassium ion transmembrane transport	34	15	8	6	0.756526	0.21853	0.0262009	0.621165	0.334025	0
GO:0005618	cell wall	90	35	34	23	0.0575716	0.525314	0.0264606	0.186539	0.0109319	0.0348053
GO:0006281	DNA repair	152	56	48	29	0.358935	0.485164	0.0272416	0.187761	0.179448	0.177696
GO:0008233	peptidase activity	29	13	6	5	0.830075	0.0273989	0.028697	0.204642	0.350821	0.213291
GO:0031011	Ino80 complex	29	13	10	8	0.251424	0.264057	0.028697	0.613316	0.0410767	0
GO:0005247	voltage-gated chloride channel activity	14	7	6	5	0.102103	0.162413	0.0310511	0.295592	0.0189922	0
GO:0006821	chloride transport	14	7	6	5	0.102103	0.162413	0.0310511	0.295592	0.0189922	0
GO:0009378	four-way junction helicase activity	51	21	15	8	0.504706	0.816269	0.0310726	0.787625	0.482153	0
GO:0004471	malate dehydrogenase (decarboxylating) (NAD+) activity	17	8	5	2	0.424505	0.0499012	0.0397172	0.900916	1	0.929332
GO:0006465	signal peptide processing	10	5	3	2	1	0	0.046859	0.0455412	1	0
GO:0006914	autophagy	15	7	7	4	0.0557315	0.0150437	0.0493894	0.0924456	1	0
GO:0016702	oxidoreductase activity, acting on single donors with incorporation of molecular oxygen, incorporation of two atoms of oxygen	31	13	11	8	0.213297	0.013719	0.0524343	0.395624	0.0607706	0.0844024
GO:0071949	FAD binding	31	13	8	5	0.640933	0.737827	0.0524343	0.79942	0.414826	0
GO:0006310	DNA recombination	65	25	19	10	0.534636	0.911545	0.0533847	0.65383	0.528342	0.0454929
GO:0015299	solute:proton antiporter activity	48	19	19	8	0.0683453	0.170565	0.0557851	0.0224837	0.406133	0.638737
GO:0031625	ubiquitin protein ligase binding	18	8	6	4	0.297658	0.439624	0.058806	0.201965	1	0
GO:0005779	integral component of peroxisomal membrane	18	8	7	3	0.153877	0.606298	0.058806	0.900916	1	0
GO:0030599	pectinesterase activity	60	23	24	16	0.0451678	0.755037	0.0617272	0.190414	0.016263	0.0483949
GO:0042545	cell wall modification	60	23	24	16	0.0451678	0.755037	0.0617272	0.190414	0.016263	0.0483949
GO:0004012		21	9	7	5	0.297822	0.845849	0.0666471	0.134664	0.123015	0.213291
GO:0015914	phospholipid transport	21	9	7	5	0.297822	0.845849	0.0666471	0.134664	0.123015	0.213291
GO:0004674	protein serine/threonine kinase activity	102	37	31	18	0.469487	0.185925	0.0678278	0.0653323	0.334714	0.00383971
GO:0005874	microtubule	35	14	13	9	0.152881	0.641152	0.0717988	0.512985	0.0546923	0
GO:0005543	phospholipid binding	16	7	5	4	0.360001	0.254817	0.0734834	0.295592	1	0
GO:0008146	sulfotransferase activity	16	7	3	3	1	0.165526	0.0734834	0.832489	1	0.395716
GO:0016559	peroxisome fission	16	7	7	3	0.0823289	0.606298	0.0734834	0.959414	1	0
GO:0003918	DNA topoisomerase type II (double strand cut, ATP-hydrolyzing) activity	11	5	2	1	1	0.30147	0.0774739	0.0455412	1	0
GO:0009678	pyrophosphate hydrolysis-driven proton transmembrane transporter activity	11	5	4	2	1	0.958651	0.0774739	0.857579	1	0
GO:0008641	ubiquitin-like modifier activating enzyme activity	19	8	1	1	1	0.549063	0.0828829	0.0559391	1	0
GO:0005198	structural molecule activity	30	12	5	3	0.932858	0.591404	0.0831658	0.496097	1	0.395716
GO:0004857	enzyme inhibitor activity	71	26	27	16	0.0704695	0.980274	0.0887808	0.426857	0.072651	0.0483949
GO:0006284	base-excision repair	22	9	6	5	0.530366	0.162413	0.0904139	0.336567	0.146554	0
GO:0019904	protein domain specific binding	25	10	8	4	0.347204	0.21853	0.0964802	0.476149	1	0
GO:0016705	oxidoreductase activity, acting on paired donors, with incorporation or reduction of molecular oxygen	311	103	101	58	0.21571	0.723346	0.0989649	0.581479	0.152895	3.92618e-06
GO:0006887	exocytosis	28	11	8	4	0.500159	0.474769	0.101386	0.36893	1	0
GO:0008289	lipid binding	60	22	23	14	0.076962	0.0500378	0.101946	0.24298	0.0642929	0
GO:0004185	serine-type carboxypeptidase activity	69	25	24	14	0.186821	0.17065	0.102855	0.342945	0.164397	0
GO:0016614	oxidoreductase activity, acting on CH-OH group of donors	17	7	4	3	1	0.389452	0.103498	0.295592	1	0
GO:0006351	transcription, DNA-templated	227	76	77	46	0.123176	0.572054	0.108005	0.895882	0.0631368	0.00246762
GO:0000922	spindle pole	12	5	3	2	1	0.908305	0.116803	0.0455412	1	0.539
GO:0005815	microtubule organizing center	12	5	3	2	1	0.908305	0.116803	0.0455412	1	0.539
GO:0042651	thylakoid membrane	12	5	6	5	0.0427857	0.930166	0.116803	0.240206	0.00788611	0.599442
GO:0005667	transcription regulator complex	12	5	4	2	1	0.0908843	0.116803	0.240206	1	0
GO:0005685	U1 snRNP	12	5	4	2	1	0.0908843	0.116803	0.240206	1	0
GO:0019684	photosynthesis, light reaction	12	5	6	4	0.0427857	0.439624	0.116803	0.573041	1	0
GO:0006952	defense response	49	18	18	12	0.138842	0.981348	0.117242	0.716229	0.053979	0.0245207
GO:0001104		23	9	7	5	0.406269	0.314619	0.118598	0.134664	0.171945	0
GO:0016887	ATP hydrolysis activity	238	79	68	39	0.726912	0.755809	0.12134	0.334215	0.501853	0.000655023
GO:0006073	cellular glucan metabolic process	29	11	9	6	0.390988	0.148184	0.127662	0.36893	0.19725	0.156591
GO:0016762	xyloglucan:xyloglucosyl transferase activity	29	11	9	6	0.390988	0.148184	0.127662	0.36893	0.19725	0.156591
GO:0048046	apoplast	29	11	9	6	0.390988	0.148184	0.127662	0.36893	0.19725	0.156591
GO:0006357	regulation of transcription by RNA polymerase II	35	13	10	6	0.520913	0.0985238	0.133103	0.0224621	0.36315	0
GO:0019898	extrinsic component of membrane	41	15	11	9	0.630785	0.394685	0.136228	0.104269	0.132693	0.0619654
GO:0008080	N-acetyltransferase activity	59	21	21	12	0.164489	0.508203	0.138048	0.787625	0.173215	0.0245207
GO:0006542	glutamine biosynthetic process	18	7	5	3	0.487928	0.0499012	0.139251	0.295592	1	0
GO:0003887	DNA-directed DNA polymerase activity	18	7	7	4	0.153877	0.845849	0.139251	0.832489	1	0
GO:0006950	response to stress	115	39	40	21	0.141129	0.210755	0.150582	0.568497	0.272132	0.00151943
GO:0006298	mismatch repair	24	9	7	4	0.460849	0.0150437	0.151042	0.134664	1	0.290521
GO:0003684	damaged DNA binding	27	10	6	5	0.764761	0.0273989	0.154688	0.0880141	0.287734	0
GO:0016592	mediator complex	27	10	9	5	0.295811	0.619204	0.154688	0.243513	0.287734	0
GO:0007264	small GTPase mediated signal transduction	69	24	19	11	0.657937	0.668014	0.155895	0.0707165	0.484432	0.166428
GO:0016747	acyltransferase activity, transferring groups other than amino-acyl groups	153	51	49	25	0.315271	0.896686	0.156781	0.713035	0.488724	0.0217998
GO:0006289	nucleotide-excision repair	30	11	8	5	0.596371	0.21853	0.157326	0.36893	0.382821	0
GO:0030170	pyridoxal phosphate binding	100	34	34	21	0.197094	0.265363	0.159098	0.0744481	0.0993053	0.013073
GO:0046873	metal ion transmembrane transporter activity	36	13	10	5	0.564659	0.501968	0.160439	0.613316	0.568396	0
GO:0009654	photosystem II oxygen evolving complex	45	16	13	10	0.526182	0.424098	0.161662	0.0725306	0.117104	0.210218
GO:0020037	heme binding	438	140	141	77	0.216777	0.495567	0.162501	0.366541	0.275456	1.80126e-07
GO:0006546	glycine catabolic process	13	5	5	2	0.177893	0.867839	0.164044	0.573041	1	0
GO:0070569	uridylyltransferase activity	13	5	4	3	1	0.389452	0.164044	0.573041	1	0
GO:0017089	glycolipid transfer activity	13	5	4	2	1	0.389452	0.164044	0.979205	1	0.539
GO:0046836	glycolipid transport	13	5	4	2	1	0.389452	0.164044	0.979205	1	0.539
GO:0051861	glycolipid binding	13	5	4	2	1	0.389452	0.164044	0.979205	1	0.539
GO:0042626	ATPase-coupled transmembrane transporter activity	82	28	28	16	0.205179	0.63177	0.169606	0.959292	0.196614	0.160474
GO:0000062	fatty-acyl-CoA binding	16	6	6	4	0.189616	0.743184	0.173764	0.419642	1	0
GO:0004197	cysteine-type endopeptidase activity	19	7	6	3	0.355871	0.162413	0.180247	0.832489	1	0.395716
GO:0006139	nucleobase-containing compound metabolic process	58	20	21	12	0.142615	0.338084	0.183028	0.552489	0.157701	0.0245207
GO:0004356	glutamate-ammonia ligase activity	22	8	6	4	0.530366	0.0273989	0.184579	0.201965	1	0
GO:0005681	spliceosomal complex	22	8	6	4	0.530366	0.439624	0.184579	0.201965	1	0
GO:0016884	carbon-nitrogen ligase activity, with glutamine as amido-N-donor	22	8	5	3	0.707803	0.0499012	0.184579	0.451638	1	0
GO:0016746	acyltransferase activity	52	18	18	10	0.215559	0.574672	0.185887	0.851261	0.239712	0.0454929
GO:0005643	nuclear pore	25	9	7	4	0.51433	0.606298	0.187416	0.134664	1	0.290521
GO:0008610	lipid biosynthetic process	25	9	6	2	0.682813	0.0273989	0.187416	0.336567	1	0
GO:0016818	hydrolase activity, acting on acid anhydrides, in phosphorus-containing anhydrides	28	10	7	4	0.660717	0.314619	0.189178	0.476149	1	0
GO:0016779	nucleotidyltransferase activity	43	15	13	8	0.446371	0.424098	0.189241	0.418327	0.281061	0
GO:0006413	translational initiation	40	14	10	5	0.719485	0.896914	0.189971	0.949297	0.675479	0
GO:0000145	exocyst	31	11	8	4	0.640933	0.474769	0.190146	0.36893	1	0
GO:0005506	iron ion binding	364	116	117	67	0.240751	0.627741	0.192729	0.503739	0.165229	2.63884e-06
GO:0003924	GTPase activity	77	26	25	13	0.311241	0.239427	0.193936	0.281411	0.405389	0
GO:0004222	metalloendopeptidase activity	77	26	22	11	0.597502	0.600258	0.193936	0.426857	0.646487	0.0333994
GO:0016758	hexosyltransferase activity	166	54	51	29	0.448097	0.557899	0.206131	0.895835	0.342219	0.177696
GO:0006486	protein glycosylation	50	17	20	9	0.0578508	0.128163	0.214716	0.127285	0.316019	0.0619654
GO:0010333	terpene synthase activity	50	17	18	11	0.162461	0.870334	0.214716	0.963127	0.116682	0.166428
GO:0003872	6-phosphofructokinase activity	14	5	2	1	1	0	0.217835	0.240206	1	0.734166
GO:0004175	endopeptidase activity	14	5	2	2	1	0.30147	0.217835	0.240206	1	0
GO:0019773	proteasome core complex, alpha-subunit complex	14	5	2	2	1	0.30147	0.217835	0.240206	1	0
GO:0043161	proteasome-mediated ubiquitin-dependent protein catabolic process	14	5	3	2	1	0.165526	0.217835	0.573041	1	0
GO:0045261	proton-transporting ATP synthase complex, catalytic core F(1)	14	5	6	3	0.102103	0.743184	0.217835	0.857579	1	0
GO:0015934	large ribosomal subunit	14	5	5	4	0.234735	0.867839	0.217835	0.857579	1	0.290521
GO:0004252	serine-type endopeptidase activity	116	38	32	19	0.724092	0.372849	0.220138	0.499943	0.470956	0
GO:0005516	calmodulin binding	41	14	17	11	0.049502	0.659674	0.220977	0.713647	0.0312808	0.166428
GO:0007017	microtubule-based process	38	13	12	8	0.371554	0.30212	0.222809	0.395624	0.170145	0
GO:0008324	cation transmembrane transporter activity	17	6	7	5	0.115149	0.0150437	0.22295	0.0245519	0.050193	0
GO:0008374	O-acyltransferase activity	17	6	6	3	0.241743	0.743184	0.22295	0.419642	1	0.395716
GO:0016868	intramolecular transferase activity, phosphotransferases	17	6	3	2	1	0.573358	0.22295	0.419642	1	0
GO:0010181	FMN binding	35	12	9	5	0.663882	0.619204	0.224438	0.278097	0.539071	0.213291
GO:0004866	endopeptidase inhibitor activity	20	7	8	4	0.125353	0.21853	0.225728	0.295592	1	0
GO:0044237	cellular metabolic process	23	8	7	6	0.406269	0.314619	0.226996	0.451638	0.0746129	0.156591
GO:0035091	phosphatidylinositol binding	26	9	5	2	0.852907	0.591404	0.227241	0.336567	1	0
GO:0016567	protein ubiquitination	123	40	41	24	0.222755	0.174372	0.232255	0.176127	0.164636	0.0275837
GO:0004970	ionotropic glutamate receptor activity	51	17	18	8	0.188079	0.574672	0.243974	0.791247	0.482153	0.328892
GO:0005507	copper ion binding	89	29	30	12	0.223902	0.765905	0.251302	0.244687	0.739898	0.131065
GO:0004298	threonine-type endopeptidase activity	42	14	8	8	0.931764	0.737827	0.253968	0.863749	0.257298	0.0844024
GO:0005839	proteasome core complex	42	14	8	8	0.931764	0.737827	0.253968	0.863749	0.257298	0.0844024
GO:0051603	proteolysis involved in cellular protein catabolic process	42	14	8	8	0.931764	0.737827	0.253968	0.863749	0.257298	0.0844024
GO:0055085	transmembrane transport	743	230	230	118	0.397718	0.644587	0.255974	0.678576	0.695986	7.8311e-05
GO:0009523	photosystem II	61	20	16	11	0.722224	0.1955	0.261933	0.0453231	0.311774	0.166428
GO:0004190	aspartic-type endopeptidase activity	96	31	29	19	0.483016	0.279846	0.265957	0.390276	0.166888	0.0854133
GO:0004089	carbonate dehydratase activity	30	10	13	6	0.0468266	0.225883	0.266977	0.476149	0.222822	0
GO:0016620	oxidoreductase activity, acting on the aldehyde or oxo group of donors, NAD or NADP as acceptor	27	9	10	6	0.173792	0.73644	0.269919	0.595477	0.149982	0.49679
GO:0030247	polysaccharide binding	74	24	26	13	0.164672	0.62199	0.271944	0.14696	0.345733	0.102742
GO:0030983	mismatched DNA binding	21	7	6	3	0.473474	0.0273989	0.274757	0.295592	1	0.395716
GO:0004345	glucose-6-phosphate dehydrogenase activity	21	7	8	3	0.162324	0.737827	0.274757	0.832489	1	0.395716
GO:0006006	glucose metabolic process	21	7	8	3	0.162324	0.737827	0.274757	0.832489	1	0.395716
GO:0003747	translation release factor activity	18	6	2	1	1	0.30147	0.276212	0.150488	1	0
GO:0032502	developmental process	18	6	6	4	0.297658	0.743184	0.276212	0.72644	1	0
GO:0006265	DNA topological change	15	5	4	1	1	0.0908843	0.276464	0.0455412	1	0
GO:0016717	oxidoreductase activity, acting on paired donors, with oxidation of a pair of donors resulting in the reduction of molecular oxygen to two molecules of water	15	5	3	2	1	0.165526	0.276464	0.240206	1	0
GO:0009228	thiamine biosynthetic process	15	5	6	2	0.142678	0.162413	0.276464	0.573041	1	0
GO:0016579	protein deubiquitination	15	5	6	3	0.142678	0.162413	0.276464	0.573041	1	0
GO:0032549	ribonucleoside binding	15	5	6	4	0.142678	0.439624	0.276464	0.573041	1	0
GO:0019538	protein metabolic process	15	5	5	3	0.296106	0.867839	0.276464	0.573041	1	0.395716
GO:0008519	ammonium transmembrane transporter activity	15	5	4	2	1	0.757265	0.276464	0.573041	1	0
GO:0072488	ammonium transmembrane transport	15	5	4	2	1	0.757265	0.276464	0.573041	1	0
GO:0030036	actin cytoskeleton organization	15	5	3	2	1	0.908305	0.276464	0.857579	1	0
GO:0003676	nucleic acid binding	782	241	233	117	0.672785	0.232084	0.27868	0.623619	0.892514	1.10585e-05
GO:0006629	lipid metabolic process	171	54	52	26	0.483789	0.294874	0.287295	0.459314	0.650857	0.0171843
GO:0009058	biosynthetic process	155	49	49	28	0.354927	0.228874	0.290262	0.379579	0.275642	0.0106026
GO:0048544	recognition of pollen	126	40	36	19	0.650396	0.104662	0.290928	0.270783	0.629965	0.0854133
GO:0000160	phosphorelay signal transduction system	123	39	39	19	0.353283	0.491037	0.295488	0.319336	0.584297	0.0222128
GO:0006662	glycerol ether metabolic process	53	17	17	9	0.344963	0.471174	0.30674	0.791247	0.387195	0
GO:0016829	lyase activity	69	22	26	14	0.0814758	0.931353	0.309167	0.924637	0.164397	0.237902
GO:0006855	xenobiotic transmembrane transport	82	26	26	17	0.362461	0.190968	0.314382	0.838969	0.128528	0.0374236
GO:0015238		82	26	26	17	0.362461	0.190968	0.314382	0.838969	0.128528	0.0374236
GO:0015297	antiporter activity	82	26	26	17	0.362461	0.190968	0.314382	0.838969	0.128528	0.0374236
GO:0006397	mRNA processing	28	9	12	8	0.0567789	0.30212	0.314775	0.595477	0.0330696	0
GO:0009733	response to auxin	66	21	18	10	0.669435	0.870334	0.314812	0.891495	0.550149	0.0454929
GO:0003743	translation initiation factor activity	66	21	15	8	0.897385	0.816269	0.314812	0.994983	0.791629	0
GO:0004650	polygalacturonase activity	25	8	11	3	0.0509325	0.630708	0.320465	0.00713587	1	0.395716
GO:0008536		25	8	11	5	0.0509325	0.394685	0.320465	0.201965	0.227459	0
GO:0016760	cellulose synthase (UDP-forming) activity	25	8	8	3	0.347204	0.00825995	0.320465	0.201965	1	0.395716
GO:0046961	proton-transporting ATPase activity, rotational mechanism	19	6	8	3	0.0933955	0.737827	0.332193	0.72644	1	0
GO:0016788	hydrolase activity, acting on ester bonds	128	40	46	24	0.0809278	0.590382	0.332821	0.176127	0.221363	0.00582633
GO:0005524	ATP binding	2137	648	669	343	0.224853	0.192671	0.334415	0.342638	0.76932	0
GO:0003729	mRNA binding	16	5	3	1	1	0.165526	0.338085	0.240206	1	0
GO:0015979	photosynthesis	109	34	35	22	0.3235	0.598071	0.343419	0.137422	0.132671	0.12534
GO:0019752	carboxylic acid metabolic process	35	11	10	5	0.520913	0.896914	0.345288	0.806465	0.539071	0
GO:0030244	cellulose biosynthetic process	29	9	10	4	0.251424	0.0229412	0.361092	0.336567	1	0.290521
GO:0043531	ADP binding	336	103	116	52	0.0529693	0.071903	0.361092	0.0835804	0.690164	0.000130533
GO:0009116	nucleoside metabolic process	42	13	9	4	0.870713	0.148184	0.369814	0.0805325	1	0
GO:0045735	nutrient reservoir activity	26	8	7	4	0.565882	0.314619	0.369819	0.0559391	1	0
GO:0030117	membrane coat	26	8	6	3	0.725893	0.439624	0.369819	0.718443	1	0.395716
GO:0005789	endoplasmic reticulum membrane	55	17	14	9	0.748823	0.543274	0.373536	0.438082	0.435282	0
GO:0016301	kinase activity	55	17	15	10	0.645055	0.650756	0.373536	0.628478	0.303032	0.478621
GO:0008271	secondary active sulfate transmembrane transporter activity	23	7	3	0	1	0.165526	0.379242	0.959414	1	0
GO:0008272	sulfate transport	23	7	3	0	1	0.165526	0.379242	0.959414	1	0
GO:0015116	sulfate transmembrane transporter activity	23	7	3	0	1	0.165526	0.379242	0.959414	1	0
GO:0046983	protein dimerization activity	348	106	108	53	0.403813	0.157239	0.389677	0.626581	0.737141	0.0357493
GO:0005216	ion channel activity	33	10	11	4	0.292159	0.394685	0.39749	0.714804	1	0
GO:0006811	ion transport	33	10	11	4	0.292159	0.394685	0.39749	0.714804	1	0
GO:0000398	mRNA splicing, via spliceosome	46	14	14	9	0.437827	0.165421	0.39935	0.307603	0.226876	0
GO:0034968	histone lysine methylation	17	5	8	4	0.0454058	0	0.400885	0	1	0
GO:0030976	thiamine pyrophosphate binding	17	5	6	2	0.241743	0.439624	0.400885	0.0455412	1	0.539
GO:0003697	single-stranded DNA binding	17	5	5	3	0.424505	0.254817	0.400885	0.240206	1	0.395716
GO:0008652	cellular amino acid biosynthetic process	17	5	7	3	0.115149	0.10153	0.400885	0.573041	1	0.395716
GO:0006511	ubiquitin-dependent protein catabolic process	92	28	24	13	0.794342	0.450225	0.407937	0.0973544	0.686728	0
GO:0016192	vesicle-mediated transport	102	31	36	11	0.128175	0.180272	0.411914	0.669945	0.933395	0.166428
GO:0042254	ribosome biogenesis	27	8	9	3	0.295811	0.359221	0.41977	0.0559391	1	0
GO:0015171	amino acid transmembrane transporter activity	27	8	11	4	0.0906779	0.82455	0.41977	0.451638	1	0.711299
GO:0046854	phosphatidylinositol phosphate biosynthetic process	27	8	10	4	0.173792	0.73644	0.41977	0.718443	1	0
GO:0003854	3-beta-hydroxy-delta5-steroid dehydrogenase activity	50	15	12	7	0.803379	0.963903	0.426877	0.794569	0.608136	0.114964
GO:0006633	fatty acid biosynthetic process	73	22	25	10	0.208924	0.131963	0.427825	0.24298	0.689584	0
GO:0005525	GTP binding	311	94	102	50	0.181752	0.98147	0.427862	0.214819	0.572029	0.00355741
GO:0003723	RNA binding	394	119	124	63	0.330136	0.741593	0.42912	0.548816	0.607945	0.000734135
GO:0016149	translation release factor activity, codon specific	24	7	3	1	1	0.573358	0.432579	0.0924456	1	0
GO:0006886	intracellular protein transport	169	51	52	26	0.443143	0.294874	0.434973	0.199699	0.625471	0.0171843
GO:0004843	thiol-dependent deubiquitinase	21	6	8	4	0.162324	0.474769	0.446901	0.150488	1	0
GO:0016020	membrane	1198	360	357	183	0.716618	0.317194	0.450832	0.320588	0.89718	1.55472e-08
GO:0006810	transport	366	110	115	60	0.342093	0.947013	0.45439	0.866399	0.519392	0.00139249
GO:0003677	DNA binding	1192	358	373	177	0.286591	0.673207	0.45589	0.437485	0.952878	3.62321e-06
GO:0006479	protein methylation	18	5	7	3	0.153877	0.0150437	0.463222	0	1	0
GO:2001070	starch binding	18	5	5	2	0.487928	0	0.463222	0.240206	1	0
GO:0003993	acid phosphatase activity	18	5	6	3	0.297658	0.743184	0.463222	0.573041	1	0
GO:0005886	plasma membrane	18	5	5	2	0.487928	0.254817	0.463222	0.573041	1	0
GO:0003712	transcription coregulator activity	28	8	10	6	0.21112	0.73644	0.469504	0.718443	0.172918	0
GO:0005852	eukaryotic translation initiation factor 3 complex	28	8	6	2	0.799442	0.439624	0.469504	0.997964	1	0
GO:0007275	multicellular organism development	78	23	30	13	0.0536938	0.0680511	0.478607	0.324751	0.425457	0.0180023
GO:0000159	protein phosphatase type 2A complex	25	7	10	4	0.10991	0.0985238	0.485338	0.0924456	1	0
GO:0008601		25	7	10	4	0.10991	0.0985238	0.485338	0.0924456	1	0
GO:0004601	peroxidase activity	102	30	33	15	0.307399	0.316454	0.497208	0.197652	0.644368	0
GO:0006418	tRNA aminoacylation for protein translation	62	18	22	13	0.164787	0.273418	0.499215	0.716229	0.14021	0
GO:0003682	chromatin binding	49	14	15	9	0.429787	0.449227	0.512568	0.713647	0.292926	0.263899
GO:0008033	tRNA processing	39	11	10	4	0.684338	0.73644	0.514941	0.0565773	1	0
GO:0042393	histone binding	39	11	10	7	0.684338	0.264057	0.514941	0.171846	0.319008	0
GO:0005509	calcium ion binding	143	42	38	23	0.829941	0.673043	0.517627	0.0335209	0.518346	0.0348053
GO:0006801	superoxide metabolic process	29	8	5	2	0.917663	0.0499012	0.51829	0.00713587	1	0
GO:0006415	translational termination	29	8	3	1	1	0.573358	0.51829	0.0559391	1	0
GO:0019205	nucleobase-containing compound kinase activity	29	8	9	5	0.390988	0.148184	0.51829	0.451638	0.350821	0
GO:0004812	aminoacyl-tRNA ligase activity	66	19	23	13	0.18734	0.360209	0.520421	0.789027	0.200038	0
GO:0018024	histone-lysine N-methyltransferase activity	19	5	8	4	0.0933955	0	0.523697	0	1	0
GO:0035556	intracellular signal transduction	19	5	6	3	0.355871	0.439624	0.523697	0.0455412	1	0
GO:0006904	vesicle docking involved in exocytosis	19	5	6	1	0.355871	0.162413	0.523697	0.240206	1	0
GO:0009055	electron transfer activity	130	38	46	26	0.101138	0.168422	0.526763	0.902566	0.12771	0.0171843
GO:0008138	protein tyrosine/serine/threonine phosphatase activity	26	7	8	2	0.398337	0.474769	0.53668	0.832489	1	0
GO:0005515	protein binding	3035	905	958	477	0.110758	0.0718518	0.549122	0.615654	0.922177	0
GO:0003774	cytoskeletal motor activity	23	6	4	1	1	0.0908843	0.557414	0.0245519	1	0
GO:0016459	myosin complex	23	6	4	1	1	0.0908843	0.557414	0.0245519	1	0
GO:0030127	COPII vesicle coat	23	6	8	4	0.248989	0.474769	0.557414	0.419642	1	0.290521
GO:0003755	peptidyl-prolyl cis-trans isomerase activity	74	21	27	12	0.111227	0.0759517	0.559209	0.471276	0.464274	0.0245207
GO:0006468	protein phosphorylation	1706	507	511	254	0.712193	0.107633	0.56745	0.182524	0.976503	0
GO:0006260	DNA replication	54	15	15	7	0.61178	0.816269	0.570718	0.233787	0.696965	0.114964
GO:0004386	helicase activity	37	10	9	5	0.737359	0.0380577	0.572628	0.0880141	0.596779	0
GO:0004672	protein kinase activity	1707	507	511	254	0.717732	0.107633	0.573783	0.182524	0.977095	0
GO:0005215	transporter activity	193	56	52	28	0.847646	0.61667	0.575704	0.12362	0.75632	0.00017468
GO:0000272	polysaccharide catabolic process	20	5	2	1	1	0.796656	0.581201	0.573041	1	0
GO:0016161	beta-amylase activity	20	5	2	1	1	0.796656	0.581201	0.573041	1	0
GO:0045454	cell redox homeostasis	136	39	42	21	0.42965	0.921023	0.585281	0.997021	0.595187	0
GO:0004518	nuclease activity	34	9	6	3	0.931728	0	0.59076	0.336567	1	0.395716
GO:0006352	DNA-templated transcription, initiation	41	11	14	6	0.249897	0.165421	0.595545	0.00111812	0.536038	0
GO:0006508	proteolysis	537	157	137	76	0.994797	0.837071	0.619107	0.38377	0.936422	0.000152665
GO:0016021	integral component of membrane	1184	349	379	178	0.135158	0.752262	0.623411	0.728281	0.9318	9.42304e-05
GO:0004553	hydrolase activity, hydrolyzing O-glycosyl compounds	345	100	97	49	0.827558	0.1423	0.6259	0.130917	0.877125	4.9745e-06
GO:0006396	RNA processing	66	18	19	11	0.566845	0.668014	0.626196	0.355965	0.419306	0
GO:0043169	cation binding	28	7	9	3	0.342862	0.148184	0.632466	0.0924456	1	0
GO:0003678	DNA helicase activity	21	5	3	1	1	0.165526	0.634921	0.240206	1	0
GO:0005885	Arp2/3 protein complex	21	5	7	2	0.297822	0.10153	0.634921	0.573041	1	0
GO:0034314	Arp2/3 complex-mediated actin nucleation	21	5	7	2	0.297822	0.10153	0.634921	0.573041	1	0
GO:0006694	steroid biosynthetic process	56	15	14	7	0.775169	0.879704	0.637386	0.794569	0.736166	0.114964
GO:0016740	transferase activity	46	12	7	5	0.986271	0.606298	0.651851	0.713526	0.800665	0
GO:0016597	amino acid binding	39	10	14	7	0.184779	0.165421	0.651861	0.714804	0.319008	0.114964
GO:0005992	trehalose biosynthetic process	25	6	9	4	0.208046	0.0380577	0.656837	0.0245519	1	0.290521
GO:0015693	magnesium ion transport	25	6	10	4	0.10991	0.501968	0.656837	0.150488	1	0
GO:0006457	protein folding	191	54	66	28	0.103256	0.0596541	0.661002	0.670921	0.736121	0.00194567
GO:0000166	nucleotide binding	174	49	59	31	0.15105	0.594001	0.662819	0.276269	0.297858	6.91235e-05
GO:0004842	ubiquitin-protein transferase activity	161	45	54	28	0.184041	0.624742	0.675716	0.252407	0.352819	0.0377692
GO:0009507	chloroplast	29	7	3	0	1	0.165526	0.675961	0.295592	1	0
GO:0050660	flavin adenine dinucleotide binding	99	27	32	13	0.311006	0.247787	0.676372	0.0622668	0.787114	0
GO:0008234	cysteine-type peptidase activity	75	20	21	9	0.63623	0.675862	0.684112	0.376278	0.822202	0.0619654
GO:0005694	chromosome	22	5	5	2	0.707803	0.0499012	0.684321	0.240206	1	0
GO:0004871	obsolete signal transducer activity	40	10	6	3	0.98033	0.439624	0.688248	0.0198045	1	0
GO:0009522	photosystem I	33	8	11	8	0.292159	0.82455	0.692964	0.451638	0.0856227	0.0844024
GO:0000413	protein peptidyl-prolyl isomerization	65	17	22	9	0.238176	0.149688	0.697452	0.259911	0.659267	0
GO:0005783	endoplasmic reticulum	65	17	18	10	0.639902	0.388375	0.697452	0.791247	0.528342	0.0454929
GO:0006979	response to oxidative stress	142	39	47	20	0.228264	0.751097	0.706617	0.131837	0.757382	0
GO:0015078	proton transmembrane transporter activity	37	9	13	6	0.215741	0.0918018	0.708287	0.595477	0.42175	0.156591
GO:0051536	iron-sulfur cluster binding	76	20	24	13	0.372635	0.611525	0.709663	0.718196	0.385376	0
GO:0015035	protein-disulfide reductase activity	94	25	30	14	0.343936	0.640956	0.720734	0.97733	0.614772	0
GO:0016627	oxidoreductase activity, acting on the CH-CH group of donors	23	5	6	2	0.584658	0.0273989	0.729112	0	1	0
GO:0015095	magnesium ion transmembrane transporter activity	23	5	9	3	0.133445	0.619204	0.729112	0.240206	1	0
GO:0005739	mitochondrion	52	13	10	3	0.952595	0.264057	0.730062	0.204642	1	0
GO:0005634	nucleus	863	249	246	118	0.905476	0.170581	0.745952	0.252146	0.991273	7.28937e-07
GO:0015629	actin cytoskeleton	35	8	8	2	0.788596	0.0625301	0.763467	0.451638	1	0.539
GO:0008299	isoprenoid biosynthetic process	24	5	8	3	0.297107	0.00825995	0.76921	0.0455412	1	0.395716
GO:0022857	transmembrane transporter activity	100	26	31	12	0.416966	0.818727	0.771713	0.426857	0.869941	0.0245207
GO:0016757	glycosyltransferase activity	86	22	27	16	0.385221	0.0759517	0.775763	0.0577708	0.257828	0.00712377
GO:0000155	phosphorelay sensor kinase activity	28	6	11	5	0.116102	0.189412	0.777745	0.0245519	0.319048	0
GO:0055114	obsolete oxidation-reduction process	1679	488	543	261	0.0541727	0.797267	0.778461	0.413753	0.887899	1.80234e-12
GO:0000226	microtubule cytoskeleton organization	32	7	6	2	0.900142	0.930166	0.786062	0.0132363	1	0.539
GO:0008168	methyltransferase activity	248	68	63	33	0.958193	0.610161	0.786693	0.844219	0.911591	3.72576e-05
GO:0004722	protein serine/threonine phosphatase activity	154	41	47	29	0.468894	0.650389	0.790165	0.332373	0.199793	0.478327
GO:0031072	heat shock protein binding	25	5	4	3	1	0.0908843	0.804697	0.0455412	1	0
GO:0004427	inorganic diphosphatase activity	25	5	5	2	0.823596	0.867839	0.804697	0.857579	1	0
GO:0030246	carbohydrate binding	66	16	17	9	0.76153	0.287559	0.808386	0.174094	0.678753	0
GO:0016209	antioxidant activity	29	6	5	2	0.917663	0	0.810131	0.0245519	1	0
GO:0047262	polygalacturonate 4-alpha-galacturonosyltransferase activity	29	6	7	3	0.703167	0.10153	0.810131	0.419642	1	0
GO:0046872	metal ion binding	462	129	131	63	0.841503	0.211361	0.815438	0.190951	0.956924	7.59483e-06
GO:0005096	GTPase activator activity	33	7	7	2	0.836663	0.314619	0.815853	0.585041	1	0
GO:0006888	endoplasmic reticulum to Golgi vesicle-mediated transport	37	8	12	6	0.330232	0.524277	0.821659	0.718443	0.42175	0.156591
GO:0006470	protein dephosphorylation	185	49	57	31	0.439047	0.585479	0.827733	0.604793	0.437314	0.393326
GO:0016787	hydrolase activity	384	106	121	54	0.325732	0.288646	0.827839	0.817439	0.905294	7.84446e-05
GO:0005975	carbohydrate metabolic process	492	137	137	63	0.900979	0.14039	0.833635	0.0947774	0.989415	9.81742e-07
GO:0006334	nucleosome assembly	49	11	11	6	0.861664	0.938264	0.838649	0.36893	0.729148	0
GO:0042578	phosphoric ester hydrolase activity	34	7	7	4	0.86132	0.0150437	0.842344	0.0924456	1	0
GO:0043565	sequence-specific DNA binding	365	100	104	49	0.792855	0.193354	0.842913	0.612312	0.947322	0.0127594
GO:0016773	phosphotransferase activity, alcohol group as acceptor	53	12	13	7	0.789024	0.819415	0.844029	0.87285	0.676025	0
GO:0006520	cellular amino acid metabolic process	42	9	17	7	0.0625486	0.145287	0.850464	0.336567	0.400002	0
GO:0009982	pseudouridine synthase activity	31	6	9	3	0.487443	0.619204	0.863793	0.72644	1	0
GO:0001522	pseudouridine synthesis	39	8	10	3	0.684338	0.73644	0.868183	0.451638	1	0
GO:0003777	microtubule motor activity	121	30	34	17	0.687324	0.525314	0.873304	0.836267	0.736249	0.0374236
GO:0007018	microtubule-based movement	121	30	34	17	0.687324	0.525314	0.873304	0.836267	0.736249	0.0374236
GO:0030001	metal ion transport	154	39	45	17	0.607565	0.526739	0.878686	0.688794	0.96614	0
GO:0008270	zinc ion binding	1093	309	344	158	0.2505	0.0696244	0.882294	0.414133	0.9751	2.56049e-07
GO:0051287	NAD binding	82	19	28	10	0.205179	0.336716	0.890203	0.985989	0.824679	0.737784
GO:0003690	double-stranded DNA binding	33	6	5	1	0.964594	0.254817	0.904325	0.419642	1	0
GO:0003700	DNA-binding transcription factor activity	678	187	195	90	0.84224	0.0183945	0.905203	0.858328	0.991457	0.0589825
GO:0007034	vacuolar transport	29	5	7	2	0.703167	0.0150437	0.905676	0.857579	1	0
GO:0008152	metabolic process	848	236	270	133	0.202441	0.795531	0.906368	0.963334	0.76265	0.00108184
GO:0005871	kinesin complex	118	28	33	16	0.695375	0.449385	0.917358	0.727996	0.779082	0.0483949
GO:0009451	RNA modification	34	6	9	3	0.623034	0.619204	0.920394	0.72644	1	0
GO:0008236	serine-type peptidase activity	71	15	9	8	0.999633	0.99078	0.935551	0.233787	0.856965	0.638737
GO:0000079	regulation of cyclin-dependent protein serine/threonine kinase activity	31	5	9	3	0.487443	0.619204	0.936479	0.857579	1	0.395716
GO:0019901	protein kinase binding	31	5	9	3	0.487443	0.619204	0.936479	0.857579	1	0.395716
GO:0008017	microtubule binding	155	37	43	19	0.751477	0.282594	0.94333	0.790446	0.917459	0.0222128
GO:0003779	actin binding	40	7	8	3	0.903508	0.21853	0.943843	0.0924456	1	0.395716
GO:0003735	structural constituent of ribosome	426	112	120	53	0.850979	0.0250307	0.946273	0.277805	0.99059	0.00186663
GO:0000786	nucleosome	61	12	18	7	0.510933	0.870334	0.950463	0.713526	0.818344	0.114964
GO:0005840	ribosome	417	108	116	51	0.882411	0.032826	0.961747	0.264178	0.992811	0.00078266
GO:0006412	translation	441	114	125	54	0.836328	0.00982228	0.967759	0.224231	0.994026	0.0015005
GO:0009725	response to hormone	64	12	17	8	0.709687	0.0181082	0.96946	0.11872	0.760041	0
GO:0016491	oxidoreductase activity	812	218	240	116	0.728352	0.412287	0.972327	0.20872	0.964534	1.35704e-05
GO:0003824	catalytic activity	679	179	193	94	0.884727	0.0470986	0.978611	0.066471	0.975194	0.000946032
GO:0006355	regulation of transcription, DNA-templated	1346	369	390	188	0.9006	0.258904	0.979106	0.837736	0.996569	9.12382e-05
GO:0015991		41	6	14	4	0.249897	0.0167197	0.980426	0.419642	1	0.290521
GO:0005622	intracellular anatomical structure	423	107	125	51	0.659232	0.191047	0.980577	0.0926914	0.994931	0.0028743
GO:0016616	oxidoreductase activity, acting on the CH-OH group of donors, NAD or NADP as acceptor	127	27	40	15	0.37154	0.680132	0.981722	0.786616	0.91529	0.195983
GO:0051082	unfolded protein binding	72	13	16	7	0.924421	0.0841462	0.984154	0.0224621	0.928998	0
GO:0006364	rRNA processing	38	5	11	3	0.50856	0.394685	0.986027	0.857579	1	0
GO:0008565	obsolete protein transporter activity	45	6	16	4	0.18705	0.1955	0.991862	0.150488	1	0
GO:0050662	obsolete coenzyme binding	118	23	21	7	0.998859	0.338084	0.993033	0.190414	0.999567	0.114964
GO:0005737	cytoplasm	288	67	70	33	0.989255	0.4953	0.993132	0.982608	0.991428	0.00306162
GO:0004568	chitinase activity	18	4	8	3	0.0667401	0.21853	1	0	1	0.395716
GO:0006032	chitin catabolic process	18	4	8	3	0.0667401	0.21853	1	0	1	0.395716
GO:0008131	primary amine oxidase activity	13	3	6	1	0.0686991	0.743184	1	0	1	0
GO:0009308	amine metabolic process	13	3	6	1	0.0686991	0.743184	1	0	1	0
GO:0016998	cell wall macromolecule catabolic process	19	4	8	3	0.0933955	0.21853	1	0	1	0.395716
GO:0015743	malate transport	14	1	6	0	0.102103	0.439624	1	0	1	0
GO:0008686	3,4-dihydroxy-2-butanone-4-phosphate synthase activity	12	4	5	3	0.127496	0.0499012	1	0	1	0
GO:0004659	prenyltransferase activity	15	2	6	1	0.142678	0.162413	1	0	1	0.734166
GO:0004045	aminoacyl-tRNA hydrolase activity	15	4	5	3	0.296106	0.0499012	1	0	1	0
GO:0016925	protein sumoylation	15	3	5	2	0.296106	0.0499012	1	0	1	0
GO:0031668	cellular response to extracellular stimulus	15	3	5	2	0.296106	0.0499012	1	0	1	0
GO:0031047	gene silencing by RNA	19	3	5	3	0.548877	0.0499012	1	0	1	0
GO:0000042		2	0	0	0	1	0	1	0	1	0
GO:0000075	cell cycle checkpoint signaling	2	0	0	0	1	0	1	0	1	0
GO:0000077	DNA damage checkpoint signaling	4	1	1	1	1	0.549063	1	0	1	0.734166
GO:0000090	mitotic anaphase	1	0	0	0	1	0	1	0	1	0
GO:0000105	histidine biosynthetic process	12	1	1	0	1	0	1	0	1	0
GO:0000123	histone acetyltransferase complex	6	1	3	1	1	0	1	0	1	0
GO:0000124	SAGA complex	2	0	1	0	1	0.549063	1	0	1	0
GO:0000139	Golgi membrane	15	1	2	0	1	0.30147	1	0	1	0
GO:0000162	tryptophan biosynthetic process	1	0	1	0	1	0.549063	1	0	1	0
GO:0000172	ribonuclease MRP complex	2	1	1	1	1	0	1	0	1	0
GO:0000175	3'-5'-exoribonuclease activity	1	1	1	1	1	0	1	0	1	0
GO:0000176	nuclear exosome (RNase complex)	2	1	1	0	1	0.549063	1	0	1	0
GO:0000178	exosome (RNase complex)	3	1	1	0	1	0	1	0	1	0
GO:0000184	nuclear-transcribed mRNA catabolic process, nonsense-mediated decay	7	2	2	1	1	0	1	0	1	0
GO:0000213	tRNA-intron endonuclease activity	3	1	0	0	1	0	1	0	1	0
GO:0000221	vacuolar proton-transporting V-type ATPase, V1 domain	1	0	0	0	1	0	1	0	1	0
GO:0000266	mitochondrial fission	6	1	0	0	1	0	1	0	1	0
GO:0000278	mitotic cell cycle	1	0	0	0	1	0	1	0	1	0
GO:0000390	spliceosomal complex disassembly	1	0	0	0	1	0	1	0	1	0
GO:0000445	THO complex part of transcription export complex	2	0	2	0	1	0	1	0	1	0
GO:0000502	proteasome complex	4	0	0	0	1	0	1	0	1	0
GO:0000723	telomere maintenance	14	2	2	0	1	0	1	0	1	0
GO:0000784		1	0	1	0	1	0	1	0	1	0
GO:0000808	origin recognition complex	2	0	0	0	1	0	1	0	1	0
GO:0000910	cytokinesis	19	2	3	0	1	0.573358	1	0	1	0
GO:0000930	gamma-tubulin complex	1	1	1	1	1	0	1	0	1	0
GO:0000940	outer kinetochore	1	0	0	0	1	0	1	0	1	0
GO:0000989	obsolete transcription factor activity, transcription factor binding	1	0	0	0	1	0	1	0	1	0
GO:0001671	ATPase activator activity	2	0	0	0	1	0	1	0	1	0
GO:0001735	prenylcysteine oxidase activity	2	0	0	0	1	0	1	0	1	0
GO:0002161	aminoacyl-tRNA editing activity	3	0	0	0	1	0	1	0	1	0
GO:0003689	DNA clamp loader activity	2	2	1	1	1	0	1	0	1	0
GO:0003713	transcription coactivator activity	4	0	1	0	1	0	1	0	1	0
GO:0003725	double-stranded RNA binding	6	0	0	0	1	0	1	0	1	0
GO:0003756	protein disulfide isomerase activity	4	0	1	0	1	0.549063	1	0	1	0
GO:0003830	beta-1,4-mannosylglycoprotein 4-beta-N-acetylglucosaminyltransferase activity	5	1	0	0	1	0	1	0	1	0
GO:0003840	obsolete gamma-glutamyltransferase activity	6	0	0	0	1	0	1	0	1	0
GO:0003848	2-amino-4-hydroxy-6-hydroxymethyldihydropteridine diphosphokinase activity	0	0	0	0	1	0	1	0	1	0
GO:0003849	3-deoxy-7-phosphoheptulonate synthase activity	5	0	2	0	1	0.30147	1	0	1	0
GO:0003852	2-isopropylmalate synthase activity	2	0	0	0	1	0	1	0	1	0
GO:0003856	3-dehydroquinate synthase activity	1	0	0	0	1	0	1	0	1	0
GO:0003864	3-methyl-2-oxobutanoate hydroxymethyltransferase activity	2	0	0	0	1	0	1	0	1	0
GO:0003868	4-hydroxyphenylpyruvate dioxygenase activity	5	1	2	1	1	0	1	0	1	0
GO:0003873	6-phosphofructo-2-kinase activity	4	1	1	1	1	0	1	0	1	0
GO:0003879	ATP phosphoribosyltransferase activity	2	0	0	0	1	0	1	0	1	0
GO:0003883	CTP synthase activity	7	1	3	1	1	0	1	0	1	0
GO:0003885	D-arabinono-1,4-lactone oxidase activity	3	0	1	0	1	0	1	0	1	0
GO:0003904	deoxyribodipyrimidine photo-lyase activity	5	1	3	1	1	0	1	0	1	0
GO:0003905	alkylbase DNA N-glycosylase activity	1	0	0	0	1	0	1	0	1	0
GO:0003906	DNA-(apurinic or apyrimidinic site) endonuclease activity	0	0	0	0	1	0	1	0	1	0
GO:0003910	DNA ligase (ATP) activity	5	3	1	1	1	0.549063	1	0	1	0.734166
GO:0003916	DNA topoisomerase activity	5	1	1	0	1	0	1	0	1	0
GO:0003917	DNA topoisomerase type I (single strand cut, ATP-independent) activity	7	0	3	0	1	0	1	0	1	0
GO:0003919	FMN adenylyltransferase activity	2	1	2	1	1	0	1	0	1	0
GO:0003922	GMP synthase (glutamine-hydrolyzing) activity	1	0	1	0	1	0	1	0	1	0
GO:0003934	GTP cyclohydrolase I activity	1	0	0	0	1	0	1	0	1	0
GO:0003937	IMP cyclohydrolase activity	6	1	1	1	1	0	1	0	1	0
GO:0003954	NADH dehydrogenase activity	2	0	1	0	1	0	1	0	1	0
GO:0003964	RNA-directed DNA polymerase activity	1	0	0	0	1	0	1	0	1	0
GO:0003968	RNA-directed 5'-3' RNA polymerase activity	6	1	1	0	1	0	1	0	1	0
GO:0003972	RNA ligase (ATP) activity	1	1	0	0	1	0	1	0	1	0
GO:0003980	UDP-glucose:glycoprotein glucosyltransferase activity	0	0	0	0	1	0	1	0	1	0
GO:0003997	acyl-CoA oxidase activity	6	0	4	0	1	0.0908843	1	0	1	0
GO:0004000	adenosine deaminase activity	0	0	0	0	1	0	1	0	1	0
GO:0004013	adenosylhomocysteinase activity	4	1	1	1	1	0	1	0	1	0
GO:0004017	adenylate kinase activity	1	0	0	0	1	0	1	0	1	0
GO:0004018	N6-(1,2-dicarboxyethyl)AMP AMP-lyase (fumarate-forming) activity	3	0	1	0	1	0	1	0	1	0
GO:0004019	adenylosuccinate synthase activity	0	0	0	0	1	0	1	0	1	0
GO:0004047	aminomethyltransferase activity	4	0	1	0	1	0.549063	1	0	1	0
GO:0004056	argininosuccinate lyase activity	2	0	0	0	1	0	1	0	1	0
GO:0004061	arylformamidase activity	6	0	2	0	1	0.30147	1	0	1	0
GO:0004066	asparagine synthase (glutamine-hydrolyzing) activity	6	1	1	0	1	0	1	0	1	0
GO:0004096	catalase activity	14	2	3	1	1	0.573358	1	0	1	0
GO:0004106	chorismate mutase activity	5	3	3	3	1	0	1	0	1	0
GO:0004107	chorismate synthase activity	5	1	3	1	1	0.165526	1	0	1	0
GO:0004109	coproporphyrinogen oxidase activity	0	0	0	0	1	0	1	0	1	0
GO:0004112	cyclic-nucleotide phosphodiesterase activity	2	2	2	2	1	0	1	0	1	0
GO:0004126	cytidine deaminase activity	0	0	0	0	1	0	1	0	1	0
GO:0004146	dihydrofolate reductase activity	8	2	4	1	1	0.389452	1	0	1	0
GO:0004151	dihydroorotase activity	3	0	2	0	1	0.30147	1	0	1	0
GO:0004181	metallocarboxypeptidase activity	4	0	1	0	1	0.549063	1	0	1	0
GO:0004198	calcium-dependent cysteine-type endopeptidase activity	5	0	1	0	1	0.549063	1	0	1	0
GO:0004315	3-oxoacyl-[acyl-carrier-protein] synthase activity	0	0	0	0	1	0	1	0	1	0
GO:0004325	ferrochelatase activity	7	0	2	0	1	0.796656	1	0	1	0
GO:0004329	formate-tetrahydrofolate ligase activity	3	0	1	0	1	0	1	0	1	0
GO:0004334	fumarylacetoacetase activity	1	0	0	0	1	0	1	0	1	0
GO:0004347	glucose-6-phosphate isomerase activity	5	3	2	1	1	0.30147	1	0	1	0
GO:0004357	glutamate-cysteine ligase activity	4	1	2	0	1	0.30147	1	0	1	0
GO:0004358	glutamate N-acetyltransferase activity	1	0	0	0	1	0	1	0	1	0
GO:0004360	glutamine-fructose-6-phosphate transaminase (isomerizing) activity	2	0	0	0	1	0	1	0	1	0
GO:0004366	glycerol-3-phosphate O-acyltransferase activity	1	0	1	0	1	0	1	0	1	0
GO:0004379	glycylpeptide N-tetradecanoyltransferase activity	1	0	0	0	1	0	1	0	1	0
GO:0004392	heme oxygenase (decyclizing) activity	2	0	0	0	1	0	1	0	1	0
GO:0004399	histidinol dehydrogenase activity	2	0	0	0	1	0	1	0	1	0
GO:0004411	homogentisate 1,2-dioxygenase activity	4	1	1	0	1	0	1	0	1	0
GO:0004418	hydroxymethylbilane synthase activity	3	0	0	0	1	0	1	0	1	0
GO:0004420	hydroxymethylglutaryl-CoA reductase (NADPH) activity	4	1	1	0	1	0	1	0	1	0
GO:0004421	hydroxymethylglutaryl-CoA synthase activity	4	2	1	1	1	0	1	0	1	0
GO:0004424	imidazoleglycerol-phosphate dehydratase activity	0	0	0	0	1	0	1	0	1	0
GO:0004430	1-phosphatidylinositol 4-kinase activity	4	1	1	0	1	0	1	0	1	0
GO:0004435	phosphatidylinositol phospholipase C activity	6	2	2	1	1	0	1	0	1	0
GO:0004450	isocitrate dehydrogenase (NADP+) activity	7	1	1	0	1	0.549063	1	0	1	0
GO:0004452	isopentenyl-diphosphate delta-isomerase activity	1	1	0	0	1	0	1	0	1	0
GO:0004455	ketol-acid reductoisomerase activity	3	1	1	0	1	0.549063	1	0	1	0
GO:0004474	malate synthase activity	1	0	1	0	1	0	1	0	1	0
GO:0004476	mannose-6-phosphate isomerase activity	1	0	0	0	1	0	1	0	1	0
GO:0004484	mRNA guanylyltransferase activity	2	0	1	0	1	0	1	0	1	0
GO:0004489	methylenetetrahydrofolate reductase (NAD(P)H) activity	0	0	0	0	1	0	1	0	1	0
GO:0004496	mevalonate kinase activity	2	0	0	0	1	0	1	0	1	0
GO:0004514	nicotinate-nucleotide diphosphorylase (carboxylating) activity	3	0	1	0	1	0	1	0	1	0
GO:0004526	ribonuclease P activity	1	0	0	0	1	0	1	0	1	0
GO:0004555	alpha,alpha-trehalase activity	2	0	0	0	1	0	1	0	1	0
GO:0004556	alpha-amylase activity	9	4	3	1	1	0.165526	1	0	1	0
GO:0004559	alpha-mannosidase activity	7	1	2	0	1	0.30147	1	0	1	0
GO:0004560	alpha-L-fucosidase activity	3	2	0	0	1	0	1	0	1	0
GO:0004564	beta-fructofuranosidase activity	5	1	1	1	1	0	1	0	1	0
GO:0004565	beta-galactosidase activity	2	1	0	0	1	0	1	0	1	0
GO:0004571	mannosyl-oligosaccharide 1,2-alpha-mannosidase activity	9	3	2	1	1	0	1	0	1	0
GO:0004575	sucrose alpha-glucosidase activity	5	1	1	1	1	0	1	0	1	0
GO:0004576	oligosaccharyl transferase activity	1	0	0	0	1	0	1	0	1	0
GO:0004590	orotidine-5'-phosphate decarboxylase activity	3	2	0	0	1	0	1	0	1	0
GO:0004591	oxoglutarate dehydrogenase (succinyl-transferring) activity	3	0	2	0	1	0.30147	1	0	1	0
GO:0004592	pantoate-beta-alanine ligase activity	1	0	0	0	1	0	1	0	1	0
GO:0004612	phosphoenolpyruvate carboxykinase (ATP) activity	7	1	0	0	1	0	1	0	1	0
GO:0004615	phosphomannomutase activity	3	1	2	1	1	0.30147	1	0	1	0
GO:0004619	phosphoglycerate mutase activity	6	0	0	0	1	0	1	0	1	0
GO:0004623	phospholipase A2 activity	1	0	0	0	1	0	1	0	1	0
GO:0004635	phosphoribosyl-AMP cyclohydrolase activity	2	0	0	0	1	0	1	0	1	0
GO:0004640	phosphoribosylanthranilate isomerase activity	1	1	0	0	1	0	1	0	1	0
GO:0004643	phosphoribosylaminoimidazolecarboxamide formyltransferase activity	6	1	1	1	1	0	1	0	1	0
GO:0004649	poly(ADP-ribose) glycohydrolase activity	1	0	1	0	1	0.549063	1	0	1	0
GO:0004655	porphobilinogen synthase activity	2	0	1	0	1	0.549063	1	0	1	0
GO:0004657	proline dehydrogenase activity	2	0	1	0	1	0.549063	1	0	1	0
GO:0004664	prephenate dehydratase activity	4	0	0	0	1	0	1	0	1	0
GO:0004665	prephenate dehydrogenase (NADP+) activity	4	0	0	0	1	0	1	0	1	0
GO:0004671	protein C-terminal S-isoprenylcysteine carboxyl O-methyltransferase activity	2	0	0	0	1	0	1	0	1	0
GO:0004712	protein serine/threonine/tyrosine kinase activity	2	0	0	0	1	0	1	0	1	0
GO:0004739	pyruvate dehydrogenase (acetyl-transferring) activity	4	1	2	1	1	0	1	0	1	0
GO:0004746	riboflavin synthase activity	0	0	0	0	1	0	1	0	1	0
GO:0004751	ribose-5-phosphate isomerase activity	6	1	1	1	1	0	1	0	1	0
GO:0004784	superoxide dismutase activity	3	1	0	0	1	0	1	0	1	0
GO:0004789	thiamine-phosphate diphosphorylase activity	1	0	0	0	1	0	1	0	1	0
GO:0004799	thymidylate synthase activity	7	1	3	1	1	0.573358	1	0	1	0
GO:0004806	triglyceride lipase activity	1	0	0	0	1	0	1	0	1	0
GO:0004813	alanine-tRNA ligase activity	10	0	2	0	1	0.796656	1	0	1	0
GO:0004814	arginine-tRNA ligase activity	2	0	0	0	1	0	1	0	1	0
GO:0004816	asparagine-tRNA ligase activity	7	1	3	1	1	0.165526	1	0	1	0
GO:0004819	glutamine-tRNA ligase activity	3	1	1	1	1	0	1	0	1	0
GO:0004820	glycine-tRNA ligase activity	2	0	0	0	1	0	1	0	1	0
GO:0004823	leucine-tRNA ligase activity	0	0	0	0	1	0	1	0	1	0
GO:0004830	tryptophan-tRNA ligase activity	2	0	1	0	1	0	1	0	1	0
GO:0004831	tyrosine-tRNA ligase activity	0	0	0	0	1	0	1	0	1	0
GO:0004832	valine-tRNA ligase activity	3	1	1	1	1	0	1	0	1	0
GO:0004834	tryptophan synthase activity	4	0	2	0	1	0.30147	1	0	1	0
GO:0004852	uroporphyrinogen-III synthase activity	0	0	0	0	1	0	1	0	1	0
GO:0004869	cysteine-type endopeptidase inhibitor activity	7	1	1	0	1	0	1	0	1	0
GO:0004872		1	0	1	0	1	0	1	0	1	0
GO:0004930	G protein-coupled receptor activity	1	0	0	0	1	0	1	0	1	0
GO:0005047	signal recognition particle binding	1	0	0	0	1	0	1	0	1	0
GO:0005085	guanyl-nucleotide exchange factor activity	1	0	1	0	1	0	1	0	1	0
GO:0005315	inorganic phosphate transmembrane transporter activity	1	0	0	0	1	0	1	0	1	0
GO:0005319	lipid transporter activity	1	0	0	0	1	0	1	0	1	0
GO:0005351	carbohydrate:proton symporter activity	10	1	2	0	1	0.30147	1	0	1	0
GO:0005451	monovalent cation:proton antiporter activity	2	0	1	0	1	0.549063	1	0	1	0
GO:0005544	calcium-dependent phospholipid binding	13	3	1	1	1	0	1	0	1	0
GO:0005639	integral component of nuclear inner membrane	3	0	0	0	1	0	1	0	1	0
GO:0005663	DNA replication factor C complex	2	2	1	1	1	0	1	0	1	0
GO:0005664	nuclear origin of replication recognition complex	1	0	0	0	1	0	1	0	1	0
GO:0005666	RNA polymerase III complex	6	1	2	0	1	0.30147	1	0	1	0
GO:0005669	transcription factor TFIID complex	9	2	2	1	1	0.30147	1	0	1	0
GO:0005672	transcription factor TFIIA complex	3	0	1	0	1	0	1	0	1	0
GO:0005730	nucleolus	4	0	0	0	1	0	1	0	1	0
GO:0005732	sno(s)RNA-containing ribonucleoprotein complex	3	0	1	0	1	0	1	0	1	0
GO:0005740	mitochondrial envelope	4	0	0	0	1	0	1	0	1	0
GO:0005742	mitochondrial outer membrane translocase complex	4	0	1	0	1	0.549063	1	0	1	0
GO:0005744	TIM23 mitochondrial import inner membrane translocase complex	5	0	2	0	1	0	1	0	1	0
GO:0005751	mitochondrial respiratory chain complex IV	1	0	0	0	1	0	1	0	1	0
GO:0005758	mitochondrial intermembrane space	5	0	1	0	1	0	1	0	1	0
GO:0005759	mitochondrial matrix	11	4	4	2	1	0.0908843	1	0	1	0.539
GO:0005784	Sec61 translocon complex	3	0	2	0	1	0.796656	1	0	1	0
GO:0005785	signal recognition particle receptor complex	1	0	0	0	1	0	1	0	1	0
GO:0005786	signal recognition particle, endoplasmic reticulum targeting	1	0	0	0	1	0	1	0	1	0
GO:0005788	endoplasmic reticulum lumen	1	0	0	0	1	0	1	0	1	0
GO:0005794	Golgi apparatus	0	0	0	0	1	0	1	0	1	0
GO:0005795	Golgi stack	1	0	1	0	1	0.549063	1	0	1	0
GO:0005829	cytosol	0	0	0	0	1	0	1	0	1	0
GO:0005834	heterotrimeric G-protein complex	5	0	0	0	1	0	1	0	1	0
GO:0005838	proteasome regulatory particle	2	0	0	0	1	0	1	0	1	0
GO:0005847	mRNA cleavage and polyadenylation specificity factor complex	1	0	0	0	1	0	1	0	1	0
GO:0005849	mRNA cleavage factor complex	6	1	0	0	1	0	1	0	1	0
GO:0005850	eukaryotic translation initiation factor 2 complex	3	1	1	1	1	0	1	0	1	0
GO:0005853	eukaryotic translation elongation factor 1 complex	3	1	0	0	1	0	1	0	1	0
GO:0005876	spindle microtubule	1	0	0	0	1	0	1	0	1	0
GO:0005884	actin filament	4	0	2	0	1	0	1	0	1	0
GO:0005887	integral component of plasma membrane	3	0	2	0	1	0.30147	1	0	1	0
GO:0005956	protein kinase CK2 complex	7	3	1	1	1	0	1	0	1	0
GO:0005965	protein farnesyltransferase complex	2	0	0	0	1	0	1	0	1	0
GO:0005991	trehalose metabolic process	2	0	0	0	1	0	1	0	1	0
GO:0006000	fructose metabolic process	4	1	1	1	1	0	1	0	1	0
GO:0006003	fructose 2,6-bisphosphate metabolic process	4	1	1	1	1	0	1	0	1	0
GO:0006007	glucose catabolic process	2	0	0	0	1	0	1	0	1	0
GO:0006012	galactose metabolic process	1	0	0	0	1	0	1	0	1	0
GO:0006013	mannose metabolic process	7	1	2	0	1	0.30147	1	0	1	0
GO:0006086	acetyl-CoA biosynthetic process from pyruvate	4	1	2	1	1	0	1	0	1	0
GO:0006094	gluconeogenesis	12	4	2	1	1	0.30147	1	0	1	0
GO:0006097	glyoxylate cycle	1	0	1	0	1	0	1	0	1	0
GO:0006102	isocitrate metabolic process	7	1	1	0	1	0.549063	1	0	1	0
GO:0006177	GMP biosynthetic process	1	0	1	0	1	0	1	0	1	0
GO:0006188	IMP biosynthetic process	3	0	1	0	1	0	1	0	1	0
GO:0006189	de novo' IMP biosynthetic process	11	1	4	1	1	0.0908843	1	0	1	0
GO:0006207	de novo' pyrimidine nucleobase biosynthetic process	3	2	0	0	1	0	1	0	1	0
GO:0006221	pyrimidine nucleotide biosynthetic process	10	1	3	1	1	0	1	0	1	0
GO:0006231	dTMP biosynthetic process	7	1	3	1	1	0.573358	1	0	1	0
GO:0006275	regulation of DNA replication	2	0	0	0	1	0	1	0	1	0
GO:0006282	regulation of DNA repair	2	0	0	0	1	0	1	0	1	0
GO:0006302	double-strand break repair	2	0	0	0	1	0	1	0	1	0
GO:0006303	double-strand break repair via nonhomologous end joining	2	1	0	0	1	0	1	0	1	0
GO:0006308	DNA catabolic process	0	0	0	0	1	0	1	0	1	0
GO:0006333	chromatin assembly or disassembly	2	1	1	1	1	0	1	0	1	0
GO:0006348		1	0	0	0	1	0	1	0	1	0
GO:0006359	regulation of transcription by RNA polymerase III	3	0	1	0	1	0	1	0	1	0
GO:0006370	7-methylguanosine mRNA capping	2	0	1	0	1	0	1	0	1	0
GO:0006378	mRNA polyadenylation	7	1	0	0	1	0	1	0	1	0
GO:0006379	mRNA cleavage	3	1	1	1	1	0	1	0	1	0
GO:0006383	transcription by RNA polymerase III	6	1	2	0	1	0.30147	1	0	1	0
GO:0006388	tRNA splicing, via endonucleolytic cleavage and ligation	10	3	2	1	1	0.30147	1	0	1	0
GO:0006419	alanyl-tRNA aminoacylation	10	0	2	0	1	0.796656	1	0	1	0
GO:0006420	arginyl-tRNA aminoacylation	2	0	0	0	1	0	1	0	1	0
GO:0006421	asparaginyl-tRNA aminoacylation	7	1	3	1	1	0.165526	1	0	1	0
GO:0006425	glutaminyl-tRNA aminoacylation	3	1	1	1	1	0	1	0	1	0
GO:0006426	glycyl-tRNA aminoacylation	2	0	0	0	1	0	1	0	1	0
GO:0006429	leucyl-tRNA aminoacylation	0	0	0	0	1	0	1	0	1	0
GO:0006436	tryptophanyl-tRNA aminoacylation	2	0	1	0	1	0	1	0	1	0
GO:0006438	valyl-tRNA aminoacylation	3	1	1	1	1	0	1	0	1	0
GO:0006450	regulation of translational fidelity	1	1	0	0	1	0	1	0	1	0
GO:0006461		0	0	0	0	1	0	1	0	1	0
GO:0006471	protein ADP-ribosylation	5	4	1	1	1	0	1	0	1	0
GO:0006481	C-terminal protein methylation	2	0	0	0	1	0	1	0	1	0
GO:0006482	protein demethylation	3	1	3	1	1	0	1	0	1	0
GO:0006487	protein N-linked glycosylation	9	1	0	0	1	0	1	0	1	0
GO:0006491	N-glycan processing	3	1	0	0	1	0	1	0	1	0
GO:0006499	N-terminal protein myristoylation	1	0	0	0	1	0	1	0	1	0
GO:0006505	GPI anchor metabolic process	5	1	0	0	1	0	1	0	1	0
GO:0006527	arginine catabolic process	1	0	1	0	1	0	1	0	1	0
GO:0006529	asparagine biosynthetic process	6	1	1	0	1	0	1	0	1	0
GO:0006545	glycine biosynthetic process	8	2	4	1	1	0.389452	1	0	1	0
GO:0006555	methionine metabolic process	0	0	0	0	1	0	1	0	1	0
GO:0006559	L-phenylalanine catabolic process	4	1	1	0	1	0	1	0	1	0
GO:0006562	proline catabolic process	2	0	1	0	1	0.549063	1	0	1	0
GO:0006568	tryptophan metabolic process	4	1	1	0	1	0	1	0	1	0
GO:0006570	tyrosine metabolic process	4	1	1	0	1	0	1	0	1	0
GO:0006571	tyrosine biosynthetic process	4	0	0	0	1	0	1	0	1	0
GO:0006605	protein targeting	4	1	0	0	1	0	1	0	1	0
GO:0006635	fatty acid beta-oxidation	6	0	4	0	1	0.0908843	1	0	1	0
GO:0006661	phosphatidylinositol biosynthetic process	4	1	1	0	1	0	1	0	1	0
GO:0006725	cellular aromatic compound metabolic process	2	0	0	0	1	0	1	0	1	0
GO:0006729	tetrahydrobiopterin biosynthetic process	5	1	1	0	1	0.549063	1	0	1	0
GO:0006730	one-carbon metabolic process	4	1	1	1	1	0	1	0	1	0
GO:0006744	ubiquinone biosynthetic process	2	0	0	0	1	0	1	0	1	0
GO:0006749	glutathione metabolic process	6	0	0	0	1	0	1	0	1	0
GO:0006777	Mo-molybdopterin cofactor biosynthetic process	1	1	1	1	1	0	1	0	1	0
GO:0006783	heme biosynthetic process	7	0	2	0	1	0.796656	1	0	1	0
GO:0006784	heme A biosynthetic process	1	1	0	0	1	0	1	0	1	0
GO:0006788	heme oxidation	2	0	0	0	1	0	1	0	1	0
GO:0006796	phosphate-containing compound metabolic process	14	0	1	0	1	0	1	0	1	0
GO:0006808	regulation of nitrogen utilization	1	0	0	0	1	0	1	0	1	0
GO:0006813	potassium ion transport	8	1	3	1	1	0.908305	1	0	1	0.734166
GO:0006814	sodium ion transport	2	0	1	0	1	0.549063	1	0	1	0
GO:0006817	phosphate ion transport	1	0	0	0	1	0	1	0	1	0
GO:0006825	copper ion transport	5	0	1	0	1	0	1	0	1	0
GO:0006884	cell volume homeostasis	0	0	0	0	1	0	1	0	1	0
GO:0006893	Golgi to plasma membrane transport	2	0	1	0	1	0.549063	1	0	1	0
GO:0006897	endocytosis	3	1	1	1	1	0	1	0	1	0
GO:0006913	nucleocytoplasmic transport	4	0	2	0	1	0.796656	1	0	1	0
GO:0006974	cellular response to DNA damage stimulus	1	0	1	0	1	0	1	0	1	0
GO:0007015	actin filament organization	7	2	2	2	1	0	1	0	1	0
GO:0007021	tubulin complex assembly	2	0	0	0	1	0	1	0	1	0
GO:0007023	post-chaperonin tubulin folding pathway	2	1	1	1	1	0	1	0	1	0
GO:0007029	endoplasmic reticulum organization	1	0	1	0	1	0	1	0	1	0
GO:0007033	vacuole organization	7	1	1	0	1	0.549063	1	0	1	0
GO:0007059	chromosome segregation	2	0	0	0	1	0	1	0	1	0
GO:0007093	mitotic cell cycle checkpoint signaling	2	0	0	0	1	0	1	0	1	0
GO:0007155	cell adhesion	2	0	0	0	1	0	1	0	1	0
GO:0008022	protein C-terminus binding	0	0	0	0	1	0	1	0	1	0
GO:0008097	5S rRNA binding	6	1	3	1	1	0.165526	1	0	1	0
GO:0008107	galactoside 2-alpha-L-fucosyltransferase activity	7	2	1	0	1	0	1	0	1	0
GO:0008108	UDP-glucose:hexose-1-phosphate uridylyltransferase activity	1	0	0	0	1	0	1	0	1	0
GO:0008124	4-alpha-hydroxytetrahydrobiopterin dehydratase activity	5	1	1	0	1	0.549063	1	0	1	0
GO:0008137	NADH dehydrogenase (ubiquinone) activity	7	2	3	1	1	0	1	0	1	0
GO:0008158	hedgehog receptor activity	3	1	1	0	1	0	1	0	1	0
GO:0008176	tRNA (guanine-N7-)-methyltransferase activity	4	1	3	1	1	0.165526	1	0	1	0
GO:0008193	tRNA guanylyltransferase activity	1	0	0	0	1	0	1	0	1	0
GO:0008198	ferrous iron binding	2	0	0	0	1	0	1	0	1	0
GO:0008237	metallopeptidase activity	15	3	4	3	1	0.0908843	1	0	1	0
GO:0008242	omega peptidase activity	7	2	2	2	1	0	1	0	1	0
GO:0008250	oligosaccharyltransferase complex	7	1	2	1	1	0	1	0	1	0
GO:0008253	5'-nucleotidase activity	4	1	0	0	1	0	1	0	1	0
GO:0008318	protein prenyltransferase activity	4	0	1	0	1	0	1	0	1	0
GO:0008356	asymmetric cell division	1	1	0	0	1	0	1	0	1	0
GO:0008373	sialyltransferase activity	3	0	1	0	1	0	1	0	1	0
GO:0008380	RNA splicing	7	2	2	0	1	0	1	0	1	0
GO:0008381	mechanosensitive ion channel activity	3	0	0	0	1	0	1	0	1	0
GO:0008417	fucosyltransferase activity	6	0	0	0	1	0	1	0	1	0
GO:0008418	protein-N-terminal asparagine amidohydrolase activity	5	2	2	1	1	0.30147	1	0	1	0
GO:0008429	phosphatidylethanolamine binding	1	0	0	0	1	0	1	0	1	0
GO:0008430	selenium binding	2	0	2	0	1	0.30147	1	0	1	0
GO:0008440	inositol-1,4,5-trisphosphate 3-kinase activity	2	0	0	0	1	0	1	0	1	0
GO:0008455	alpha-1,6-mannosylglycoprotein 2-beta-N-acetylglucosaminyltransferase activity	1	0	1	0	1	0.549063	1	0	1	0
GO:0008478	pyridoxal kinase activity	6	2	2	1	1	0.30147	1	0	1	0
GO:0008515	sucrose transmembrane transporter activity	3	0	2	0	1	0.30147	1	0	1	0
GO:0008531	riboflavin kinase activity	5	2	2	1	1	0.30147	1	0	1	0
GO:0008534	oxidized purine nucleobase lesion DNA N-glycosylase activity	1	1	1	1	1	0	1	0	1	0
GO:0008540	proteasome regulatory particle, base subcomplex	4	1	0	0	1	0	1	0	1	0
GO:0008612	peptidyl-lysine modification to peptidyl-hypusine	0	0	0	0	1	0	1	0	1	0
GO:0008643	carbohydrate transport	10	1	2	0	1	0.30147	1	0	1	0
GO:0008649	rRNA methyltransferase activity	1	0	0	0	1	0	1	0	1	0
GO:0008677	2-dehydropantoate 2-reductase activity	1	0	1	0	1	0	1	0	1	0
GO:0008685	2-C-methyl-D-erythritol 2,4-cyclodiphosphate synthase activity	5	0	1	0	1	0.549063	1	0	1	0
GO:0008703	5-amino-6-(5-phosphoribosylamino)uracil reductase activity	1	0	1	0	1	0.549063	1	0	1	0
GO:0008716	D-alanine-D-alanine ligase activity	1	0	0	0	1	0	1	0	1	0
GO:0008757	S-adenosylmethionine-dependent methyltransferase activity	1	1	1	1	1	0	1	0	1	0
GO:0008759	UDP-3-O-[3-hydroxymyristoyl] N-acetylglucosamine deacetylase activity	2	0	0	0	1	0	1	0	1	0
GO:0008762	UDP-N-acetylmuramate dehydrogenase activity	0	0	0	0	1	0	1	0	1	0
GO:0008792	arginine decarboxylase activity	1	0	1	0	1	0	1	0	1	0
GO:0008810	cellulase activity	1	1	0	0	1	0	1	0	1	0
GO:0008837	diaminopimelate epimerase activity	3	0	1	0	1	0	1	0	1	0
GO:0008839	4-hydroxy-tetrahydrodipicolinate reductase	5	2	1	1	1	0	1	0	1	0
GO:0008864	formyltetrahydrofolate deformylase activity	9	1	4	1	1	0.0908843	1	0	1	0
GO:0008883	glutamyl-tRNA reductase activity	4	0	1	0	1	0.549063	1	0	1	0
GO:0008889	glycerophosphodiester phosphodiesterase activity	5	1	0	0	1	0	1	0	1	0
GO:0008909	isochorismate synthase activity	2	0	1	0	1	0	1	0	1	0
GO:0008915	lipid-A-disaccharide synthase activity	0	0	0	0	1	0	1	0	1	0
GO:0008977	prephenate dehydrogenase (NAD+) activity	4	0	0	0	1	0	1	0	1	0
GO:0008987	quinolinate synthetase A activity	1	1	1	1	1	0	1	0	1	0
GO:0009029	tetraacyldisaccharide 4'-kinase activity	2	0	0	0	1	0	1	0	1	0
GO:0009041	uridylate kinase activity	0	0	0	0	1	0	1	0	1	0
GO:0009052	pentose-phosphate shunt, non-oxidative branch	6	1	1	1	1	0	1	0	1	0
GO:0009059	macromolecule biosynthetic process	1	0	0	0	1	0	1	0	1	0
GO:0009060	aerobic respiration	1	0	1	0	1	0	1	0	1	0
GO:0009072	aromatic amino acid family metabolic process	6	1	2	1	1	0	1	0	1	0
GO:0009089	lysine biosynthetic process via diaminopimelate	8	2	2	1	1	0	1	0	1	0
GO:0009094	L-phenylalanine biosynthetic process	4	0	0	0	1	0	1	0	1	0
GO:0009098	leucine biosynthetic process	2	0	0	0	1	0	1	0	1	0
GO:0009107	lipoate biosynthetic process	9	0	2	0	1	0.30147	1	0	1	0
GO:0009186	deoxyribonucleoside diphosphate metabolic process	5	0	0	0	1	0	1	0	1	0
GO:0009236	cobalamin biosynthetic process	6	3	2	0	1	0.796656	1	0	1	0
GO:0009245	lipid A biosynthetic process	4	0	0	0	1	0	1	0	1	0
GO:0009264	deoxyribonucleotide catabolic process	2	0	0	0	1	0	1	0	1	0
GO:0009298	GDP-mannose biosynthetic process	4	1	2	1	1	0.30147	1	0	1	0
GO:0009306	protein secretion	1	0	0	0	1	0	1	0	1	0
GO:0009312	oligosaccharide biosynthetic process	1	0	1	0	1	0.549063	1	0	1	0
GO:0009341	beta-galactosidase complex	2	1	0	0	1	0	1	0	1	0
GO:0009349	riboflavin synthase complex	2	1	1	0	1	0.549063	1	0	1	0
GO:0009408	response to heat	3	0	0	0	1	0	1	0	1	0
GO:0009415	response to water	2	0	0	0	1	0	1	0	1	0
GO:0009439	cyanate metabolic process	0	0	0	0	1	0	1	0	1	0
GO:0009443	pyridoxal 5'-phosphate salvage	6	2	2	1	1	0.30147	1	0	1	0
GO:0009496	plastoquinol--plastocyanin reductase activity	2	1	2	1	1	0.30147	1	0	1	0
GO:0009512	cytochrome b6f complex	2	0	0	0	1	0	1	0	1	0
GO:0009538	photosystem I reaction center	10	2	4	2	1	0.0908843	1	0	1	0
GO:0009539	photosystem II reaction center	2	0	2	0	1	0	1	0	1	0
GO:0009626	plant-type hypersensitive response	2	1	1	1	1	0	1	0	1	0
GO:0009638	phototropism	3	1	2	0	1	0.796656	1	0	1	0
GO:0009690	cytokinin metabolic process	6	1	2	1	1	0.30147	1	0	1	0
GO:0009694	jasmonic acid metabolic process	2	0	0	0	1	0	1	0	1	0
GO:0009742	brassinosteroid mediated signaling pathway	4	0	0	0	1	0	1	0	1	0
GO:0009744	response to sucrose	9	1	2	1	1	0.30147	1	0	1	0.734166
GO:0009834	plant-type secondary cell wall biogenesis	0	0	0	0	1	0	1	0	1	0
GO:0009864	induced systemic resistance, jasmonic acid mediated signaling pathway	2	0	0	0	1	0	1	0	1	0
GO:0009909	regulation of flower development	1	0	0	0	1	0	1	0	1	0
GO:0009910	negative regulation of flower development	2	0	0	0	1	0	1	0	1	0
GO:0009916	alternative oxidase activity	7	0	3	0	1	0	1	0	1	0
GO:0009956	radial pattern formation	1	1	0	0	1	0	1	0	1	0
GO:0009958	positive gravitropism	2	1	0	0	1	0	1	0	1	0
GO:0009972	cytidine deamination	0	0	0	0	1	0	1	0	1	0
GO:0009976	tocopherol cyclase activity	3	1	2	1	1	0.30147	1	0	1	0
GO:0010024	phytochromobilin biosynthetic process	4	0	2	0	1	0.30147	1	0	1	0
GO:0010155	regulation of proton transport	10	1	3	1	1	0	1	0	1	0
GO:0010212	response to ionizing radiation	0	0	0	0	1	0	1	0	1	0
GO:0010223	secondary shoot formation	1	0	1	0	1	0.549063	1	0	1	0
GO:0010309	acireductone dioxygenase [iron(II)-requiring] activity	4	0	3	0	1	0.573358	1	0	1	0
GO:0010338	leaf formation	1	1	1	1	1	0	1	0	1	0
GO:0010508	positive regulation of autophagy	5	1	1	1	1	0	1	0	1	0
GO:0015020	glucuronosyltransferase activity	0	0	0	0	1	0	1	0	1	0
GO:0015105	arsenite transmembrane transporter activity	4	0	1	0	1	0	1	0	1	0
GO:0015444	P-type magnesium transporter activity	2	1	1	1	1	0	1	0	1	0
GO:0015450	protein-transporting ATPase activity	1	0	0	0	1	0	1	0	1	0
GO:0015556	C4-dicarboxylate transmembrane transporter activity	3	0	2	0	1	0.30147	1	0	1	0
GO:0015631	tubulin binding	2	0	0	0	1	0	1	0	1	0
GO:0015700	arsenite transport	4	0	1	0	1	0	1	0	1	0
GO:0015740	C4-dicarboxylate transport	3	0	2	0	1	0.30147	1	0	1	0
GO:0015770	sucrose transport	3	0	2	0	1	0.30147	1	0	1	0
GO:0015923	mannosidase activity	7	1	2	0	1	0.30147	1	0	1	0
GO:0015936	coenzyme A metabolic process	4	1	1	0	1	0	1	0	1	0
GO:0015940	pantothenate biosynthetic process	3	0	0	0	1	0	1	0	1	0
GO:0015969	guanosine tetraphosphate metabolic process	5	2	1	1	1	0	1	0	1	0
GO:0015995	chlorophyll biosynthetic process	5	2	2	0	1	0.30147	1	0	1	0
GO:0015996	chlorophyll catabolic process	2	0	0	0	1	0	1	0	1	0
GO:0016035	zeta DNA polymerase complex	0	0	0	0	1	0	1	0	1	0
GO:0016036	cellular response to phosphate starvation	3	1	0	0	1	0	1	0	1	0
GO:0016070	RNA metabolic process	2	0	0	0	1	0	1	0	1	0
GO:0016117	carotenoid biosynthetic process	7	0	3	0	1	0.908305	1	0	1	0
GO:0016174	NAD(P)H oxidase H2O2-forming activity	1	1	1	1	1	0	1	0	1	0
GO:0016180	snRNA processing	0	0	0	0	1	0	1	0	1	0
GO:0016480	negative regulation of transcription by RNA polymerase III	2	0	1	0	1	0.549063	1	0	1	0
GO:0016531	copper chaperone activity	5	0	1	0	1	0	1	0	1	0
GO:0016532	superoxide dismutase copper chaperone activity	5	1	2	1	1	0	1	0	1	0
GO:0016558	protein import into peroxisome matrix	1	0	0	0	1	0	1	0	1	0
GO:0016560	protein import into peroxisome matrix, docking	6	0	2	0	1	0.30147	1	0	1	0
GO:0016575	histone deacetylation	0	0	0	0	1	0	1	0	1	0
GO:0016636	oxidoreductase activity, acting on the CH-CH group of donors, iron-sulfur protein as acceptor	4	0	2	0	1	0.30147	1	0	1	0
GO:0016655	oxidoreductase activity, acting on NAD(P)H, quinone or similar compound as acceptor	7	3	3	2	1	0.165526	1	0	1	0
GO:0016679	oxidoreductase activity, acting on diphenols and related substances as donors	4	1	2	1	1	0.30147	1	0	1	0
GO:0016701	oxidoreductase activity, acting on single donors with incorporation of molecular oxygen	5	1	2	1	1	0	1	0	1	0
GO:0016708	oxidoreductase activity, acting on paired donors, with incorporation or reduction of molecular oxygen, NAD(P)H as one donor, and incorporation of two atoms of oxygen into one donor	2	0	0	0	1	0	1	0	1	0
GO:0016730	oxidoreductase activity, acting on iron-sulfur proteins as donors	2	0	1	0	1	0	1	0	1	0
GO:0016763	pentosyltransferase activity	3	0	1	0	1	0	1	0	1	0
GO:0016780	phosphotransferase activity, for other substituted phosphate groups	6	0	0	0	1	0	1	0	1	0
GO:0016799	hydrolase activity, hydrolyzing N-glycosyl compounds	0	0	0	0	1	0	1	0	1	0
GO:0016832	aldehyde-lyase activity	0	0	0	0	1	0	1	0	1	0
GO:0016833	oxo-acid-lyase activity	6	3	2	2	1	0	1	0	1	0
GO:0016844	strictosidine synthase activity	5	1	3	0	1	0.165526	1	0	1	0
GO:0016846	carbon-sulfur lyase activity	4	2	0	0	1	0	1	0	1	0
GO:0016852	sirohydrochlorin cobaltochelatase activity	1	0	1	0	1	0.549063	1	0	1	0
GO:0016857	racemase and epimerase activity, acting on carbohydrates and derivatives	4	1	1	1	1	0	1	0	1	0
GO:0016872	intramolecular lyase activity	4	2	1	0	1	0.549063	1	0	1	0
GO:0016876		14	2	3	2	1	0.165526	1	0	1	0
GO:0016879	ligase activity, forming carbon-nitrogen bonds	2	0	1	0	1	0.549063	1	0	1	0
GO:0016881	acid-amino acid ligase activity	2	1	0	0	1	0	1	0	1	0
GO:0016901	oxidoreductase activity, acting on the CH-OH group of donors, quinone or similar compound as acceptor	1	0	0	0	1	0	1	0	1	0
GO:0016973	poly(A)+ mRNA export from nucleus	2	0	0	0	1	0	1	0	1	0
GO:0016992	lipoate synthase activity	9	0	2	0	1	0.30147	1	0	1	0
GO:0017009	protein-phycocyanobilin linkage	1	1	1	1	1	0	1	0	1	0
GO:0017038	protein import	6	0	1	0	1	0.549063	1	0	1	0
GO:0017056	structural constituent of nuclear pore	3	1	3	1	1	0.908305	1	0	1	0.734166
GO:0017070	U6 snRNA binding	2	0	0	0	1	0	1	0	1	0
GO:0017108	5'-flap endonuclease activity	0	0	0	0	1	0	1	0	1	0
GO:0017148	negative regulation of translation	2	0	0	0	1	0	1	0	1	0
GO:0017150	tRNA dihydrouridine synthase activity	4	1	1	1	1	0	1	0	1	0
GO:0017183	peptidyl-diphthamide biosynthetic process from peptidyl-histidine	1	0	0	0	1	0	1	0	1	0
GO:0018279	protein N-linked glycosylation via asparagine	8	0	1	0	1	0	1	0	1	0
GO:0018342	protein prenylation	4	0	1	0	1	0	1	0	1	0
GO:0018343	protein farnesylation	2	0	0	0	1	0	1	0	1	0
GO:0018580	nitronate monooxygenase activity	1	0	1	0	1	0	1	0	1	0
GO:0018738	S-formylglutathione hydrolase activity	1	0	0	0	1	0	1	0	1	0
GO:0019008	molybdopterin synthase complex	0	0	0	0	1	0	1	0	1	0
GO:0019139	cytokinin dehydrogenase activity	6	1	2	1	1	0.30147	1	0	1	0
GO:0019211	phosphatase activator activity	1	1	1	1	1	0	1	0	1	0
GO:0019236	response to pheromone	2	0	0	0	1	0	1	0	1	0
GO:0019295	coenzyme M biosynthetic process	1	0	0	0	1	0	1	0	1	0
GO:0019310	inositol catabolic process	7	1	1	1	1	0	1	0	1	0
GO:0019370	leukotriene biosynthetic process	2	1	1	1	1	0	1	0	1	0
GO:0019439	aromatic compound catabolic process	2	0	0	0	1	0	1	0	1	0
GO:0019441	tryptophan catabolic process to kynurenine	6	0	2	0	1	0.30147	1	0	1	0
GO:0019478	D-amino acid catabolic process	1	0	1	0	1	0.549063	1	0	1	0
GO:0019509	L-methionine salvage from methylthioadenosine	1	0	0	0	1	0	1	0	1	0
GO:0019781	NEDD8 activating enzyme activity	2	1	0	0	1	0	1	0	1	0
GO:0019825	oxygen binding	3	0	0	0	1	0	1	0	1	0
GO:0019856	pyrimidine nucleobase biosynthetic process	3	0	2	0	1	0.30147	1	0	1	0
GO:0019887	protein kinase regulator activity	7	3	1	1	1	0	1	0	1	0
GO:0019905	syntaxin binding	1	1	0	0	1	0	1	0	1	0
GO:0019985	translesion synthesis	0	0	0	0	1	0	1	0	1	0
GO:0019988	charged-tRNA amino acid modification	0	0	0	0	1	0	1	0	1	0
GO:0022900	electron transport chain	2	0	0	0	1	0	1	0	1	0
GO:0030123	AP-3 adaptor complex	3	0	0	0	1	0	1	0	1	0
GO:0030145	manganese ion binding	9	2	2	1	1	0	1	0	1	0
GO:0030150	protein import into mitochondrial matrix	5	0	2	0	1	0	1	0	1	0
GO:0030154	cell differentiation	2	0	1	0	1	0.549063	1	0	1	0
GO:0030173	integral component of Golgi membrane	2	0	0	0	1	0	1	0	1	0
GO:0030176	integral component of endoplasmic reticulum membrane	1	0	0	0	1	0	1	0	1	0
GO:0030234	enzyme regulator activity	5	0	0	0	1	0	1	0	1	0
GO:0030245	cellulose catabolic process	1	1	0	0	1	0	1	0	1	0
GO:0030259	lipid glycosylation	4	0	0	0	1	0	1	0	1	0
GO:0030337	DNA polymerase processivity factor activity	2	0	0	0	1	0	1	0	1	0
GO:0030410	nicotianamine synthase activity	5	1	3	1	1	0.165526	1	0	1	0
GO:0030418	nicotianamine biosynthetic process	5	1	3	1	1	0.165526	1	0	1	0
GO:0030515	snoRNA binding	3	0	0	0	1	0	1	0	1	0
GO:0030532	small nuclear ribonucleoprotein complex	6	1	2	0	1	0	1	0	1	0
GO:0030598	rRNA N-glycosylase activity	2	0	0	0	1	0	1	0	1	0
GO:0030604	1-deoxy-D-xylulose-5-phosphate reductoisomerase activity	4	1	3	1	1	0	1	0	1	0
GO:0030623	U5 snRNA binding	1	0	0	0	1	0	1	0	1	0
GO:0030674	protein-macromolecule adaptor activity	0	0	0	0	1	0	1	0	1	0
GO:0030677	ribonuclease P complex	2	1	1	1	1	0	1	0	1	0
GO:0030688	preribosome, small subunit precursor	1	0	1	0	1	0.549063	1	0	1	0
GO:0030870	Mre11 complex	2	0	0	0	1	0	1	0	1	0
GO:0030896	checkpoint clamp complex	4	1	1	1	1	0.549063	1	0	1	0.734166
GO:0030904	retromer complex	8	0	3	0	1	0.573358	1	0	1	0
GO:0030942	endoplasmic reticulum signal peptide binding	1	0	0	0	1	0	1	0	1	0
GO:0031023	microtubule organizing center organization	3	1	2	1	1	0.30147	1	0	1	0
GO:0031083	BLOC-1 complex	4	1	2	1	1	0.30147	1	0	1	0
GO:0031110	regulation of microtubule polymerization or depolymerization	1	0	0	0	1	0	1	0	1	0
GO:0031122	cytoplasmic microtubule organization	1	1	1	1	1	0	1	0	1	0
GO:0031145	anaphase-promoting complex-dependent catabolic process	1	0	0	0	1	0	1	0	1	0
GO:0031204	posttranslational protein targeting to membrane, translocation	3	2	1	1	1	0	1	0	1	0
GO:0031429	box H/ACA snoRNP complex	3	1	1	0	1	0.549063	1	0	1	0
GO:0031966	mitochondrial membrane	0	0	0	0	1	0	1	0	1	0
GO:0032039	integrator complex	0	0	0	0	1	0	1	0	1	0
GO:0032324	molybdopterin cofactor biosynthetic process	3	0	1	0	1	0	1	0	1	0
GO:0032465	regulation of cytokinesis	1	0	0	0	1	0	1	0	1	0
GO:0032542	sulfiredoxin activity	1	0	1	0	1	0.549063	1	0	1	0
GO:0032784	regulation of DNA-templated transcription, elongation	8	1	2	0	1	0	1	0	1	0
GO:0032955	regulation of division septum assembly	1	0	0	0	1	0	1	0	1	0
GO:0032968	positive regulation of transcription elongation from RNA polymerase II promoter	7	0	1	0	1	0	1	0	1	0
GO:0033014	tetrapyrrole biosynthetic process	9	0	2	0	1	0.796656	1	0	1	0
GO:0033180	proton-transporting V-type ATPase, V1 domain	5	0	1	0	1	0	1	0	1	0
GO:0033314	mitotic DNA replication checkpoint signaling	0	0	0	0	1	0	1	0	1	0
GO:0033567	DNA replication, Okazaki fragment processing	0	0	0	0	1	0	1	0	1	0
GO:0033617	mitochondrial cytochrome c oxidase assembly	1	1	0	0	1	0	1	0	1	0
GO:0033699	DNA 5'-adenosine monophosphate hydrolase activity	3	1	1	0	1	0	1	0	1	0
GO:0033925	mannosyl-glycoprotein endo-beta-N-acetylglucosaminidase activity	4	1	0	0	1	0	1	0	1	0
GO:0034061	DNA polymerase activity	2	1	2	1	1	0.796656	1	0	1	0.734166
GO:0034220	ion transmembrane transport	0	0	0	0	1	0	1	0	1	0
GO:0034227	tRNA thio-modification	2	0	1	0	1	0	1	0	1	0
GO:0034457	Mpp10 complex	3	0	1	0	1	0	1	0	1	0
GO:0034464	BBSome	0	0	0	0	1	0	1	0	1	0
GO:0034477	U6 snRNA 3'-end processing	1	0	0	0	1	0	1	0	1	0
GO:0034551	mitochondrial respiratory chain complex III assembly	2	0	1	0	1	0.549063	1	0	1	0
GO:0034709	methylosome	0	0	0	0	1	0	1	0	1	0
GO:0034715	pICln-Sm protein complex	0	0	0	0	1	0	1	0	1	0
GO:0035058		0	0	0	0	1	0	1	0	1	0
GO:0035246	peptidyl-arginine N-methylation	6	2	4	1	1	0.0908843	1	0	1	0
GO:0035299	inositol pentakisphosphate 2-kinase activity	1	0	0	0	1	0	1	0	1	0
GO:0036092	phosphatidylinositol-3-phosphate biosynthetic process	5	0	1	0	1	0.549063	1	0	1	0
GO:0036361	racemase activity, acting on amino acids and derivatives	0	0	0	0	1	0	1	0	1	0
GO:0042127	regulation of cell population proliferation	2	0	0	0	1	0	1	0	1	0
GO:0042162	telomeric DNA binding	0	0	0	0	1	0	1	0	1	0
GO:0042176	regulation of protein catabolic process	4	0	0	0	1	0	1	0	1	0
GO:0042256	mature ribosome assembly	4	1	2	1	1	0	1	0	1	0
GO:0042274	ribosomal small subunit biogenesis	1	0	1	0	1	0.549063	1	0	1	0
GO:0042301	phosphate ion binding	3	1	1	1	1	0	1	0	1	0
GO:0042398	cellular modified amino acid biosynthetic process	4	1	2	0	1	0.30147	1	0	1	0
GO:0042450	arginine biosynthetic process via ornithine	2	0	0	0	1	0	1	0	1	0
GO:0042546	cell wall biogenesis	7	2	1	0	1	0	1	0	1	0
GO:0042558	pteridine-containing compound metabolic process	0	0	0	0	1	0	1	0	1	0
GO:0042742	defense response to bacterium	2	1	2	1	1	0	1	0	1	0
GO:0042752	regulation of circadian rhythm	4	0	1	0	1	0.549063	1	0	1	0
GO:0042761	very long-chain fatty acid biosynthetic process	2	0	1	0	1	0.549063	1	0	1	0
GO:0042819	vitamin B6 biosynthetic process	3	0	1	0	1	0	1	0	1	0
GO:0042823	pyridoxal phosphate biosynthetic process	3	0	1	0	1	0	1	0	1	0
GO:0043043	peptide biosynthetic process	2	0	0	0	1	0	1	0	1	0
GO:0043047	single-stranded telomeric DNA binding	1	0	1	0	1	0	1	0	1	0
GO:0043085	positive regulation of catalytic activity	2	0	0	0	1	0	1	0	1	0
GO:0043087	regulation of GTPase activity	1	0	0	0	1	0	1	0	1	0
GO:0043139	5'-3' DNA helicase activity	3	0	1	0	1	0	1	0	1	0
GO:0043140		2	0	0	0	1	0	1	0	1	0
GO:0043142		0	0	0	0	1	0	1	0	1	0
GO:0043231	intracellular membrane-bounded organelle	1	1	1	1	1	0	1	0	1	0
GO:0043240	Fanconi anaemia nuclear complex	2	0	1	0	1	0.549063	1	0	1	0
GO:0043399	tRNA A64-2'-O-ribosylphosphate transferase activity	0	0	0	0	1	0	1	0	1	0
GO:0043419	urea catabolic process	2	0	0	0	1	0	1	0	1	0
GO:0043461	proton-transporting ATP synthase complex assembly	2	0	0	0	1	0	1	0	1	0
GO:0043486	histone exchange	1	0	0	0	1	0	1	0	1	0
GO:0043562	cellular response to nitrogen levels	9	1	2	1	1	0.30147	1	0	1	0.734166
GO:0043564	Ku70:Ku80 complex	0	0	0	0	1	0	1	0	1	0
GO:0043966	histone H3 acetylation	1	0	0	0	1	0	1	0	1	0
GO:0043967	histone H4 acetylation	2	1	1	1	1	0	1	0	1	0
GO:0043968	histone H2A acetylation	2	1	1	1	1	0	1	0	1	0
GO:0044030	regulation of DNA methylation	2	0	0	0	1	0	1	0	1	0
GO:0044599	AP-5 adaptor complex	1	0	0	0	1	0	1	0	1	0
GO:0045010	actin nucleation	4	0	2	0	1	0	1	0	1	0
GO:0045039	protein insertion into mitochondrial inner membrane	2	0	0	0	1	0	1	0	1	0
GO:0045040	protein insertion into mitochondrial outer membrane	3	0	1	0	1	0.549063	1	0	1	0
GO:0045116	protein neddylation	2	1	0	0	1	0	1	0	1	0
GO:0045131	pre-mRNA branch point binding	1	0	0	0	1	0	1	0	1	0
GO:0045132	meiotic chromosome segregation	7	1	3	0	1	0	1	0	1	0
GO:0045263	proton-transporting ATP synthase complex, coupling factor F(o)	3	1	2	1	1	0	1	0	1	0
GO:0045492	xylan biosynthetic process	0	0	0	0	1	0	1	0	1	0
GO:0045739	positive regulation of DNA repair	0	0	0	0	1	0	1	0	1	0
GO:0045747	positive regulation of Notch signaling pathway	3	0	0	0	1	0	1	0	1	0
GO:0045892	negative regulation of transcription, DNA-templated	2	1	1	1	1	0	1	0	1	0
GO:0045893	positive regulation of transcription, DNA-templated	4	2	1	0	1	0.549063	1	0	1	0
GO:0045910	negative regulation of DNA recombination	0	0	0	0	1	0	1	0	1	0
GO:0046080	dUTP metabolic process	1	0	1	0	1	0.549063	1	0	1	0
GO:0046294	formaldehyde catabolic process	1	0	0	0	1	0	1	0	1	0
GO:0046373	L-arabinose metabolic process	8	3	3	1	1	0	1	0	1	0
GO:0046422	violaxanthin de-epoxidase activity	2	0	0	0	1	0	1	0	1	0
GO:0046429	4-hydroxy-3-methylbut-2-en-1-yl diphosphate synthase activity	10	0	0	0	1	0	1	0	1	0
GO:0046556	alpha-L-arabinofuranosidase activity	8	3	3	1	1	0	1	0	1	0
GO:0046654	tetrahydrofolate biosynthetic process	1	0	0	0	1	0	1	0	1	0
GO:0046912	acyltransferase, acyl groups converted into alkyl on transfer	16	0	2	0	1	0	1	0	1	0
GO:0047746	chlorophyllase activity	2	0	0	0	1	0	1	0	1	0
GO:0048278	vesicle docking	1	0	1	0	1	0.549063	1	0	1	0
GO:0048280	vesicle fusion with Golgi apparatus	3	0	0	0	1	0	1	0	1	0
GO:0048316	seed development	2	1	0	0	1	0	1	0	1	0
GO:0048366	leaf development	1	1	0	0	1	0	1	0	1	0
GO:0048478	replication fork protection	1	0	1	0	1	0	1	0	1	0
GO:0048481	plant ovule development	2	1	0	0	1	0	1	0	1	0
GO:0048513	animal organ development	4	1	1	0	1	0.549063	1	0	1	0
GO:0048573	photoperiodism, flowering	1	0	0	0	1	0	1	0	1	0
GO:0050113	inositol oxygenase activity	7	1	1	1	1	0	1	0	1	0
GO:0050290	sphingomyelin phosphodiesterase D activity	1	0	1	0	1	0.549063	1	0	1	0
GO:0050515	4-(cytidine 5'-diphospho)-2-C-methyl-D-erythritol kinase activity	3	1	1	1	1	0	1	0	1	0
GO:0050821	protein stabilization	3	1	1	1	1	0	1	0	1	0
GO:0050826	response to freezing	2	0	1	0	1	0.549063	1	0	1	0
GO:0050832	defense response to fungus	2	1	2	1	1	0	1	0	1	0
GO:0050897	cobalt ion binding	4	0	2	0	1	0.30147	1	0	1	0
GO:0050999	regulation of nitric-oxide synthase activity	0	0	0	0	1	0	1	0	1	0
GO:0051015	actin filament binding	3	1	1	1	1	0	1	0	1	0
GO:0051028	mRNA transport	2	0	0	0	1	0	1	0	1	0
GO:0051090	regulation of DNA-binding transcription factor activity	4	1	0	0	1	0	1	0	1	0
GO:0051259	protein complex oligomerization	3	0	0	0	1	0	1	0	1	0
GO:0051297		1	0	0	0	1	0	1	0	1	0
GO:0051301	cell division	2	0	0	0	1	0	1	0	1	0
GO:0051304	chromosome separation	2	0	0	0	1	0	1	0	1	0
GO:0051321	meiotic cell cycle	1	1	0	0	1	0	1	0	1	0
GO:0051499	D-aminoacyl-tRNA deacylase activity	0	0	0	0	1	0	1	0	1	0
GO:0051539	4 iron, 4 sulfur cluster binding	13	1	3	1	1	0.165526	1	0	1	0
GO:0051568	histone H3-K4 methylation	0	0	0	0	1	0	1	0	1	0
GO:0051726	regulation of cell cycle	3	2	1	1	1	0	1	0	1	0
GO:0052689	carboxylic ester hydrolase activity	3	1	3	1	1	0	1	0	1	0
GO:0052855	ADP-dependent NAD(P)H-hydrate dehydratase activity	5	0	1	0	1	0.549063	1	0	1	0
GO:0052861	glucan endo-1,3-beta-glucanase activity, C-3 substituted reducing group	1	0	0	0	1	0	1	0	1	0
GO:0052862	glucan endo-1,4-beta-glucanase activity, C-3 substituted reducing group	1	0	0	0	1	0	1	0	1	0
GO:0052866	phosphatidylinositol phosphate phosphatase activity	6	4	4	4	1	0	1	0	1	0
GO:0060918	auxin transport	2	1	0	0	1	0	1	0	1	0
GO:0070008	serine-type exopeptidase activity	7	1	0	0	1	0	1	0	1	0
GO:0070072	vacuolar proton-transporting V-type ATPase complex assembly	6	1	2	1	1	0	1	0	1	0
GO:0070188	obsolete Stn1-Ten1 complex	1	0	0	0	1	0	1	0	1	0
GO:0070402	NADPH binding	4	1	3	1	1	0	1	0	1	0
GO:0070403	NAD+ binding	5	2	0	0	1	0	1	0	1	0
GO:0070469	respirasome	0	0	0	0	1	0	1	0	1	0
GO:0070481	nuclear-transcribed mRNA catabolic process, non-stop decay	2	0	0	0	1	0	1	0	1	0
GO:0070531	BRCA1-A complex	0	0	0	0	1	0	1	0	1	0
GO:0070552	BRISC complex	0	0	0	0	1	0	1	0	1	0
GO:0070652	HAUS complex	5	1	1	0	1	0.549063	1	0	1	0
GO:0070966	nuclear-transcribed mRNA catabolic process, no-go decay	2	0	0	0	1	0	1	0	1	0
GO:0070985	transcription factor TFIIK complex	4	0	1	0	1	0	1	0	1	0
GO:0071008	U2-type post-mRNA release spliceosomal complex	1	0	0	0	1	0	1	0	1	0
GO:0071025	RNA surveillance	2	0	0	0	1	0	1	0	1	0
GO:0071705	nitrogen compound transport	4	0	0	0	1	0	1	0	1	0
GO:0071816	tail-anchored membrane protein insertion into ER membrane	0	0	0	0	1	0	1	0	1	0
GO:0072588	box H/ACA RNP complex	3	0	0	0	1	0	1	0	1	0
GO:0080048	GDP-D-glucose phosphorylase activity	5	2	2	1	1	0	1	0	1	0
GO:0080123	jasmonate-amino synthetase activity	2	0	0	0	1	0	1	0	1	0
GO:0098519	nucleotide phosphatase activity, acting on free nucleotides	1	0	1	0	1	0.549063	1	0	1	0
GO:0098599	palmitoyl hydrolase activity	7	0	0	0	1	0	1	0	1	0
GO:1901137	carbohydrate derivative biosynthetic process	2	0	0	0	1	0	1	0	1	0
GO:1902358	sulfate transmembrane transport	1	0	0	0	1	0	1	0	1	0
GO:2000029	regulation of proanthocyanidin biosynthetic process	2	1	0	0	1	0	1	0	1	0
GO:0051205	protein insertion into membrane	13	4	6	2	0.0686991	0.162413	1	0.084474	1	0
GO:0048038	quinone binding	15	4	6	1	0.142678	0.743184	1	0.084474	1	0
GO:0019789	SUMO transferase activity	16	4	6	3	0.189616	0.162413	1	0.084474	1	0
GO:0016853	isomerase activity	24	4	7	1	0.460849	0.0150437	1	0.084474	1	0
GO:0004499	N,N-dimethylaniline monooxygenase activity	6	4	4	2	1	0.757265	1	0.084474	1	0
GO:0004618	phosphoglycerate kinase activity	10	4	4	2	1	0.389452	1	0.084474	1	0
GO:0006122	mitochondrial electron transport, ubiquinol to cytochrome c	10	4	1	0	1	0.549063	1	0.084474	1	0
GO:0006621	protein retention in ER lumen	11	4	1	0	1	0.549063	1	0.084474	1	0
GO:0007186	G protein-coupled receptor signaling pathway	22	4	2	2	1	0.30147	1	0.084474	1	0
GO:0016888	endodeoxyribonuclease activity, producing 5'-phosphomonoesters	5	4	2	2	1	0.30147	1	0.084474	1	0
GO:0019001	guanyl nucleotide binding	14	4	2	2	1	0.30147	1	0.084474	1	0
GO:0030042	actin filament depolymerization	19	4	3	1	1	0.165526	1	0.084474	1	0.734166
GO:0031012	extracellular matrix	14	4	4	2	1	0.757265	1	0.084474	1	0
GO:0031683	G-protein beta/gamma-subunit complex binding	14	4	2	2	1	0.30147	1	0.084474	1	0
GO:0032259	methylation	14	4	3	2	1	0.165526	1	0.084474	1	0
GO:0032300	mismatch repair complex	6	4	1	1	1	0	1	0.084474	1	0
GO:0046540	U4/U6 x U5 tri-snRNP complex	5	4	3	3	1	0.165526	1	0.084474	1	0
GO:0046923	ER retention sequence binding	11	4	1	0	1	0.549063	1	0.084474	1	0
GO:0016811	hydrolase activity, acting on carbon-nitrogen (but not peptide) bonds, in linear amides	14	3	7	3	0.0352951	0.314619	1	0.15669	1	0
GO:0009165	nucleotide biosynthetic process	11	3	5	1	0.0851407	0.254817	1	0.15669	1	0
GO:0000775	chromosome, centromeric region	14	3	6	1	0.102103	0.162413	1	0.15669	1	0
GO:0016226	iron-sulfur cluster assembly	16	3	5	3	0.360001	0.254817	1	0.15669	1	0
GO:0016114	terpenoid biosynthetic process	29	3	5	1	0.917663	0.0499012	1	0.15669	1	0
GO:0000148	1,3-beta-D-glucan synthase complex	25	3	4	0	1	0.389452	1	0.15669	1	0
GO:0000244	spliceosomal tri-snRNP complex assembly	4	3	2	2	1	0.30147	1	0.15669	1	0
GO:0000387	spliceosomal snRNP assembly	5	3	2	2	1	0.30147	1	0.15669	1	0
GO:0003843	1,3-beta-D-glucan synthase activity	25	3	4	0	1	0.389452	1	0.15669	1	0
GO:0004097	catechol oxidase activity	6	3	2	1	1	0	1	0.15669	1	0
GO:0004124	cysteine synthase activity	8	3	4	2	1	0.389452	1	0.15669	1	0
GO:0004129	cytochrome-c oxidase activity	13	3	1	0	1	0	1	0.15669	1	0
GO:0004177	aminopeptidase activity	11	3	3	0	1	0.165526	1	0.15669	1	0
GO:0004363	glutathione synthase activity	4	3	2	2	1	0	1	0.15669	1	0
GO:0004451	isocitrate lyase activity	3	3	1	1	1	0	1	0.15669	1	0
GO:0004540	ribonuclease activity	10	3	1	1	1	0	1	0.15669	1	0
GO:0004719	protein-L-isoaspartate (D-aspartate) O-methyltransferase activity	4	3	2	2	1	0.30147	1	0.15669	1	0
GO:0004721	phosphoprotein phosphatase activity	9	3	2	2	1	0.30147	1	0.15669	1	0
GO:0005199	structural constituent of cell wall	3	3	2	2	1	0	1	0.15669	1	0
GO:0006075	(1-&gt;3)-beta-D-glucan biosynthetic process	25	3	4	0	1	0.389452	1	0.15669	1	0
GO:0006164	purine nucleotide biosynthetic process	10	3	4	2	1	0.0908843	1	0.15669	1	0
GO:0006750	glutathione biosynthetic process	4	3	2	2	1	0	1	0.15669	1	0
GO:0007131	reciprocal meiotic recombination	4	3	1	1	1	0	1	0.15669	1	0
GO:0008121	ubiquinol-cytochrome-c reductase activity	7	3	2	1	1	0.796656	1	0.15669	1	0
GO:0009432	SOS response	7	3	4	3	1	0.389452	1	0.15669	1	0.395716
GO:0016568		12	3	4	2	1	0.757265	1	0.15669	1	0
GO:0016851	magnesium chelatase activity	9	3	2	0	1	0.30147	1	0.15669	1	0
GO:0016891	endoribonuclease activity, producing 5'-phosphomonoesters	6	3	3	2	1	0.573358	1	0.15669	1	0
GO:0019499	cyanide metabolic process	8	3	4	2	1	0.389452	1	0.15669	1	0
GO:0019843	rRNA binding	19	3	3	1	1	0.165526	1	0.15669	1	0
GO:0031167	rRNA methylation	6	3	2	2	1	0.30147	1	0.15669	1	0
GO:0032777	Piccolo NuA4 histone acetyltransferase complex	5	3	1	1	1	0	1	0.15669	1	0
GO:0032957	inositol trisphosphate metabolic process	11	3	4	2	1	0.389452	1	0.15669	1	0
GO:0043022	ribosome binding	8	3	4	2	1	0.0908843	1	0.15669	1	0
GO:0043039	tRNA aminoacylation	18	3	4	2	1	0.389452	1	0.15669	1	0
GO:0044238	primary metabolic process	4	3	3	3	1	0.573358	1	0.15669	1	0.395716
GO:0047325	inositol tetrakisphosphate 1-kinase activity	11	3	4	2	1	0.389452	1	0.15669	1	0
GO:0050017	L-3-cyanoalanine synthase activity	8	3	4	2	1	0.389452	1	0.15669	1	0
GO:0051225	spindle assembly	9	3	4	2	1	0.757265	1	0.15669	1	0
GO:0051276	chromosome organization	13	3	3	1	1	0	1	0.15669	1	0
GO:0052725	inositol-1,3,4-trisphosphate 6-kinase activity	11	3	4	2	1	0.389452	1	0.15669	1	0
GO:0052726	inositol-1,3,4-trisphosphate 5-kinase activity	11	3	4	2	1	0.389452	1	0.15669	1	0
GO:0070461	SAGA-type complex	11	2	5	1	0.0851407	0.591404	1	0.290644	1	0
GO:0000126	transcription factor TFIIIB complex	3	2	1	1	1	0	1	0.290644	1	0
GO:0000151	ubiquitin ligase complex	10	2	2	0	1	0.796656	1	0.290644	1	0
GO:0000275	mitochondrial proton-transporting ATP synthase complex, catalytic sector F(1)	6	2	1	0	1	0.549063	1	0.290644	1	0
GO:0000439	transcription factor TFIIH core complex	11	2	3	1	1	0.573358	1	0.290644	1	0
GO:0000724	double-strand break repair via homologous recombination	3	2	2	2	1	0.30147	1	0.290644	1	0
GO:0000796	condensin complex	5	2	0	0	1	0	1	0.290644	1	0
GO:0001510	RNA methylation	7	2	2	2	1	0.30147	1	0.290644	1	0
GO:0003923	GPI-anchor transamidase activity	2	2	1	1	1	0	1	0.290644	1	0
GO:0003938	IMP dehydrogenase activity	3	2	2	1	1	0.30147	1	0.290644	1	0
GO:0004003		7	2	1	1	1	0.549063	1	0.290644	1	0
GO:0004077	biotin-[acetyl-CoA-carboxylase] ligase activity	4	2	2	1	1	0.30147	1	0.290644	1	0
GO:0004143	diacylglycerol kinase activity	20	2	0	0	1	0	1	0.290644	1	0
GO:0004583	dolichyl-phosphate-glucose-glycolipid alpha-glucosyltransferase activity	3	2	1	1	1	0.549063	1	0.290644	1	0
GO:0004602	glutathione peroxidase activity	12	2	1	0	1	0	1	0.290644	1	0
GO:0004668	protein-arginine deiminase activity	3	2	2	1	1	0	1	0.290644	1	0
GO:0004748	ribonucleoside-diphosphate reductase activity, thioredoxin disulfide as acceptor	5	2	3	2	1	0.573358	1	0.290644	1	0
GO:0004809	tRNA (guanine-N2-)-methyltransferase activity	3	2	1	1	1	0.549063	1	0.290644	1	0
GO:0004826	phenylalanine-tRNA ligase activity	4	2	0	0	1	0	1	0.290644	1	0
GO:0004864	protein phosphatase inhibitor activity	2	2	2	2	1	0.30147	1	0.290644	1	0
GO:0005234	extracellularly glutamate-gated ion channel activity	6	2	3	2	1	0.573358	1	0.290644	1	0
GO:0005345	purine nucleobase transmembrane transporter activity	3	2	2	1	1	0	1	0.290644	1	0.734166
GO:0005542	folic acid binding	2	2	2	2	1	0.30147	1	0.290644	1	0
GO:0005576	extracellular region	6	2	0	0	1	0	1	0.290644	1	0
GO:0005615	extracellular space	4	2	1	1	1	0	1	0.290644	1	0
GO:0005665	RNA polymerase II, core complex	2	2	1	1	1	0.549063	1	0.290644	1	0
GO:0005680	anaphase-promoting complex	8	2	2	2	1	0.30147	1	0.290644	1	0
GO:0005750	mitochondrial respiratory chain complex III	6	2	0	0	1	0	1	0.290644	1	0
GO:0005875	microtubule associated complex	12	2	3	2	1	0.165526	1	0.290644	1	0
GO:0005986	sucrose biosynthetic process	12	2	1	1	1	0.549063	1	0.290644	1	0
GO:0006108	malate metabolic process	16	2	4	1	1	0	1	0.290644	1	0
GO:0006384	transcription initiation from RNA polymerase III promoter	3	2	1	1	1	0	1	0.290644	1	0
GO:0006400	tRNA modification	6	2	4	2	1	0.389452	1	0.290644	1	0
GO:0006432	phenylalanyl-tRNA aminoacylation	4	2	0	0	1	0	1	0.290644	1	0
GO:0006452	translational frameshifting	4	2	2	1	1	0.30147	1	0.290644	1	0
GO:0006488	dolichol-linked oligosaccharide biosynthetic process	3	2	1	1	1	0.549063	1	0.290644	1	0
GO:0006644	phospholipid metabolic process	3	2	1	0	1	0	1	0.290644	1	0
GO:0006659	phosphatidylserine biosynthetic process	6	2	2	1	1	0.796656	1	0.290644	1	0
GO:0006672	ceramide metabolic process	7	2	4	2	1	0.389452	1	0.290644	1	0
GO:0006863	purine nucleobase transport	3	2	2	1	1	0	1	0.290644	1	0.734166
GO:0007005	mitochondrion organization	3	2	2	1	1	0.30147	1	0.290644	1	0
GO:0007020	microtubule nucleation	3	2	2	2	1	0.30147	1	0.290644	1	0
GO:0007030	Golgi organization	3	2	2	2	1	0.30147	1	0.290644	1	0
GO:0007031	peroxisome organization	4	2	0	0	1	0	1	0.290644	1	0
GO:0007064	mitotic sister chromatid cohesion	8	2	3	2	1	0	1	0.290644	1	0.539
GO:0007067		8	2	3	1	1	0.573358	1	0.290644	1	0
GO:0007076	mitotic chromosome condensation	7	2	1	0	1	0	1	0.290644	1	0
GO:0007205	protein kinase C-activating G protein-coupled receptor signaling pathway	20	2	0	0	1	0	1	0.290644	1	0
GO:0008081	phosphoric diester hydrolase activity	15	2	2	1	1	0.796656	1	0.290644	1	0
GO:0008083	growth factor activity	6	2	0	0	1	0	1	0.290644	1	0
GO:0008235	metalloexopeptidase activity	4	2	1	0	1	0.549063	1	0.290644	1	0
GO:0008280		8	2	3	2	1	0	1	0.290644	1	0.539
GO:0008283	cell population proliferation	6	2	0	0	1	0	1	0.290644	1	0
GO:0008661	1-deoxy-D-xylulose-5-phosphate synthase activity	11	2	3	0	1	0	1	0.290644	1	0
GO:0008897	holo-[acyl-carrier-protein] synthase activity	3	2	2	2	1	0.796656	1	0.290644	1	0.539
GO:0009082	branched-chain amino acid biosynthetic process	4	2	1	0	1	0.549063	1	0.290644	1	0
GO:0009435	NAD biosynthetic process	7	2	3	2	1	0.165526	1	0.290644	1	0
GO:0009446	putrescine biosynthetic process	3	2	2	1	1	0	1	0.290644	1	0
GO:0009772	photosynthetic electron transport in photosystem II	3	2	1	1	1	0	1	0.290644	1	0
GO:0010430	fatty acid omega-oxidation	3	2	1	1	1	0.549063	1	0.290644	1	0
GO:0012511	monolayer-surrounded lipid storage body	4	2	1	1	1	0	1	0.290644	1	0
GO:0015098	molybdate ion transmembrane transporter activity	10	2	4	1	1	0.757265	1	0.290644	1	0
GO:0015689	molybdate ion transport	10	2	4	1	1	0.757265	1	0.290644	1	0
GO:0016151	nickel cation binding	5	2	3	2	1	0.573358	1	0.290644	1	0
GO:0016272	prefoldin complex	11	2	3	2	1	0.573358	1	0.290644	1	0
GO:0016485	protein processing	9	2	3	2	1	0.165526	1	0.290644	1	0
GO:0016538	cyclin-dependent protein serine/threonine kinase regulator activity	11	2	3	0	1	0.573358	1	0.290644	1	0
GO:0016615	malate dehydrogenase activity	16	2	4	1	1	0	1	0.290644	1	0
GO:0016743	carboxyl- or carbamoyltransferase activity	4	2	1	1	1	0.549063	1	0.290644	1	0
GO:0016765	transferase activity, transferring alkyl or aryl (other than methyl) groups	10	2	4	1	1	0.0908843	1	0.290644	1	0.734166
GO:0017025	TBP-class protein binding	8	2	1	1	1	0	1	0.290644	1	0
GO:0019288	isopentenyl diphosphate biosynthetic process, methylerythritol 4-phosphate pathway	3	2	2	2	1	0	1	0.290644	1	0.539
GO:0019867	outer membrane	7	2	2	0	1	0.30147	1	0.290644	1	0
GO:0030014	CCR4-NOT complex	4	2	1	1	1	0	1	0.290644	1	0
GO:0030915	Smc5-Smc6 complex	5	2	3	2	1	0.165526	1	0.290644	1	0
GO:0031124	mRNA 3'-end processing	4	2	0	0	1	0	1	0.290644	1	0
GO:0032266	phosphatidylinositol-3-phosphate binding	2	2	1	1	1	0.549063	1	0.290644	1	0
GO:0033177	proton-transporting two-sector ATPase complex, proton-transporting domain	11	2	4	2	1	0	1	0.290644	1	0.539
GO:0033179	proton-transporting V-type ATPase, V0 domain	11	2	2	1	1	0.796656	1	0.290644	1	0
GO:0033588	elongator holoenzyme complex	3	2	1	1	1	0.549063	1	0.290644	1	0
GO:0034450	ubiquitin-ubiquitin ligase activity	10	2	2	0	1	0.796656	1	0.290644	1	0
GO:0034599	cellular response to oxidative stress	8	2	0	0	1	0	1	0.290644	1	0
GO:0042549	photosystem II stabilization	6	2	1	1	1	0.549063	1	0.290644	1	0
GO:0043130	ubiquitin binding	2	2	1	1	1	0.549063	1	0.290644	1	0
GO:0043666	regulation of phosphoprotein phosphatase activity	2	2	2	2	1	0.30147	1	0.290644	1	0
GO:0045156	electron transporter, transferring electrons within the cyclic electron transport pathway of photosynthesis activity	3	2	1	1	1	0	1	0.290644	1	0
GO:0045900	negative regulation of translational elongation	3	2	3	2	1	0.908305	1	0.290644	1	0.539
GO:0045901	positive regulation of translational elongation	4	2	2	1	1	0.30147	1	0.290644	1	0
GO:0045905	positive regulation of translational termination	4	2	2	1	1	0.30147	1	0.290644	1	0
GO:0048015	phosphatidylinositol-mediated signaling	8	2	2	1	1	0.30147	1	0.290644	1	0
GO:0050307	sucrose-phosphate phosphatase activity	12	2	1	1	1	0.549063	1	0.290644	1	0
GO:0050664	oxidoreductase activity, acting on NAD(P)H, oxygen as acceptor	6	2	1	1	1	0	1	0.290644	1	0
GO:0050992	dimethylallyl diphosphate biosynthetic process	3	2	2	2	1	0	1	0.290644	1	0.539
GO:0051745	4-hydroxy-3-methylbut-2-en-1-yl diphosphate reductase activity	3	2	2	2	1	0	1	0.290644	1	0.539
GO:0071486	cellular response to high light intensity	8	2	0	0	1	0	1	0.290644	1	0
GO:0071586	CAAX-box protein processing	3	2	0	0	1	0	1	0.290644	1	0
GO:0072546	EMC complex	5	2	2	2	1	0.30147	1	0.290644	1	0
GO:0016742	hydroxymethyl-, formyl- and related transferase activity	12	4	6	3	0.0427857	0.162413	1	0.37334	1	0
GO:0030163	protein catabolic process	10	4	5	3	0.0518563	0.0499012	1	0.37334	1	0
GO:0006541	glutamine metabolic process	13	4	6	3	0.0686991	0.0273989	1	0.37334	1	0
GO:0003871	5-methyltetrahydropteroyltriglutamate-homocysteine S-methyltransferase activity	13	4	5	2	0.177893	0.0499012	1	0.37334	1	0
GO:0009086	methionine biosynthetic process	13	4	5	2	0.177893	0.0499012	1	0.37334	1	0
GO:0004176	ATP-dependent peptidase activity	14	4	5	3	0.234735	0.591404	1	0.37334	1	0
GO:0047134	protein-disulfide reductase (NAD(P)) activity	14	4	5	3	0.234735	0.591404	1	0.37334	1	0.395716
GO:0004402	histone acetyltransferase activity	16	4	5	3	0.360001	0.254817	1	0.37334	1	0
GO:0005741	mitochondrial outer membrane	17	4	5	2	0.424505	0.591404	1	0.37334	1	0.539
GO:0007010	cytoskeleton organization	24	4	7	2	0.460849	0.10153	1	0.37334	1	0
GO:0005761	mitochondrial ribosome	5	4	2	2	1	0	1	0.37334	1	0.539
GO:0006376	mRNA splice site selection	10	4	3	1	1	0.165526	1	0.37334	1	0
GO:0007094	mitotic spindle assembly checkpoint signaling	13	4	2	1	1	0	1	0.37334	1	0
GO:0008725	DNA-3-methyladenine glycosylase activity	12	4	2	1	1	0.30147	1	0.37334	1	0
GO:0016772	transferase activity, transferring phosphorus-containing groups	12	4	3	1	1	0.165526	1	0.37334	1	0
GO:0016791	phosphatase activity	7	4	4	2	1	0.389452	1	0.37334	1	0.539
GO:0016798	hydrolase activity, acting on glycosyl bonds	14	4	2	1	1	0	1	0.37334	1	0
GO:0017053	transcription repressor complex	8	4	4	3	1	0.0908843	1	0.37334	1	0.395716
GO:0019762	glucosinolate catabolic process	5	4	1	1	1	0.549063	1	0.37334	1	0
GO:0033926	glycopeptide alpha-N-acetylgalactosaminidase activity	14	4	3	2	1	0	1	0.37334	1	0
GO:0071704	organic substance metabolic process	8	4	2	1	1	0.30147	1	0.37334	1	0
GO:0080028	nitrile biosynthetic process	5	4	1	1	1	0.549063	1	0.37334	1	0
GO:0006606	protein import into nucleus	13	1	5	0	0.177893	0.0499012	1	0.539114	1	0
GO:0000737	DNA catabolic process, endonucleolytic	3	1	1	1	1	0.549063	1	0.539114	1	0
GO:0001678	cellular glucose homeostasis	8	1	2	0	1	0	1	0.539114	1	0
GO:0001882	nucleoside binding	1	1	1	1	1	0.549063	1	0.539114	1	0
GO:0003857	3-hydroxyacyl-CoA dehydrogenase activity	6	1	3	0	1	0.165526	1	0.539114	1	0
GO:0003942	N-acetyl-gamma-glutamyl-phosphate reductase activity	4	1	2	1	1	0.30147	1	0.539114	1	0.734166
GO:0003951	NAD+ kinase activity	10	1	2	1	1	0.30147	1	0.539114	1	0
GO:0003989	acetyl-CoA carboxylase activity	3	1	1	1	1	0.549063	1	0.539114	1	0
GO:0004055	argininosuccinate synthase activity	2	1	0	0	1	0	1	0.539114	1	0
GO:0004057	arginyltransferase activity	3	1	1	0	1	0.549063	1	0.539114	1	0
GO:0004134	4-alpha-glucanotransferase activity	3	1	1	0	1	0	1	0.539114	1	0
GO:0004140	dephospho-CoA kinase activity	2	1	1	0	1	0	1	0.539114	1	0
GO:0004150	dihydroneopterin aldolase activity	1	1	1	1	1	0.549063	1	0.539114	1	0
GO:0004161	dimethylallyltranstransferase activity	3	1	2	1	1	0.30147	1	0.539114	1	0
GO:0004174	electron-transferring-flavoprotein dehydrogenase activity	1	1	1	1	1	0.549063	1	0.539114	1	0
GO:0004348	glucosylceramidase activity	7	1	1	0	1	0.549063	1	0.539114	1	0
GO:0004371	glycerone kinase activity	7	1	3	0	1	0	1	0.539114	1	0
GO:0004396	hexokinase activity	8	1	2	0	1	0	1	0.539114	1	0
GO:0004417	hydroxyethylthiazole kinase activity	2	1	1	1	1	0.549063	1	0.539114	1	0
GO:0004425	indole-3-glycerol-phosphate synthase activity	1	1	1	1	1	0.549063	1	0.539114	1	0
GO:0004512	inositol-3-phosphate synthase activity	7	1	2	1	1	0.30147	1	0.539114	1	0
GO:0004523	RNA-DNA hybrid ribonuclease activity	2	1	2	1	1	0.796656	1	0.539114	1	0
GO:0004527	exonuclease activity	12	1	3	1	1	0.165526	1	0.539114	1	0
GO:0004550	nucleoside diphosphate kinase activity	8	1	2	1	1	0.30147	1	0.539114	1	0
GO:0004584	obsolete dolichyl-phosphate-mannose-glycolipid alpha-mannosyltransferase activity	2	1	1	1	1	0	1	0.539114	1	0.734166
GO:0004609	phosphatidylserine decarboxylase activity	11	1	2	0	1	0	1	0.539114	1	0
GO:0004637	phosphoribosylamine-glycine ligase activity	2	1	2	1	1	0.796656	1	0.539114	1	0
GO:0004735	pyrroline-5-carboxylate reductase activity	1	1	1	1	1	0.549063	1	0.539114	1	0
GO:0004749	ribose phosphate diphosphokinase activity	3	1	1	0	1	0	1	0.539114	1	0
GO:0004788	thiamine diphosphokinase activity	4	1	1	0	1	0	1	0.539114	1	0
GO:0004844	uracil DNA N-glycosylase activity	1	1	1	1	1	0.549063	1	0.539114	1	0
GO:0004853	uroporphyrinogen decarboxylase activity	4	1	0	0	1	0	1	0.539114	1	0
GO:0005337	nucleoside transmembrane transporter activity	8	1	0	0	1	0	1	0.539114	1	0
GO:0005381	iron ion transmembrane transporter activity	4	1	0	0	1	0	1	0.539114	1	0
GO:0005536	glucose binding	8	1	2	0	1	0	1	0.539114	1	0
GO:0005747	mitochondrial respiratory chain complex I	4	1	1	1	1	0.549063	1	0.539114	1	0
GO:0005778	peroxisomal membrane	8	1	2	0	1	0.30147	1	0.539114	1	0
GO:0006021	inositol biosynthetic process	7	1	2	1	1	0.30147	1	0.539114	1	0
GO:0006071	glycerol metabolic process	7	1	3	0	1	0	1	0.539114	1	0
GO:0006165	nucleoside diphosphate phosphorylation	8	1	2	1	1	0.30147	1	0.539114	1	0
GO:0006183	GTP biosynthetic process	8	1	2	1	1	0.30147	1	0.539114	1	0
GO:0006228	UTP biosynthetic process	8	1	2	1	1	0.30147	1	0.539114	1	0
GO:0006241	CTP biosynthetic process	8	1	2	1	1	0.30147	1	0.539114	1	0
GO:0006259	DNA metabolic process	5	1	1	1	1	0.549063	1	0.539114	1	0
GO:0006353	DNA-templated transcription, termination	5	1	0	0	1	0	1	0.539114	1	0
GO:0006526	arginine biosynthetic process	3	1	0	0	1	0	1	0.539114	1	0
GO:0006561	proline biosynthetic process	1	1	1	1	1	0.549063	1	0.539114	1	0
GO:0006625	protein targeting to peroxisome	2	1	0	0	1	0	1	0.539114	1	0
GO:0006637	acyl-CoA metabolic process	3	1	2	1	1	0.30147	1	0.539114	1	0
GO:0006665	sphingolipid metabolic process	7	1	1	0	1	0.549063	1	0.539114	1	0
GO:0006741	NADP biosynthetic process	10	1	2	1	1	0.30147	1	0.539114	1	0
GO:0006754	ATP biosynthetic process	3	1	0	0	1	0	1	0.539114	1	0
GO:0006760	folic acid-containing compound metabolic process	1	1	1	1	1	0.549063	1	0.539114	1	0
GO:0006779	porphyrin-containing compound biosynthetic process	4	1	0	0	1	0	1	0.539114	1	0
GO:0006826	iron ion transport	6	1	3	0	1	0.573358	1	0.539114	1	0
GO:0006850	mitochondrial pyruvate transmembrane transport	3	1	2	1	1	0.30147	1	0.539114	1	0
GO:0006869	lipid transport	2	1	0	0	1	0	1	0.539114	1	0
GO:0006873	cellular ion homeostasis	3	1	1	1	1	0.549063	1	0.539114	1	0
GO:0006879	cellular iron ion homeostasis	6	1	3	0	1	0.573358	1	0.539114	1	0
GO:0006890	retrograde vesicle-mediated transport, Golgi to endoplasmic reticulum	3	1	1	1	1	0.549063	1	0.539114	1	0
GO:0006891	intra-Golgi vesicle-mediated transport	5	1	1	1	1	0.549063	1	0.539114	1	0
GO:0008026		4	1	1	1	1	0.549063	1	0.539114	1	0
GO:0008170	N-methyltransferase activity	1	1	0	0	1	0	1	0.539114	1	0
GO:0008199	ferric iron binding	6	1	3	0	1	0.573358	1	0.539114	1	0
GO:0008290	F-actin capping protein complex	3	1	2	1	1	0.30147	1	0.539114	1	0
GO:0008308	voltage-gated anion channel activity	3	1	1	1	1	0.549063	1	0.539114	1	0
GO:0008479	queuine tRNA-ribosyltransferase activity	1	1	1	1	1	0.549063	1	0.539114	1	0
GO:0008484	sulfuric ester hydrolase activity	1	1	0	0	1	0	1	0.539114	1	0
GO:0008615	pyridoxine biosynthetic process	8	1	2	1	1	0.796656	1	0.539114	1	0
GO:0008616	queuosine biosynthetic process	1	1	1	1	1	0.549063	1	0.539114	1	0
GO:0008676	3-deoxy-8-phosphooctulonate synthase activity	8	1	3	1	1	0.573358	1	0.539114	1	0
GO:0009113	purine nucleobase biosynthetic process	2	1	2	1	1	0.796656	1	0.539114	1	0
GO:0009229	thiamine diphosphate biosynthetic process	4	1	1	0	1	0	1	0.539114	1	0
GO:0009247	glycolipid biosynthetic process	2	1	0	0	1	0	1	0.539114	1	0
GO:0009416	response to light stimulus	2	1	1	0	1	0.549063	1	0.539114	1	0
GO:0009579	thylakoid	10	1	1	1	1	0.549063	1	0.539114	1	0
GO:0009584	detection of visible light	5	1	1	0	1	0	1	0.539114	1	0
GO:0009664	plant-type cell wall organization	1	1	0	0	1	0	1	0.539114	1	0
GO:0009790	embryo development	2	1	1	1	1	0.549063	1	0.539114	1	0
GO:0010264	myo-inositol hexakisphosphate biosynthetic process	2	1	1	1	1	0.549063	1	0.539114	1	0
GO:0010468	regulation of gene expression	7	1	4	1	1	0.389452	1	0.539114	1	0
GO:0015935	small ribosomal subunit	8	1	4	1	1	0.389452	1	0.539114	1	0
GO:0016125	sterol metabolic process	3	1	1	1	1	0.549063	1	0.539114	1	0
GO:0016429	tRNA (adenine-N1-)-methyltransferase activity	1	1	1	1	1	0	1	0.539114	1	0.734166
GO:0016462	pyrophosphatase activity	1	1	0	0	1	0	1	0.539114	1	0
GO:0016598	protein arginylation	3	1	1	0	1	0.549063	1	0.539114	1	0
GO:0016706	2-oxoglutarate-dependent dioxygenase activity	2	1	0	0	1	0	1	0.539114	1	0
GO:0016866	intramolecular transferase activity	4	1	2	1	1	0.30147	1	0.539114	1	0
GO:0016972	thiol oxidase activity	4	1	0	0	1	0	1	0.539114	1	0
GO:0016984	ribulose-bisphosphate carboxylase activity	1	1	1	1	1	0.549063	1	0.539114	1	0
GO:0017003	protein-heme linkage	1	1	1	1	1	0.549063	1	0.539114	1	0
GO:0017004	cytochrome complex assembly	6	1	1	1	1	0.549063	1	0.539114	1	0
GO:0017119	Golgi transport complex	5	1	2	1	1	0.796656	1	0.539114	1	0
GO:0018298	protein-chromophore linkage	5	1	1	0	1	0	1	0.539114	1	0
GO:0019140	inositol 3-kinase activity	2	1	1	1	1	0.549063	1	0.539114	1	0
GO:0019432	triglyceride biosynthetic process	1	1	0	0	1	0	1	0.539114	1	0
GO:0022904	respiratory electron transport chain	2	1	0	0	1	0	1	0.539114	1	0
GO:0030041	actin filament polymerization	7	1	3	0	1	0	1	0.539114	1	0
GO:0030071	regulation of mitotic metaphase/anaphase transition	2	1	1	1	1	0.549063	1	0.539114	1	0
GO:0030126	COPI vesicle coat	7	1	1	0	1	0.549063	1	0.539114	1	0
GO:0030131	clathrin adaptor complex	6	1	1	0	1	0	1	0.539114	1	0
GO:0030488	tRNA methylation	4	1	1	1	1	0	1	0.539114	1	0.734166
GO:0030570	pectate lyase activity	2	1	2	1	1	0.30147	1	0.539114	1	0
GO:0030975	thiamine binding	4	1	1	0	1	0	1	0.539114	1	0
GO:0031361	integral component of thylakoid membrane	2	1	1	1	1	0	1	0.539114	1	0.734166
GO:0031515	tRNA (m1A) methyltransferase complex	4	1	1	1	1	0	1	0.539114	1	0.734166
GO:0031929	TOR signaling	8	1	1	1	1	0	1	0.539114	1	0.734166
GO:0031931	TORC1 complex	8	1	1	1	1	0	1	0.539114	1	0.734166
GO:0032783	super elongation complex	4	1	1	1	1	0.549063	1	0.539114	1	0
GO:0033897	ribonuclease T2 activity	8	1	1	0	1	0.549063	1	0.539114	1	0
GO:0033947	mannosylglycoprotein endo-beta-mannosidase activity	4	1	3	1	1	0.165526	1	0.539114	1	0
GO:0034755	iron ion transmembrane transport	4	1	0	0	1	0	1	0.539114	1	0
GO:0035194	post-transcriptional gene silencing by RNA	3	1	1	1	1	0.549063	1	0.539114	1	0
GO:0042132	fructose 1,6-bisphosphate 1-phosphatase activity	12	1	0	0	1	0	1	0.539114	1	0
GO:0042555	MCM complex	5	1	1	0	1	0.549063	1	0.539114	1	0
GO:0042586	peptide deformylase activity	3	1	1	1	1	0.549063	1	0.539114	1	0
GO:0042623		2	1	0	0	1	0	1	0.539114	1	0
GO:0042773	ATP synthesis coupled electron transport	1	1	1	1	1	0.549063	1	0.539114	1	0
GO:0043141		3	1	0	0	1	0	1	0.539114	1	0
GO:0043189	H4/H2A histone acetyltransferase complex	4	1	2	1	1	0.30147	1	0.539114	1	0.734166
GO:0043190	ATP-binding cassette (ABC) transporter complex	6	1	3	1	1	0.165526	1	0.539114	1	0
GO:0043248	proteasome assembly	2	1	1	1	1	0.549063	1	0.539114	1	0
GO:0043550	regulation of lipid kinase activity	3	1	1	1	1	0.549063	1	0.539114	1	0
GO:0045038	protein import into chloroplast thylakoid membrane	2	1	1	0	1	0.549063	1	0.539114	1	0
GO:0045300	acyl-[acyl-carrier-protein] desaturase activity	7	1	3	1	1	0.573358	1	0.539114	1	0
GO:0046034	ATP metabolic process	11	1	4	0	1	0.0908843	1	0.539114	1	0
GO:0046537	2,3-bisphosphoglycerate-independent phosphoglycerate mutase activity	2	1	0	0	1	0	1	0.539114	1	0
GO:0046658	anchored component of plasma membrane	4	1	0	0	1	0	1	0.539114	1	0
GO:0046835	carbohydrate phosphorylation	8	1	2	0	1	0	1	0.539114	1	0
GO:0047617	acyl-CoA hydrolase activity	3	1	2	1	1	0.30147	1	0.539114	1	0
GO:0047750	cholestenol delta-isomerase activity	3	1	1	1	1	0.549063	1	0.539114	1	0
GO:0048037	obsolete cofactor binding	4	1	2	1	1	0.796656	1	0.539114	1	0
GO:0048193	Golgi vesicle transport	18	1	3	0	1	0.165526	1	0.539114	1	0
GO:0048208	COPII vesicle coating	3	1	0	0	1	0	1	0.539114	1	0
GO:0050080	malonyl-CoA decarboxylase activity	3	1	1	0	1	0	1	0.539114	1	0
GO:0051016	barbed-end actin filament capping	3	1	2	1	1	0.30147	1	0.539114	1	0
GO:0051017	actin filament bundle assembly	3	1	1	1	1	0.549063	1	0.539114	1	0
GO:0051716	cellular response to stimulus	4	1	0	0	1	0	1	0.539114	1	0
GO:0070772	PAS complex	3	1	1	1	1	0.549063	1	0.539114	1	0
GO:0080085	signal recognition particle, chloroplast targeting	2	1	1	0	1	0.549063	1	0.539114	1	0
GO:0005777	peroxisome	18	3	8	1	0.0667401	0.21853	1	0.558552	1	0
GO:0008964	phosphoenolpyruvate carboxylase activity	11	3	5	3	0.0851407	0.591404	1	0.558552	1	0
GO:0006099	tricarboxylic acid cycle	18	3	7	3	0.153877	0.606298	1	0.558552	1	0
GO:0005089		14	3	5	2	0.234735	0.591404	1	0.558552	1	0
GO:0042147	retrograde transport, endosome to Golgi	15	3	5	1	0.296106	0.591404	1	0.558552	1	0
GO:0006367	transcription initiation from RNA polymerase II promoter	22	3	5	0	0.707803	0.0499012	1	0.558552	1	0
GO:0000276	mitochondrial proton-transporting ATP synthase complex, coupling factor F(o)	6	3	4	2	1	0.389452	1	0.558552	1	0
GO:0003714	transcription corepressor activity	11	3	4	2	1	0.757265	1	0.558552	1	0
GO:0003855	3-dehydroquinate dehydratase activity	7	3	4	3	1	0.757265	1	0.558552	1	0
GO:0004579	dolichyl-diphosphooligosaccharide-protein glycotransferase activity	9	3	3	1	1	0	1	0.558552	1	0
GO:0004725	protein tyrosine phosphatase activity	10	3	2	0	1	0	1	0.558552	1	0
GO:0004764	shikimate 3-dehydrogenase (NADP+) activity	7	3	4	3	1	0.757265	1	0.558552	1	0
GO:0005086		9	3	0	0	1	0	1	0.558552	1	0
GO:0005094	Rho GDP-dissociation inhibitor activity	7	3	3	3	1	0.165526	1	0.558552	1	0.395716
GO:0005452	inorganic anion exchanger activity	14	3	3	1	1	0.165526	1	0.558552	1	0
GO:0005819	spindle	9	3	4	3	1	0.757265	1	0.558552	1	0
GO:0006820	anion transport	14	3	3	1	1	0.165526	1	0.558552	1	0
GO:0008963	phospho-N-acetylmuramoyl-pentapeptide-transferase activity	6	3	3	1	1	0.165526	1	0.558552	1	0
GO:0016874	ligase activity	6	3	1	1	1	0	1	0.558552	1	0
GO:0030274	LIM domain binding	7	3	3	2	1	0.573358	1	0.558552	1	0
GO:0030833	regulation of actin filament polymerization	10	3	3	1	1	0.573358	1	0.558552	1	0
GO:0032012	regulation of ARF protein signal transduction	9	3	0	0	1	0	1	0.558552	1	0
GO:0032147	activation of protein kinase activity	9	3	4	3	1	0.757265	1	0.558552	1	0
GO:0046907	intracellular transport	10	3	1	0	1	0	1	0.558552	1	0
GO:0060236	regulation of mitotic spindle organization	9	3	4	3	1	0.757265	1	0.558552	1	0
GO:0015977	carbon fixation	12	4	6	4	0.0427857	0.743184	1	0.743764	1	0
GO:0000045	autophagosome assembly	16	4	6	2	0.189616	0.162413	1	0.743764	1	0
GO:0006506	GPI anchor biosynthetic process	16	4	6	2	0.189616	0.162413	1	0.743764	1	0.539
GO:0004867	serine-type endopeptidase inhibitor activity	14	4	5	3	0.234735	0.254817	1	0.743764	1	0.395716
GO:0009611	response to wounding	16	4	5	3	0.360001	0.254817	1	0.743764	1	0.395716
GO:0008173	RNA methyltransferase activity	17	4	5	4	0.424505	0.591404	1	0.743764	1	0
GO:0016307	phosphatidylinositol phosphate kinase activity	23	4	5	1	0.751266	0.254817	1	0.743764	1	0
GO:0046488	phosphatidylinositol metabolic process	23	4	5	1	0.751266	0.254817	1	0.743764	1	0
GO:0000049	tRNA binding	9	4	3	2	1	0.573358	1	0.743764	1	0
GO:0004332	fructose-bisphosphate aldolase activity	18	4	3	3	1	0.908305	1	0.743764	1	0.395716
GO:0004652	polynucleotide adenylyltransferase activity	10	4	2	1	1	0.30147	1	0.743764	1	0
GO:0004781	sulfate adenylyltransferase (ATP) activity	8	4	4	3	1	0.389452	1	0.743764	1	0
GO:0005856	cytoskeleton	15	4	4	2	1	0.958651	1	0.743764	1	0
GO:0006368	transcription elongation from RNA polymerase II promoter	7	4	1	1	1	0.549063	1	0.743764	1	0
GO:0008184	glycogen phosphorylase activity	12	4	2	1	1	0.30147	1	0.743764	1	0
GO:0008352	katanin complex	7	4	4	2	1	0.389452	1	0.743764	1	0
GO:0010207	photosystem II assembly	7	4	4	3	1	0.757265	1	0.743764	1	0
GO:0015018	galactosylgalactosylxylosylprotein 3-beta-glucuronosyltransferase activity	8	4	4	4	1	0.757265	1	0.743764	1	0
GO:0015696	ammonium transport	14	4	4	2	1	0.757265	1	0.743764	1	0
GO:0016255	attachment of GPI anchor to protein	7	4	2	2	1	0	1	0.743764	1	0.539
GO:0016570	histone modification	11	4	1	1	1	0.549063	1	0.743764	1	0
GO:0016593	Cdc73/Paf1 complex	11	4	1	1	1	0.549063	1	0.743764	1	0
GO:0030151	molybdenum ion binding	11	4	3	2	1	0	1	0.743764	1	0.539
GO:0042765	GPI-anchor transamidase complex	7	4	2	2	1	0	1	0.743764	1	0.539
GO:0043631	RNA polyadenylation	10	4	2	1	1	0.30147	1	0.743764	1	0
GO:0051013	microtubule severing	7	4	4	2	1	0.389452	1	0.743764	1	0
GO:0006631	fatty acid metabolic process	13	2	6	1	0.0686991	0.439624	1	0.787584	1	0
GO:0000055	ribosomal large subunit export from nucleus	6	2	1	1	1	0.549063	1	0.787584	1	0
GO:0000103	sulfate assimilation	4	2	1	1	1	0.549063	1	0.787584	1	0
GO:0000339	RNA cap binding	6	2	0	0	1	0	1	0.787584	1	0
GO:0000774	adenyl-nucleotide exchange factor activity	5	2	1	0	1	0	1	0.787584	1	0
GO:0003896	DNA primase activity	5	2	3	2	1	0.573358	1	0.787584	1	0
GO:0004014	adenosylmethionine decarboxylase activity	8	2	4	1	1	0.0908843	1	0.787584	1	0
GO:0004020	adenylylsulfate kinase activity	4	2	1	1	1	0.549063	1	0.787584	1	0
GO:0004326	tetrahydrofolylpolyglutamate synthase activity	7	2	2	1	1	0.796656	1	0.787584	1	0
GO:0004367	glycerol-3-phosphate dehydrogenase [NAD+] activity	7	2	4	2	1	0.389452	1	0.787584	1	0
GO:0004488	methylenetetrahydrofolate dehydrogenase (NADP+) activity	5	2	2	1	1	0.30147	1	0.787584	1	0
GO:0004519	endonuclease activity	6	2	2	0	1	0.796656	1	0.787584	1	0
GO:0004594	pantothenate kinase activity	6	2	2	1	1	0.796656	1	0.787584	1	0
GO:0004797	thymidine kinase activity	3	2	1	1	1	0.549063	1	0.787584	1	0
GO:0004861	cyclin-dependent protein serine/threonine kinase inhibitor activity	13	2	2	1	1	0.30147	1	0.787584	1	0.734166
GO:0005674	transcription factor TFIIF complex	6	2	2	0	1	0	1	0.787584	1	0
GO:0005743	mitochondrial inner membrane	10	2	3	2	1	0.573358	1	0.787584	1	0
GO:0005801	cis-Golgi network	10	2	3	1	1	0.165526	1	0.787584	1	0
GO:0005846	nuclear cap binding complex	6	2	0	0	1	0	1	0.787584	1	0
GO:0005985	sucrose metabolic process	11	2	3	1	1	0.165526	1	0.787584	1	0
GO:0006072	glycerol-3-phosphate metabolic process	7	2	4	2	1	0.389452	1	0.787584	1	0
GO:0006098	pentose-phosphate shunt	6	2	4	2	1	0.958651	1	0.787584	1	0
GO:0006269	DNA replication, synthesis of RNA primer	4	2	2	2	1	0.796656	1	0.787584	1	0
GO:0006270	DNA replication initiation	6	2	2	1	1	0.796656	1	0.787584	1	0
GO:0006480	N-terminal protein amino acid methylation	3	2	1	1	1	0.549063	1	0.787584	1	0
GO:0006535	cysteine biosynthetic process from serine	5	2	2	2	1	0.796656	1	0.787584	1	0
GO:0006597	spermine biosynthetic process	8	2	4	1	1	0.0908843	1	0.787584	1	0
GO:0007050		13	2	2	1	1	0.30147	1	0.787584	1	0.734166
GO:0008654	phospholipid biosynthetic process	24	2	4	1	1	0.0908843	1	0.787584	1	0
GO:0009001	serine O-acetyltransferase activity	5	2	2	2	1	0.796656	1	0.787584	1	0
GO:0009331	glycerol-3-phosphate dehydrogenase complex	7	2	4	2	1	0.389452	1	0.787584	1	0
GO:0010038	response to metal ion	5	2	2	1	1	0.796656	1	0.787584	1	0
GO:0016157	sucrose synthase activity	11	2	3	1	1	0.165526	1	0.787584	1	0
GO:0016573	histone acetylation	8	2	3	2	1	0.573358	1	0.787584	1	0
GO:0016651	oxidoreductase activity, acting on NAD(P)H	6	2	2	1	1	0.796656	1	0.787584	1	0
GO:0016756	glutathione gamma-glutamylcysteinyltransferase activity	4	2	2	1	1	0.796656	1	0.787584	1	0
GO:0017069	snRNA binding	15	2	2	1	1	0.30147	1	0.787584	1	0
GO:0019237	centromeric DNA binding	3	2	2	2	1	0.796656	1	0.787584	1	0
GO:0031369	translation initiation factor binding	5	2	2	0	1	0.30147	1	0.787584	1	0
GO:0034508	centromere complex assembly	2	2	2	2	1	0.796656	1	0.787584	1	0
GO:0036459		8	2	3	1	1	0.165526	1	0.787584	1	0
GO:0042273	ribosomal large subunit biogenesis	6	2	1	1	1	0.549063	1	0.787584	1	0
GO:0042803	protein homodimerization activity	5	2	1	0	1	0	1	0.787584	1	0
GO:0045292	mRNA cis splicing, via spliceosome	6	2	0	0	1	0	1	0.787584	1	0
GO:0046168	glycerol-3-phosphate catabolic process	6	2	3	2	1	0.573358	1	0.787584	1	0
GO:0046938	phytochelatin biosynthetic process	4	2	2	1	1	0.796656	1	0.787584	1	0
GO:0048024	regulation of mRNA splicing, via spliceosome	3	2	3	2	1	0.908305	1	0.787584	1	0
GO:0051087	chaperone binding	15	2	2	0	1	0.30147	1	0.787584	1	0
GO:0051382	kinetochore assembly	3	2	2	2	1	0.796656	1	0.787584	1	0
GO:0051920	peroxiredoxin activity	6	2	3	2	1	0.573358	1	0.787584	1	0
GO:0080019	fatty-acyl-CoA reductase (alcohol-forming) activity	14	2	4	1	1	0.0908843	1	0.787584	1	0
GO:0003876	AMP deaminase activity	7	3	2	0	1	0	1	0.902101	1	0
GO:0004416	hydroxyacylglutathione hydrolase activity	9	3	1	1	1	0	1	0.902101	1	0.734166
GO:0004506	squalene monooxygenase activity	6	3	3	1	1	0.165526	1	0.902101	1	0
GO:0004733	pyridoxamine-phosphate oxidase activity	11	3	3	2	1	0.908305	1	0.902101	1	0
GO:0004827	proline-tRNA ligase activity	7	3	4	3	1	0.958651	1	0.902101	1	0
GO:0004828	serine-tRNA ligase activity	6	3	3	2	1	0.573358	1	0.902101	1	0
GO:0005375	copper ion transmembrane transporter activity	6	3	4	2	1	0	1	0.902101	1	0.929332
GO:0006090	pyruvate metabolic process	5	3	2	1	1	0.30147	1	0.902101	1	0
GO:0006433	prolyl-tRNA aminoacylation	7	3	4	3	1	0.958651	1	0.902101	1	0
GO:0006434	seryl-tRNA aminoacylation	6	3	3	2	1	0.573358	1	0.902101	1	0
GO:0008144	obsolete drug binding	4	3	2	1	1	0.796656	1	0.902101	1	0
GO:0015937	coenzyme A biosynthetic process	8	3	3	1	1	0.573358	1	0.902101	1	0
GO:0016310	phosphorylation	7	3	3	1	1	0.165526	1	0.902101	1	0
GO:0017176	phosphatidylinositol N-acetylglucosaminyltransferase activity	8	3	2	1	1	0.796656	1	0.902101	1	0
GO:0019243	methylglyoxal catabolic process to D-lactate via S-lactoyl-glutathione	9	3	1	1	1	0	1	0.902101	1	0.734166
GO:0032040	small-subunit processome	8	3	3	1	1	0.908305	1	0.902101	1	0
GO:0032264	IMP salvage	7	3	2	0	1	0	1	0.902101	1	0
GO:0035434	copper ion transmembrane transport	6	3	4	2	1	0	1	0.902101	1	0.929332
GO:0042128	nitrate assimilation	5	3	1	1	1	0	1	0.902101	1	0.734166
GO:0050242	pyruvate, phosphate dikinase activity	5	3	2	1	1	0.30147	1	0.902101	1	0
GO:0050790	regulation of catalytic activity	6	3	2	2	1	0.796656	1	0.902101	1	0
GO:0009396	folic acid-containing compound biosynthetic process	15	4	5	2	0.296106	0.591404	1	0.95488	1	0
GO:0016831	carboxy-lyase activity	18	4	5	2	0.487928	0.981354	1	0.95488	1	0
GO:0000776	kinetochore	5	4	4	4	1	0.958651	1	0.95488	1	0
GO:0004807	triose-phosphate isomerase activity	16	4	3	0	1	0.165526	1	0.95488	1	0
GO:0051260	protein homooligomerization	6	4	4	3	1	0.389452	1	0.95488	1	0.395716

## Sheet: KEGG_enrich
KEGG ID	Annotation	#Genome	#Root	#Leaf	#Both	Leaf.KEGGenrich	Leaf.PosEnrich	Root.KEGGenrich	Root.PosEnrich	Leaf-Root.KEGGEnrich	Leaf-Root.SigSameDir
10	Glycolysis / Gluconeogenesis	446	170	209	113	1.66089e-13	0.000422049	8.31369e-05	0.331128	1.06062e-06	7.78455e-06		Enriched in leaf
20	Citrate cycle (TCA cycle)	309	92	139	51	3.46928e-08	0.985361	0.496812	0.99983	0.490928	0.0028743		Enriched in root
30	Pentose phosphate pathway	245	156	144	111	0	9.7173e-11	0	0.00996964	0	1.15661e-09		Enriched in both
40	Pentose and glucuronate interconversions	401	89	97	48	0.997405	0.000361986	0.999702	0.0342269	0.994598	0.00541905		Upregulated
51	Fructose and mannose metabolism	200	92	74	46	0.0217099	0.000179705	5.66754e-07	0.0484456	0.00782944	0.0516448		Downregulated
52	Galactose metabolism	459	223	188	112	8.96774e-07	0.0354101	0	0.879262	7.75385e-06	1.1027e-10		0.9 < p < 0.95
53	Ascorbate and aldarate metabolism	157	63	67	38	0.000506529	0.123233	0.00245835	0.00728059	0.00562357	0.00403225		0.05 < p < 0.1
61	Fatty acid biosynthesis	425	150	200	98	3.20743e-13	3.23426e-05	0.00722836	0.914555	0.000249649	0
62	Fatty acid elongation in mitochondria	223	113	18	2	1	0.999986	2.77707e-11	1	1	0
71	Fatty acid metabolism	597	227	102	33	1	0.901968	8.52207e-06	1	1	0.316841
72	Synthesis and degradation of ketone bodies	18	10	6	4	0.297658	0.991592	0.00595423	0.967882	1	0
100	Steroid biosynthesis	125	50	61	38	6.74699e-06	2.98818e-05	0.00620797	5.22644e-09	4.36392e-05	0.000117288
120	Primary bile acid biosynthesis	34	16	6	4	0.931728	0	0.0110448	0.52768	1	0
130	Ubiquinone and other terpenoid-quinone biosynthesis	129	24	23	14	0.999295	0.0500378	0.997625	0.262837	0.956231	0
140	Steroid hormone biosynthesis	412	140	100	37	0.997422	1.31887e-06	0.0328928	0.631874	0.999995	0
230	Purine metabolism	1620	642	671	398	0	0	0	0	0	3.98348e-13
231	Puromycin biosynthesis	0	0	0	0	1	0	1	0	1	0
232	Caffeine metabolism	23	6	8	0	0.248989	0	0.557414	0.990416	1	0
240	Pyrimidine metabolism	1300	447	532	262	4.44089e-16	2.01974e-06	0.000194282	6.62803e-14	0.0003373	0.00181701
250	Alanine, aspartate and glutamate metabolism	196	73	106	61	2.44149e-12	0.109014	0.0113312	0.113133	1.75393e-07	0
253	Tetracycline biosynthesis	14	1	7	1	0.0352951	0.314619	1	0	1	0
260	Glycine, serine and threonine metabolism	296	121	127	62	2.76046e-06	0.0108324	2.27525e-05	0.340441	0.0217968	5.56925e-05
270	Cysteine and methionine metabolism	488	198	246	123	0	1.02238e-06	1.94794e-07	0.105722	5.14702e-07	3.18011e-06
280	Valine, leucine and isoleucine degradation	235	94	78	30	0.174139	5.15885e-06	0.00038154	1	0.938891	0.999974
281	Geraniol degradation	36	16	7	2	0.90156	0.996209	0.0214342	0.999238	1	0
290	Valine, leucine and isoleucine biosynthesis	149	42	62	18	0.00164909	1.93629e-10	0.643063	0.39703	0.921932	0.00383971
300	Lysine biosynthesis	41	13	19	8	0.0110783	0.0765349	0.331199	0.0224621	0.234219	0
310	Lysine degradation	299	121	108	61	0.0170965	0.999988	3.90618e-05	0.752321	0.0368719	7.12121e-05
311	Penicillin and cephalosporin biosynthesis	9	4	4	2	1	0	1	0.084474	1	0
330	Arginine and proline metabolism	265	95	120	66	1.68872e-07	0.151533	0.0159082	0.834166	0.000221522	4.24942e-07
331	Clavulanic acid biosynthesis	0	0	0	0	1	0	1	0	1	0
340	Histidine metabolism	42	16	22	14	0.000957395	0.0265368	0.0950099	0.174094	0.0022301	0.0802152
350	Tyrosine metabolism	284	118	127	81	1.86836e-07	0.151738	1.16283e-05	0.652656	1.8488e-07	5.06652e-05
351	DDT degradation	0	0	0	0	1	0	1	0	1	0
360	Phenylalanine metabolism	252	76	89	43	0.0459861	0.0192175	0.438275	0.0134195	0.390886	0.00122177
361	Chlorocyclohexane and chlorobenzene degradation	15	4	7	0	0.0557315	0	1	0.95488	1	0
362	Benzoate degradation	22	8	2	0	1	0.796656	0.184579	0.978913	1	0
363	Bisphenol degradation	1	0	0	0	1	0	1	0	1	0
364	Fluorobenzoate degradation	2	0	2	0	1	0	1	0	1	0
380	Tryptophan metabolism	106	43	40	15	0.0463892	0.864255	0.00734755	0.923791	0.705986	0.00970321
400	Phenylalanine, tyrosine and tryptophan biosynthesis	234	77	111	57	2.20452e-08	0.99474	0.143354	0.966324	0.000941559	4.84751e-07
401	Novobiocin biosynthesis	32	12	12	8	0.149421	0.133058	0.130736	0.00678671	0.072541	0
402	Benzoxazinoid biosynthesis	8	3	6	2	0.00146898	0	1	0.15669	1	0
410	beta-Alanine metabolism	151	54	50	30	0.222028	0.920063	0.0508042	0.998159	0.122211	0
430	Taurine and hypotaurine metabolism	31	13	15	8	0.0116404	0.816269	0.0524343	0.613316	0.0607706	0
440	Phosphonate and phosphinate metabolism	15	13	5	5	0.296106	0.0499012	4.99309e-07	0.613316	0.0272766	0
450	Selenocompound metabolism	87	42	37	22	0.00673367	0.349759	0.0001051	0.944148	0.0139227	0.0100017
460	Cyanoamino acid metabolism	167	55	63	33	0.0198808	0.783434	0.175165	0.00755774	0.119764	0.0127118
471	D-Glutamine and D-glutamate metabolism	34	11	20	11	0.000168805	0.410992	0.303853	0.36893	0.00666864	0
472	D-Arginine and D-ornithine metabolism	8	0	2	0	1	0	1	0	1	0
473	D-Alanine metabolism	5	1	0	0	1	0	1	0	1	0
480	Glutathione metabolism	402	180	200	112	3.33067e-16	0.17104	1.03442e-10	0.0100344	5.43151e-09	2.75283e-06
500	Starch and sucrose metabolism	1130	371	398	209	0.000320276	0.000591115	0.0148744	0.000221989	0.0436972	3.18634e-14
510	N-Glycan biosynthesis	45	12	19	9	0.0346631	0.170565	0.616299	0.713526	0.206238	0.0619654
512	Mucin type O-Glycan biosynthesis	13	5	7	4	0.0205742	0.845849	0.164044	0.573041	1	0.290521
513	Various types of N-glycan biosynthesis	21	8	9	4	0.0760597	0.148184	0.146057	0	1	0.711299
520	Amino sugar and nucleotide sugar metabolism	488	224	171	116	0.0149576	3.58456e-06	2.90878e-14	0.149768	1.96446e-05	0.0217286
521	Streptomycin biosynthesis	35	23	19	18	0.000998566	0.0274672	2.70869e-06	0.0409882	4.16308e-07	0.00383971
522	Biosynthesis of 12-, 14- and 16-membered macrolides	0	0	0	0	1	0	1	0	1	0
523	Polyketide sugar unit biosynthesis	3	1	1	1	1	0	1	0.539114	1	0.734166
524	Butirosin and neomycin biosynthesis	9	4	2	1	1	0.30147	1	0.37334	1	0
531	Glycosaminoglycan degradation	55	29	25	14	0.00686238	0.0252036	0.000121369	0.00421892	0.0321555	0.237902
532	Glycosaminoglycan biosynthesis - chondroitin sulfate	30	16	11	7	0.177673	0.189412	0.00206351	0.0725306	0.113229	0.114964
534	Glycosaminoglycan biosynthesis - heparan sulfate	12	7	6	4	0.0427857	0.162413	0.00934759	0.295592	1	0
540	Lipopolysaccharide biosynthesis	8	3	4	2	1	0	1	0.15669	1	0
550	Peptidoglycan biosynthesis	13	13	1	1	1	0	0	0.79942	1	0
561	Glycerolipid metabolism	868	274	321	150	2.09284e-05	0.033753	0.136339	0.0953977	0.289815	1.29639e-06
562	Inositol phosphate metabolism	209	87	89	52	9.15181e-05	0.0192175	0.000121035	0.113982	0.000873452	2.08258e-06
563	Glycosylphosphatidylinositol(GPI)-anchor biosynthesis	23	6	2	2	1	0.796656	0.557414	0.150488	1	0
564	Glycerophospholipid metabolism	740	302	245	177	0.0630051	0.00094698	8.7677e-11	0.000177069	1.29148e-07	2.92866e-12
565	Ether lipid metabolism	75	48	35	26	0.00116323	0.219945	2.57619e-10	0.224479	4.12914e-05	0.0171843
590	Arachidonic acid metabolism	217	88	81	40	0.0139502	8.92619e-14	0.000325763	3.74358e-05	0.210678	0.00924214
[truncated: 74 more rows]
